# Supplementary material for: Sympatric Pieris butterfly species exhibit a high conservation of chemoreceptors
Source: Frontiers journal article supplement (doi:10.3389/fncel.2023.1155405), 2023-05-11

**Conserved motif sequences of ORs**

1.
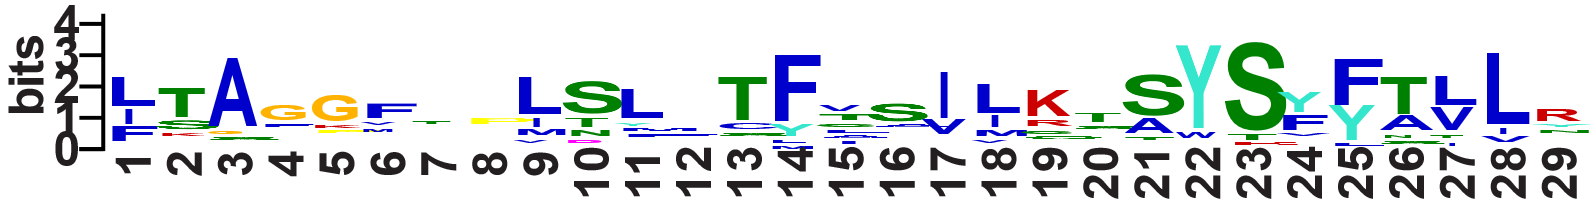


2.
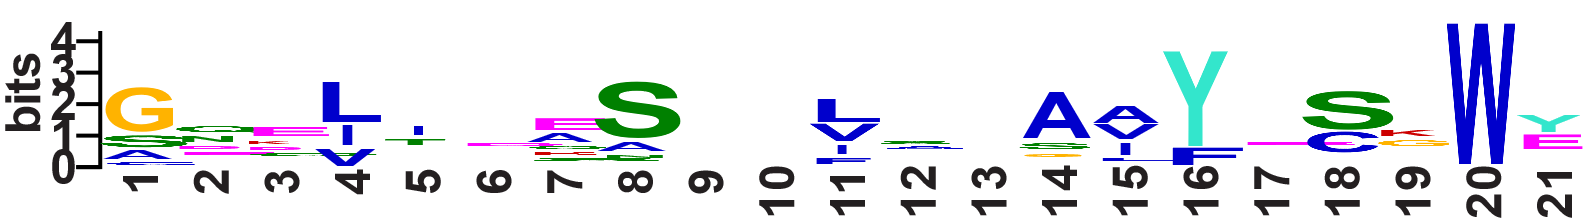


3.
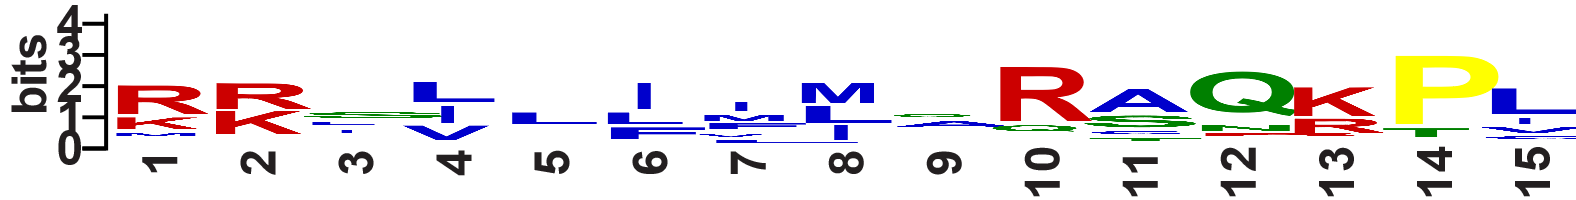


4.
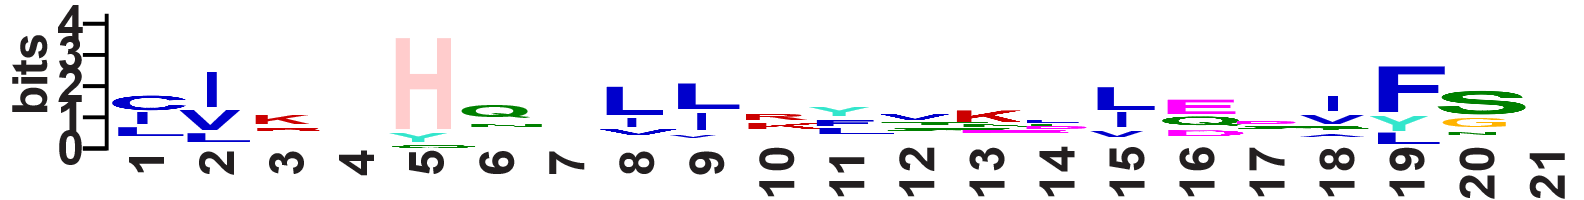


5.
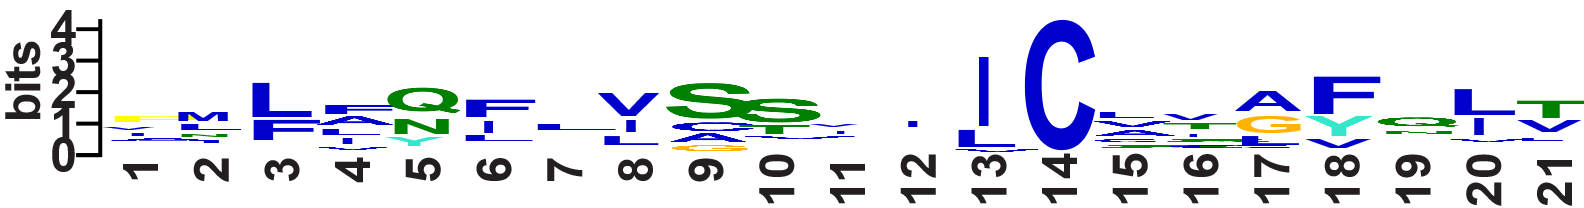


6.
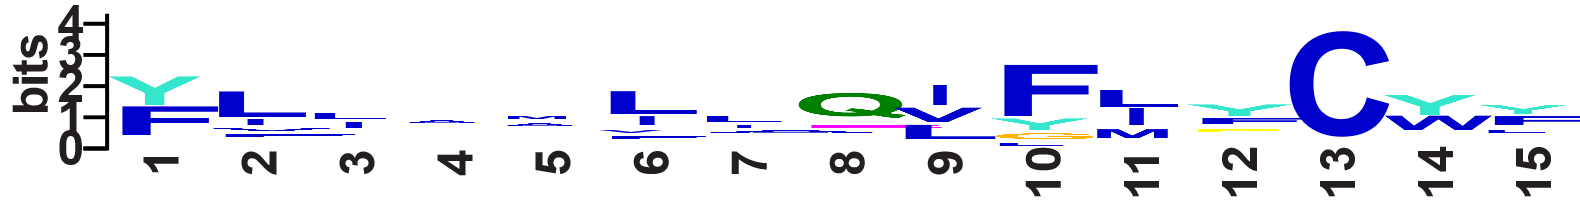


7.
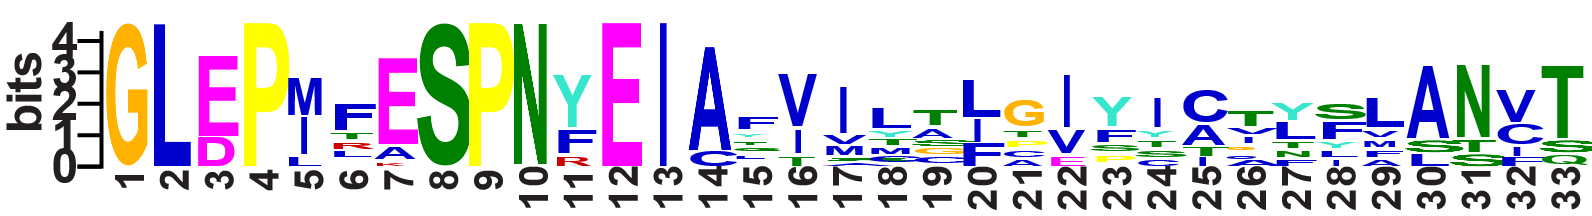


8.
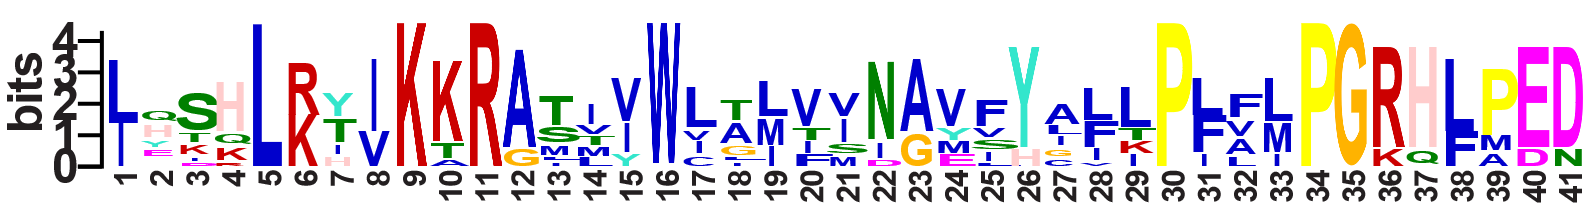


9.
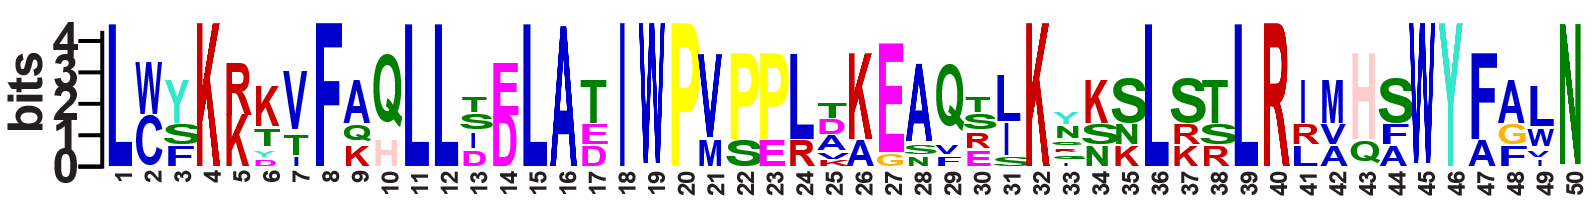


10.
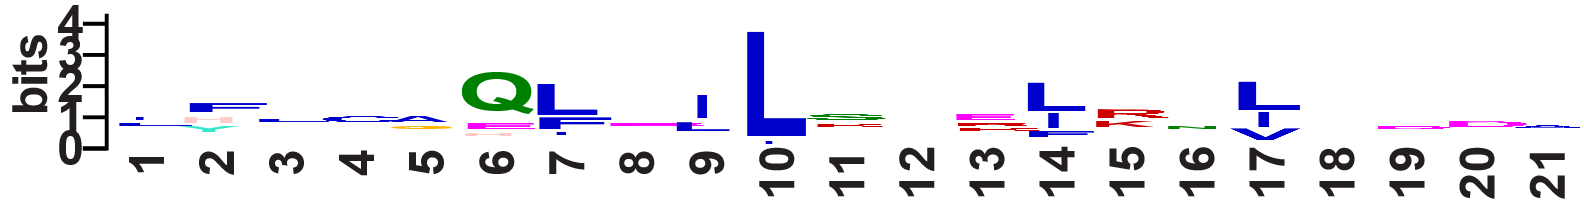


**Conserved motif seqeuences of IRs**

1.
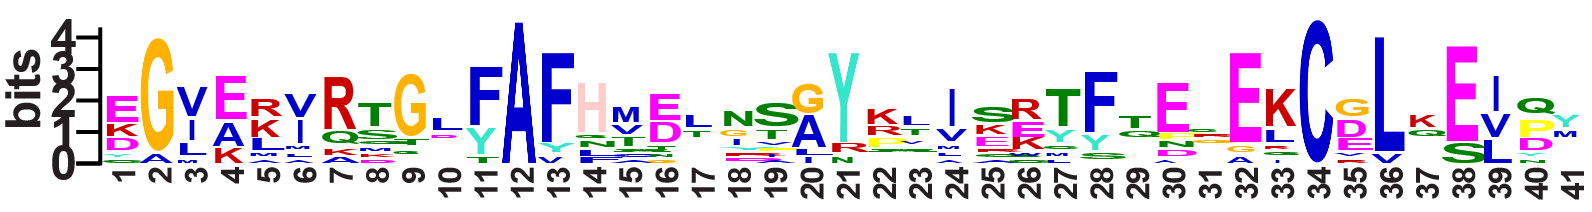


2.
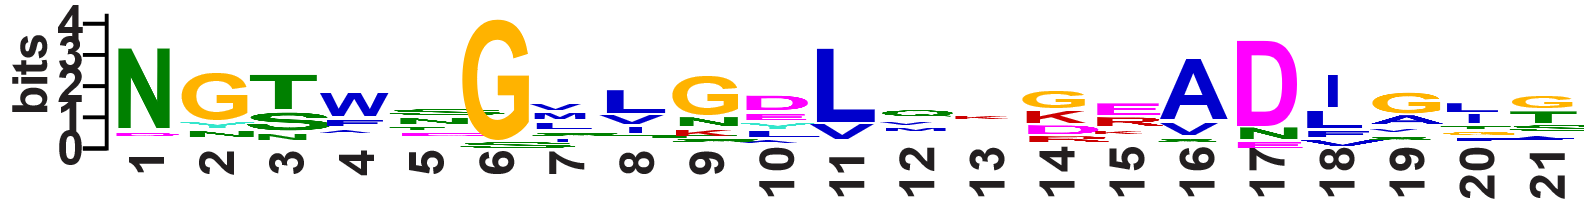


3.
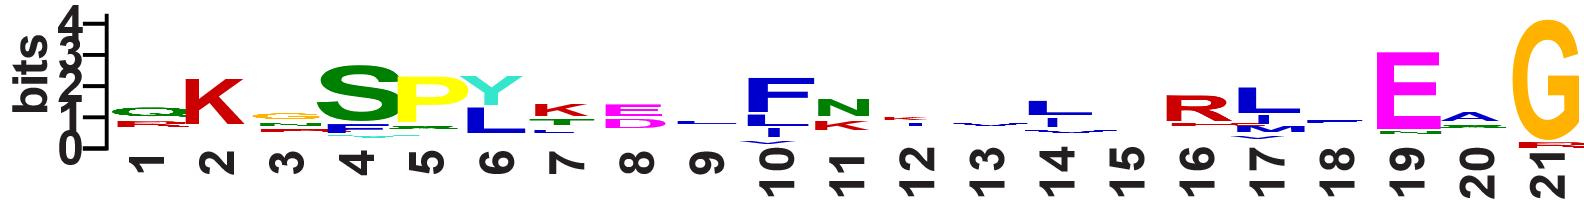


4.
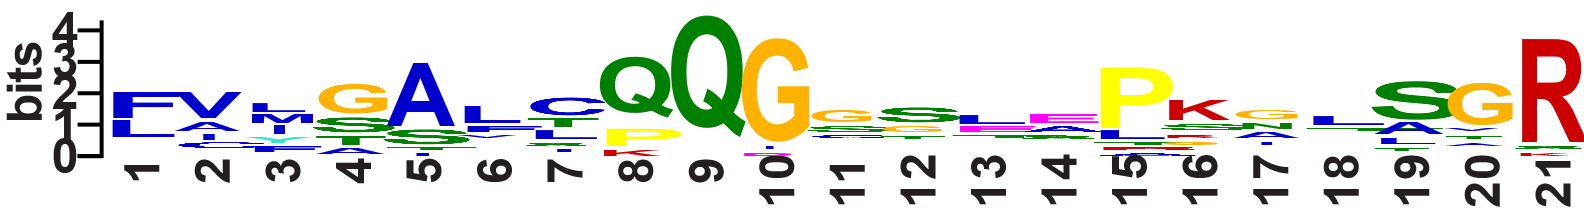


5.
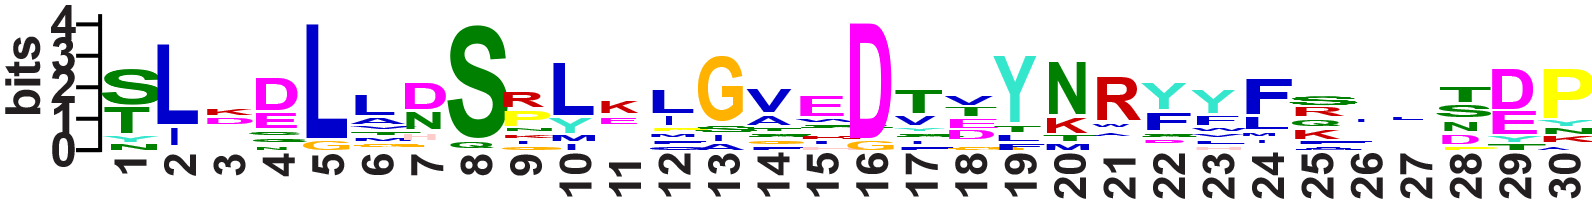


6.
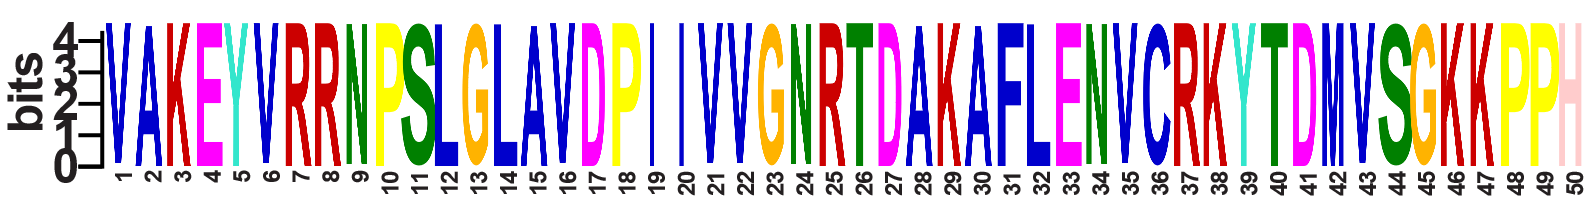


7.
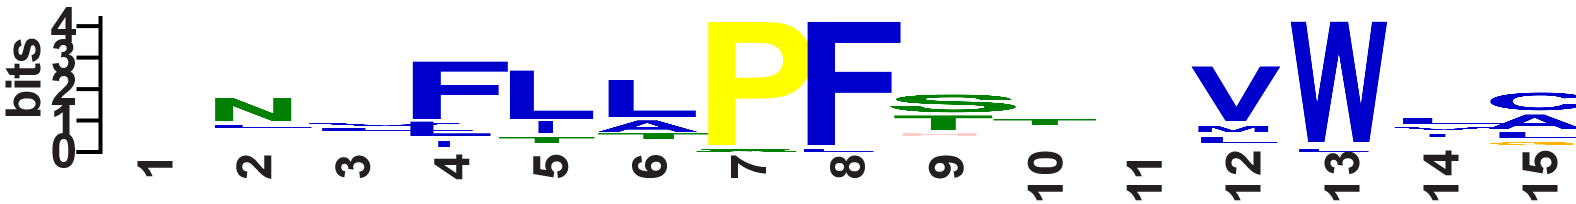


8.
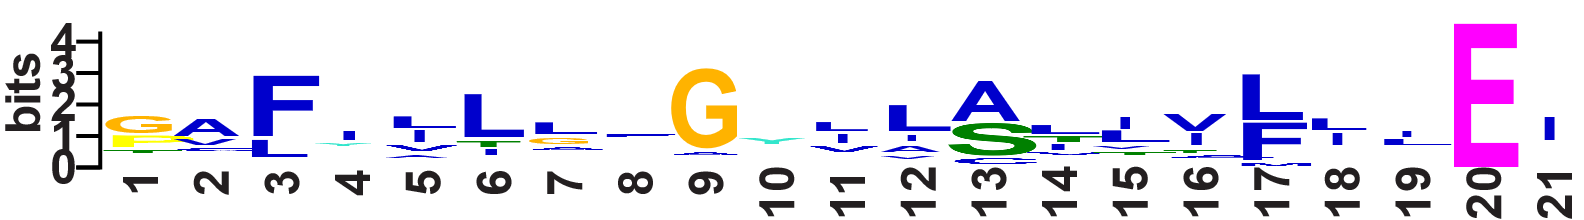


9.
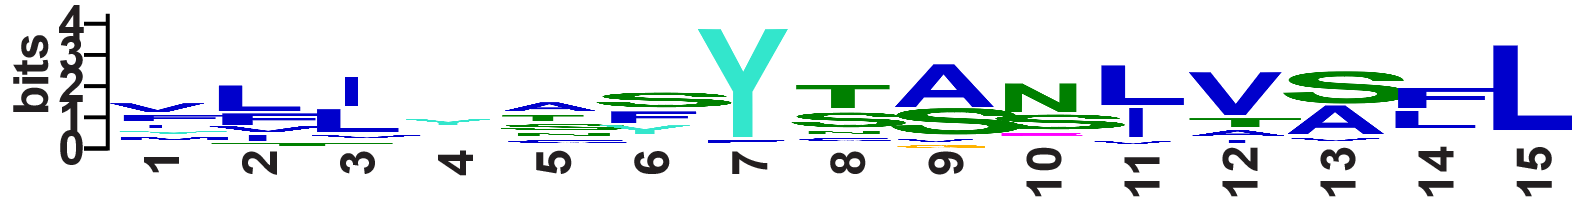


10.
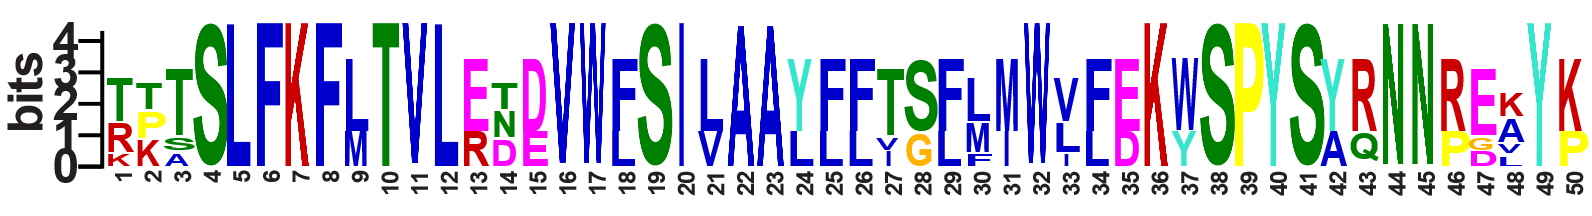


**Conserved motif seqeuences of GRs**

1.
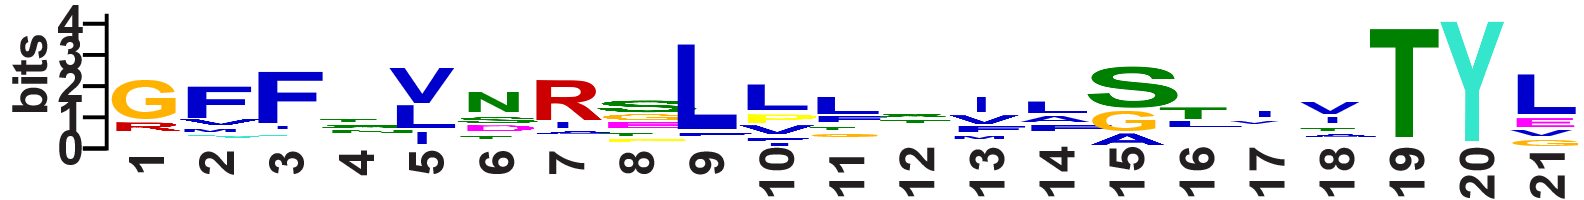


2.
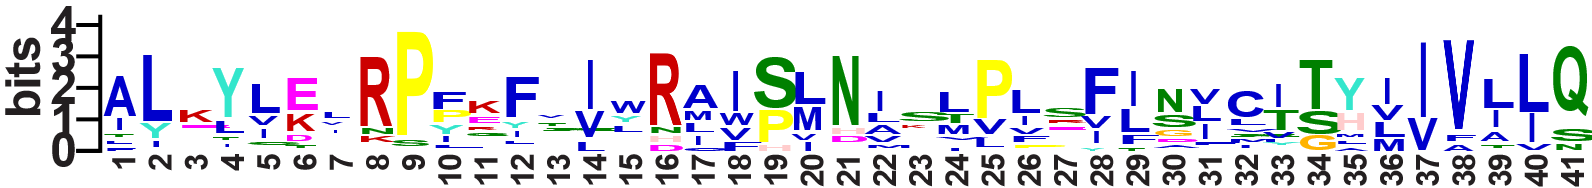


3.
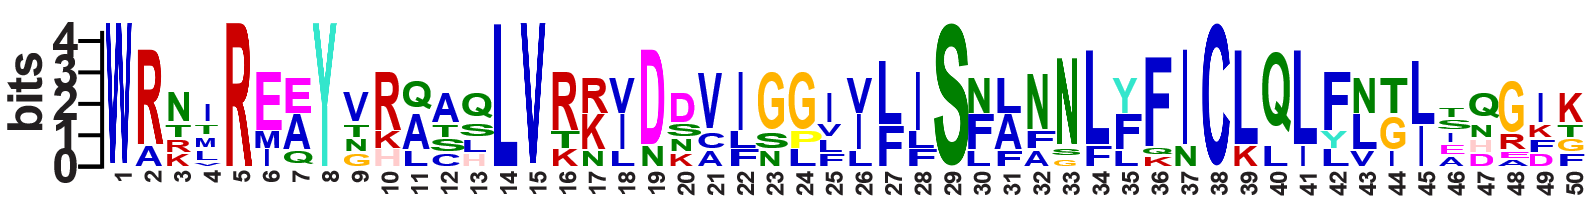


4.
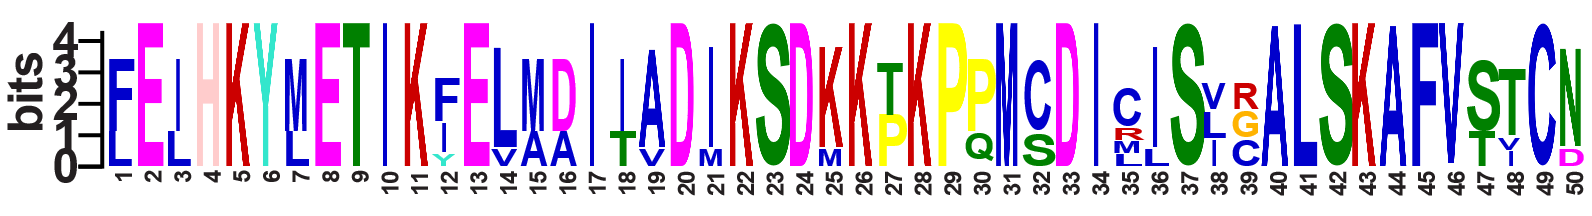


5.
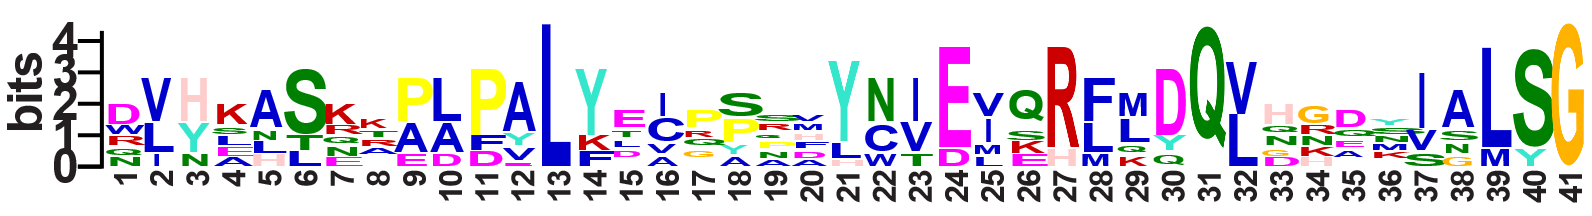


6.
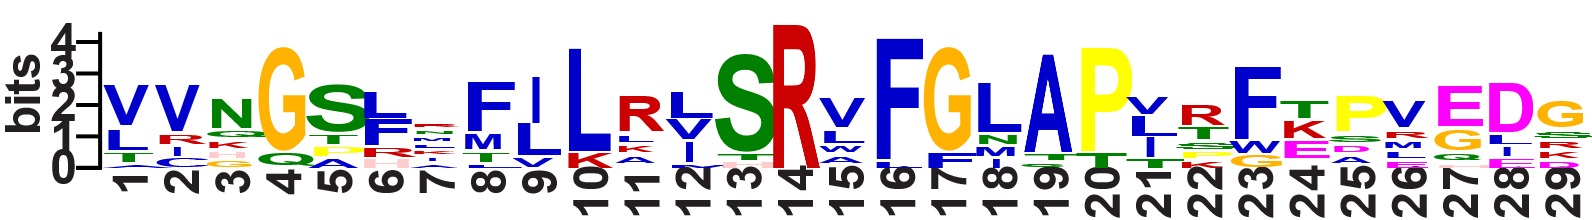


7.
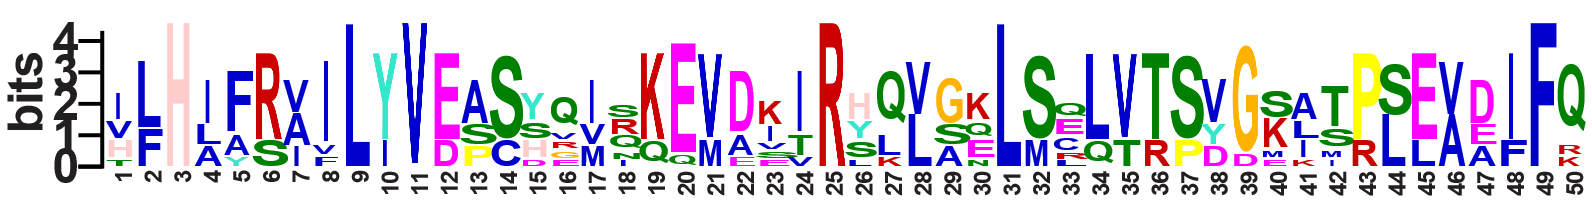


8.
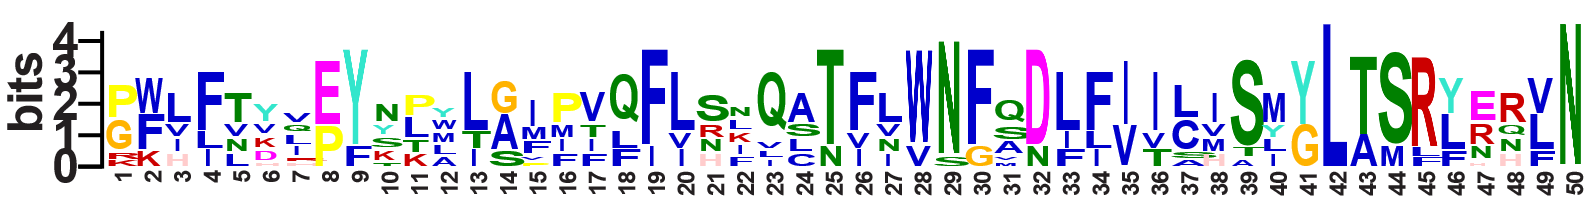


9.
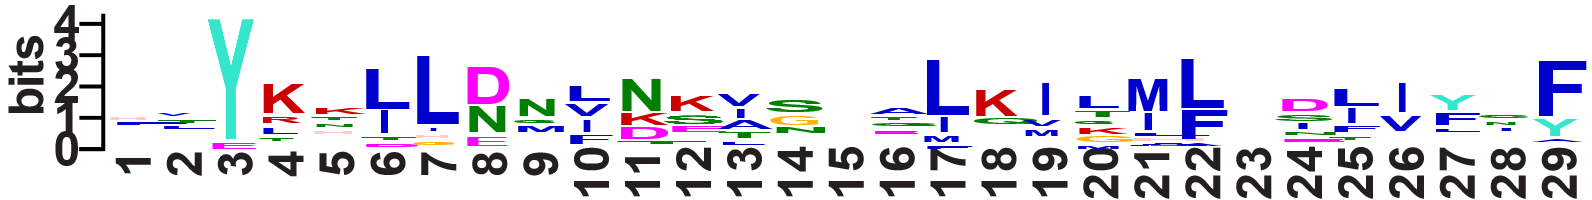


10.
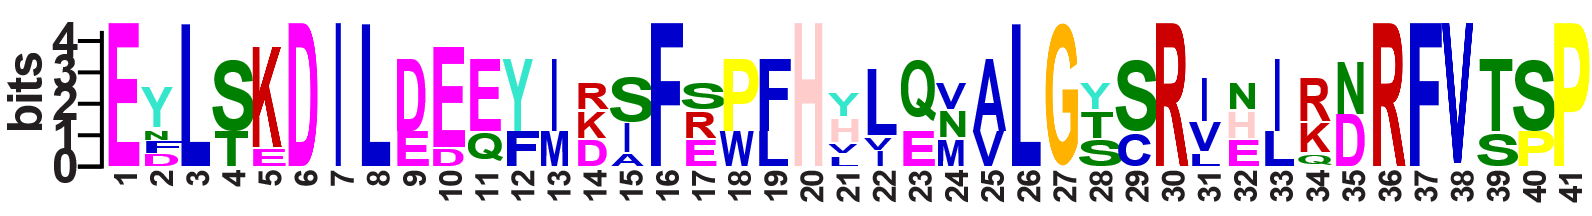

Supplement: Data_Sheet_1.ZIP [file S4_Conserved motif sequences.docx]
