# Supplementary material for: Sympatric Pieris butterfly species exhibit a high conservation of chemoreceptors
Source: Front Cell Neurosci. 2023 May 11;17:1155405. doi: 10.3389/fncel.2023.1155405 (PMC10210156; doi:10.3389/fncel.2023.1155405)
Supplement: Supplementary file 1 [file Table_1.XLSX]

## Sheet: Sheet1
Species	Acc. No	Database	Affiliation	Genome size	Scaffold N50	Scaffold L50	Number of contigs	Contig N50	Contig L50	Genome coverage	Assembly level	BUSCO (%)
												Single-copy	Duplicated	Fragmented	Missing	Complete
Pieris brassicae	GCF_905147105.1	NCBI	Wellcome Sanger Institute	292.3 Mb	21.5 Mb	7	430	21.3 Mb	7	92.0x	Chromosome	97.6	0.5	0.2	1.8	98.1
Pieris brassicae	GCA_942653925	NCBI	Max Planck Institute for Chemical Ecology	265.9 Mb	na	na	87	18.5 Mb	7	76.0x	Contig	na	na	na	na	na
Pieris rapae	GCA_905147795.1	NCBI	Wellcome Sanger Institute	256.4 Mb	10.7 Mb	12	43	10.7 Mb	12	56.0x	Chromosome	98	0.5	0.2	1.3	98.5
Pieris rapae	GCA_001856805.1	NCBI	The University of Texas Southwestern Medical Center	245.9 Mb	617.3 kb	118	14195	55 kb	1300	102.9x	Scaffold	99.2	0.3	0.1	0.4	99.5
Pieris rapae	v1_HIRISE	LepBase	University of Chicago	322Mb	3.7M	23	28665	18368	na	na	Chromosome	na	12.9	2.6	3	94.4
Pieris napi	GCF_905475465.1	NCBI	Wellcome Sanger Institute	319.2 Mb	13.1 Mb	12	83	8.3 Mb	14	60.0x	Chromosome	97.4	0.7	0.1	1.8	98.1
Pieris macdunnoughi	GCA_905332375.1	NCBI	Stockholm University	316.5 Mb	na	na	106	5.2 Mb	20	90.0x	Contig	na	na	na	na	na
Heliconius melpomene	GCA_000313835.2	NCBI	Heliconius Genome Sequencing Consortium	273.8 Mb	194.3 kb	345	11657	51 kb	1247	100.0x	Scaffold	na	na	na	na	na
Danaus plexippus plexippus	GCA_009731565.1	NCBI	Princeton University	248.7 Mb	9.2 Mb	12	10791	108 kb	567	522.0x	Chromosome	97.3	1.6	0.3	0.7	98.9
Manduca sexta	GCF_014839805.1	NCBI	Johns Hopkins University	470 Mb	14.2 Mb	14	6226	424.9 kb	297	38.0x	Chromosome	91.5	7.5	0.2	0.8	99
Spodoptera litura	GCF_002706865.1	NCBI	Southwest University	438.9 Mb	915.5 kb	143	13636	68.3 kb	1784	111.0x	Chromosome	98.7	1	0.2	0.2	99.6
Phoebis sennae	GCA_001586405.1	NCBI	UT Southwestern Medical Center	287.5 Mb	299.1 kb	267	18885	26.4 kb	3170	100.0x	Scaffold	na	na	na	na	na
na: data not found
