# Supplementary material for: Sympatric Pieris butterfly species exhibit a high conservation of chemoreceptors
Source: Front Cell Neurosci. 2023 May 11;17:1155405. doi: 10.3389/fncel.2023.1155405 (PMC10210156; doi:10.3389/fncel.2023.1155405)
Supplement: Supplementary file 2 [file Table_2.XLSX]

## Sheet: Pbrassicae_aa
>PbraGR1
MNDSRNFKMNPNRIEQIRKFDAYKEFNGKAIKEYDAKEVYGPQITDKDGELLDKHDSFYITTKSLLVLFQIMGVMPIMRVPKHAQTTKRTTYNWISKSTLWAYLVWCLESIIVIRVGKDRFANFQQNSNKRFDEVIYNIIFLSILIPHFLIPVASWRHGPQVAIFKNMWTHYQLKYLKITGTPIIFPNLHSLTWGLCVFSWALSFAVILSQHYLQDDFELWHSLAYYHIIAMLDGFCSLWYINCNAFGTASKGLATNLHKALEAEDPALKLAQYRHLWVDLSHMMQQLGRAYSNMYGIYCMVIFFTTTISLYGSLSEILEHGLSYKEMGLFVIVGYCMTLLFIICNEAYHATRKVGLEFQVRLLNVNLGVIDRNAQREVEMFLVAIAKNPPIMNLDGFT…
>PbraGR10
MAKEERDTKRLLCHGPLNMVLKLSRVFGMAPLTFTPEGIKFSLVYYIYSIAFITALETTIFVGFVLDVTHPKQSRRAATTHMIWLAYQSVLSAVTIVGCFAAPKRCRCILDALTRIEKIRNFLGEIKSKKIVVIYMYATIFSFLSAVAILCFIDWFQNFYTAFYLNNQVSLHLLSTFYVEYIIELLLEFQFMIVVIRLTRILRVVNGRLSKLLEVLDKKKRRNKKLLINNFTLPKNILFNNDSNQMEVNEEQASEEIRVLWLVYELVCDLIRRVNRGYGLILLLLLQSFFLHFIMTPYYMINLYQIPSGLSTLGQQVAWFHFHAASVILIVEPCHGVQQQMAKTRSLVSKLMCQTRPYGSLSRSLAAFFRSLTLEQPLIAPLGMSVLERPLLITILGVV…
>PbraGR12
MLYKCINLIMFCNFLCGFYVKFSKFYMTILSTLYCASISVFILYGLYSRPLISKFYVWSNNFCIFDTICFILFTYINGTVYVSKFLSKISEIDGKLQLELSTISIKTILFFLLIFLEKIFYTLEYYARNDVSTTVYKISIAAWLVYKYGSFFNSVLRNILFELMRQRMKGLRLTLEHNINQDGVDKVEEINKTLEIYKMILDTNKSFGYIVKYYIIRDFFAAFYYVIITTIGISYNSKKSIRPHMAVDAVANILMACLPCIVLQGAINEVANIKKNLVQEFLKCPVEESHSGTRDKIKDAIKYLELNPFMFPILHLFSLNLTVPFYFINLCSTYVIVAIQFAKLA*
>PbraGR13
MIKTSKFLKMIFILQYLCGFYTDFFKRRKWNTVFRIIMAILIVNILYCSLKSMQQQINFFFFSVGLLNLIDYTLAVTLSFVGGNVLHYCHRKLLKLDCQMRWRKIKLSMSITVSIFLILFFEKSFIGWGYYNSIKERLALDFNWNDLVDLIIWYLIKFGILLNDFVRNLTFEWIWTYMKTLRKTFQDTSFKRKKLVSNLQTDDIQRVIFGYIGTLDSLNSMGLTFKILIFWNFCFAFIYILIATVGIVYTPVREISLYMAAETLYHIIIFLYPCVLIELTRNEVDKIKLLLTEIYTLSSDEKILTKTEDALMLLEVRPFQIVVFRLISINIHLPLHFLAVITSYVIVTVQFTHAFE*
>PbraGR14
FITKRLGLFFNGMIRSIIFEWVLFSTKTMRISFEKLVFKSNQIISNLEPKHILRVVSTYTKLLENINSVGLTLKIMILKDCIFTFYYVIFSSVGLVFAPDYSISPYMVAEIIFQLVKFVLPCVLMELTKSEVEKMRVILVEITALSSDNKLRAKAEAAIKFLEIVPFEFTLWRIVSVNIRLPLRFFVLMTTYIIVSIQFMHVFG
>PbraGR15
MPQTIPSLMWIVLLSQNLCGYYTIIYKRHIFNIFARLLCITLIYITVYKTITQLYKEESTYYTYGEICHLLYFLIGALMAFIDGNVFYRFYSNVHSIMSEYSLKIDYRSVMRTTTVFTVIFFIEFYIIWSYLAEQIATDFLLLFLIISERFGYFTTAISRCLIFECNCFSVKTLRISFDQLVNKSNAIILEPNQKVLLDVVTTYTNLLNNINSVGGPLKITILRDFFFTFFYVIYSSIGIVYAPENAINKLVVVKVSVYILTLFLPCVFMELAKIEVDKIRLIYVEISAHSSDKEIRRKAEDALVLLEIVPFEFTVWRFISVNISLPFQFVALLTTYVIVTMQFMHVFG*
>PbraGR16
MTSVIKQSLITILLVSRWFGITPVKWESLQLRVSKGFAIYGALLFCFIAMLMTNETFSVILAIIRAKEIDVENNRIELTLMKLILKELILFGYMVFKGPRRMAIMIEVLDQLEKVTEKKDGCTPEKRGRKFYYFFVSLTILLVIVYINKYIFDLYDGKEPILENVKLFMLTFCIRYACAISGFHFVLVALLIHALLASINEDLEEIFKDNVPPSNVILYKKPVSVLVNRNISPTIDSIGLTPAGNFGAAKTATENTKTDGRIRSISRSYVNYCYLARKLNDSEDIVLLIYVFKLGINIAVSLFNVLKYDDYITSGVNMVRVSFTLHNIIIALTTGTQLMLFVEPSYRAQVELRKTTLLVSRALNQALERNDLDQLNELRHLLKMLHLNRPVYSAFGVFN…
>PbraGR17
MFYYILILIETDFFYSFNFSLTCINSVRSATESARVTIYLAFSLLCTRIRIFQKRLKGNICHRNETHFADLNKVYLTIHDMFKEISPSLSSLMAINLAYIFVDSLIVQYKITYMILGNSSSQDSFFGMSMVLRCIMNHSTVLYPTFIMEYIAEILDNVKIYLMEQVITATDKKKKEDIKDLLKLVKEKPIIITILRAIPVNMSLPFGYISLSITYIVFLLQV*
>PbraGR18
MVKYVYDFKKLMILRIILGWYNEYFIAGLILKIYCGISLLVQLVFFIHLLILNKSSYNINLLFKIFGILLGTIPSFMLSILTGDRYLFVFCRWNDIIDSDKQAKRIFRIHQIMFDSVHFFVIIFYIIFYSWWYLCCTKFSFAAYIPGIILRFTIEMEKIPLFLIFSILLCRVKLFQRNICLDLKFGSVFSLDHYHHVYLKILENLKKTSSSITILMLTQTTLFFWDSINTMYIILHFYLAEGHIRTYHVVLTCRVIHGYVSIVFPVYVMEYIADILENIKIQLIERKLRCIDDNRRAEITIMLNLLMEKPIRFRMLRAFPIDKTFPLKITSLSITYLVFMLQYIRN*
>PbraGR2
MIPDHLFDEGINNSLLQKDMECVKKHRDVYEKSQRDYEREQRYMLSSQDSDTCEIHDQFYRDHKLLLVLFRALAVMPITRSRPGTITFSWRSRATAYAICFYIIATVVVLFVGYERVMILRSIRKFDDYIYAVIFVAFLVPHFWIPFVGWGVANQVAIYKTSWGKFQVRYYRVTGENLQFPNLKTTIVIISVGCLLLAVCFLLSLCALLEGFLLRHTAAYFHIITMINMNCALWYINCRGIKTASQSLSECFRRDVNLECTAHLISSYRYLWLNLSELLQSLGNAYARTYSTYCLFMFFNITIAIYGALSEIVDHGFGFTFKEMGLFVDAAYCSTLLFIFADCSHKSTLKVAAGVQDTLLSIDVLSVDRPTQKEIDHFIQAIEMNPAVVSLKGYAHVNR…
>PbraGR22
IAVLIVIGIPYLAALCMSQSPYGINGIKFELANAAPVLLVVIQFVISMLVPFMFSKENVIIVKSLSQIDHLLNVDEKHYRICKRKILMVKLSQSPFTWNGVKFEFISASPSIFMTSQFITSLIVPFLFSKQNIIFIKTISEIDSLLLSFSLSLTYELYVNQEMSVMLLCMAVIAFGQKFQVVFFSLYINMITQRINVLNNHLRNFTPNENGIVMKKTSQMYYIGCKVESMSIKSLSIAFSLMGNMIQTTNKIFEINIFQTLISTFFYIIIAIWTYIYYYRILKDLTFFVSILYWCTGELFFLGLTCYVCEKLLNKRNETKTFVNNIVMNYNFSPKTRGQAKTLLEVARAWKLNVVAYGMFEINITLLLRFVGVATTYLIFLCQVSHFV*
>PbraGR27
PGAPQINNLVESKYHILHQIKYLLGLQMVVGINRLYLIFNNKYAILVGYFYTVIITGLTMYVILSNNMTSATYIVFRNTVVIEFALLSFNSMVLYKNTFKKFVEKMEMFDTMLNIKNHRQLDSFTLIHLFMYIFIFAILFILDLLYILNFDNEIHDKHVNYAYLAMNFAFICHDTEIIFFCVLLTMILRRVKIIKGHVRKLFLRGKNSSNKLEGLSYNANLDVSHLHNAYDLLHTCSEKLNSAMNFPMVLLFTASGLTSIMLLKNVFTVLQQTDENNKFYYLFQFVKYVVTYTIVYCMKFTIFFIMPCYCSNITTTQVATIRTMLHDAINSKALGKYERRKLKAFFQLTQDSEFAYALWGVIKMDMSLPLSYCSLCVTYLIIVVQFSRFID*
>PbraGR28
MSKPEVRVNSFFKNRSYCVDPISKFFIITEMILGLNHLALFGNIKSIIIKIGYAYSIFVLVVFNYFMFVNNVWSVPLTAYNCSYFLTIVECSLLWKRLRNYFKQLSLFDTVADCEIILSRTSKYNLVQCIFSVSCCLSILTLEQICYGLNWSGIVFLPMRLLHIMRFYFSAHLFYSLVIRMQLVNFLFESTFPNGETVRLLDKAVKFKFHKYFELTRLIDYFNMIIKAYDTLNHAIKWQLLSMFIELFIIAMTDLYFITMELLTKKFVVDGTLMVASILTIQLIPMLSVCMSGDRLHKEVLWLREMLACRLYEGKLEKRERRPAQALLTLTEARNLSFSLFHTFNVDISLPFKMFSLLITYLIILLQFEKVKNNLQGKPILLD*
>PbraGR29
MFLKFNASVTFRTVMYFRLLFGHFFDSTSNTIRLIRQLYCVAFAAVMIYNFIYFVEKNPLMPSFYLPLEFFINFTLSMFFEGFIIEAITSVADCGYQGTLSYRIIIYIVIQILTIIATVLLKNSFTFTYYVIHLLVINISMVLSTIPKILFFDVTYERMKSLRLAFESTNLNISVIGKNQVEHKIFDVKSTFSAYKTLLNQCHKTSKQMQIGMLGILIADYPNIVLFLYQIIIVYYESKWWMMTPLILKIVNTLTLLFTPAILSELINIEYEKTCDVLRRKIAACDDVSLREYKQRAYDYIKMRPYKFFIVRAVSLDVSMPLSFIGFCIGHLIVILQNKNSNYELVN*
>PbraGR3
MSLYTSNVLYPKIPNGWAHQMENKPKNKVIFLDVTPARTPYKVRPTSKNSVLPLKDNLITPEIYKDIVYENIKPVFTLLRMMGVLPITRSSTDKNQFNIASPSMLYSVFLYLCLIGYVLYLSLNKVQILRTAEGKFEEAVIEYLFTVYLFPMLAIPIMWYETRKIAEILNGWLAFEMAYKTLSGRILPIKLYKKALAIAVIIPILSTTSVIITHVTMVHFKMMQMLPYIFLEILTYILGGYWYLLCESLSVCANILAEDFQKALRHIGPAGKVAEYRALWLRLSKLARDTGIANCYTFTFVNLYLFLIITLSIYGLLSQISEGFGTKDIGLALTACCSIFLLFFICDEAHYASQNVRTNFQKKLLMVELSWMNTDAQTEVNMFLRATEMNPSQISLGGF…
>PbraGR30
MKPHTLFNIFMYLRLLLGNYFKSDSSQISQILKKIYCSITGIVVLHYFFNFHDIDPLTPGYYLPLEFFVIFFLSLFYEDSIIESISSSKIIDKLVGFQGPISYRILIFLFLQLLNICLGGAFHYNYFCSESYSKFLLFIIYLSIALGSTPKILLLDVLYERMKSLRMSFEHEYPIVNVIGKNRTNQKIFHLNMCLCQYKHYINCFDRVSNQMQIGILSILVTNYPNVVLYFYQGIVTFYKDGLTLFLPLWFKIQYTLILLLTPAILSELISVEYDKIRETLRKQIATCTDECLKEVQQKAYVYVKLRPYEFVIGRAISLNVSMPLSFIGVCIGHLIVLLQNKNQRYKNS*
>PbraGR31
MKTLKRFMFYRMLFGYYYDFRSTKLVNVYKRIYCAAFVLVISVCVCYNMTFNITNSVVYTLTEFYFLIIKSFFFESKIEEYFYKILKLDKMFRIEHRIISLKMYFIFIFVFLLQWVVFLLNSNESYFIFLISLSISISYIPQIIVFDVLSSRINILRHTIPCKYCFNIRRRDKILYKIFCLKKCIIYYKELLNNINCIEKELNITLLISIIVNYPETLFQFWNFMVQFLQEDWTLYDAFSAFCPAVIVILTLTITAMLANSICQECKNITNILLDQYIPCQDKMLQLELHRALYYMTYRPFQFCIIRAIPLNIKIPISFLSVCISHIIVAIQFYYFNT*
>PbraGR4
MKAQRKIYINTSKREDDFLPTATCMFAFAKTFGIPTYGGKVALIMSITMLVMLIILEISSIWKLVRTLNGWNQNPNGSVIARLSGSIFYGNGLLSMLITWKLARKWRSLSKLWLELETKCSLHFPPDTKIRKRLLFVAGYTVFCAFVEHMLSMMSSTGLDCPPQEYFERYILSSHGFLITKREYTLWLAIPIFILSKLATVLWNFQDLIIILISMGLASRYNRLNVFLRRLVMYENEMKAHNLQQNLVKRVYLWRRLRIAYVHQSQLVKRVDKCLGGLILLSNLNNLYFICLQLFLGISQAKGTVINRIYYFYSLAWLLFRASGVLLAAGDVHLHSQKALPELYKCDSAAYNIEIKRLKYQLQHQIISLSGLDLFYLSRQKLLEVAGAIVKYELILLQY…
>PbraGR42
MEDLTKDILDEEFIDIFRWLHLLQNVLGYSRVEIKDRFVTPPKKAFIVYSFIMWTIIIPASTVYYTMTMEISSVDNMMMIYIPYQYAVISCIASYLVYCNHFNKSDLNCRLFLKLQKIDRLLGSAFVKNNKVLSIMSNIYALSYFVGSFIWLIFLSKIHHTEGCFYLTCFMLLTPIAYSAESVIFILKLKYLIVRVEYIANELKNVHKTLMREDLTGLGLTERHSLTYEEQQPKANKLFINENFVRGIHAVLSSMLDMEEIYRHSVRHFL
>PbraGR44.1
MSNTEYLSKDILEDQYIRSFSPFHYIEVALGTSRIHLRNRFVTSPTLSQKVYSLVCAVLTCALHIYVTITYFEKYYKYPIIYYTFVSLASMHFLTFACNIIHLRFFNTIENQEFYVQMQQLDRLLKVHDCLNNMQYLYNIYTVVASTLILFITFICGVFLHYLLAIGFIGVIYGVLCCALEWMHCASLLIYFYLRIRYINAIISNHLEGKLVLTEIKHFRLPRRSLLRHLASSVHDFESSPVDLYVEALFDAYSTFQNLYRFQLLLFVGNFFIHCLLSFFVEILSAQKGLINRETWMEFTDMPAISLISMLTATAISIRCELFLREVMRTRRLCVNVLARHYDGVIRDKAKRILRTLDARPPSLSVYDMWHMHAGTLPAVTNILTTLMVAILQFVLL*
>PbraGR44.2
MAKSEFLSEDILDEEYMKAFEPFHHLQMALGSCRLNIRDRFVSSPTTAQKIFSICCVTITLVLYIYSIRSYFIRYYEFTGIYVTSIISIVLYYLTFFFNIIHIRFINCSSNPRFYIKLQEIDRLMNLNKNEKFNNVLYWNNVISAGASVLVLLMAFCLTMYENAQYFMGIIGLLYSVLTCNLEWLYCADLMMYFFLRIRFINAIILNHLQGTVGPFKYKAINLPTYYFIRCLASETHDFQTNCVDLYLKAVFEGFTSFQNHYRFQMLLFCNQFVLLSLLTFEIGLGALQYNALRWSEIITLPTILICNTLLAIFLCIRCEVFYRETKKTKRLCITMMSRYCDGPLREKAKRILKIIEQRPIKFNVYNMWSMNAFTVIRILNIVTTMMVVLLQFTFL*
>PbraGR46
MKIKTINLVVKLENVLCIYRNYNFFSRRNRVLTNIQMFFELSLTIISTVLVLSHLRSQSKFATYLLTHVNGLIIILSAIWYSKSFKKLIEYIEANQFQFSTEIDYINILERKYKALKIMLICYGILSTIFVVFLRSTAHYSILDIQFFIVYINLRISNVRYILEYIVMYSILSVLTMHVNCISRWVEEKVKFYESKVENEIEEENGNESCFKQWTVAYTNIKESSNLFNHIFGVQMTVILVTAMLYFIIFLYNAASIGVAVSKRDIIIIVLKIKKAVAL
>PbraGR5
MDIIRERPTFQNAMKLTILIGQFFGLNPVYGITNIDTNKVRFSYISVRSIYSILTIVGQFVVFLLCTMYIIMFSDTSLHSITPMVFGSSNCITTILFFRAAIKWPKLMNYITKVETIYPNIDGAFVTKCNLSCIVVLTLALVEHVLADFSKVIYVMDCPNDKFDTYGGFIMHSFPWIFTVVEYKTYLGIFVQFINIQCTFNWNFANLFVICVSIYLTSRLEQVNRKILEAKGKFIPNSFWRNMREEYNRATSLVRRLDDVIGGIIFISFANNLFFICLQLLNTLADGIKALPSCNNGDDKRPLKGYEQAVYFMYSFMFLVMRSLAVSLIAARVYSASKKPAFALYEIPPSMHCTEVQRFLDQVHGESVALSGLRFFQVKRGLVLTIAGTIVTYELVLLQ…
>PbraGR52
MKITKAKGVKTFYYGNELLLPNQPYHDTFLQFMNTIFKWARCFGVPGLSSMLWRIWAAVVLISLALTECGAIWKVIRALAGWARDTANHRSVTARFAGAMFYAASVISQILCWRLSYRWRALSKYWASVEWVLNIKYVPPDHSLKKRLLAVTAFMATGATVEHLMSILATTGIDCPLSDILKKYVLKSHGFLLLDQEYYKMIAPPVLFVSNVATILWNFQDILIVLISMGLTSRYRRLNMCVATVCSELNKERKWSKDNEILQVYLWRKIREAYVKQALLVRKINSAFGLILLFSNFFSFYFICLQLFLGITQGFTGDVFQKMYSLVSLAWICVRTCCVVLAAADIYENSKRALPYLYTCRAQFYNIEIERLQDQLDKDNIALSGMGFFNLTRTVLLQV…
>PbraGR54
MKFQTTSYKNMLNLFQPVIIIMFICGYNFKTFTTTLLRKVIAQFYSLSLIIIVSYSTMNCCNVINPSQFMSLLEYDFSVLNSMIYNSKILKFISDLKCLDGYLRINKRHYKIIKFRFFFIAVTLWIIRIIYTTLSCVSSNCLYSFFLFTLNIFSSLALDLNRVWRFTILNTIRFRMKLLRQRIEENPEENYYLYAVKMKTVKEDKLKFCLFIYRQIGNMLDLIQPELHAQMFVSIICGIPKLVVDIYHILLVIEEHEPKTALGFTVMHIIHVSFLLMSPSVVIELFQVEIEKIRLHLIHQIIDSSDPKMKEDAQIFLQYSVIRSLKSKLWRCIPINIALLLEILNICYSAIIVIINFTDLY*
>PbraGR6
MKNTSYWMPIKRNKVDVSELKPAKSPATFRESLRATLIIGQAFSLIPVIGVFRSTSGVRFTWLSWKFLYLFLSLCGQSFITIMCIHKVVNSQTSLNGTTPIIFYSTTCITMLMFLQVARKWPDLARYAAKIEDLDPNYDTKLTYKCNGTCAIVLSLALLEHILSLLSAFAGAMVCFPDMSLYEGFVKHFYPWVFNYLPYSPLLGFMTQFLHFQSTFIWNFSDLFVICMSYYLTSRLEHVNMKLLAAQGKYLPEVFWRTTREEYGRAAQLVRKVDDVISGVVFISFANNLFFICLQLFNTLEHGIKGTSECRNSRNQGSTVFGGYEAAIYFLFSLIYLMARSIAVSLIASQVNAASNTPAPVLYDVPSPVYCVEVQRFLDQVNGDKVALSGLQFFSVTRG…
>PbraGR61
MNMSIVMGILYFRLAVGNYWECSSSKIIQILCKCYCVAYISVSTYVYFSIGFEADSLKAKYDVNLFSFLIINGGFAIWNKQEYFTRFHSGIRTIDNIIHFTKSKSVCLVAYITLMVIKSGFNVTGHILLQQRFVPFFANEMAEISKTISNLPSVMIYEMLWSRMAFLRKWLSSKLKHGNLDEKQFCLRKFLHLYKTLLDNVTKVYNILVMQAFMELVYYFVTLLADVHSAIVLVIRKGTWDISLSILIISSTNFLLLLLGPLFLELTLKEYEQLLSLISTELMQSKEDAYREQILTTLDYLEVRPPRYTIWRIISMNLKQVVTVFDLLVTYVIVLLSFQF*
>PbraGR63
MIPKHRLPCVEDIKKSIGILNPFLRMFSLKCDTFKHKKYTVLSIVTFILPALILGSIDALTLYFKILYTYHDVVVSIKYTDAVQVTFDFFQYIVDLYIVYRCGNSLEEYYKIYEKLDEELGMKYCGVLYGKLRKIILIYGFIWTISCAGDYWAWLDSSGWKTASAFSISYIFVLIKIITSLDMTAHLMHIDFRLRAIGDAAESLCKKLKCSYRERVGENDETSVKIITVGTTNSNVEVVKCLGRCYVWVVKLAEFVNQAFGTRVLLNTLSVLIDIIRFTNIAARILLGSQHLHKHATGIFPVLSTLMRLFTCVVMVFSLAKHCELVYGQRERVINIIDHAIVFNEPSVDVKSALNDLRVLIQYRPVEFCMSNLVRIDYSLLGSMTSIVVTYTIILLQNV…
>PbraGR64
MFSFRNFSVIYWILAIRLCFGHFCELSTSKRINFVCKFYCIVFYAYQFYFLYNISFYASTHLYLQVILLSLKSISNALISLFFKESYFLKYCEAVDTIDKVLRFNVKYTICAIVLYVMSIICFLISPTFMFTLSSKGFFLEICSILVADISLMLSYVVISLSYEMFWTRMKLLKDYVRQYIHNGDVTLEKKNFHLKQLTHVYKSLLDAVKDANTALKIKMFTDTIYIFSTTVTETHFHIVALISNGFSWDLILPLITVIAHIYLTFLSIIFLELVLKEYEEIK
>PbraGR65
MFNFNNNLSIKFLLGFRLLLGQYCEFKTSKIIRVLLMFYSFVFHMLMCLVLQTYFDTIKPKEMVWCIKLSKILQPVKVIANLCLSLFFKEKYFLIFYKNLETIDKILKYNKKFDVCITIGIFFVIIFGQLIFQMVINNPVDITYMLEKIVDIAIFSEFNNIYEMYWQRMKYLRMFLQSKCVLSDDVIIKIFHLKKFVQFYKHILDNVDKANRAIKLKMFLEIIYSFLKGLLDISYGIKLLIKLDLYPLNVVVTTILFPILNLGWYLNGVIFLDLVYDEFENIKTSLAMEQLKCKYNRLHEEIEIALEYFEIRPPRYSVWRIFPLNFNLITEFINYSVTYIVVLLSFKLSLK*
>PbraGR66
MLLRKLLGASFFSLKWSRDRVVATFSYLGFVSFNVWYFLYFWSMYNVFIGDQTILRILFETKIRQYGDLVENIVITAYVVYTMWKISYDLSGSTEHIQQIMEIDAEIEKLGEKIDYSKSATVSLFVLISHFVVCFIRVLVVCISMGNRKASLHYSKLFQITFSDSLSFTVTNYFCTYLYALRDRYKRINQVLMGLGTRTDKNLFVRNKNLINVYRMEDRYVCKKINACGKVYSMLFKASETANDKFGFALLLTMFVWLIMTVLYLYYFMEATAAGLFHDVQRYIYFLVYVSWQIIFAVAIISSAIYFCENIVKEAKLTSYLVHTVISDTWDISVKEEALRLSIQIVHQTPKFTARGLFIVEYELLLEVGNYIKLITLEQLVSLWQ*
>PbraGR68.1
MISALRFLPLRNMEQIEIQDVLTPIILTGSFFGLIPNSVKFSKAKQSYKIIPKSIFLNILCVAFFITLHITFLIYHIYLVFYIEANSDTSKKLNFAMELVNFLIVSSSIYIYAYVNRAKYLKILNMIVSTWSGIPQSSNSRKILRELYVATNMILIVIVILILLQIYLNTNQANIMQKFVVGITLNMPQVIQFCFLAFYTTQVRCITVILARITEHCKSLKVSDEANMSIRQMEMVYMKVFEIKMDINKVFEGPILASLFQSFHALVNEAYLIYYAELHTSDTSKATVYNNAVWITCQFIKIYWLSYSGNTLKAEALKIGEALHYMSTEGQELRWMMEVQHFSTMLKYQSMDISVFGYFSLNASLMFNMSASAMTYLIIMVQFA*
>PbraGR68.2
MLPSCEYKREFNNDREEIEDIIKPIIITTTLFGLIPISINFSKIKQIYVHIPKSIYLNSFRCVIFILLNIVFLIFHIYLLYATAGSANFANLPKRMNYLFENVNFLIVSVTVYVSGFLNRYKYLEILNRIIWTWTKMPPSNNGKQVLKKIAVQCYIILLGIMVVLLFLIYFNSKQDDALWALVIGMSLHMPQTIQLVFYGFYTVLVILLAAVLYRITEHFKSATQSISIIEVRPKQRYLTLMEVRSLYIEVYEIKLIIEQAFRAPLTYSLLQSFHSLIAESYFIFYGILYSKDIPTFLIYNCAEWILCQVIKVYALSYSGSLLKNAASRFAEALLALPTEGQSIRWFMEVQNLSTLLKYLSMDIKLYGIFSLNATLLFNVFASALTYLIILAQFAE*
>PbraGR7
MFIFRFTWKSINAISSLFIIILHILYLSIHSYNYTFQEDISFRHTIRLIDHMTSTLAIIIFIKSSFRWKTFLENINKCESLLKSLKNSKKFVKLSKRIISIFLISHVVDQALHIATFVNFIHNCFTLSLSEEIKLYFITYFRKHFVHIPFNPATSMIFQFLRLQLNFVVNGMDFFITAHTLYLAMFFRNFNRNMRRDPVRFAGNKMYWANVRMQYTRLCHLVTNIDNVINPFVLISLLANLLKNCKLIYVILINRDFSDGRSYSTQCTYDYGESTLDYIQQYYALFYSIAKTWSTLAAMAWLHKLTRIPLDALFEIGPNDYNIEMQRFMDQVHNSMIGLSGLNFFVVTQSTILTFTSTIITYEIFVLQLMYIYE*
>PbraGR8.1
MATDGSCVVNGSFLFILRVSRVFGLAPISFKPVEDGCRIELLKSSYYEYVFLGMINVLQIIFYFHNLVLWDIMGKFHVILFIIKLINWLPLLMFLNIAILSSKTRMRVFLERVPINKTYNAVKERRRYTLITLFATLRIVLCSLPFIYSTKIEVTVDFFLGVFFQFMLTVIELNVSFIKLELHKYLETIKIELAAITADMKSDMKTKPQMSDIMISLRALSKAFVTICNICFKYNDSENLLALALSSSCTLNLIRTIYNFSRACTATDVDHKSFQIFLEFSSLVLHLFRIVLYVDSSSVINKEVDKIRYQLAKLSQLVTSVGMITPLEADIFQFMVIINNPVLNPMGFFTVSRGLIGPILSTVVTYGIVSVQIG*
>PbraGR8.2
MDGSCVVNGSFRFLLTLSRLFGLAPIRFYPVEDGFRIELMKSSYYEYIFIVFLDSIHFTSLFFYIISSEITEDIHVISLVLRILDWIAQTMFLNIAILSSKGSLGSLIDCIPINKKSNLARERRRCLLIMLFFLIRLGNSFLPYVFYKKFEVAVFARYFLIITIQVAQNLIELKSSFIKFEIHKYMETIKFELMDIIVDIKSDKKPKPPMCDICISVGALSKAFVSTCNTFFKYNTKDNVLAVILSLMFTVNLVGTVYNFAVTFTSADYEYEIMQSCLEFTWMIFHIFRAILYVEASYQMRKEVDIIRHQLGQLSELVTSDGKATPSEVDIFQLVVLGNYPETNPMGFFTVSRELLIPILSTFFTYGIFMIQISSILTKSNDIKH*
>PbraGR8.3
MGGSCVVNGSLMFILRLSRMFGLAPVRFKPVEDGCRIEPLKSSSYEYIFIVFLNGIYFTFSYFQIISPAITGNISVISLVLRTVDGTAKTIFLNIAILSSKGSLELLTNCVPINKKKNLGRERQRFLLIAFFTLLRLGCVFITYIFSRKFKVDIFTECFLNIIILLSQILIELKTSFIKFEIHKYMETIKFEVMDIIADIKSDKKPKPPMCDICISICALSKAFVSTCNMFFKYNTSEDLLDVTLASMFTVNLVGTVYNFAAAITSTDYEHKTVQSCVELAWLTLHIFRAILYVEASYQIIKEVESIRHKVGELSLLVTSVGKATPLEVDIFQLVVLVNSPETIPMGFFTVSRELLGPIFSTFLTYGIVIVEISSNLHLK*
>PbraGR8.4
MSPEPKVSTWQKYYGLFIILPWIQIIFVYSTYREIIHIKESSSHISSLLYIIYTTSSLLCVNFAVWTAPTRIYSWLLCLRNIEKIIVRAKKTEEKELFRCILLTVYFLTIFCCMITHSLDMCRQLNKLSYICVFYKVNMSFFHGMCTTCDSFLFIILIFRVHTATKIMNEELKKLLHEGDVDKRPILRNNYMIGSSFKAYKRSYGAEKVRELTDAYMTISEVIKTVMETGEVGIFLYIMSKLVRLMTRVYNYAHWQFAFQDMTFDYHIILSSMMEIFWCTQTVVKSFLYCEGPHQIHSMLQETQDLVSKLKKKYHEDNISNELHLFLRLTMLSRPTFSPLSVFTLNRGLVAKILGCTATYLMAFIQLEINETSNK*
>PbraGR9
MEAETEASFSFPPEGPRAYHTEGECTVGGAHAFILRISRVFGLAPLRFEARGESWAVRVSPAASLYSYILVTALVAGTVYGLCAELRAGTAASPRMASQTAQLVSACDVLVVTLTAAAAVYHAPERMRIIIAFMDTVADVDESIGAHFSRARERRVSGVMLAILVFFTLLVADDFCFYALQAKKIDRHWEVVRNYGGFYLLWFVVIVLELQFAFTALSVRARFRALNDALALTADHLCRPGNYFPVEKTNQGALNVFAFHVCARSRRHTAPDTRRNHLIVRRERGGHCGQLAVPAGEALERLAVLQGALCEALHRLDAAYGLPLALLLISTLMHLIVTPYFFIMEIIVSVHRIHFLVLQFLWCATHVLRILVVVEPCHYTITEGRRTAELVCRLLRAAS…
>PbraIR1.1
MLLVFAKTLSIPLLLWIFIGTAAAWDLRFVLDYFRRRDVRHLSLLHCTSPNDELTFGHTFIDNNVRISTCSINKDITKIENVLRRHSVPVGVLLNGACDNTYNVLDKSSKSGLFDASHIWLILDHTSAARNMTIDDMFQQMNLSVDSDIAIATVTGSHYELTDIFNFGKIQGNELERKILGTWDQMNGLKISSKSFKFYDRWDFHNLTFRVVTVVVGQPKTFEPDMLTSLFYTKGISVFTKTAAIVLDVLKEKHNFRFNYTVAGRWIGPPDKNASLAVTNSLYWGQQDLSCTSARITSERLQWVDIFNPPVTQIESRFFYLIPNKGIGNYENRFLTPLSPAVWWCSVGAGIFCVAVLAVAAVLERRPRPAIYAMLSVLGAVCQQGYEEGTGIVEHRYSC…
>PbraIR1.2
SSGVALTYINGKFNLYLFVRGTMRFHIVLLYLAKFSFAFSQESVEIAVSYFQERNVKTVCLLSGSNHIGIRFAKEANKHSITVLQYINNDTTKSSCQRQVYTHTGIVLNTDDPPFQDVLFNASENNIFDSNRIWLIFDENNSTEINTIYSILNLSVNVDVTIAQRMDSGYTLYDIFNFGKIQGGNLLKEIAGHWSQETGLIVKKSFKYIRRFDFQRLALRLMIVYQGKPEEFRPEILLERDVAPGISIVTQTSGMILNELATIHNINFNYSICDRWVGDYKRESPNAVTNSLYFKDIDITPTLRFLPSHMDYYDVIHQYVTYAEGKYFYRIPTTGVGKFENQFLTPFTRDVWFSVIGVITLCGLGLLLSAKLENRPKSGHYAFFSVVALSCQQFFEDID…
>PbraIR100a
MTLTNHKDCIKMDEWTMYLKIGIFFTLISVGCGFEILKNNHEDNKIDTLTTIIKENFVYNGRHTFLLIGMFPDQFYSKLKHLPVTFTITDINKEDAQIEDVVPYPSNYIAFSCRSRNEFESALFKVVTLPYWHPLAYIILVYQSSYDTASVAQMFYAFWYFKVINVIIIHFDDLQEKTYISHFNPYTSSSFELDHIFGCWTVKKITMPISDLDGLICEQGCHNVSIYSKLRSNNLGTCLSFSTSVLSYKTPETVKNLILFEDKSANYHNYSMNSFAIQLDPFLNIKADNGTYTLHKRDGQIWNALSKLMNFSIDITMNEPIWKHDFDYITNLQEFVSFTQRKKDLVILPMYQFDVMVVELDNTVPLQDSGVCFMSHRAGFETVVFDLKLFKNNIKMIVE…
>PbraIR100c
MLSTRTIFLLFIQFTFSRPFIIDSEDNKTAGCVRDIIQKNFEFKSQITVINGDNYEILPTINQMQYISVQILTSTSHKFTLPFNREYLIISNSCDDFENKFHRITIATTWSANAKLLVVLENAYDPRCIFDILLKKHMTNVIVLNDTATLELFTYNPYDDFGCGKRYNRIIKLGHCKGQYLFFDKLNTDIRNCTFQALSAHMPPYSIDPATNQSQYKGVEQYLLEIISDKEAFRINFTFKINSDEYTVIADNMSAVGPLSALQTGEADIITGGMLLTYQRAMVLGYLTGGVTFTDYLQLHVATAKPVSNLKNIYSEFQCWIWLALFIVFIVYSVLMYLIMRKRPKQTITLKMFGFFLQQSSRVKGDRTNRLFIFWIFFAYLINCFYQSSIVSFTLHPHL…
>PbraIR100d
MKSQFFLIYCVVTCYGDLELLLNANNISNKPDDCVNELISKHCGSHVSIVLSPSNIKFIPINSNCVTYVVRSYEHNEWFITTDIYIIYLKSLDMYNWELRYDEMWNPRAKFIIVISHKVTKLDLKKVFDKLLEFNLFNIFVILNENHTQVTFTYYPLRKGNCGNKFDKIVKLKSCYDLVNTLPTNFEDCSVNVLIKEHRKSTDEYLTSFDQYVLNLIANKIKIKFKYRFINTQIGGTLLQNYTKTGTMKYLQNKEADLVIGGYLLNAKRTIISDAIYAQNYIMVKSVLPCTNQHLWKIAFTAFKSDSWLIILNSYIFIVLAISLIRHIFGLKINHIRLEVLDYFFGHGGNTYFRIKRLRIILTIWIWYTVLITNFYSSSLYSLLTTITHRLRDTPNVSA…
>PbraIR100f
MYNCYLPFTISNTIKQSIVSRLTDRTKMSSMKVVLHLFPIILVKYRVLSFVNNSAILNKVYYGEDYLNSECVKKLITDHQCGIHITIVVPDANFQNFININSSCYDYVVVTYEPVELPFNTNLYLIYYNVNKTGSSFWKLRYFKYWNPTAKFLFVTTSEVQYPELKEIFRKLLKYYILNVTVLTQINKTQGSWTFYPLKDGNCLSNYDKLEYLGSCVNNDIFPVAKDLTNCTILVTGNKIVDKKSYINYIQYLEEFLINVSSKAIGVKLKYSFEDYDSNDGEVLNNYTSIGMLNYLQKRKADIVFGGFFLNERRASIYDFVSGYKYTSVKLLVPNSGPKRWKIFYRTFGMRSWSLIACAFISITVITMAISYYCFQIKHISRIPLHLIDYFFGHSDRNL…
>PbraIR143
MEMIPLFMYLLVYNSKINSQNSESYHNVLLSKCVVEIAKRDLNYKPTILINDHGKTKSNNDLFKTLVTDVHISGVPSTIINEYIWYNNTVENGDILIILIVNDCLDLINMHFISKKIKYLIIFEDQIHCQRFDTIKEMISHNVVITIKSNSSDAFTLSSAKFDINESTCDILDEVRLEQVNVCINGSLSRRNKVFADRSIVNLKKCSINTGIGELYPYMLLINNSRKYENLNSISEAEVRGSDVVILKILSDYLNSTLEFFFIYKDQENPFVDQAFLSLLLNGSLDICAGGLYRIYGDIVDYSGVYTRQSVVWAYSVEREIRSWQSFVTKVDGLYFFLIFYVIHVFMWKMICKIDKEMFSLKQTLLYSWGALVGASSLHDARSIKQKIVNGMYLIQCLH…
>PbraIR2
MNTTYTVGSLFKCDNLQTLMYKHEHDPIWRQTALGCYVLDILKDMLQFNVTYAPRLPPYTDDYEVPSASNSIDIYVRPMMFKREYLADAYPINFIFQWRFGFLLRYKRTELKTFFTLPFSTLVWTCLIWTLFLSASVFYLLSYWEKRLLGGERCLQREFLLAFSAYCQQILPLQANLSSRRIAYVIFILSAYVIHCFYTSTLLSHLVNDKDKGLNLEDLANTDYEFVIIKDMNLITEKHIQKVSRDKYLRIVEEKIYKSKVMDVYSALEAVRDTKTAVLTDYVTLYPVIKRLFDNQAQCELIEVNLYSKVKKYMFTSKTFPLTEQFKVITLRLKEAGLLTRFLQCDRLTISCNDIVNQEQAGLSCIYTPLMLLAGSYVLALLILIGEKICFEFCHLWPY…
>PbraIR21a
MNVLILLYSTCFMFWRVKGEIEYYPSMGEIKKNRDTQKLQLHTRFNVLQNSKYVKKRGADPVFHGHPKTREELWRERFLPKDKNVDQVLSLIRLIHNITLKYLTDCTPVLLYDKQIFSETKLFQDLLRSFPVAYIHGYIDDSNRLEAPNIIHAKDECLHFILFLTDVQKCHKVLGTQSYSKVVVIARSSQWAVQEYLANPSSRLFINLLIVSPSFKDDDETLEASYILYTHVLYTDGLGSSKPHILTSWTHGKFTRNINLFPLKMMDGYAGHRFLIAVANQPPFTIKRSLIDTASGAIKTIWDGVEIRIMKVLAERNNFSIEFVEPRELNLGPGDSVANEVASGRADIGIAGLYTTAERFREMDLSFGHSQDCAAFITLASTALPRYRAILGPFHWHVW…
>PbraIR25a1
MLLFVTFILTIFHYSFSQTTQNINVLLINEENNALAEKSFEVAKEYVRRNPSLGLAVDPIIVVGNRTDAKAFLENVCRKYTDMVSGKKPPHVVLDFTTTGVGSETIKSFTSALGLPTISGSFGQEGDLRQWRGLNSNQTQYLLQVMPPADLLPESIRAIVTKQGITNAAIIFDEFFVMDHKYKSLLQNIPTRHVITPVKSFSKDEIKTQLRSLRELDIVNFFVIGSLRTIKNVLDAANENQYFGRKTAWFALSLDKGDISCGCKDATIVYMKPTPDAKSRDRLGKVKTTYSMNGEPEITSAFYFDLSLRTFLSIKSLLDSGKWPNDMKYMSCDDYDGKNTPTRSLDLKTAFQEVKETPTYAPFFIPEDGSMNGRSYMEFTTDLSAVTIKDGASIGSKPL…
>PbraIR25a2
MLLFVTFIQTIFHYSFSQTTQNINVLLINEENNALAEKSFEVAKEYVRRNPSLGLAVDPIIVVGNRTDAKAFLENVCRKYTDMVSGKKPPHVVLDFTTTGVGSETIKSFTSALGLPTISGSFGQEGDLRQWRGLNSNQTQYLLQVMPPADLLPELIRAIIIKQDITNAAVLFDDFFVMDHKYKSLLFNIPTRHLITPVNSFSKDDIKTQLQSLRELGITNFFVIGSLPTIKKVLNAANEKEYFGRKTAWFALTLDKGNISCQCKNATIVLMQPTPDISSKDRLEKLKTNYNMNGEPEMISAFYFDLSLRAFLAIKSLLDSGKWPKSMEYMGCDDFDGKNTPTRMIDLLTAFKEIKEAPTYAPFFMPNGGAMNGRSYLEFTTNLSAVTIRDGVLIGTKSL…
>PbraIR31a
MLSMTFQSRKIKMFYEAISLAFRYKIVGSIIIFACSNKFDAAKIIRNFQDFNLPATVTCNAEIFQQIHHHRLQGVLYIPHNHNELDQVAPKYFSNWYKWIILADDIPDALNKVRYDADIILIKPGQYEADGGLEDVYIHPYLGASVHPWAFHNNSDLYVTYEKERILRRLNLHHYPLRIATPLATYSNDSYNGTFIDYLHDMSMPERDSGVRCGYTTSSLIVESLNASEILLPTMLWSTEIHNSSMLLKLRYGTADLSGGVLRIMHSRYEKLDYTMCIWPFRVGFTYLAERESSNNMFVAPFTTAVWLCCLALFAILFLAQRVTAKSVMEKEGAYIAVLATCLQQDASAVPQGISGRWTFLVLSICAMLIHAYYTSAIVSALMSTGRSGPDSLKSLGDS…
>PbraIR4
MILRFMKCLVVNGVAVALNVDKKPRFIIKIGVVTLSTNLARNTSVLAKHIKQLNAWELNSASSEWIIALKSIYDRKYIYKVLNTSELRYDQNIVVTLPHNLYKGNNILCANNFDICLKYHRNTTQQHFHSRNCIQPQKALRYYQSSNRFMNLARNKNIFRNGHLVPLHGSGTIYNYYTGRFHMTNASELMLKHNLHTKNETIHVVQYFKVRVNSTLYASHLGYWTLEQSMSMIKIPYPVEARNFLGEKLIVGRCNYTDEKPVPDQDGPSAPGLLDDLLHFLIVRMNGTSLTRYYSKLGFRTYEGAWSGLLGALLDHTVDIALEPVTEQVSGQQEMDFIFPIAETMYNIYIRNQETSSVRDIFLAPFSTRLLICVAMVLVVSAITIVIITNISRTFLKNK…
>PbraIR40a
MLPKDFSRAIVDLAAGLPTRAITIVRGNSTNISTEVIDNLIYALSKNNIGVVYMDFRANNSKSTYYEHQRKGLDTSEERTSFVLCEAYECENIISELTDINFIHRSTLYIFYWEHGAVSRKFCDSIQEAMRVVVVTRRKRVYRIYYNQATSDRLNHLSLVNWWSGRLYKNPVLPAADKVYKNFHGRVFNVPVLHAPPWHFVNYKNSSVNVTGGRDDKLLALLAGKLNFKYKYYDPPVRSQGSMISGNGTFKGVLGLIWKRQADFFLGDVTITWERLQAVEFSFLTLADSAAFLTHAPDKLSETLVIIRPFQWQVWPLVCATLLAIGPALWFVIAAPIYWQRRQRNMLQLLDECCWFTTTLFLRQTSNKEPSRSNKARLVSIIISLGATYVIGDMYSANL…
>PbraIR41a
MLLVPDFFLPIELLLQTLVDQYLNTSYCTTVITETPLKILPQISHRYILLNQSLGDLILDASEAGCSDFIVQISEPKRFFSALDYAIHRGLLRRSDRKIILLPSNNTEDNSLLDVLRMKESSFVVNLLLVLPSPSTHCETFDLVTHKFIGPVENDMPVYLDRWNSCSAFEKHANLFPHDMSKLDGKIVKVTCFTYTPYVLLDLEAEIVPLGRDGVEIRLMDEFCRWVNCTIEIIGDNGEEWGEVYENFTGLGVLGNVVEDRADFGITALYSWYEEFLYMDFSGYGVRTSVTCIAPSPRLLASWTMPLLPFSIYMWVGLLFTFIYEAFSLFVAQHFSAKKIFLTTFGIMITQSQNESNFKSWRIRSVVGWMMLTGLVLDNAYGGGLASTFTVPRYEPSVD…
>PbraIR64a
MHFLSNLSYWISLTDLSVIISIFKLKNVGNVILLHCFELQHFHQVQKMFIENNMRVSVSHINDISAHNWLYQYSRLGVIVDTSCNLWETSFSAFHEPFQSPLSWILKSDNFSKTKDILSQYPIEFNSDVNVLLNRSGSYKIYDSYNKRYNRKDSFILSEIGYWDGNLSLLTKRNKQLTGVRLQLTVVYPDPISNITFNHFLNLHKKSQIDSLHKLKFFTLMMYLRDMYNFTYNLQRTASWGYLHNGSFDGLVGALQRKESDIGGTSVFFRKDRSEVIDYVAETWGSRICFIFRHPKNPGGSFAIYARPLVNAVWYSTVGLLLFIGAFLYGLLKLNTFLRLGGSEDTTPSLTALFVFSALGQQGMSIHRGSTAVKITIFITFMFTLTLYQYYNAMLVSTL…
>PbraIR68a
MAGHLLFLLSGLFFNYGVCDIGSIIKDINIRKDLQNIIITVLNDLAKRNDVTCITAITDDIYLNVFDGGLFKRTTPLPFLTIVVRENEDLLSPNFDTLESISRAKDDGCNVYVILLANGLQVTRLLKFGDRYRLLNTRAKFILLYDIRLFHSDFHYLWKRIVNAIFIKHHKKVIGKLKSKPWFDISTVPYPNPIKGVFVPRRVDIWRNGRFQYGKELFFVKTSNLNGEILNVVYLEHVPSVVIMQQNVSNKVSGVEVEILNTLSQKMNFRPNLYQPINADVYKWGEKQANGSYSGLLGEMVSGKADVALGNLQYTPYHLDLSDLSIPYTSQCWTFLTPEALTDNSWKTLILPFKLNMWVAVLLVLLVTGSIFFGLAHFYLNLITFREDLKDSRQVNKEK…
>PbraIR75d
MDLSSFILAYFSSKNVSLITAFLCWSLDDIRNLQFRTRSTGLRLRVYISKGSVIPEMPAYRIFREGVVLDLSCPDAHLILNKVCIHKLLFMSNASVSRAFNLRHSWLLLPNILSNDTDIVDFLQDTVILPDADVVVAFPEKMFDVYRVKIEQPIAMLDIGGGYTNSENLNRLWATIPTAVTRRKNLGHVYLKSATIVSQPQYFKGWSDLNDRQIDTFPKLSYPLMMLLAEDLNFRYNMKQIELYGEQQNGSFNGLAGLLQREEVEMGVASMFLRRDRWDVLHYCSETVELVGAFIFRQPSQSAVSNVFLLPFSGGVWAAVGVAFAGGGVLLAVLGYVARRRQLPDDTAERLTLSETFTFAIGAACQQGSDISPEIVSARILMLFMLLSSVFAFTSYSAK…
>PbraIR75p.1
MNLMNILFLTGFNFIYGLDRSVFDIIGSFVVTEEKPTSVLIPRSCWKNSEIKVLSKIMFEVNINVGYSLQPNRSEYFAHNILILVDLSCQETNLFLIKASAQGYFKSPYRWLLLNTEGNNFDVLDQLDMPLNSDVVIANIGFDSTVFIEAYKIRDNSEVIFSTRGEWRTARTELNFNKPLTIYENDKDENRIRKDLAFGIIKNHRDFKILSRRRSNLRRYPLTMANVINDSNNTKQHLDDRLYLHQDSITKMSYMVVKICFEMLNATERLLFTPTWGYKDKNGNWQGIVDHLLKREADLGTLTIFTQERMKVVDYIAMVGSTAVRFVFREPPLSLLQNIFTLPFTGGVWMAIVVCVLSCALFLYIASKWEATVAMHPMQLNGSWADVLILIIGAVLQQG…
>PbraIR75p.2
MMNCRFVISFILLQNSIVYGKDTNTIDMIRSYVANEWTPTIVHCNLCWAKAAQIRLHKELGNVGCRVSSTMEPCSTRQDHNLLFLNDLNCPDAEQAFQITSLLRFPYRWFVLYDDMNNRTNENRESIKKRILDLPLLADSDFVLAERKRNIFLLTEWHKPSPNGSTYSHPRGFYNGSLQDLRPRRELYWRRKDIMGHPLTMSNVIQDSNTTIYHLPREDRLLLHYDPFAKLCWSHVRMAFEMLNATPRYIFSYRWGYIKDGQWSGMINDLRIGRADLGTNCVANSKRLEVVVFTDSIGQFKVKFIFRQPPLSYLANVFALPFSMTVWVAIALSTVLATVSVYFASKWEVKRIGLNSSQLDGSVGDALLLTMSALSQQGCSKEPKGLSGRIMLWVIFTAL…
>PbraIR75q.1
MQYKVLFLFLFLKSSLSLTFNEVKMTVDLVNSFNKPTAIFAFICEFKHKEIVQLAKLWSQHSLCYVLNSEDFNKFPMNKDVFIIVELNCPASKAFLQKANDTNKFGNPSRWLIIEQVEQLESYNFLFDSNVIVAEMKENVYTLFIVYKTHKHGPLIKESFGTWTASNGLNKTREIDTPASIRRKNLMGLPLAASIVISDNRTKNEIMTLRNIFVDTVAKSGYRQICPLYDFLNASMVIMYTDTWGYQTNGTFNGMVGDLVLGKAELAGTMIFITKSRLDVLEYLAYPSPPTTKFVFRQPSLSYQNNLFILPFRPKVWLCILGLIILLTTILLVNSYWEYEKLDNRNNYDQTVLRPNISDISIMVISAISQQGSSTELKGTLGRVVMFLLFFAFVFLYTS…
>PbraIR75q.2
MRGYLLIVVFIIAKKCSAEHLNTDLILDLRNEFGKRYSLVFMDCYKEDELREMSLDITKKTNEPITVQIMNNKFNNVKQNIIFIADVGCSNIKQSFITDEAKKLFRPPFKWIFLNKQQLNLSDSVLFEAGNVHLDEDIILVTKRKDIYQISFIYKISKASNWKVERFGDWSANFGLKKNKEWEDVTSLRRKNLGLNTINMCFVLTDNDSVHHLTDGENDHIDTITKVNFPTMNHLLDYLNASKNYIFTDTWGYKNNNSWNGMTGYLVRGEVDIGGSPMFFTSQRMSVVEYISSPTPTRSMFVFRQPKLSYENNLFLLSFHKYLWYGSVSLLAILFIALFFITFWEWKKIRLENSMSVDSTVLRPNVSDIAILIFAATCQQGSHTELKGSLGRIVLLLLF…
>PbraIR76b
MAGLELIFSTVCNATFCGTIDDNPLHDVKPERHQLENFVNGKHLRIGTINNYPENWAERTENGTYIGRGVAFDLVYILQKKFNFTYEVVIPEGNILYSDDRPVESLIGLLTSKRIDVAAAFIPIIKNTDKFVTFSTVIDESNWMMLLRRPKESAAGSGLLAPFDENVWILTLAAVLIYGPCLTLLTKLRSKLMPEEEDYIRISPSFWFVYGAFIKQGTSLSPSANTTRVLFATWWLFIILLSAFYTANLTAFLTLSKFTLDIETVQDLYKKNYRWIAPEGGAVENTVKNPDEVIHYLQKTVATGRGSFPSFRDSSSLLTYVSEGAVLVHPSVSLQYLMYNDYLQKTRLGVPEAERCTYVVAPGVFMTKRRALAYQHNSKLKSLFNPVIKRVIHSGILSH…
>PbraIR7d.2
MTFIDRPSPDNCSVFDTLAISAAEVALNNFRWQYASLILFNPAFFCGVNVFLKFYQKSIIIGQSTFNPWVVENTKQFVLFISDLTDLLDFLDWLKTQRFNNTGKYLVICNTIAGWTCDESIAVNLLWEYRMANVIFIKYDEFQEPIGFTYIQDYTCRNGPPIEVNNWATCIRSKNSTKCQDMFPIKFKNLHRCPLTVSTFEQTPFMMLGNGTPTGADGDLLRVIIKALNASLIMVTPKLGSGWGKLEENGTWSGSLSDVYYDWANFSMTSASITLHRYRYFQMSKDYRTVTIVWITHPSNPEPSLFKLLRPYRKEAKIILCLNFIVIMIAVAIFKSKYWTSIRNKFKINDIPDGIVFYSWEICVGLPASKLPKKWSLLYLTLLWILHCYLLRTLYQVYL…
>PbraIR7d.2.1
MFERYPIEEIIELMAQNAAQVAYHSFKWQYTTLILFNVSCLYGLDVFVKLYDKNIKIYNVMESVPDLNSVNQFILFVADVADTQAFLNLMERQNLNSNSKFIIICKHSNECDEAEAVKILWTYRILNVILIKNEDFFIRGYTYFRSERCDHPTPRRLEHWDKCIDSSKKVIKLCKKHMFPEKFRNFHRCPLIVSTFEQRPFMYINDGVPYGADGDLLRCIVHTLNATLVLISPRDDDGWGSLENHTWTGSLGDVYNDLANVSMTSASITFNRFKYFDMSINYNTLDLVWVTHPSEFESSSHKLLNPFTGKARVLFVVTLMIPLVIHILLKLRFMDKIKTRFNTGLSSDYFLIYALQICLGFSVTKYLKNFYKHVFLFWVWYWFFVRTLYQVYLIHSLHT…
>PbraIR7d.2.2
MSYVLEKDIIESINTDKLAESAGYVAYHTLKWQLTTLVLFNATYLYGVGVFVKVYGKKVKLNTISKSMKDNHFVENTIQYVLFLNDIPNIVLTLETLKLQQFNPNSKFIIICFDENECDENETILMLWSYKILNVIFIKYEDNSVSGYVYFPNEDCDHPTPERVQNWEDCIHSYTDSKQVCTTRSIFPLKLMNFHRCPLIVSTFELYPYMTIKDGIPSGTDGDVLRITGEAVNASLVVMSPSDRMGWGYQINNTWIGSLGDLDKKLANLSFTASATMNLERYHDFDISTSFNIILMYWLIHPLRLESSSVKLLKPFTTGAWCFISITFGIFVLSHYFIDHRVWRILSKVKGIDKFSHYFIAYTVQITLGVSVTKYPVNFCKHLILYWIWYWFLVRTFYQ…
>PbraIR7d.3
MLILLALIIVIKHSSSTEVHKTAAVIANQEFSPNYPTTVIWWETAPENIHHFTKEYKGLVVTLSLNYTNENETLTREFVYDQTVIYVKHVEEFSLILKMVKPSLEPIQLILVLIEVNESRITNLIQVAWKNEVAQIIIVTTNKKKDINLYTFIPYTPGDCGNITPVEVPINAPSFSIRKFINFNKCPLTLSAHTSMPYIKVIKENDKIILSGFESDVINLIVERLNASLVVISNEGQERDNIANDSLKVGFSDLISKDADVMLPAVFVNEKRYSVALTTYTYNDLTIVWIAPKQRVIYAWANLILPFISRITPLIILTFISFIAVVKLIIRFGRYHEFKEKTVIFQSFTILLGLQTKFETKCWLNNTVHVLWVWYCFLIRIAYQGDLINGLHKVILEPP…
>PbraIR85a
MKLEIRVLWLLPCFSLCLKPNSTLYKEIIEYHNETFFKAEYAYEVVTKIFNAYKQWFFTITFCEFTYFENRILKYIENYGDGYPVMLLNGCPDTNNTKVKPKINKHGQTAYVVTSNDLSIDESEFAIEAFIRTGVFQPRAAVIFVIKTPVEVDSYFFYTMKNHFELLWKRRVTNSVLVSWSEGLRIFAYNIFYKEIKDITAVKYVNEIFARQFDDLFGHELRISVFRKIYTNNSTGAIDCSSRLVHTVVETFNATCKPLPPRDGNTVGDLLENGTATGVTADLMDGYSDLELNSRILKTSYYGYIDTTYPLVQDELCFLIKKSMKQSTFTTTLKLISTEMLALLMCNVVLFIAITLMVRKVEIQLWQLNDNRTTSETILDLFKCFIRQTVELEFSGQIF…
>PbraIR87a
MISFVFRYIILASTMYTVLNVNPLLMPNGLDESVKASQCVLKLSAKYFVEKKALSGSIVIVGINAQAFTKKFLLQTVHNGIEYSIMVKTPYYPHANASHFREKAKNYMMVLENQLDLKNYLKLLSKLPTWNPFAKTIVLYEKQKNEVSENLAKLFINELHAMKLLRVIVLIYSVLDDEIISYSWNPYSETNCGGKCESVYILDRCKDNLISQIEHQKEMFPLDLRGCPLLTYVVISEPYVMPPVRKVTSELWNDAYEFQKGGEINLVKIISQFTNMTLITRMSENGENWGDIYSNGTATGAYGLLRNDSVDLVIGNIEVTRTIRKWFNPTVSYTQDEMTWCVPRARRAATWDNVFTIFQRSTWLATLICLMTVSLLFHLMNYKENEGKVSKWPTNLILK…
>PbraIR8a
MEIYILFIFIFLFNLCCVASEASLKYIFILEKHDVDVPEQIATAIKTIEKSKPGLRVSDDIIFLDRENEEDAYNQLCSSLSKGVSSIIDLSWASWEMGSGLPIIRSTLDSQDLITAMNSYLESRNATDAAILVQSENDVDRTLYTLLGKSNVRVWVNSGLTRDSARSLSRMRPDPSFYIIAGDRNFVTRTYKRAVKEKLVRRDYRWNLVINDYEPFDPAVLVLPSVILQIDTNECCKLMGVSDCTCPTNTQRKQLILTNLLQYISETLIKLNVGLTKMTCNENNNDTIDQIVMFQNGGNESMFYWNDEDSSLNLRTPFILSTFKPNEGLQRAASWSSNEEYKTLPGFEFEPLRDFFRIGTYPAVPWTLPKLDPVTGDAMHTEDGQPMYEGYCVDLIEKI…
>PbraIR93a
MQLWFVILCLLGRVAAEDFPSLITSNASIAIVLDHQFLKDQYQGITDELKDYIKELARVKLKHGGVVVHYYSWTAINLKKGFLAVFSVTSCEDTWSLFKRIQDEQILLFALTEVDCPRLPSNAAITVTYSDLGEELPQIVLDLRTEKAFNWKSAILLHDNTLSRDMISRVVQSMTSQIDGKPSISVTLLKMRHETNEYLRRKGIYRVLSKVPVKYIGENFIVIVTTDTMTTMAEAARDLQMSHTLAQWLYIVSDTNRTNGNLSTLINEVFEGENIAYIYNRTDDGTHCQNGILCYCKELMDAFTLALDAAVQEEFDVAAQVSDEEWEAIRPDRLQRRDMLLRHMQQHITAHSKCGNCTAWQALAADTWGATYRNTDLISNKDDDNVTTAIENVDLIQVA…
>PbraOR1
MLDEKMSKFYDYFIKLAPLQAIIVFIGEIYYLVQRSGTIDLYSLGEVLINTLLTFITFARVLYPNLKFYGVIWRRFIKEFHLGNFMQCGRNYKKVADRINKISNYYTLGMVPIIWFGVILFNLSPFWANITSGAFQNPRPQNITLRFSVYYEYPGFKPEENFILVTLLNLYFSYGCTVIVCTLDLLLILMCFQIVGHQMVLQYNLDDFPKPRKISVLPLTGDVSVTVEKYSIEENTYIHCLLTENVLHHRYIVCFADDISSFFGPMMGLVYFFDVTGFCLLFLECSQLNTESLARFGPLTIIAVSQLLEISIIFEIVGTMGEKLKDNVYNLPWQCMDMKNQMTVLIFLNRIQRTMHITCMEVMPVGVQSMASILKTCFSYFTILQSMDI*
>PbraOR11
MEMKNYASKKYTDFSHTYKIITFMMLVGFQYPKPELHRARAVAFVCMLLSVTPVCIFIFIDIYKSILVKNFVTVIRHCTIVGPFLGVFFKIMIMHIKEKTAMQIINEINRDYELFNTMSPSYQEIIDAAIVNSLQYSERGWTITVLCVVLIFPVMAAVLNVYNFTFKSEPAKYMVHDLPKPYGEPEERFDTPYFEIMFIYMVYCAILYIVNFVGYDGFFGLCINHACLKMQLYCQAFKEALASENMHEKIAGVIKEQNRLFEYVDLIQDTFNVWLGIILIATMIQICNCMYHITEGYELDLRYIIFITGTIVHIYLPCRYSAKLKHMSVETATHFYISGWEHVNNIPIRKMVLFMVARAQVPLEITAFNKLIFDMDLFVSILQTSYSMYTLLRS*
>PbraOR12
MLSCIKNIFFRLKSRLQKNSIENLLWLVNLIPSVSGSSLGSNRKPNVLFWVVSVGLLTYVYVAGNVMFQLNFARSPGDYIKSNVNVLLLLLTYNNCYWWLRQSTLLKKVLKQVKENDRLAKESPGHFEIHEKLMSVVKKIIIIFYGSIWTDAIFIYLPNRVDISNNHYCMTPCVGMEPLSATPNRQICKTILFIQEVILVIIDLNYQTLQLLLISHTATMYRLLAEEMQQLDAPVFDENHYQGIKIKLPSLIFRHVLTLDIIKNLQSLYSFPMGVNFGLNTICIALFFYLPTEEWIDFCPFLIYCFFVFFLYCYLCQKLIDATEMFERSVYACGWEKYNIKEMKIIYIIMLQAQKPIELLAADIIPINIYTFATTIQFLYKFITVVKF*
>PbraOR13
MVFKLSNFFIETKNHLKGNRIENILWFVNIVPKQLGFSLERDKVFVPFWIGTAFILIYVYGVGSIVYQAKFARLPSDFVKNYFNVSILIFVLTNCYWWIKQRPLLKTVLKQVTENDRLSRETDCLLKKHENLLSVVKKIVFIFNGCNMIDAIFIYLPHRIDVSNNYYSMTPCVGLEPLTASPNREICLIILTLPEFCIITIMLTFQSLILFLIAHTSAMYQLLSSEMLLLDKQDFDQIHYKEMKEKLPKLINRHVLTLDIIKNLQDLYGMPTGVNFGTNAVCIALFFYLSLQECVNFSPIFINSFLVFFLYCYLCQKLIDSSEIFERAVYACGWDKFDVREKRMVYVILLQAQKPVKLLAANIIPVNIYTFATTLQLLYKFLTVIKF*
>PbraOR14
MSSYTKNKTSEFIAQLSRLQFICGLTYVWVDNKKSRFFVYFNKVATILLYSFILSEIASLFTQTHLSEKQASDQILFAFSHPVLMSYSLSCIYYREDIKKLLFRLSVDLKGRYNDLEIEKEMIRKAKLYSVLYVITFSAALFFYAFDGVLQVIRTDGTFTTVIMAWPDVKEKGFLPDTVRVGAYLIWWIFMIRASAVYVFVITLTIVLSHQYKNLQSYFCNLEEVFITNNNDMDGKEKEYESGLKIGIALHAETMWCVKECQRICRWVFSGQITINLTVFCMLMLQMVNSERTLVNALATLSTSLALLVSTGFFMCNAGDVTVEASILPTAIFFSGWHHCRGESSIRVRNLITFAIAQSQKPVMMRSFNVIEMSYRSYVSIVKSSYSVFSILY*
>PbraOR15
MERLPDEVSKPLFLSIDVLSRSNFQIWNHYSTWKKIHIFYMIPCVIVFFIGNALYTINMFSRDVSLSEVAYQISIFLIIIQATVKGILLIPKKKKIAELIEKLGATWTKGNLNEQQIRSKKFIFKRMDFCLKIYYWGSMLACWNIELAPALVTIVKLAMGENTILLLPFGVALPFDPRKDWITYILVYVYEMYSAFRYTYVYIGIEILMVTLCALLSAEFAILRDDFRQIEPESEETNNTALKNLVQKHQQLLMYTQLLDAIFNKILFFDLLFVTGIMCLFGFGATVAGGVVELVNDFFSVIALLLPVLIFCYYSEQVKEECVGIAEAAYDNKWYQGSESYKRIIRFVIIRAQEPCCLTSMGYAPITLNTFSRVVSTTWSYFSLIRTVFSED*
>PbraOR16
MSKLDQLPKNFVKTFYRHIKYVNFLGIDIFDDSKANNYKRQCQLAILYSALLSTVCGQFLYLFLSHRTNANFLDIINALPATLMATQDIVKLCILTIKRNEVRKVILALSELWPVDFNSKKMNTVCIWTRRLSLFERTFYYCGYVAITFFFLVPLLMTIYTSVTTSKIDYQFPLDIYFFSFLKSHWAYAAAYFYISIVGGTVHICAYIAIDFILTSITFDVSGLLAALQLDLADMNVYNEEPENDYSLLKEIVKDHQKLLRVVDNVNLIFGPLLFAQVTFSSIIICCFGFLTIVGKDLIKSLLATFGIILAMFNFCWSGQLLSDASSGIAEAAYNCPWYNRSVEFRKYILIIIIRAQKPCTLSALGFSDVTLTTLSKILSTSWSYLSLLNQMYEDIA*
>PbraOR17
MALKRKIAFPVTEKDYLKLICNVIHRLGLADCWYEKQEIRYPILNKALFLIVNIFWVIFTVNVLAANCRTDLTLKESNDVLLFSYGLPAIILKVIILYAKKEEIKVFFKKLLEGEVTQKSNKKAIRAAKVIYVVVCCGFFSATVLMLYGIKDYFVEDIPIRVEVLYYPKASDTGLLVNFIRFLSVVHFWYIICIMQSTDYLCLCTLVFIKYKFIRVRMFFESLGKKSNSSQEFEKEFLDGVILLKHALWCARNVQNTIGSIYSVQIVESITLLVVLLLKSVYAGSDMALLLVCLGSYMSIVILTGVYMTYSANITNEALQVPTAIFHCGWEKVEIRPGLRKLVVVTLQQSQKPLYMTAFGVINLSYENFLVVLRLSYSFFVVMRDSKSTRT*
>PbraOR18
MDTLRKFNLNYCDLSSMLENLDILLRISNVKINKNNDRPINIIIRLIWVMSIICYYYAYVFSMFWFVLVQYPQTEDFITACVMFSLLVCSQPSFVTMFYIIIYKKRVQNLIHSCLQFNYLVKPGTIFSKNLYSHLKHIKARALIVWLAITINAVFYGLLPLAMPGRHLPEDNQVIYGLEPMFESPNFEIAYVVMGICVYICALFLANVTALNLVILGYVEAQMITLSIELQNLWENAESFCKTHASSYIQDDVTKNKIKNIFTNECLKDIVLFHIHNVSIIKEFEDVFRVTKAIELMCIIFSIVTELLGGIENTYLQMTCTFVLIFIESLAGQKLMDASCMFEKAVYDCNWENFDRSNMKIVAIILPSAQKILNITAGGMTVLNFACFLSVIKFSYSVY…
>PbraOR19
MPSLRPRDEVLSELNFIRYLTTKIFLYPFIGRSKLAMIGYVLTTFLVLSTTLQLLITIVSANTSEWLAIINAAPNLGVCVMSAIKYTNIQMHTVRYNQIFLHFHDEMWDVVTNSDIHRKIIRYYKKLAMVFNRFLLYYSIPLIIVVDSFPYIVMRFEERFLGIKEYLYPFEAWYPFDKIKFYGAAYIWESCMTAVVVSLYVITNMIHSTYIIFTCMELRILGNCLEELISDEDVDHIRKGVQIEEIYKRSVRRIKMIISRHDVLAKQIAALDTILGDAMIINYSLGAVFICLTAFTSTVLSNFYKRVRYSFMCLSLIVECFIQCFMGQIISDHSKNLTNSIYSSNWPYASPETKTIMLMFMMRTQKPFVLTAKGYIAMNMHTFSRICSTSYQLFNLLRT…
>PbraOR2
MERLPEDVIKPLRLSIDILGRSNIYIWNNDSMRNKIRVVYMMVLFIVFFISVALYTIQIFSEEVPISEVAFQISTFLFLIQATCKAILILRNRTNIVTLIEKIGDTWRIYNINEQQIRNKEFLFQRLNFCLKVYYTGSMITVWTNAFAPIIIYLGKLAMGQNINPLLPFGCVIPFDPLKDWFRYILAYVFEMYAILCFLYIYIGTEILMVTLCALLSVEFAILKVDITLVKPDNSSIKSLVRKHQQLLVYIGLLDKIFNKIIFLDLLFVTVVMCLCGFAVTMANNVVDCVKNVLCVLSLLVPVYIFCYFSEQLKQECADIAQAAYNSKWYNVSVSYKRIICFIITRAQKPCCLTSLQYVPITLNTFFKVVSTSWSYYSVIRTVYGDK*
>PbraOR20
MTNIFKKTISKYIQTVGPRNEVDDIFLPALAYQSIFGQQVLDPRWSWRKHYIHQLLNLFLFIYVFLGTLECLKTSDDKDLQAEAYYTIIMIIIFPVKMALFIKSRFTFRTLYATVKNILIDVIRRNPTADIKRVLQTGNRIVFSLFCMVIVPVSIYELTTLWNYIAGTRILLSRSTMTLMPMSSPYYEIAWFLHTIFLLEISSTIILDMWFVALIYFLCAAYQGLVSILKIEINMRSDEYAETLTKALREFYYTHLELNKYLLSLIKMYKVSAFIPLCNAAMCICLNLLLMSKEINWRFAPHMLPMFAEIFAYNWFGEQIKTKMNEVKLALLDYEWTSLKPKDRKAYLAIIIFMTKEFGLKTISGKDLSLITMTAVLKITYQTFTVLQTIDA*
>PbraOR23
MEQSKTSEFVEKVTKLQYMLGLPYVWVDDKKPKYFQHFNKFFTFVAISFVISDYVSFFTQNHLTEKQTTDRTLFTLSHTILILYCFVFEYYKEDIKILYKVAVSLKTHHNDLAIEKKMIRKAKIYLASFGSILGYALTSYAIDGTMQVLKANGTFTPVITAWPGVTERGFWPDVFRIIAYFGLWMFMLKVYAVHVFVFSIAVILSHQYTNLQSYFYSLDDIFKKTCSVEEKIKEYEKSLKLGLWMHVKTLWCVEECQRINTWVFNGQTTFSFTIICLELLQMANSTSVMNALSNVSSGLAVLLSNGFFMCNAGDITAEAASLPSAIFASGWHHCSGSSSARIRKLITLALAQSQKPVVIRSFYVIEFSYETFVSLLKASYSLFSILY*
>PbraOR24
MFKKLRKFGLGHCDFQSMISNVSILLRLFVINIDKRNTKRIPLISFVVTILISLGYFYTYLISAVWYVFWRCQETGDKISALIVFSLGVASEISAFKLLFMYIYSDSIRNIVEGYLNLDAKTCTEIRLAISLESKLKIIKKRATMYWCLLISNGVVYAFKPLLLPGRHLMEDNFDLFGLDPILESPNYEIAFTACALGIFYTCYLASSISAFLIVIAGYTESQLIVLSEEIKNVWDDAKEQINGNKDSILYKEDETKCLNNIINDHLKNIIIIHITNIDLMNDVKRVFSGSILVEFLLVITSLIAELLGGLENTYLEMPYALAQLTMDCITGQKLIDACDVFNRAIYDSKWENFDSKNAKMVLLMLQNSQKPLCLSAGGMTTLSFVCLMSILRMIYSGY…
>PbraOR25
MNRGEFNRVLRHLLSYSINKCDLNTMVGNVNFFLRALTVNIDNRNTKPISVTFYILTIIGLICYYYVYVVSVVWYVFVHYPATGDFIGTVIIFSIGAFTETCPIKLLFMIMHRKLIANVVERYLRCDAQIDLGSRLHQNIQSRLRTVKKRGTTIWLTLVIIAEIHCFTPFFLPGRHFPDDKYILYGLEPMIESPNYEIATVILTITISSATYYVANCTAFMVMLLGYTEAQILSLSEELLNVWNDAERETEHIGIESRSSAINNFISERLTFIIKLHNENITLLKQIEGVLRVSMALEFLFLMAGLIAAMLGGIKHTYLEIPFAFAQIFMNCYLGQKIINASETFERAVYDCKWELFDKTNMRTVSIVLQNSQKTLNLSAGGVAILSFQCLMSVIKSSY…
>PbraOR26
MEKFRQFNLNYCDLNTMLENLDFLLRISNVKINKNNDQPIHKIFIIIWFLGIICYYYAYVVSLVWFVVVRYPVTGDFNTPCILFSILACSHLSFVTMFHIMIYKEKLQNLIQRCLDFNKIVKPGTMFSKNLHDQLRYIKKRASIVWVAMFMNAVFYAVLPLAIPGRHLPEDKQVIYGLDPIFESPNYEIAFVILSFGIYICGLFFANVTALTLVILGYVEAQLLALTTELQNLWEYAEIFYETHTLSNQNHSTKNKIKNIFINECLKEIALFHILNINIIRNFEDIFRGTKAVALISTILAIISELLGGIETTYLQITYTLVVVFTETYAGQKLIDASIIFEKGVYSCNWENFDSNNMKIIATILPSAQKTLNITAGGVTVLDYCCFLSVIKFSYSVYN…
>PbraOR27
MEAIRRFRLDFCDLSTMIENVDVLLRIVNVKIVKANDRPINMIILLIWVTSLICYYYAYIVSTIWFVFIRCPETGDLIAASIIFSLAACSQPSFITMFQMIIYKKKVQELIENLQGINYLVKPDTTFSKNLQTHLRYIKKRAMVVWITMVVNGMVYILIPIVMPGRHLPEDLQILYGLEPMFKSPNFEIAVIITALGVYICVFSLANVTAMNIVVLGYIEAQMIALSKEIRNVWNSAEYFYRKHAISYKSSGSKQIIKNIFVNEKLKEIIYFHVKCIKALKYYENVFNVTKAIEFLLIVLGIISELLGGVGSTYLEISFTVVLISIECISGQKLKDASMMFERAVYGCKWENFDVNNRKTILFMLPSAQRTLKITAGGTTPLDFSCMLLVFRFSYSTYN…
>PbraOR28
MNVKRTFLSFWESFRKYGLRHCELEEMLTNVSLLLRTVTLNIDIRNKKPIPLITYVFTILGFLCYYYIYFFSMIWCAFVRYRHSGYFLGSVIVFSVGAYTESCGIRLLFMVINSKVLREVVERYRVCSTEVEPGSRLARNIVKHLKTVKKRATLIWLGLVVNAYSYLILPFFLPGKQFAENRLIIYGLEPIRESPNYEIAQVMYCFAIPTATNSLANCTALMIILFGYTEAQLLGLSEELLCLWDDAGHFSQFENGTKTEVMNNFVRQRLKYIIKLHNENIDLLKQLEQVLRVSMALEFLVLMAGLIAALLGGVENTYMEIPFAFAQLFMNCYLGQKIIDASETFETAVYGCRWENFDTANMKTVLIVFQNSQKTLKLSAGGVAILSFQCLMSVVKSSY…
>PbraOR29
MSDLNLVFDKEFKITTMAMRFNRSWPHGKRSMLCKIQVFLSYFVSIVTLFFLLYSMVLHDFPDEVYGEVVKNGIIVIVSTSVVIKFFILIHHRESLVNLIKIVQNDYEEAEQFNNDDKTIILDYAQKGNDICKIWIVIAAGASMMFPIKAIVLMAYYSYRGEFKLVPIFDMNYPDVINAHKYEPKMYFLLFLLIFPFDCFAGTMYVAFDPLVPIFMLHLCGQLQLLSKRITRLFSQNEADIKENLRSINIKLQSIYRFLETVQNIFTVQYEYNLKTTTFLIPFAFFQILQSLKNREFNLEFVFFFVGAILHFYIPCYYSDMLMEKSGKMREAIYSSGWEHNANIKSRKTILFMLTRTTMPLVIRTIFYPICLDTFAEMSRHSYTIYNLMNAAWG*
>PbraOR3
MAVQYYLQPPREQIFYKVLVVLANLTALGNKSWWGYTVPNIYYRLNNLIIITFAPSLLISQLIYLYVNFNDLSFDTLGIIFSIIPVTCLANVNVYSAKLSYYKKIMKDFMCKIHLNNGRTESAFTKKKILIIERLSRWTAYYLIFFFSMNWVTWIWIPVFNNINNMEAIQNRSMKLQTCLYLWVPFDYSYNYQNWVIVHIINTYVVGMGVTVMMIFHTLNYIFMYHLIGHIQILKHKIRSQFPKNITNAKVKDILIEVLKYHAFIIRVFKDVQSAFGINVATNYLHNLVGDSLIMYQIMYAGKENLLLYVVMVTVYMGGLILMSFVLEEIRRQTEDLADVVYGMRWETMSISNQKIFLLFLQRVQPAMEFTALGGLKAGVKPMISIIKTTFSYYVMLET…
>PbraOR30
MNTCDELRFEKIFQTMLKAMRLNKTHPNIPRDKKWFLKFIIMYGIFMLGISFAAYSTFFHDLKDGNFSQACYHGVLIVIFTVVSLYHIVMRWHRFRFQDLINQMKEDYDVAKHFAVEDYNVVLDYAKRGKMIMYTWLALALSCVIIHQLSAILPMVHNAAMTGEFQCVHLYNITYPGNLEIWKNETSVCLSLFALFTYGYIYAVIMYIAGPALGPILMLHGCGQLELVRRRIAETYSKRNKGFEVHNLKLAAKHLSMTYNFMKKTNESLQMFHEIIFKAVIVILPILFYQLKEGNTNREMNIEIIGFVFGATLLCGLPCYYGDLLMEKTNDIKMALYSCGWEHHVEREPRTLILLLMIRVDRPVGLSTMFLDICLEQLTDIYRQAYALFNLLIAVLD*
>PbraOR32
MDSRFKSFNETFTRCAFALAFALIYPNSRNLKKRVYYFIVVIFINSLILYWFLIYLFRCLFTLDMINFANNITIGVLATLFFFKTPYCLYKTGIFAKVLDKISYDMLKGNDMDEEYQEIYEHYIKIGKLGQTCWILIPILLSSQFPLYASFCMIYETFTSGEGKRYMVHEMRLKHIEDKQDETPYFELVFAYNLVQCVVLSVNFVGFDGSFCIATTHLRLKLKLVSHKIHRAFRDSKNRYELKARVIEAIVDHQDALDFYKDIQEVYGGWLFVVFLLTSLLISFNLYQIYLSRRVDPKYTIFAISGVIHMFAPCYFACKLIKSSEELSWDIYSAAWEEWTDPVVTKLLIFMIAKSQQILILTGKGMVQFDMQLFISVLQMSYSFFTLITS*
>PbraOR33
MMYPNPRKDSKRTIGFGVIGVLCAPQLFIMLCDIRERIQINDTDNLFRQLIITVLLVYVYIKIFLTINQNKKFRAILDKVSTDYESYNHLPEDYLVIVTETIEKCKKLEIIWTLMVICTGLAFILQASVLTLLSQFTEEPRKYMIHESLIPFIEELKYDTPYFEILTVYGIYTVIIVIIAYTGFDGLFYITVLHASLKIKTYSHKISHLMEDADISTINAKIGIIVKEQCDVYRFIKQIQSFYQFWLASVFTLVIIQISMGLSQTKAGSENTIIYFIFATAASINIFIPCYVASDVTSTAAEVCNFLYDCKWESVPDTSVRRSIVIMMARSQVPVHFTACGMLTIRLEIFVSIMQTAYSVYTLMIS*
>PbraOR34
MLKLHLLIDKEDFFYFNEKYLYYVGLWPNRQSTVYKIYEITLHILAIIYVIITGIGTFQFKHDTLVLMANLDKTLVAYNFGLKIFFFVIKRSQLQKLINEIKYSGDKVSEERVKFMSAHIIFITILSTIIVSIFCFLAQYHGEMTVELWVPFDPMDSKINLILANQIAAITFVVPHMYRAFAVQGIVCTLIMYLCDQLDELQERIRSLVHSTDNESAMRVEFTQIIKKHVRLMRYSNTLTNIFKEFFLIQNLAVTIELCLNALMVIVVGREQKTLLANFIAFLLVALLNAYIFCYLGDQLIEKSEGVALAAYESAWTSWPSDLQRDLLTVIRAAQKPLKLSAGGMATMCIQTYSQALYNAYSIFAVLNDVVE*
>PbraOR35
MFENRALNEIYNTMKLCDYCTRKIGLTFKGTTNELFRKLWTNLWLFISGLILFLMVAGEINYVINKLVTSSSVVEFVSGLHIAGYDTMSFGKLLTLWYKKDTFKHLLIELADIWPMSERDKEAVEIKRKKLSRLRIAQFWYAFWNILGLWLYNLTPIVVYLYHKIQGVPAYLDYIWHLSYPFDKTKPVYHEIVFVFEMYGGVVSVWSMLGSDILFMTMSSHISMLLELLQLKIRTLSYIQPTNKNNSYEDILSVVKIHQKLIKYGNDLEDAFSMVNLINVLLSSVNICCVVFNILLEPWMAMSNKFFLGAALTQVGILCWYADDIYTASTGVAEAVYESTWYHSDTRSRGALLIMMQRSQKPLYFTAMKFSSITMKTYSSILTSSYSYFALLYTVYRSD*
>PbraOR36
MLKVKRFYNKENFDFSTGYVDPFEFHKTCYMFLKAFQVWDGAIPKWTYLLKALILFCGLSAITLLKFGVYHGLDTRDLPYMTEAGTYFLIMIYKLLIMSCTVFNLPDYHNLLQIVREDFQYVCDKGKIYRERFFQNQLKIWKICQISIVFLVCIALGMMTFSIASLIWYLKTHDSENGTRPLPFPIWAPHVDIGKSPLYEVCLIYSNICVVTYALNFIFMMQIQILWIGEIATKADLVIWSIEDLMNGIRPALNKQEELYFSTLLKQRMQEIVKIHKSMIELMSSYARVYTKLLMFEQKVCAPVVCLSAYGATEIMEKTGEINGILIILCIATIISVFIPSFLCNFLSIKVSSICYACWNIPFWNATPVIRPYIVLIMQRSLRPLPIKASGFEEVSIET…
>PbraOR37
MDETFQVFDRILSFAGISIFAKPNWNSKRWLIIQTFNFLLGFLTFIFTSVFVISNLSDLLVCIQGACVWTTGVIMFISFGICLIFKKDFEAFVEEMAFCDRALDIPLVNSVISLATTTGKLHELKNLVLTSQIRVFKITKMLLKTYVASVWLCATLYLCGPIYMMTIREDENLRLLAFDMWFPWSLDDFNVYIASFIFHAYTGYLCCIAYPGLQAMIILLVCQVIRQLQIITFIVTYLDDMVLEVIGTRNEMWQVACTSVLSQCIHHYVRTKRFANRLNVICQPFYLALILVAIMLVCVCSVKIAVSPKLALETLKYYIHEFCFILVVFMFCALGQQVENQCEKLELAVTEKWYIFNRKHKVNVLVFNMALSQRMPIFVFGSIPLSLPTFTWFIKTGMS…
>PbraOR38
MSSNTIGMPGFEEIFNQIQINFWFIGIPFEENVKLRFYIMWSWLFVMITQESLYFISKFSNENFLDLTQLTPCTCIGILSIIKIILIARKRLNVFKLTSSLRILYEDIIRDDKKVSLVKANFVFLKYLTKYFFILNAILISVYNFASIFLILYFYLKKNKVQFILPYAILVPFQIDNLGKWFIIYIHSIVTGFICVLYFTTVDALYFIMTTHMCSHFTILSQEIRDLKANTTHLLKDIVKKHQDILKLSEDLEEIFSGPNLFNVLIGSIEICALGFNLTMGKWTQIPGVVLFLMSVLLQILMISVYGEHLIMESRKISDAAFESEWYAMDIKSKKIIILIMLRANKPQTLTAYKFSVISYESFTKIISTSWSYFTILKSVYKSPGQLPNEN*
>PbraOR39
MIQSLGKDSFDRSLILIKISLWLAGVNVFHNNEKILPKQISYLFYVNIFWLYSAVSGQFHCIYAYIQEGKSFEEISLVAPFPLICGLSTIKAASIYINKHATVKVLKKLRELHPEILTIDEKYFKNNKVQSDIQKRILVIIDSTKQVLFKFVICMCLGVIFVIILFCVVPLTSMAMDYNKFGWTELKLPYYVRYLYDPYSMPWWPGEYIHQVGCSVIVCVNLFGADALLYAFCLYLRMHFEILSIDFERLSDSKEDLIELVLRHQELIELVNEVQNIYSTSMLFNIIISSFTICFCGFNITFIKDVGTSFAFMNFLLMSLYQIFMLCFFGDMISVSSTKIADAIYINKWYEAKPAFQRSLFIIIMRSRKPCVLSAAKFATLNLITFTKVRF*
>PbraOR4
MVINIPEYYRKYKSFPETYKFTTFSMTTSFVYPNSKYIKHRLFGFGLITLTTLPLVIFINIDLVRYAMDGNIVEFIQQTNLLGPFLAILFKMLIQCYCNQHGFALINEINRDYALYNDMSAPYQAIADESIKNNLTYTERGWFITVALVVLVFPAMALARNMYYEFQGVNRKFMVHEVRIPFVADDDRYKSPLYELMFLYMVYFCFIYLVGFSGYDSFYGLSTNHACLKMKIYCKMFEEAVKADVNEVQSRIAEVIKEQNRLYRFVDIIQNTFSIWLGLILLATMIQLCNIMYILIDGAGFDLKYLIFSIGSTLHIFLPCLYSAKLKDMSLETATLIYCGGWEQIHRPEIRRMVQFIIARSQVHVQITAFNVKVFDMELFVSILQASYSVYTLLRS*
>PbraOR40
MVEFENSFKLTKISLFISGVNLSIKTSIPLNFLFIFNLLWLFTDVFGEFYWVIEGIRAGKSFEELSVIVPCTVICFLAAFRCVPLYLNNKHLANIFDKLREIHPKAEDKENMIEKEENEITERAIKLFYNIVIFMVIANTSVVIAFCLLPLLLMAIDYQKTGEVELKLPFLVKYFFDPFTMTNWPFVYFHHIWSTFIVVLYLFGADTFFHACCIYLRMHFELLCSRFQKVVTNSKKETEERLRACILQHQELIALVELMEQLYSESFLFNIMLSSVLICLGGFNIVFSKQFGPIFAFVNFLVMCLYQIFMICYFGDMVVISSSQVGDAIFNSKWYNAELKIKKSLYIVLLRSQKPCTLTAAKFATLNLRAFTTILSRSWSYFALLRTMYN*
>PbraOR41
METNRALKELDKIFSLLGLSYDRSSKKDRIKRRCIYIFNFIWHNSDVFGALVWFFVALQKGASFIDLTYIAPCIAFSFLASFRIYSVISNEEKVYELITTLRELEHRAMSDTEITEIFREDTKFLHKVLKMSKVLNFILILMFFITPLILILVMYLNTGKWDLLLPFLIVYPFDSHDIRYWPFVYLHQLWSEVIAILEICSTDNLFYICCTFIRIQFRILQTKFSKINMHRSLNADHFKLEFTELVILHQQLIRSLKILDQIYSKSTLLYFLTSSIIICLNGFNVMSMGDKAFTSVFLTFLLSSLLQIFFICFFGDLVMQSSSGVSNAMYSSKWYNTDVKVRKLCNIVQIRAQMASKLTAYGFADVNLRAFMSILSTAWSYFALLKTLYNPS*
>PbraOR43
MKILPQPSGRKLSIIKPYLPYGVLEAWDDLNPHLYHAIHIYWLKFYGMWYNKYSPNCLYFWLQIIYTVIVLWLVCFLPAIGEIEYLLKRQDNVGEIAEGLYLFLSEMYTYFKVAVFWLNKRKILRLLKYLHCKEFKPDEQEHREILRDSIKTSRFVMTSYSTMCVGAVSVAMIMPLAENFEILPTNVEYTYINVNKAPAYPIIYLHHVYYKPATCIIDGAMDTMLAAFVVCAIGQIKILSFNLRNFGEIAMRRRKKAIAEGQFVGNHDFYLKLVVKKCILRYNAIIRYVSMIESAFSLASALQFMLSVMVLCLVGVRFLSIENPRCHPIQIVWMAIYLACMLIEVFILCWFGNELILKSLELSMAAYEGPWLKLDPKTTMLIIVFMERCKRPLRVTAGK…
>PbraOR44
MGDMIHCFQINEIFWNMLGIHPKSKNTYHFIYSTAFVIFFIIIYDFLFSINFIFMPNQLDLFIEELILYFTTVGVVSKVLTFVFMREKITQLLSILKSDLFQPENEKERHILYKANKFIITYWRIVAVVSFTSNITHVTSPLLLHLIFGAPLSPPVCSYSFLPENTTHTFIYPIYFYQTIGIHFHMLNNVNVDTFILGLMILVMAQLDILAVKLENVTNMPSAINHDRSQCTDAERNLILKLNSSLERYNEVTKFCELIEEVFSVSLFVQFSIASAVICVCLFRFTLPSTWQYYIFLGTYIFIMIIQILVPSWFGTRIMDKSYYLSFAIYSSDWTPQPRDFKRNMRIFVERASRPLSITGLKMFPMSLSTFTSIMNSAYSFFTLLRNME*
>PbraOR45a
MATISESFNINFICLRIFGVIWPGKSLSIYYILYSGFYMFTTLIVYYILLILNLFYTPRNIELLIREILFCFAETLAFSKAVMIFLNQKPLVRAFHVLDCEHFKGEDDTSRKILSQYIAKYKTYWKLVAVLSHMSYLSKIFVQIGYFFYGHVELPFYNYYFLQKDTIDRYFVFLWLYQACGIYGHMLYNMNVNTLIAGLFLIVVAQIEILDHDLRSLKADNSSEEFQVIKFNKCLRHYEILLQYSNEVQDITSVTMFVQFTVASGSICAILCSLLLPKTFGELMSLLLFMSTYAVVVILEIFIPSYLGTQLRYRSQKLVNAAYCSEWIARSESFKRSLKLFMLRANNPIDFSGCGLFPLTLDTFTSIMKSAYSFFTIVRNFQNHK*
>PbraOR45b
MANISDTFNINFICLKFFGVPWPGKTSSIYYKYYSGIYILVSLILYYLLIILNLFYTPRNIELLVREVLFCFSETVAAAKVVMIFLKRKAIVRAFRILNCKVFKGDDKSQQLVYKYIVKYKTYWKFNAVMSNSAFFAKIFVHIISYIVYGNIELPFYNYYFLEKKTISRHFAFLWFYQAVGIYGHMMYNINIDSLIAGLILKVIAQVRIVDQELRNLKSNSVEEEQLVKLNKCLRHYEKVLQFSREVQSIISVTMFIQFSVASGSICAILCSLQFPKTFGALMSMLLYMSPYAFVMILQIFVPAYLGTQLRYRSQDLVNAAYCSEWIARSESFKRSLKLFMLRANTPIVFSGCGLFPLTLDTFTSIMKTAYSFFTVVRNVQSAEK*
>PbraOR46
MEIKLSYKSVEAHFLNLRLAGYYQIDLRSGTIYRSLHRFYMGFVLSLILVYTMQQALKVYEVRENLGDVMGTMFLFLTHTDAIYKQILLWALQNDVEDLLDTMKGPSYNQGKKEHNYYLLKTIRFAKLLLFSNNALAVATTFLWFVYPIYLHRKGIQLDFTIWLPFDENQDPYFYITSIYSWITTTWLAIANTTMDAMISTLLAQVKTQLHILGYNLTTIVNECKEDHGSRSENFSSVLHQRFKSILRHHEEIIRFTKNIENIFGNVLAYQFLIGGWIICTSVYRFVDIEIVSMEGFPMVTYIICMLFELFIFCYFGSEVTQASIELTNDAYSMNWFDIPVKNRKELIIFMERINRPIRVMVGRIVPLSNDTFVSIVKSSYSFYALLRSTTE*
>PbraOR47
MSVTKPIDQAKSYVHFMLLSLKIVGCWEWYPHAVNKQIYVNNIYICMVLFILTNLPLSLVVHLYTEWTDIMSNLDKMADGLPLFVSVAIVAYFAIYKKELYELIEFMNVNFKWYSANGLTNMTMEGCYKTARNFAYFYTACTVFSVAMYVVLPMIGYLLFSHPLHPWIYKDVEDGLFIFFVFFRQCVAQGFVALAVGQLGVFFACNAILLCGQLDLLCCSLRNVRYTALLQNNVAHEALKIQGYRSILEDEQHSYTYNISTETESSYHYDVEFIQHGKKRRFDINSKHYDDGTARAILECARVCQVVKEYQDRFETFVSPLLALRVVQVTLYLCTLLYAATLKFDMVTVEYLVAVALDIYVYCYFGNQIILQADRVSTAAYQSAWTSMGLAPRRLLLNM…
>PbraOR48
MKFFIGHTYYGLKFSLNVLQLSGFYQPDTLSGFRMTLYALYCITFYVFIIGTYIVVQAGEVVQVWGDIPLMTAALFLLFTNFSLSFKIFNVVLKRETIRTIVNDCEQELISEKRESGRKIIARFNRQARLQLFTYIALSAGTVVGWAASAQKNQLPLRAWYPYDTTQSPAYDLTYIHQCVAVGLAASVNISVDTVVTSLVALCCCRLQLLALSLQTLFEDLPLQTKGLLHPSVEPVAWVRLKECIQQHQTTLKATALVQRCFSLPVLAQFTVSVLIICATAYQLSFETANFIRTASMVFYLIVMMYQVFIYCYQGNEIQVESEAVCDAAYGSEWLLCTPRMRRALVLLMTRTRCPVILSAGGLVNLSLKTFMGIIKASYTFFTVLQGAGYGTK*
>PbraOR49
MRFFINNTNYSLRVSLTWLKIMGLWAPDTLGWKKMLYSWHTGFVYMLVVGTFIIIQATDLFIIWGDIQLMTASAFVLLTNLTHSLKILNMVVRADRIKSIVKKNYNVLKIQVTVEAKKAVKKCNREVNIQSMLYAFLTATTISLWALAAATENQNKQLPMRAWYPFNASQSPMYEIAYLHQAMSLMLSASMNASKDIVVMALIAQCRCRFRLISIALKGLCSDMHIVNNRLTKKQEDIVAFRLGNCIAEHQDNLETVNELERCFSEPTFAQFTVSLAIICVTGFQLVFQTGNVLRMLSMTFYLLNMVDQVYLYCREGNKLTIESENVSRSAYEWPWYTCSVPVRRSALILMTRCCRTAKLTAGGFTTLSLATFVSICKASYSFFTVLKQVEQDT*
>PbraOR5
MDGTITYFDRVLSYAGIRIFSKPNRNSKSWRFYMMFNIMISISAISFTANYFIQHFWNFSKSMQAACLSLTFSILFLNLCNYFYFKKELEEYIDEMVFNNPGLNMHIISQVLKIDVFGKKYDLKLFIINSEKKWIRVSGRMLKLYLALVCFCAVLYYYGAFYKVLKSKDSSLRILPFEMEFPWSVQHIAVYISTCIYQAHAAFLCCIAYPCFLSLLILIILQMTRQLNILAFILKNMADIVEIRERNMIWHEECYEILKQCIIQYLTVKRFTNKLNATCKVYFLIIILLAMTLEAICFVELSLSHDLDIDTMTYAVLLIIVVIGIFILCNLGQIVDNACKELEEAATEKWYDHDMKYKKSVLIFYTAVTQGMPIYIYGSVTLSLETFTWFIKTGMSFYT…
>PbraOR50
MAVVVANTNFSLRFSLTCLKVFGLWPAVGIAGWKKILFYTYSLFIFMLILGTYIVIQLVDLWQNWGNLSLMTSIAFVLCTNLVHCVKIFNLLVRRRCIGHIIDRNDYVLKNATGQQKIDIIRTCNQGTTRHLMIFLTLTTVTLMGFAVGPALESNNLQLPLQAWYPYDWSKSPAYELTYLHQICAIYAAACLNVSKDMVVVSLLSQCRCRFKLLGYDLKTLCQDMCPGTMQRMSQAHDLMVQARLNECIREHQDILDSLNELQRCFSEPTFAQFTVSLVIICVTAFQLTKQIGNFVRMASMATYLLNMMEQIFIYCYEGNQLAVESENVSRLAYEWPWYTCSVRVRRSTLNLMTRCCRTAKLTAGGFTTLSLDSLMSILKASYTYFTVLRRLSE*
>PbraOR51
MAKLTNLFINRAQHVMKYLGVWVPDESDTIYRKLYKIFMLSLQYTFLLFQMIFVVQTWGDWEAVADAVYVLFTQASLCCKIGVFHINYEGVRELCQQMNNEVFRPTCVVHERILQIRANNIKRLLLCFIGAAQMTCLAWGVAALPLFDNGSRKFPFVMWMPVKSDSSPQYEIGFLFQELTICTSAMIYYGVDSVAFSMVIFACAQMEIIMEKILSIKSRNIAVLKNDGFLTKHYLNGNKILIECVKHYQAVITFKELVENTFHIYMFFQLIGTVGIIVMSAFRILVLKNESFQFISTIIYVIVMVSQIYLCCWCGHELTATNEKLHKVLYMSLWYEQDVKFQRALCFMMARIERPLVLRAGHYISLSRQTFVGILRMSYSYIAVLNQTM*
>PbraOR52
MITNTDMFLGRPRFILHYLGIWLPPEEYKLLRNIYKFLVMFTQFSFIFLEFIYIAVVWGNIDKVSEASYLLFTQASVCYKTTVFMMNKNNLKKLIKFMEVGIFAPQTIGHEKILAAQARKIRNLSAVFLTSAITTCTLWALMPLFDTAETRFFPFKIWMPINTEKSPHYEIGYLYQVISIYISALLFCAVDSSTLSMIMFGCAELEIIIDKIQKIRDIPISRINESDCRKRLTENNKLFNECVRHHQCVVKFIELVEDTYHANIFFQLSGSVGIICIIGLRIVITEPSSVQFYSMLNYMLTILSQLFLYCWCGNELTSMSQNLREFLYLCPWYDQNIQFRRSLIIAMERMKRPIIFKAGRYIPLSRPTFISILRSSYSYFAVLNQTKN*
>PbraOR53
MQSCVLFWWGLRNVIFNAEQLKLTIYIGYFATKLSEILFTSCQKAYCDQFRSSAGECVAIHTRVLRFVGFLRGYGSAHALYRRGVLAITTLYLVQECVYAYKVRSNLDKLSRVMFLLLCHVTSLAKQLVFHFDSDAVKRLIDALDNSVFQNEDDAAMQLVNECTRRAWRVEVGYAGCAVLTCTLWLLFPIRDHAQGLHVEFPFASPESTDASPMFAAILLYSYYVTTLVGIANTTVDAFIATIIYQCQTQFRILRMEMEKLPDTARTISEARKEAYETALTQQLAQRLLHYRHITWMAESVQEIFGKAILVQFGIGGWILCMAAYKLVSLSVLSIEFASMALFISCILTELYLYCYFGTELSVESSNLAGSVYAMQWVGAPAQFRRSLLIVMECARRPL…
>PbraOR54
MGLIHRVWIKLTPTTAVQDCGSEEIMYFEYLYRVIYLAGLSFSPENQKYYIYSNAVKAALILLFMSELWQFLSRQWTLDTITDSFNILMIQLGAVCKYRKKLAYENVFKRLASSMSSPNFDLSTDERKKLLEVWQRRSEANLKLLLALGTCTVIPWHIYPLVDDLDYNLMVPIRLPFSYQNQLRYQITYFLVIIVFSYMSYFVMVNDLIIQAHVMHLLCQYSILGDCFRHILKDCKLDFHDLNETQLYSNKNFQLKYKKRIGDLIRQHKFILNNTLDLRDILSAPMLAQLAVSTILICSIGYQLVATSIHMNVTKWLMSFLYLGYNMFGLYILCRWCEEVKIQSKAIGDAVYFSRWEDGITQVPGVRSSILMILARCNKPLVLSAGGMYDLSLQGYATI…
>PbraOR55
MKSFDNLWQKLTHTNALELSSGRFETFYFESVYRVTYLAGLSFFHEKPLYSIYSTTVKLFLFLLCVSELWHFLTSQWTIDTIIDSVNITIIQLSAFYKYTKKLANESVFRRLASTMNSPNFDLSTDERKKIFEMWQRRNEGHVKLILGLGTCTIIAWYIYPLVDDLEYNLSASIRLPFVYQTPILYPITYIVVIIVFSYISYFVMINDLIIQAHLMFLLCQYSILSDCFRHILRDCKQDFKGMDDSQLYSNLKFRQKYKNRLGSLTQQHKFILNNTSELRDILSAPMLAQLAVSTTLICSIGYQLVATSMNVNITKWLMSLLYLGYNMFGLYILCRWCEEVKIQSIAVGEAVYFSGWERGITQVPGVRSSILLILARCNKPLVLSAGGMYDLSLEAYAT…
>PbraOR56
MDGPRRYFAIHFLLLRFLGLGYWHHPDEGDTRNFPGVYLYYAILTELVWVAGFVGLETVDPFVGEKDLDRFMFSLSFVITHNLTLIKLYIFFFKNKDIQEIVHILEIDLQMFYQNNERNRRTVKVTRILTGAFLFFGWITIGNSNVYGIIQDIRWKDDFTLYNDTGRPPRTLPQPIYIPWTYQTDKAYISTFLLETIGLLWTGHIVMTIDTFIGSVILHMSNQFTILQEALITVYDRTRMKLAKDASNTAADLDLRMNKEEDFEKALNIALMDCIKQHQLLISCVEKFANTYSYGFMTQLLSSMAAICVVMVQVSQDASSFKSIRLVTSLAFFAAMIIQLAIQCFTANELTYQASLVSESVMQCKWEQMPPRLRPLLIMIMMRTQRPLRLTAAGFANMD…
>PbraOR57
MSNNTKFILRTFCKFVFISGSGNFYYDQKIYKETFFYKMYSIVSYSIYITMILLENCAAIFGKFPEVEKNSAVMFAAIHNIVLAKMFLLLYHKNSIRKLNYEMTTVMENIEEEYVMREQYRKVKFGIAFYVASVYLSLVAYGVESLRKVITEGVPFYTVVTIYPSFNDISMLATLVRAFFYITWLYMMLPMMAADCMPIIHLITMAYKFMTLCHRFEAISESFKREVKISKTQAIAMMKIKFLEGIVIHQKLLMLTEEIQRVFGIIMSLQVCESSAVAVLLLLRLALSSHQDLTNAFMTYTFVCSLFILLALNLWNAGELTYQVSLLSNAMFYCDWYMCDVDNDSKNIRQLVLIGCAQAQKPLILKAFGVQNLSYATFVSVARMTYSIFAVFYQRRH*
>PbraOR58
MKNYYILKTFCKRIFLVGTGNFWYENGEIGDDSSIYYRTLSSILFFAYCFMTLLEIMAAFMGDFPEDERRDSITLSVSHSILLIKIFSIIYNKIIIKQHMYDIVRVCERYEKESLLKERYRFLKMNVLAYCITVYSSAAFFVLEGLKKAYSGSHFVTIITYYPSHNNDTGLATFIRIFNTVILYIMLLSMIIVDGFAISNLVILKYKFITLRHYFEDLRKDVEKICEMGNYKTAGERLTNGVIEGIVMHKELLRLSQVIDKVFGTAMAFQLCQSSGAAVSLMLLFALSENLTLFASLRIISFVAALFLLLGLFLCNAGEITYQASLLPDAIFYCGWHLCPARYKGQSLGKIVSISCMQAQRPIVMKAFKMFELTYVTFLQVIRGTYSVFALIYAQNQ*
>PbraOR59
MFNPMEKYGYTANIKRNHELSEDYIRYLTQNRRTTMEVTIKHWVKRTGLWFGPLGDSTNWFAKICIICFFMTNAAQFVSLIINRNDPAHLFRCFSVLSFCGMGFIKLTSLQLSRKSWRFLYNKMYIMENEQLNNDDTTVNYESEDEENRTFSPHILLYTKQFVTTSSWLAKMYSFTAVVYILSPFIEYAIYSANGVVDGFRVHVLPIWSPLDNVSIIGYVFTLIIEIIASIYCVAIHITFDTFATGTMIIICGQFSSLREYSKQICGSGKRCDLNLKRDARAHYRIKKCNFIHVTLLSMVNKLNELIRNIIGIYFFVATLTLCSVAVQLQSTKLSATQLISLLQYMFATLTQLLLYCHYGQEVQSKSAVFIGDGPFTSSWWSVSGKVRREIAILCTGMS…
>PbraOR6
MLRNLLKKLENPERPLLGPNYKALTFWGLLLPENVYKKIFYLTMHLLVTVFTATEYIDIWFVKNDINLLLNNVKITFLATVSVAKITTFLAWQKHWKSIIEYVTKSDLAQRDSDNKKALINNYTKYCRKITYLYWSLMYTTVVIVMGQPLIKYISSPSYRENVKSGKESYIEVVSSWVPFNKNTIYGHIAASLYQSYGAIYGGGWITSFDTNAIVIMVFFKSELEMLRMDCADIFGKGKVNDKQAKERLKNCHQRHVDLMANARLFNSCLSPIMLLYMFVCSVMLCATAYQISAESNPMQQFLIAEYLLFGIAQLFMFCWHSNNVYYASKDLMFGPYESEWWSRLKSEQKDISILMDQLNNTIVFTAGPFNNLSVATFINILKGAYSYYTLLN*
>PbraOR60
MLDRFFDRLEDPERSFLGPVKKFLSFWGMWLPKDLKMLIIAILLQLFETVFIITEFIDVFYVKENLDLVLTNLKFSMQGAINMCKVWSFIAWQKDWRAICDYVTRADIANRYSLDPKKKKNIERFTRYCRIVTYIYGTFTFTTAFVVIFQPGFKYLLSSKYRENVKAGREDYMQVVSSWVPFNKHEMPGYFFACVIQGLGTFVAAGWITSYDVIALSIMIFIRAELEALKIDTAAIFDASESDVIDRIRDCHKRHIELIHYSGLYNSCTSPILLLYTFICTVILCSTAYQITSLETSKMQQLMTVIYLLFGVAQLFLYCWHSNDVLYASMDLIRGPYESKWWTQTPSHQRNLFILVVQLSKTIIFTAGPFTNLTVATFINILKGAYSYYTLL*
>PbraOR61
MFFKRFIKSKEDPEKPLLGPNYWLLKRSGFILPSSTKAKLGYIFLHELVTVFVLTQYIELYVVRSNFDSVLTNLKISVLSIVCIVKSNAFIFFQKKWKEVIDYVTEADIWERNTRDTAKGKIINNYTIYCRNLLNFYWSLVITTEITVCGTPLLKYVSSASYREALYDGTELFPHIFSSWMPFDKYHSPGCWVTVVIHILFCTLGAIIMASFDTCVLFVLIFFGGKLDLLKERCKQIFDDANDEEEILKRVKKIHKDHVMLMKYSRMFDSLLSPVMFFYIVICSLMLCVSAFELTSATNTAQLILTAEYLTFGVAQLFMFCWHSQDVLIKSLDVCSGPFESKWYSANLKQKKYILTLAGQLRIVHIFRAGPFTNLTLTTFIAILKGAYSYYTLLK*
>PbraOR62
MLTKLEDPLLGPTIKGLRAWGMWQAERGIKQVFYNIVHILATLFVISQYVELWFIRSKLDLALRNLSISMLSTVCVVKAGTFVYWQNDWRNVINFVSLTELSQSKDKSTEHISREYRKYSRLVTYLYWSLVAATVFTVILAPLVSFLSSPMHRERIINGSAPYPEIMSSWAPFDKSRGLGYVIMVIEHTLICFYGGGIVATYDSNSVVLMTFFSGQLEILKVKCSMLFGDGSSVVNNEEAVSNIKKCHYHHINLVKYSKLLDSLLSPVMFLYIIICSLMICASAVQLSTEGTTTVQRIWIAEYLLALIAQLFLYCWHSNTVLYTSLKLDDGVYKSAWWSHGVKIRRSVLLLGGQLNKTIVFTAGPFTRLTLSTFVTILKGSYSYYTLLNSKED*
>PbraOR63
MLKLLEDPKYPLLGPHLRLLKFTGLWHPVLDRVTRLKLLLFYITTAFFFSQYIKCMLAINVDSIKLILQYIPFHIGIVKACFFQKNYANWSRLIESISEIERHQMLQNDITIHIKNYIHRSRRVTFFFWALALFSNFSIFTEPYRKNQVGNGTDSYLYLFDGYTPFDRVPPGYYCSMLVQTVLGHVVSAYVVGWDMCVVSIMIFFAGQLKIFRIYNMKIFCSKNNATSLKNIANCHEFYMKLISYHKLFNSLISTVMFIYLIVISVNLGVCIIQIAVIQDDLGAFLSASLYIVACLIQLLLFYWYSNEVTHESLLLSYSLFESDWYYAPAILQRNIAILAETTNRRFAFKAGPYYEMSLATFVSILRTSYSFFTLLNETN*
>PbraOR7
MDTPLDIAKREIRESLKFSLFATHCLGVSFTTPKNKFVRTFKNAVFFTSISFIILHASSDAVNIGLTPFSVENVVPLLHTQCYAILSAIKACVLWYKKTVFQQLLTELAEIWPVPPLTAESQRSKYKSLSTLRRVHAWYFAVNIFGVWGYNLTPICKHYYRRYNGEESQIGTIWSSWYPFDKTQPVPHFFVYLFEILMGQVCVWITLSMDLLFSGMASHIVLLLHFLQSQLKSLTVLNKSEEEYHQEIVNCIKLHQRLIRYCFDIGEAFSFINLVNIVVSSINICCVFFTILVLDPFLAISNKLFLVSALLQVGMLCWYGQDIIHANSNISIAAYNSGWYEMTPRCRRALLLMIQRTQKPIGFTAMNFTYISLMTYTAIMTRAYSYFGLLYTLYNKNQG…
>PbraOR8
MGLDTAKQEIKDSLKLCIFFMKLIGFTLHKPTNLSDIIIQKITFTVTVIYVTIHVFTELSFLYVTSTNSPRVEDVVPLIHTAGYGILSIAKFTVLCFKRKVFAQLLDDLATIWPVPPLAKEAQTLKSNSLKSLRIMHSWYFGLNESGVSFYNITPLCLYLFYHIRGQVYEIRTVWKSWYPFDIYKQKWQHVSMYIFEIFSGQSCVWVMISTDLLFTGMSNHIILLLKILQQRLFSLGNSNGTDQENYREVVGCIQLHQKLIQYYKDLESAFTLVNLINICLSSCNICCVLFTIVLIEPALELSNKLFFGASLIQIGLLCWYGDDIIQENAKVAEAAYNSNWYTLRPRCRRILAILIQRAQQPIAFTAMGFTKISLITYSAILTKSYSYFTLLYTMYSQD*
>PbraOR9
MDNKTLAKQEIKDSLRLSNTILKLLGFTLDKAATVSDAVIQKFLFIATFVIITIHVLSELACLYVTSITTPQVDQVVPLLHIVGYGTLGILKFTVLCSKRKVFAQLLSDLATIWPVPPLKKEAQSLKNSNLRTLRLMHSWYFALNESGTLFYIITPIGLYIYYHIRGQAYAIKTVWKSWYPFNIFQQEWIHILIYIFEIFSGQSCVWAMIGSDLLFTGMVNHIILLLKFLQQRLRNLGRTESSSEEDGKKLIECIKLHQRLIKYCKDLENAFSLVNLINICLSSVNICCVLFVIVLIEPRLGLSNKLFFGASLIQIGLICWYGEDLIQENANIAEAAYNSNWYNLNSSSIRRLAFLIQRAQKPIAFTAMGFTNISLVTYSAILTRSYSYFTLLYTMYSE…
>PbraOrco
MINKVKTQGLVSDLMPNIKLMQMAGHFLFNYHSDNDGMSTLLRKVYASVHAILIVTQYLCMVANMAQYSDEVNELTANTITILFFAHTIIKLLFFAITSKNFYRTLAVWNQSNSHPLFTESDARYHQLALTKMRRLLYFICGMTMFSVVCWVTITFFGDSVRLILDKDTNETLTEPAPRLPVKAWYPFNAMSGTMYIVAFIFQVYWLLFSMIIANLLDVMFCSWLIFSCEQLQHLKAIMKPLMELSASLDTYRPNTADLFRVSSSDKSEKEPLDLDIRGIYSTQTDFGMTLRGAGGRLQTFGQPLNNPNGLTQKQEMLARSAIKYWVERHKHVVRLVTSIGDTYGTALLFHMLVSTITLTLLAYQATKINGLNVYAFTTVGYLSYTLGQVFHFCIFGNR…

## Sheet: Prapae_aa
>PrapGR1
MNDSRNFKMNPIRIEQIRKFDAYKEFNGKAVKEYDAKEVYGPQITDKDGELLDKHDSFYITTKSLLVLFQIMGVMPIMRVAKHAQTTKRTTFNWISKSTLWAYLVWCLESIIVIRVGKDRFANFQQNSNKRFDEVIYNIIFLSILIPHFLIPVASWRHGPQVAIFKNMWTHYQLKYLKITGTPIIFPNLHSLTWGLCVFSWALSFAVILSQHYLQDDFELWHSLAYYHIIAMLDGFCSLWYINCNAFGTASKGLATNLHKALEAEDPALKLAQYRHLWVDLSHMMQQLGRAYSNMYGIYCMVIFFTTTISLYGSLSEILEHGLSYKEMGLFVIVGYCMTLLFIICNEAYHATRKVGLEFQVRLLNVNLGAIDRNAQREVEMFLVAIAKNPPIMNLDGFT…
>PrapGR10
MAKEEKDRKIPLCHGPLNLVLKMSRVFGMAPLTFTPEGIKFSLVYYMYGIALITVLQTTIFVGFVMDVTYPKQSRKTATTHMIWLAYQTVLSAVTIVGCYAAPKRCRCIVDALTRIEKIRNFLGEMKTKQIVVIYMYTTIFSFLSAVAILCLIDWYHNVYTAFHLNKQVSLYLLSTYYVEYSIELLLEFQFMIIVIRLILILKVVNSRLSKLLELLDKKKFGNKNILINNFTLPKNNDSYQMKVHEEQANEEVRMLWLVYELVCDLIRRVDRGYGLILLLLLQSFFLHFIMTPYYMLNISEIPSGLSSIGQQVAWFHFHAASVILIVEPCHRVQQEMAKTRSLVSKLMCQTRSYDSLSRSLAAFFKSLTLEQPLIAPLGMSVLERPLLITILGVVSTYV…
>PrapGR12
MLYQCVNLIIFCNFLCGFYVKFSKLYMTILSTIYCASISVFILYGLYSRPLINTFYVWSNNFCMFDTICYILFTYINGTVYVSKFLRKISEIDGLLHFQRPKFFIKTILFFLFIFFEKIFYSLEYYARNDVSTTTYKISMAAWLVYKYGSFFNSVLRNILFALMRQRMKGLRLMLEHNINQDGLDKVEEINKTLEIYKMILDTNNCFGYIVKYYIVRDFFAAFYYVIITTIGISYNSKKSVRPHMAVDAVANILMACCPCIVLQGTINEVANIKTCIAQEFLKCPTEDSHRRTRDKIKDAMKYLDLNPFMFPILHLFSLNLTVPFYFINICCTYVIVAIQFAKLA*
>PrapGR13
MIKTSKFLKTIFILQYLCGFYTDFFKRRKWNIVFRIIMAILIINILYASLSMRRQNNVVLFSIIAWFNLFDYTLAVILSFVGGNVLHYCHRKLLKLDGQMRWRKINLSMSITISIFFILFFEKSYIAWGYYASIKERFALDYNWKDLVGFILWCLVKFGLLFNDFIRSLTFEWIWIYMRTLRKTFQDTTFKRKKLVSNLQTDDIERFIFGYIGTLESLNSMGLTFKILIFWNFSFAFIFTLIATVGIVYTPVRQLSFFMTAEALYHIIIFLYPCVLIELTRSEVDKMKLLLTEIYTLSSDDKILTKAEDALLLLEVRPFEFVVFRLISMNIHLPLHFLAVMTSYVIVTVQFTHAFG*
>PrapGR14
FLSKRLGVFFNGMIRSIIFEWALFSTKTLRISFEKLVFKSNKTISNHETDDILRVVITYAKLLENINSVGWTLKIMMLKDCIFIFYYVILVSVGLVFAPDYSVNPYMVTETIIIILKFVLPCVLMELTKSEVEKMRIILVEITAFSSDNKLRAKAEAAIKFLEIVPFEFTLCRFVSVNIRLPLQFLGLLTTYVIVSIQFMHVFG
>PrapGR15
MPQTLSSLMWIILISQNFCGYYTTMHKQHIFNIPARVLCVILIYITVYKNITQLYKEESTYQTYGKIYQLLYFLIGAIMAFIDGNVFSRFHSNVQSIMSEYSLKFGYRSFMRTITVFTVIFFMEIYIIWSDLAELVVTDLLFPFLFISKRFGFFTTTISRCIIFEWNYFSVKTLRISFDQLVHKSNATILEPNQKVLLDVVTTYTKLLKNINSVGVPLKITVLRDFVLTFFYVIYASMGIVYTPENTVQNLIVVKVSVNILTLFLPCVFILAKIEVDKIRLIYVEISAHSSDEEIRRKADDALMLLQTVPFEFTVWRFISVNSSLPFQFFALLTTYVIVTMQFMHVFG*
>PrapGR16
MPSAIKQSLITILLVSRWFGISPVKWESLHLRVSKGFYIYGALLFCFIATVMINETFPVILTFIQEKEFDFVNNRTELILNKLIIKELIPFGYMVLKGPRRMAVMIEILNQLEKVKEKRVRFTPEKKGKKKFYYFIVSLTVLLAFVYINKYIFDIYDERKPILENIKLFMLTFCIRYACAISGFHFVLVALLIHVLLASINEDLEEIFKDNVPPSSVILYKKPVSVLANRNISPTIDCIGQTPTGTFDAVTTTENTKTDGRIRSISRTYINYCCLARKLNDSEDIVILIYVLKLALNMAVSLLNVLKYDEYITSGVSMVRVAYTLHNIIIALTTGTRLMLLVEPSYRAQVELRKTTLLVSRALNQALERNDLDQLNELRHLLKMLHLNRPVYSAFGVFN…
>PrapGR17
FIYYILFLKKSNFFHTFHFQSTCITFLRISTESARVTLYLVFSLLCTRIKIFQKRLKGNICHRNEAHFLDLYNVYLKIHDMFKELSPALSVMMAISLAYVFVDSLIVQYKITYMILGNTSQDFSFQLCLVLRCIMNHSTVLYPAFIMEYIAEILDIVKIYLMEQVTTVTDLKKKEDIKNLLKLVKDKPIIIIILRAIPVNMSLPVGYISLNITYLVFLLQV
>PrapGR18
MVKYVYDFKKLMLLRIILGWYNDYFIPGLTLKIYCGTSLLVQLIFFIRLIILNKPTYNINLLFKIFGVLVGTIPSCILSILTGDRYLFLYCRWDDILDSDKQAKRIFRIHQILFDSVHFFIIIFYILFYICWYLCCTEYSFSTYITGIILRFTIEMQKMPLFLIFSVLLCRVKLFQLNICLDLKFGSDFPLDRYGQVYLNILDKFKKTSASITTLMLTQTFLSFWDSLNTMYLILHFYLAEGHITRFHVLLILRVIHGYISIVFPVFIMEYTADLLEDIKVRMVEQKLRCIDENRRAEITDMLNLLKEKPIRFRMLRAFPINKSFPLQITSLSITYLVFMLQYIRN*
>PrapGR2
MIPDHLFDEGINYSLLQKDMECVKRHRDVYEKSQRDYEREQRNMLSSQDSDTCEIHDQFYRDHKLLLVLFRALAVMPITRSRPGTITFSWRSRATAYAICFYIIATVVVLFVGYERVMILRSIRKFDDYIYAVIFVAFLVPHFWIPFVGWGVANQVAIYKTSWGKFQVRYYRVTGENLQFPNLKTTIVIISIGCLLLAVCFLLSLCALLEGFLLRHTAAYFHIITMINMNCALWYINCRGIKTASQSLSECFRRDVNIECTAHLISSYRFLWLNLSELLQSLGNAYARTYSTYCLFMFFNITIAIYGALSEIVDHGFGFTFKEMGLFVDAAYCSTLLFIFADCSHKSTLKVAAGVQDTLLSIDVLSVDRPTQKEIDHFIQAIEMNPAVVSLKGYAHVNR…
>PrapGR22
MALLIVICISYVAALCVSQSPYGIDGIKFELPNAAPVLLVVIQFVISMLVPFMFSKDNVIIVKSLAQIDHLLDVDEKLYRKSKRRILMVELTQTLFTFNGVKLEFISASPSIFMIGQFITSLIASFLFSKKNIILIKTISEIDSLLVSFSLSITYELYVNQDSSVMILCMAVVSLAQKLQVVFFCNYINMITERINVLNNHLRNFTPNENGIVIKKTSQLYYIGCKVENMSIKSLSIAYSLMGVVMVTTNKIFQINIFQALISIFFYIIIAIWTYIYYYRMLKDSTFFVSNLIWCIGELFFLALICYVCERVVTKRNETKAFVNEIIMNYNFSNETRGQAKTLLEVVKTWRLNIIAYGMFEMNITLLLKFVSVATTYLIFLCQLSHFV*
>PrapGR27
PEAPKINNLVESKHHVLHQIKYLLGLQMVVGINRLYLFFNNKYIITLGYLYTVVMTGFIMSVMLSNNMSSATYIVFTNTVIIEFALLSFNSMVLYKKTFKKFVEKMEMFDTILNIKNHPQLVSFTFLHLLLYIFIFAILLILDLLYITNFENVIGDKLVNYAYLVMYYAFICHDTEIIFFCVLLTMILRRVKIIKGHVGKLFLRKKKSNNQLEGLSYNANLDVSHLHNAYDLLHTCSEKLNSAMNFPMVLLFTASGLTSIMLLKNVFAVLQQTDERNKYYYLFQFVKYLVAYTIVYCMKFTILFIMPCYFSNITTTQVATMRTMLHDAINTKALGKYERRKLKAFFQLTQDSEFAYALWGVIKMDMSLPLSYCSLCVTYLIIVVQFSRFID*
>PrapGR28
MSKPEVRVNSFFKNRSYCVDRISKIFIITEMILGLNHLALLGNIKSITIKIGYAYSAFVLVVLNYFLFVNYVWSVPLTAYSCSYFITIVECSLLWKRLRNYFKHLSSFDRVVDCDIILSRTSKYNLVQCIFSLSCCLSILIVQKICYGFNWLSIIFLPMRLLHILRFYFSAHLFYPLVIRMQLVNFLFESSFPNGETIRPLDKAVKFKSHKSFEFARLIDYFNMIIKTYDTLNHAIKWQLLSMFIELFIIAMTDLYFITMELLTKKFDIDGTLMIASILTVQLIPMLSVCRSGDRLHKEVLWLREMLACRLYEGRLEKRDRRPAQALLTLTEARNLSFSLFHMFNVDISLPFKMFSLLITYLIILLQFEKVKNNIVIKPSLLD*
>PrapGR29
MFLKFNSSVFFSTFMYFRLLFGHFFDSTSNIIRLSRKLYCISFGAVMIYNCIYFAEKNPLMPLFYLPIGFLVNFTLSMFFEDLIIEAITSVADCRFQGTLSYRIITYIVIQISTIIATVLLKNSFSSTYYIIHSFVINISMVLATIPNILFFDVTYERMKSLRLAFESTNLNISVIGKNQIQHKIFNVKSTFSAYKELLNLCNKTSKQMQIGILGILIANYPNIVLFLYQVIIVYYEKKWWMIIQIILQIVNTLTLLFTPAILSELINMEYEKICDVLNRKIAACNDASLREVKQRAYEYIKLRPYKFFIVRAVPLDVSMPLSFISFCIGHLIVILQNKNSNNELVN*
>PrapGR3
MSLYKSNILYPQIPNGWAHQMENKPKNKVIFLDVTPARSPYIVRPTSKNSIIPVKDNLIIPEIYKDIVYENIKPVFTLLRMMGVLPITRSSPDKNQFNIASPSMLYSVFLYLCLIGYVLYLSLNKVQILRTAEGKFEEAVIEYLFTVYLFPMLAIPIMWYETRKIAEILNGWLDFELAYKTLSGRILPIKLYKKALAIAVIIPILSTTSVIITHVTMVHFKMMQMLPYIFLEILTYILGGYWYLLCESLSVCANILAEDFQKALHHIGPAGKVAEYRALWLRLSKLARDTGIANCYTFTFVNLYLFLIITLSIYGLLSQISEGFGTKDIGLALTAFCSIFLLFFICDEAHYASQNVRTNFQKKLLMVELSWMNTDAQTEVNMFLRATEMNPSQISLGGF…
>PrapGR30
MKPQTLFNIFMYLRLLLGNYFKSDSSQISQILKKIYCSVAGVVVLYYFFNFHDNDPLSPGYYLPFEFFVIFGLSMFYEDSIIESISSSKMVDKLLGFQGPISYRIIIFLFLQLLNICLGGAFHFKYFHHVRSDIYFLFIIYLSIALGSTPKILFLDVLYERVKSLRMSFEHEYPTVNVIGKNRINQKIFHLNMCLCQYKHIINCFDRASNQIQIGILSILVTNYPNVVLYFYRGIVTFYTDGLQLFLPLWFKIQYTLILLFTPAILSELISVEYEKIRETLRKQIATCTDECLKEVQQKAYVYVKLRPYEFVIGRAVSLKISMPLSFIGVCIGHLIVLLQNQKHRYANEFKN*
>PrapGR31
METLKRFMFYRMLFGYFYDFRSTKLVNVYKGIYCASFVLVTSVCVCYNMTFNITNSVVYTLAEFYFLIIKSFLFENKIEKYFYKILKLDKMFRIEHRIISLKMYFIFIFVFILQLVVFLLNSDKSYFIFLISLSISISYIPEIIVFDVLYSRINILRLIIQCIYCINIQRREKIFYKIFCVKKCIIYYKELSNNINCIEKELNVTLLISIIVNYPETLFQFWNFMLHFLQNDWTLYDALSAFCPAVIVILTLTITAMLANSICQECKKITNILLDQYISCQDKMLQLELHRALCYLTYRPFQFCIIRAIPLSIKIPISFISVCISHIIVAIQFRYFKT*
>PrapGR4
MKAQGKIYIKTPEREDDFLPTVTCMFAFAKTFGIPTYGGKLALIMSVTILVMLIILEIFSIWKLVRTLNGWNQNPNGSVIARLSGSIFYGNGLLSMLITWKLARKWRSISNLWLELETKCSLHFPPNTKIRRRLLFVIGYTVFCAFVEHVLSMMSSTGLDCPLQEYFERYILSSHGFLITKHEYNLWLAIPIFILSKQATVLWNFQDLIIILISMGLTSRYNRLNVFLRRLVMYENDMKEHNLQQNLVKRVYLWRRLRIAYVHQSQLVKRVDKCLGGLILLSNLNNLYFICLQLFLGISQEKGTVINRIYYFYSLSWLMFRASGVLLAAADVHLHSQKALPALYRCSSAAYNIEIKRLKYQLQHQFISLSGMDLFYLSRQKLLEVAGAIVKYELILLQY…
>PrapGR42
MENLTKDILDEEFIDIFRWLHVLQNVLGYSRVEIKDRFVTPPKKAFTVYCFILWTIIIPASTFYYTMSMELRRLDNMMIDTLYIPYQYAVMSWTASFLVYCNHFDKSDLNCQLFLKLQRIDRLLNSAFAKNNKVLSIVSNIYALSFFIGSFIWLIFLSKVHQTDGSFFLTCFMLLTPIAYSAETIIFILKLKYLIVRMEYIANELKNVHKRLLSEDLTVGLTESDSLYDTEEQRPIANLNENLVRGIHAILSSMLDMEEIYRHSVRHCL
>PrapGR44.1
MSNTEYLSKDILEEQYIRSFSPFHYVEVALGTSRIHLRNRFVTSPTLSQKVYSLICTVLTCALHVYVTITYFEKYYKYPVIYYTFVTLASMHFMTFACNIIHLRFFNTIENQEFYVQMQQLDRMLKVHDCLNNMQYLYNVYTVSASTLILFITFICGIFLHYLLAIGFIGILYGVLCCALEWMHCASLLIYFYLRIRYINAIISNHLEGKLVLSEIEHFRLPRRSLLRHLASSVHDFESSPVDLYVAALFDAYSTFQNLYRFQLLLFVGNFFMHSLLSFSAEILSAQKGLINRETWIEFTDMPAISLISMLTATAISIRCELFLREVMRTRRLCVNVLARHYDGVIRDKAKRILRTLDARPPSLSVYDMWHMHAGTLPAVTNIITTLMVAILQFVLL*
>PrapGR44.2
MAKPEYLSKDILDEEYMKSFEPFHHLQMALGSCRINIQNRFVSSPTAAQKIFSICCVLITLLLYIYSMNTYFNRYYDFEGIYVTSIISVVMYYLTFFFNIIHLRFMNCKSNTRFYIQLQEIDRLMNVNKNEKLNRVLYLNNLASAGVSVLILLMAFCLTMYENIQFFLGFIGLLYSVLVCTVEWLYCADLMVYFFLRIRFINAIIVNHLQGTVGPFEYRAINLPTFYFIRCLASETHDFQTNCVDLYLKALFEGFTSFQNHYRFQMLLFCNQFVLLSLLTFGIGLGAFQYNALRWSELINLPTILICNTLLAIFLCIRCEVLYRETKKTKRLCITMMSRYCDGPLREKAKRILKIIEQQPVKFNVYNMWSMNALTVIRILNIVTTMMVVLLQFTYL*
>PrapGR46
MKIKTINLVVKLENILCVYRNYNFFSRRNRILCNIRMLFELSLTIISTVLILSHLRSWSKFASYLLTHFNGLMIIIFARWYSQPFKKLIDYIDANQAQFSPEIEYVNILERKYKTLKIMLICYGVLSTSFLFFRRLTAYDAVPVDIQFIIFYINLRISNLRYIFEYVVMYSILSVLTVHVNCISRYVEEKAKFYESKTETEIEEENGNECCFKKWTVAYTNIKECSNLFNHIFGFQMTVILVTAMVYFIIFLYKAASIGVSVSKRD
>PrapGR5
MDIIRERPTFQNAMKLTILIGQFFGLNPVLGITNIDTKKVRFSYISVRSIYSILTIVGQFVVFLLCTTYTVMYSDTSLHSITPMVFGSSNCITTILFFRSAIKWPKLMNYITKVETIYPNIDGAFVTKCNLSCIVVLTLALVEHVLADFSKVIYVMDCPNPKLDTYGGFIMHSFPWIFTVIEYKTYLGIFVQFINIQCTFNWNFANLFVICVSIYLTSRLEQVNRKILEAKGKFRPNSFWRNMREEYNRATSLVRRLDDVIGGIIFISFANNLFFICLQLLNTLADGIKALPSCNIGNDERPLKGYEQAVYFMYSFMFLVMRSLAVSLIAARVYSASKEPAFALYEIPPSMYCTEVQRFLDQVHGESVALSGLRFFQVKRGLVLTIAGTIVTYELVLLQ…
>PrapGR52
MKITKAKGVKTFYYGNELLLPNQPYHDTFLQFMNTIFKWARCFGVPGFGCMLWQIWAAVVLTSLALTEGGAIWKVIRALAGWSRDTANHRSVTARFAGAMFYAASLISQILCWRLSYNWRALSKYWASVEWVLNIKYVPPDRNLKKRLMAVTALMATGATVEHLMSILATTGIDCPISDILKTYVLKSHGFLLLDQEYYKMIAVPVLFVSNIATILWNFQDILIVLISMGLTSRYHRLNMCVATVCSELNKERKWSKDNEILQVYLWRKIREAYVKQALLVRKINSAFGLILLFSNFFGFYFICLQLFLGITQGFTGDIFQKMYSLVSLAWICVRTCCVVLAAADIYENSKRALPYLYTCRAQFYNIEIERLQDQLDKDNIALSGLGFFNLTRTVLLQV…
>PrapGR54
MKFETTSYKNMLNLFRPVIIIMFICGYNFKTFTPTFLRKVIAQLYSLSLIIIVSYSTITCCYVINPSQFMSLLEYDFSVLNSMIYNSKILKFIANLKCLDGYLRINKRHYKIIKFRFFLIAVTLWIIRIIFTTLSCVSSNCYYSFFPFTLNIFSSLALDLNRVWRFTILNTIRFRMKLLRRRLEENPEENYYLYAVKMKTVKEDKIKFCLFIYRQIGNMLDLIQPELHAQMFVSIICGVPKLVVDIYHILLVIEEHEPMTALGFTVMHLIHVSFLLMSPSVVIELFHVEVEKIRLHLIHQIIDSNDPKTKEDAQIFLQYSEIRSLKTKLWRCIPINIALPLEILNMCYSAIIVIINFTDLY*
>PrapGR6
NKVDVSELKPAKSPATFRESLRATLIIGQAFSLIPVIGVFRSTSDVRFTWLSWKFMYLCLSLCGQIFITIMCFHKVVNSQTSLNGTTPIIFYSTTCITMLMFLQVARKWPDLARYAAKIEELDPNYDTKLTYKCNGTCAIVLALALLEHILSLLSAFAGALVCFPDMSLYEGFVKHFYPWVFNYLPYSPLLGFMTQFLHFQSTFIWNFSDLFVICMSYYLTSRLEHVNMKLLAAQGKYLPEVFWRTTREEYGRAAQLVRKVDDVISGVVFISFANNLFFICLQLFNTLEHGIKGTSECSSRNQGSTVFGGYEAAIYFLFSLIYLMARSIAVSLIASQVNAASNTPAPVLYDVPSPVYCVEVQRFLDQVNGDKIALSGLQFFSVTRGLLLTVAGTIVTYE…
>PrapGR61
MNFSIVKGILYFRLAVGNYWECSSSKTVQFSCKCYCVVYISVATYVYFSIGFEAASLKAKYDVNLFCFLIINGIFGIWNKQKYFTRFYSGIKTIDKIIHFTKRKSASLVAYITLVVIKSGFNLTGHILINERNGAFFANQMAEISKNISNLPSVMIYEMLWSRMACLRKWLNSKLIYGNLDEKQFCLRKFLHLYKTLLDNVTKVHNILVMQACMELVYYFITLLADVHSAIVLGIRKGTWELSLSILIISLTNVVLWLMGPLFLELTMNEYEEMMSLISTELMQCKDEAYRDQILTTLEYLEVRAPRYTIWRIISMNLKQVVTVFDLLVTYIIVLLSFQF*
>PrapGR63
MILKHRLPCVEEIKKSFGILNPFLRIFSLNCDVFKHKKYTVLSFVRFILPALILGSIDASTLYFKILYTYNDVVVSIRYTDAVQVIFDFFQYIVDLYIVYRCSNSLEEYYKIYEKLDEVLGTKYCGVLYGKVRKIVVIYGFIWTISCAGDYWAWLDSSGWKTASAFSISYIFVLIKIITSLDMTVHLMHIDSRLRAIGDAADSLRKKMKCSYREKIGKDASPIKIISAGTTNCNVEGVKCLGRCYVWVIELAEFVNQAFGTRLLLNTLSVLIDIIRFTNIAARILLGSQHLHKNATGIFPVVSTLMRLFTCVVMVISLAKHCELVYGQRERIINVIDRALVFNEPSDDLKSALNEFRVLIQYRPVEFCMSNLVRIDYSLLGSMASIVVTYTIILLQNVN*
>PrapGR64
MFSFRNVSVINCILAIRLCFGHFCELSTSKRINFICKYYCVIFNAYQIYFWYNNSVFSSTSRFLSLQATFIFFKAIANALITFYFKESYFFKYCAVVETMDNVLRFNVKYTIYSIVVCVMSTMCPIISAIFIFKILSVSVLFKVGSYLLSDISIMLGYIVTLISYEMFWIRMKLLKDYVEQYILNGDLNLESKNFHLKQFTHAYKSLLDAVNDANAALKVKMFTDIIFIFSKTVSETHYHIVAFITNGFSTGMFMPIVTISAHFNLIFLSIIFLELVVKEYEQIK
>PrapGR65
MFNFNNNFSIKLLLGFRLLLGQYCEFKTSKIIRVLLMFYCFVFHILMCLVIHTYFDSIKLIELLWYIKLLKILVPVKVITNLCLSLFYKEKYFLIFYKNLETIDMFLKYNKKCDACISIGIFSVIIFGQLIFEIVIFYPRDIIYGLEKFVDLVLFLNLIIPYLIYEMYWQRMKYLRLFLQSKCVLSDDVNIKIFHLKKFVQIYKHLLDQVGKANRAIKVKMFFDIIFSFLKGLIDISVGIKYLIQLDSYQHFDIVTLILLPILNLSFYLNGVIFLDLVYDEYENIKASLVMEQVKCEDNKLHEEIVIALEYLEIRPPRYSVWRIFPLNFNLITAFVNNSVTYIVVLLSFKFSSK*
>PrapGR66
MLLRKLLGASFFSLKWSRDKVVATFSYLGFVSFNVWYFLYFWSMYNVFIGDQTILRILFETKIRQYGDLVENIAITVYVVYTMWKISYDLSGSTEHIHQIMEIDAEIEKLGERRDYSKSATLSLFVLITHFVICFIRVLVVCISMGNRKPSLHYSKLFQITFSDSLSFTVTNYFCTYLYALRDRYKRINQVLMGLGTRPDKNLFVRNINPIDVYRMEDRYVCKKINACGKVYSMLYKASETANDKFGFALLLTMFVWLIITVLYLYYFMEATAAGLFHDVQRYIYFLVYVSWQIIFAVAIISSAIYFCENIVKEAKLTSYLVHTIISDTWDISVKEEALRLSIQIVHQTPKFTARGLFIVEYELLLEVGNDIIFIIL
>PrapGR68.1
MTSALRFLPLRNMEQIEIQDILTPIILAGSCFGLIPNSVKFSKAKQIYKIIPKSIYLNTLCVAFFLTLHITVLMYQLYLVFYIEENTNTSKKLNYAMELINFIIVSTTTYIYAYVNRAKYLKIFNMIVSTWSGIPQSPNSRSILRKLYVETNMTLIVILILIVLQIYFNTKQENILQKFVAGITLNMPQVIQFCFLAFYTTQVRCITAILARITEHCNSLKLSDEANMSIRQMELIYMKVFEIKMDINKVFEGPILVSLFQSFHALVSEAYLIYYAGLHTSNTSKTFVYNNGVWVTCQFIKIYLLSYSGNSLKAEAFKIGEALHYMTTEGQGLRWMMEVQHFSTMLKYQSMDISVFGYFSLNASLMFNMSASAITYLIIMVQFA*
>PrapGR68.2
MSTLRKILPCCEYKQEFTNDREEIEDIIKPIITTATFFGFIPISIKFSKIKQIYVPVPKSIYLNSCRCVTFILLNIVFLSFHFYLLFASPGGANFANLPKRINYVFENLNFLIVCITAYVTGFLNRYIYLQILNRIICTWTKMPPTDNSQKILKKIAVQCHVILLGITVLWLFLVYFNSKQDSIVWAVVIGMSLNMPQTIQLFFHGFYTVLVILLAAVLWKITEQFNSPTQTVSIIEVRPTQRHLTLVDMKSLYIEVYEIKLIIERAFKAALIYSLLQSFHSLIAESYFIFYGILYSKNIPTYLIFNCAEWILCQGIKVYSISYSGNLLKNAASRFAEALLALPTEGQNIRWFMEVQNLSTLLKYHSLDINLYGFFSLDATLLFNVLATALTYLIILAQ…
>PrapGR7
IIFRFTWKSIYAISCLFIIVLQFFYLSIHIYDYTFQEDISFRHTIRLIDHMTSTMAIIIFIKSSLRWKTVLENINKCERLLKSLKNSKKFVTLSKRISCIFLLPHIVDQALVIATFMSFIHNCFTLTLREEIQLYFKTYFKKHFVYVPFNLATSMIFQFLRLQLNFVVSGVDFFITSHALYLAMLFRNFNRNMRRDQVKFAGNKMYWANIRMQYTRLCHLVTNIDNVINPFVLISLLANLLQNCKLIYVILINRDFSDGRSNSTQCAYDYGESTLDYIQQYYALLYSIAKTFSTLAAMAWLHKLTRVPLDALFEIGPNDYNIEMQRFMDQVHNCMIGLSGFKFFVITQSTILTFTSTIITYEIFVLQLMYIYE*
>PrapGR8.1
MATDGSCVVNGSFLFILRVSRVFGLAPISFKTVEDGCRIEILKSSYYEYIFMGMINVLQIIFYFHNLVLWDILGKLHVILFIIKVINWVPLLMFLNIAVLSSKTRMRVFLECVPINKTYNAVKERRRYTLITLFTTLRIGLCSLPFIYATKIEVTVDFFLGVFFQLLLTVIELNVCFIKLELHKYLETIKIELAAITADIKSDKKTKPQMSDILISLRALSKAFVTVCDVCFKYNDSENLLALAISSLCTLNLIRTLYSFSRACTATDVDHKTFQIFVEFCSLVLHLYRIFLYVDSSSEISKEVDEVRYQLANLSQLVTSVGKIMPLEAEIFQFVVLINNPVLNPMGFFTVSRGLLGPILSTVVTYGIVTVQIG*
>PrapGR8.2
MSRSCVVNGSFRFLLRLSRLFGLAPITFCPVEDGFRIELLKSSYYEYIFIVLIDGMHFTSLFVYVISSKITEDIHVISLGLRVIDWIAQTIFLNIAILSSKRSLESLIDCVPINKKNNLARERRRSLLIMLSFLLRIGNSFLPYIFYKKFEVDVFTRYLLNITIQVAQNLIELKSSFIKFEIHKYMETIKFELMDIIADIKSDKKTKPPMCDICISVGALSKAFVSTCNIFFKYNTSDNLLAVILSLMFTVNLVGTVYNFAVTFTSTGSEYDVMQSCLELNFLILHIFRAILYVEASYQMRKEVDIIRHQLGQLSELVTSDGSATPSEVEIFQLIVLVNYPETIPMGFFTVSRELLGPILSTFFTYGIFMVQISSILTKSNNAK*
>PrapGR8.3
MGGSFVVNGSFMFLLRLSRLLGLAPVRFKPVQDGCRIEPLKSSSYEYIFIVFLNGIHFIILYFDIISPGITGNIHVISLILRTLFWTTQTIFLNIAILSSKGCLESLINCVPINKKSNLARERWRSLLIAFYILLRIGCTFVPYIYTRKFKVDIFADCFLNIIMDLLQSVIELKSSFIKFEIHKYMETIKYELMDIIADIKSDKKPKPPMCDIRLSICALSKAFVSTCNMIFKFNTSENLLAVTLASMITINLVGTVSNFAAAITSTDCEHKTEKSCVEFAWLILHIFRVILYVEASDQISKEVDVIRLQVGELSRLVTPVGEKIPLEVDIFQVVVLINYPETTPMGFFTVSRELLGPIFSTFVTYGIVMVQISSNFNY*
>PrapGR8.4
MSPEPKVSTWQKYYGLFIILPWINILFFYTTYREIIHIKEGSAEIWTVVFIIYTTFSLLYVNFAVWTAPTRIYSWLLCLRNIEKILVRTKKTEEKELFRCKLLTVYFLILLFAMITNAVEVCSQVNKCTFICVFYKFNISLFYGMCTICDSFLFMILIVRVHRATIIMNEELNKLLHQADVDKMPILRNNYMIGSSFKAFKRSHGAAKVRELSSTYLSISEVIKTVMETGEVGFFLYIMGNLIHLMTRVYNYVRCHFGHQDEIFGGHLILSNILEIFWCTQTVVKSYLFCEGPHQIHNKLQETQELIARLKKKYHEDKISNELHLFLRLTMLSRPSFSPLSVCTLNRGLVAKILGCTATYLMAFIQLEINKK*
>PrapGR9
MEAETQASFTFPPEGPREYHAVGECTVGGAHAFILRISRVFGLAPLRFEARGESWAVRVSPAASLYSYILVTTLVAGTVCGLCAELRAGTAASPRMASQTAQLVSACDVLVVTLTAAAAVYHAPERMRIIIAFMDTIADVDESIGAHFSRARERRVSGVVLAILVFFTLLVADDFCFYALQAKKIDRHWEIVRNYCGFYLLWFVVIVLELQFAFTALSVRARFRALNDALALTADHLCRPGNYFPVEKKLNVFAFHVRARSRRNSAPPSRRNHLIVRRDRGGGGQLAVPAGEALERLAVLQGALCEALHRLDAAYGLPLALLLISTLMHLIVTPYFFIMEIIVSVHRIHFLVLQFLWCATHVLRILVVVEPCHYTITEGRRTAELVCRLLRAACSGRVP…
>PrapIR1.1
MLLVFETNLPIPLMLWGFIGTVAAWDLRFVLDYFRRRDVRQLCLLHCTSPNDELTFCNTFIDNNVRISTCRINKDITKIESVLRKHSVPVGVLLNGSCDNTYNVLDKSSKSGLFDAMHIWLILENTSATRNMTIDDMMLQMNLSVDSDVAIATFTGSRYELTDIFNFGKIQGNELERKFLGAWDQTNGLKISSKSYKFYDRWDFHNLTFRVVTVVVGQPKTFEPDMLTSISYTKGISVFTKTAAILLDVLKERHNFRFNYTVAGRWIGPPDKNASLAVTNSLYWGQQDLSCTSARITSERLQWVDIFNPPVTQIESRFFYLIPNKGVGNYENRFLTPLSPAVWWCSVGAGTFCVLVLAVAAVLERRPRPAVYAMLSVLGAVCQQGYEEGTGIVEHRYSS…
>PrapIR1.2
MRFQIVLLYLAKFSIAFSQESVKIAVSYFQERNVKNVCLLSGSNNIGIQFTKEANKHSITVLQYINNDKSKSSCQRQINTHTGIVLNTDYPTFQDVLVNASENNKFDSNHIWLIFHENNSTEINTIFSILNLSVNVDVTIAQRMDSGYTLYDIFNFGKIQGGNIQKEITGHWSQESGLIVNKSFKYIRRFDFQRLALRLMIVYQGKPEEFRPEIILERDVAPGISLVTQTSGMILNELANIHNINFNYSICDRWVGDYKRESPNAVTNSLYFKEIDITPTLRFLPSHMDYYDVIHQYVTYAEGKYFYRIPTTGVGKFENQFLTPFTRDVWLTVIGVISLCGLGLLLSAKLENRPKSGHYAFFSVVALSCQQFFEDIDDSVVQRNSTARKLTILVTGISC…
>PrapIR100a
MTFTNHKDYIQMDVWTMYSKIGIFFTIISVGCGFEISTINHEDNKIDILTTIIKENYVYNGRHTFLLIGIFPDQFYSKLKHLPVTFTITDINKEDEQIEDVVPYPSNYIVFSCQSRNEFESALFKVVTLPYWHPLAYIILVYQPSYDTLSMAEMFYAFWYFKAINVIIIHFADLQEITYISYFNPYTSSSFELDHIFGCWSVKKNTMPISDLDGLICEQGCHNVSIYSKLRSNNLGTCLSFSTSALSYKNPESVKNLILFEDKSANYHNYTMNSFAIQLDPFLNIKADNGTYTLHKRDGQIWNALSKLMNFSIDVTMNEPIWKHDFDYITNLQEFVSFTQRKKDLVLLPMYQFDVMVVELDNTVPLQDSGVCFLSHRAGFETVIFDLKLFKNNIKMIFE…
>PrapIR100c
MLSTRTIFLLFIQFTLSNQFILDSEDNKTAGCVRDIILNNFEMKSQITVIDGDNYKILPIINEMHFTSVQILTSDSKKFSLPFNREYLIITKSCVDFEIKFHRITISTTWSANAKLLVVIKNVYDPRCIFDILLKKHMTNVVVLNDTATLELLTYNPYEDFGCGKRYNRIIKLGHCKRQYLFFDKLVNGIRNCTFQALSAHMPPYSIDPASNRSVYKGVEQYILELISNKVGFKINFTFKINSDEFTVIADNMSAVGPLSALQTGEADIITGGMLLTYQRAMVLDYLTGGVTFTDYLQLHVATAKPVSNLKNIYSEFQCWVWLALFNVFVVYSVLMYLIMRKRPKQTIVLKMFGFFLQQGSRVKGDRTNRVFICWIFFAYLINCYYQSSLVSFTLHPHL…
>PrapIR100d
MKIPILLIYCVVTCYGDLELLLNANDNISSKPDDCVNDFISNHCGSHVSIVLSPSNIKFIPINSNCVTYVVRSYDHNQWFTTTDIYIIYLKNLDISDWELRYEEMWNPRAKFIIVISHKVTKLDLKKVFDQLLQLNLFKVFVIINENHTQETFTYYPLKKGNCGKRFDKIVKLTSCYDLENTTPTNFEDCSVNVLIKEHRKSTDEYLTSFDQYVLNLIAEKIKIKFKYRFLNTQIGGTLLQNYTMTGTMKYLQNKEADILIGGYLLNAKRTIISDAIYVQNYIMVKSLLPCENQHLWKIIFTAFKSDSWLIILNSYIFIVLAINLMSHIIDLRINHIRLELLDYFFGHGGNTYFRIKRLRIILTIWIWYTVLITNFYSSSLYSLLTTITHRFMDNKNVS…
>PrapIR100e
MASMKVVLHLFPIILVKYCVLSLANNSAILNNVFNGENYLTSECVKKLITDYQCGTHITIVVPNVNFQNFININSSCYDYVVITYEPVEFPFNTNLYLIYYKINTTGSSLWKLRYSKYWNPMAKFLIVTTSEVQYPELKKIFRKLLKYHIFYVTVLTQINKAQGSWTFYPLKDGNCLSNYDKLEYLGSCVNNDIFPVAKVLRNCTVLVTGNKIVDKKSYINYIQYLEEYLIRVSAKAIGVKIKYSYEDYDTNDGEVLNNYTSIGMLNYLQKRKADIVFGGFFLTERRAWIYDFISGYKYTSIKLLVPNSGPKRWKIFFRTFGMRSWSLIACAFISMIVLTMAISYYCLHIKHISRIPLHLFDYFFGHSDRNLFKVKKLRIILISWVFFTFFIASFYNSE…
>PrapIR100f
MYNCYLPFTISNTIKQGIVSRLINRTKMASMKAVLHLFPIILVKYCVLSLVNNSAILNKIYNGEDYLNSECVRKLITDHQCGIHITIVVPDANFQNFININSSCYDYVVLTYEPVELPFNTNLYLIYYKLHTTGPSLWKLRYNKYWNPMAKFLFVTTSEVQYPELKKIFRKLLKYHIFNVTVLTQINKAQGSWTFYPLKDGNCLSNYDKLEYLGSCVNNDIFPVAKDLRNCTVLVTGNKIVDKKSYINYIQYLEEYLIRVSAKAIGVKIKYSYEDYDTNDGEVLNNYTSIGMLNYLQKRKADIVFGGFFLTERRAWIYDFISGYKYTSIKQIIPNWGQKRWKTLYRTFRTKIWYLIACAFISITLITMAISYYCLHIKNISRIPLHLFDYFFGHSDRNL…
>PrapIR143
MKTVSLVIYLLLSYHNLGINSQNSESNINVLLSKCVVEIAIRDLNYKPTIIINDPVETKSKNDLFKSLVTEVHMSGIPSTIISEDIWYNNTVENGDILLILIVNDCSELKNLYLKSKEIKYLIIFQDQINCHHFDTIQEMISHNVVIAEKSNSSDDFTLNSAIYDIDESTCHIINVVRLEEVNVCINGSLNRRNKVFAERSIMNLKKCSLNTGIGELYPYMQLSNKTRKYENLNSISEAEIRGSDVVILKILSDYLNSTINFFFIYRDQENPYVDQTFLSLLLNGSLDICAGGLYRIYGDIVDYSGVYTRQSVVWAYSVEREIRSWQSFVTKVDGLYFFLIFYVIHVLMWKMICKIDKDMFSLKKTLLYSWGALVGASSLHDARTIKQKIVNCMYLILC…
>PrapIR2
MNTTYTVGSLLNCENIQTLNEHEHDPVWRQTVLGCYVLHILKDILQFNVTYAPRLPPYTDDYEVPMANNSIDIYVRPMMFKKEYLADAYPINFIFQWRFGFLLRFKRTELKAFFTLPFSSLVWTCIIWTLFLSASVFYLLSYWEKRLLGGERCLQREFLLAFSAYCQQILPLQANLSSRRIAYVIFILCAYVIHCFYTSTLLSHLVNDKDKGLNLEDLANTDYEFVIIKDMNLITEKHIQKVSKDKYLRIVEQKIYKSKVMDVYSALEAVRDTKTAVLTDYITLYPLIKRLFDNQAQCELIEVNLYSKVKKYMFTSRTFPLTEQFKVVTLRLKEAGLLTRILQCDRLSISCNDIVNQEQAGMSCISTPLMLLAGSYAVALLILIIEKIHFEFCHLWPYI…
>PrapIR21a
MNVLILLYSTCFMFLRVKGEIEYYPSMGEIKKTQKVQLHTRFNVLQTSKYVNKRGADPVFHGHPKTREELWRERFLPEDKHFDQGPSLLRLIHNITLKYLTDCTPVLLYDNQIFSETKLFQDLLRSFPVTFIHGYIDDNNRLEAPNIIQAKEDCLHFILFLTDVQKCHKVLTTQSNSKVVVVARSSQWAVQEYLANPSSRLFINLLIVSPSFKDDDMTLEASYILYTHVLYTDGLGSSKPHILTSWTHGKFTRNINLFPLKMMEGYAGHRFLIAVANQPPYTIKRSLIDKTSGAIKTIWDGVEIRIIKLLAARNNFSIEFIEPRELNLGSGDSVANEVALGRADIGIAGLYITAERVRELDLSIGHSQDCAAFITLASTALPRYRAILGPFHWHVWVAL…
>PrapIR25a1
MLLFLTFIQTIFHYALSQTTQNINVLLINEENNALAEKSFEVAKEYVRRNPSLGLAVDPIIVVGNRTDAKAFLENVCRKYTDMVSGKKPPHVVLDFTTTGVGSETIKSFTSALGLPTISGSFGQEGDLRQWRGLNSNQTRYLLQVMPPADLLPESIRAIVTKQGITNAAIIFDEFFVMDHKYKSLLQNIPTRHVITPVKSFSKDEIKTQLRSLRELDIVNFFVIGSLRTIKNVLDAANENQYFGRKTAWFALSLDKGDISCGCKDATIVYMKPTPDAKSRDRLGKVKTTYSMNGEPEITSAFYFDLSLRTFLSIKSLLDSGKWPNDMKYMSCDDYDGKNTPTRTLDLKTAFQEVKETPTYAPFFIPEDGSMNGRSYMEFTTDLSAVTIKDGASIGSKPL…
>PrapIR25a2
MLLFLTFIQTIFHFAFSQTTQSINVLLINEENNALAEKSFEVAKEYVRRNPSLGLAVDPIIVVGNRTDAKAFLENVCRKYTDMVSGKKPPHVVLDFTTTGVGSETVKSFTSALGLPTISGSFGQEGDLRQWRGLNSNQTQYLLQVMPPADLLPELIRAIIIKQDITNAAVLFDDYFVMDHKYKSLLLNIPTRHLITPVKSFSKDDIKTQLQSLRELGISNFFVIGSLLTINNVLNAANEKEYFGRKTAWFAMTLDKGNISCQCNATIVLMQPTPDASSQDRLNNLKTIYKMNGEPEIISAFYFDLSLRTFLAIKSLLDSGKWPKSMKYMGCDDIDGKNTPTWMIDLKTAFKEIKEAPTYAPFFIPNSGSMNGRSYVEFTTNISAVTIKDGDLIGTKLLG…
>PrapIR31a
MLSKTFQCRKIIMYYEAISLAFRYKIVGSIIIFTCSNKFDAVKTIRNFQNLNLPTTVTCNAKIFQQIHHHRLQGVLYIPNNYDELDQVPSKYFSNWYKWIILADRIPDALNKVRYDADIILIKPGKYGTDRKLEDLYIHPYYGASAHPWAFHNDSGLHVTYERERIHRRLNLHHYPLRIATPLGTYSNDSYNGTFIDYLHDMSMPERDSGVRCGYTTSSLIVESLNASEILLPTMLWSTEVHNSSMLLKLRYGTADLSGGVLRIMHSRYEKLDYTMCIWPFRVGFTYLAERESSNNMFVAPFTTAVWICCFALFVILFLAQRVTAKSEMEKEGAYIAVLATCLQQDASAVPQGISGRWTFLVLSICAMLIHAYYTSAIVSALMSTGRSGPDSLKSLGDS…
>PrapIR4
MILRFMKCLVVNGVAVALNVDKKPRFNIKIGVVTLSTNLARNTSVLAKHIKQLNAWELNSASSEWIIALKSIYDMKYIYKVLNTSEVRYDQNLFVTLPHNLHKGNNILYPNTFDNSLKYQRNTANCSKQHFHYRNCIQPEKALRYCRTSNRFMNLARNKSIFRNGQLVPLHGSGTIYNYLTGRFHMTNASELILKPDLYTKNETIHVVQYFKVRVNSTLYASHLGYWTQEQSMAIIEIPYPVEARNFMGEKLIVGRCNYTDEKPVPDQDGPSAPGLLDDLLHFLIVRMNGTSLTRYYSKLGFRTYEGAWSGLLGALLDHTVDIALEPVTEQVSSQQEMDFIFPIAETMYNIYIRNQETSSVRDIFLAPFSTRLLICVAIVLVVSAITIVIITNISRKFL…
>PrapIR40a
MLPKDFSRAIVDLAAGLPTRAITIVRGNSTNISTDVIDNLIYALSNNNIGVVYMNFRENNSKSTYYEHQRKGLDTSEERTSFILCEAYECENIIAELTDINFIHRSMLYIFYWEHGAVSRKFCDSIEEAMRVVVVTRRKRVYRIYYNQATPDRLNHLSLVNWWSDRLYKNPVLPAADKVYKNFRGRVFNVPVLHAPPWHFVNYKNSSVNVTGGRDDKLLALLAGKLNFKYKYYDPPVRSQGSMISGNGTFKGVLGLIWKRQADFFLGDVTITWERLQAVEFSFLSLADSAAFLTHSPDKLSETLVIIRPFQWQVWPLVCATFLVIGPALWFVIATPIYWQRRQRNMLQLLDECCWFTTTLFLRQTSNKEPSRSNKARLVSIIISLGATYVIGDMYSANL…
>PrapIR41a
MLLAPDVLLPIELLLQTLVDHYLNTSYCTTVITETPLQILPQISHHYILLNHSLEDVILDASEAGCSDFIVQISEPKRFFSALDYATHRGILRRSDRKIILLPLNNTEDISLLDVLRMKESSFVVNLLLVLPSSSHCEAFDLVTHKFIGPVDNDMPVYLDRWNSCSGFEKSANLFPHDMSKLDGKNVKVTCFTYTPYVLLDLEPEIVPLGRDGVEVRLMEEFCRWVNCTIEIISDNGEEWGEVYENFTGLGVLGNVVEDRADFGITALYSWYEEFLYMDFSGYGVRTSVTCIAPSPRLLPSWTMPLLPFSIYMWIGLLFTFIYEAFSLFVAQHFSAKNIFLTTFGIMITQSQSESNFKSWRIRSVVGWMLLTGLVLDNAYGGGLASTFTVPRYEPSVDT…
>PrapIR64a
MHFMANISYWISLTDIAVIINIFKLKNVANVILLHCFELHHFHQAQKMFIENNIRVAVSHINDTSARNWLYTDSRLGVIVDTSCNFWETSFSAFHEPFQSPLSWILKSDNILKTKDILSQYPIEFTSDVNVLCNRSSSYKIYDCYNKRYNRKDSFILSEIGYWDGNLSLLTKRNKQLTGVRLQITVVYPDPISHITFHSFLNLHKKSQIDSLHKLKFFTLMMYLRDMYNFTYNLQRTASWGYLRNGSFDGLVGALQRKESDIGGTSVFFRKDRSEVIDYVAETWGSRICFIFRHPKHPGGSFAIYARPLVNAVWYSTVGLLLLIGAFLYSLLKLNTILRPGGSEDTTPSLTALFVFSALGQQGMSIHRGSTAVKITIFITFMFTLTLYQYYNAMLVSTL…
>PrapIR68a
MAGLLFFLLSGLFFNCGLCDIGSIIKDINVRKDLQNIIITILNDLAKRNDVNCVTAITDDIYLNVFDGGFFRRTRSLPFLTIVVQENEDLLSPNFDTLESISRAKDDGCNLYVILLANGLQVTRLLKFGDRYRLLNTRAKFIMLYDIRLFHSDFHYLWKRIVNAIFIKHHKKVIGKLKSKPWFDISTVPYPNPIKGVFVPRRVDIWRNGRFQYGKQLFFVKTSNLNGEVLNVVYLEHVPSVVIMKQNVSNKVSGVEVEILNTLSQKMNFKPKLYQPINADVQKWGEKQANGSYSGLLGEMVSGKADVALGNLQYTPYHLDLTDLSIPYTSQCWTFLTPEALTDNSWKTLILPFKLNMWIAVLLVLLVTGSIFFGLAHYYLNLLTFREDLKDSCQVNKDI…
>PrapIR75d
MDLSSFILAYFSSKNLSLITAFLCWSPGDISNLQLRTRSTGIRLRVYISEFSVLPEMPAYRIFREGMVLDLSCPHAHLILNKVYSNKILFMINASVSRAFNHRHSWLLLPEILSNDTDLVDVLQETVILPDADVVVAFPDKLLDVYRVKIEQPITVLDIGGGYINSGNLNSLWATIPTAVKRRKNLGQIYLKSATIVSQPQHFKGWSDLHDRQIDTFPKLTYPLMMLLAEDLNFRYNMKQVELYGEKQNASFSGLAGLLQREEVEVGVASMFLRRDRWDVLHYCSETVELVGAFIFRQPSQSAVSNVFLLPFSGGVWAAVGAAFAGGGVLLAVLGYVARRRQLPDETAERLTLSETFTFAIGAACQQGSDLSPEIISARILMLFMLLSSVFAFTSYSAK…
>PrapIR75p.1
MNLMYILFLTGLHFIYGLERSVFNIIGSFVVSEEKPTSVLIPRSCWKYSEIKMLSKIMFDININVGYSLQPNRSEYFAHNILILADLSCQETNLFLIRASAQGYFKSPYRWLLLNTEGNNFDVLDQLDLPLNSDVVIANVGFDSTVFIEAYKIRDNSEVIFSTRGEWRTARTELNFNKSLIIYENEKDENNIRKDLAFGIINNDRNVKILSKRRKNLRQYPLTMANVITDSNNTRQHLDDRLYLHQDSITKMSYMVVKICFEMLNATERLLFTHTWGYKDKNGNWQGIVDHLLKKEADLGTLTIFTQERMKVVDYIAMVGSTAVRFVFREPPLSLLQNIFTLPFTGAVWMAIVVCVLSCALFLYIASKWEATVAMHPMQLNGSWADVLILIIGAVLQQG…
>PrapIR75p.2
MMSCRLVIYFIFLLNTIVYGKDTNTINMIRSYVANEWTQTIVHCNLCWEKAAQIRLHKELTKVGCRVSSTMEPRSTRQDHNLLFLNDLNCPDAEQPFKITSLLRFPYRWLVLYDDMNNNSTNANGESFKERLLDLPLLADSDFVLAERKANIFLLTELHKPTPNGSTYSYPRGFYNGSLQDLRPRRELYWRRKDIMGHPLTMSNVIQESNTTKYHLPREDRLLLHYDPFAKICWSHVRMAFEMLNATPRYIFSYRWGYIKDGQWSGMINDLRIGRADLGTNCVANSKRLEVVVFTDSIAQFKVKFIFRQPPLSYLANVFALPFSMTVWVAIALSTVLATVSVYFASKWEVKRIGLNPSQLDGSMGDAVLLTMSALSQQGCSKEPKGLSGRIMLWVIFTA…
>PrapIR75q.1
METKLTMQFKVLFLFLFFKSSLSINLNEIKMTVDLVKSFNKPTAIFAFICEYKQNEIVQMAKLLSQHSLCYVFNSDDFNKIPQNKDVFIIVDLNCPASKSLLQMANDTHKFRNPSRWFIIEQVEKLGNYNFLFDSNVIVAERKEKLYSLSVIYKSHNHGVLIKESFGTWTASKGLNKSREMDKPASMRRKNLMGLPIAASIVISDNRTKTEIMTLRNIFVDTVAKSGYRQICPLYDFLNASMVTMYTDTWGYQTNGTFNGMVGDLVLGKAELAGTMIFITKSRLDVLEYLAYPSPPTTKFVFRQPSLSYQNNLFILPFRPKVWLCILGLIILLATILLINAYWEYEKLDIRNNNDQTVLRPNIGDISILVISAISQQGSSTELKGTLGRVVMFILFFAF…
>PrapIR75q.2
MKIQYKEIMRVLLLIVVCIIAKKCFAEHLNTDLILDLRNEFGKRYSLVFLDCYNEDELRKMSLDITKKTDEPITVQFMNNKMDNVKQNIMFIADVGCSNIKQSFVTDEAKKLFRPPFKWIFLNKQHLNLSDSVLCAGNVQLDEDVVLITNRKDIYQISFVYKITNISNWKVERFGEWSAKFGLKKNPEWIDVTSLRRKNLGLNTINVCFVITDNDSIYHLTDGKNDHIDTITKVNYPTINHLLDYLNASKNYIFTDTWGYKNNNSWNGMTGYLVRGEVDIGGSPMFFTTQRMSVVEYISSPTPTRSKFVFRQPKLSYENNLFLLSFHKYLWYGSVSLLAILFIALFFITLWEWKKTRPKSSISQDSTVLRPNVSDIAILILAATCQQGSHTELKGSLGR…
>PrapIR76b1
MAGLELIFSTVCNVTFCGTIDDNPLHDSKPEVNQLENFVNGTHLRIGTYNYYPENWVEKTENGTYIGRGAAFDLVHILQRKYNFTYEVVVPEGNILYGDDRSLESLIGLLQSKRIDMAAAFIPIIKNSDQFITFSTVIDESNWMMLLRRPKESAAGSGLLAPFDENVWLLTLAAVIIYGPCLTLLTKLRSKLMPDDENYIRLSPSFWFVYGAFIKQGTSLSPSTNTTRVLFATWWLFIILLSAFYTANLTAFLTLSKFTLDIETVQDLYKKNYRWFTSEGGPVEYAVKNPDEEIHFLLKTVETGRGSFLSIADTSSLLTYVSEGAVLVHPSVSLQYIMYNDYLQKTRLGVPEAERCTYVVAPGVFMTKKRAFAYQHKSKLKSLFNPVIKRVIYSGILSH…
>PrapIR76b2
MAGLELIFSTVCNATFCGIIDDNPLHDIKPERNQLENFVNGTHLRIGTINNYPDSWAERTENGTYIGRGVAFDLVHILQKKFNFTYEVVVPEGNILHSDDRPQESLIGLLHSKRIDVAAAFIPILKNTDKYVTFSTVIDESNWMMLLRRPKESAAGSGLLAPFDENVWLLTLAAVIIYGPCLTLLTKLRSKLMPDDENYIRLSPSFWFVYGAFIKQGTSLSPSANTTRVLFATWWLFIILLSAFYTANLTAFLTLSKFTLDIETVQDLYKKNYRWIAPDGSAVENTVKNPDEEIHFLLKTVASGRGSFLSVRDPSSLLNYVSEGAVLVHPSVSLQYLMYNDYLQKTRLGVPEAERCTYVVAPGVFMTKRRAFAYQHKSKLKSLFNPVIKRVIHSGILSH…
>PrapIR7d.2
MTFIDRPSPDNCSVFDTLAITAAEVALNNFRWQYASLILFNPSFFCGVNVFLKFYQKSIIIGQSTFNPWVLENTKQFVLFISDLTDLLDFLDWLRTQRFNNTGKYLVICNTIAGWTCDESVAVNLLWKYRMANVIFIKYDEFQKPIGYTYFQDSTCRNGPPIEVENWTTCIRSKNSTKCQDMFPIKFKNLHQCPLIVSTFEQTPYMMLENGTPTGADGDLLRVIIKALNASLIMVTPKLGSGWGKLEENGTWSGSLSDVYYDWANFSMTSASITLHRYRYFQMSKDYNTVTIVWITHPSNPEPSLFKLLRPYRKEAKIILFLNFIVIMIVVAILKSKYWASIRNRFKINDIPDGIVFYSWEICVGLPASKLPKKWSLLYFTFLWILHCYLLRTLYQVYL…
>PrapIR7d.2.1
MFERYPVEEIIELMAQNAAQVAYHSFKWQYTTLILFNASCLYGLDVFVKLYDKNIKLYNVMESVPDLKSVDVNQFILFVADVTETQAVINAIERQNLNANAKFIIICKHSTECNEAQAVKIMWTYRIFNVIFIKNEDSLISGYTYFRNERCDHPIPRRLEHWDKCINFSKKVIKLCKKQMFPPKFRNFHRCPLIVSTFEQRPFMYINDGVPYGADGDLLRCIVHTLNATLVLISPRDDGGWGSFENNTWTGSLGDVYNDLANVSMTSASITFNRLKYFDISINYNSLDLVWVTHPSEFESSSHKLLKPFTGKARGLFVVTFMIPLIIHILLKLRIMEKIKTRFNIGLSSDSFLIYALQISLGFSVTKYPKNFYKHVFLFWVWYWFFVRTLYQVYLIHSL…
>PrapIR7d.2.2
MSGVLEKDIIESLNTDLLAESAGYIAYHTLKWQFATLVLFNATYFYGVGVFVKVYGKKVKLNTISKSINDNHFVDDTIQYVLFLNDIPDIVLTLEALKFQKFDPNSKFIIVCYDENECDENETIPMLWSYKILNVIFIKYDDKSVSGYVYFPNENCYHPTPERLQNWEDCIHSYKDSKQVCTTRRIFPLKLMNFHRCPLIVSTFELNPYMFIKDGIPSGTDGDVLRITGEAVNASLVVISPRDGMGWGYLVNNSWIGSLGDLDKNIANLSFTASATMNLERYHDFDISTIFNTITMVWLIHPLRLESSSVKLLKPFTTSAWCFISITFGIFVLSHYFIDHSVWKILSKVKRIDKFSHYFIVYTVQITLGVSVTNYPVNFCKHLILYWIWYWFLVRTFYQ…
>PrapIR7d.3
MLLLLALIIVIKHSTSADLHNTAAFIANKEFSSNYPTTVVWWETAPENIHHFTKVYKGLVVTLSLNYKNVNETVSTREFVYDQTVIYVKHVEEFSLILKMLKLSLEPIQLILVLIEVNHSRITELIQVAWKNEVAQIIIVTTNRKKEINLYTLNPYTPGDCGNITPVEVPVHVPRFFIRKFLNFNKCPFTLSAHTSLPYIKVIKENDKIILSGFESDVINLIVERLNATLIVISNEEQERDNIANDSLKVGFSDLISKVADVMLPAVFVNEKRYSVALTTYTYNDLTIVWIAPKQRVIYAWAKLILPFISRITPLIILTFISFIAVVKLILRFGRYHELKEKTVIFQSFTILLGLQTKFETKCWLRNTVYVLWVWYCFLIRIAYQGDLINGLHKVILEP…
>PrapIR7d.4
MLIRLRDLSPHYRLLILCAWILMTSHSYGIVAKSKEEKIIQTVVQVANIDFEYRTKTTVIARDVNSSLINNCLKEFKGSVIVEAKDKVPKQVVLLLNSYYSFVKLFGVLKPDLTGKTILHSGAKFLIVLFSKPKRLKRIFSHMWSYYAVDVLVIVFTKMDKIALYTYFPYKNPSSCESVQPSLIGLWGETDIDPNDFYPDKMSNMNGCPLFISTTKVYHPATERKIPLQMIKKSMYHILGDVMNFKPVISNKKYISIDSDGAVNWTKSLNDVIAVCLAEAISEEQCGYVLPDSILMVPLVVWMPESSPFMKPLSVWLPRLLESGLLIKDAEQKPLKDVKASDTSPLTQRQASSCFIFLILGYILSVIVFVVEILIVRWSR
>PrapIR85a
MKVVIGVLWLLPCFSLCLKPNSILYKEIFEYHNETFFKAEYAYEVVTKIFNAYKQWFFTITFCEFTYFENRILKYIENYGDGYPVMLLNGCPDTNNTKVKPKINKHGQTAYVVTSNDLSIEESEFAIEAFIRTGVFQPRAAVIFVIKTPVQVDSYFFYTMKNHFELLWKRRVTNSVLVLWSEGLRIYAYNIFYKELKDITDVKFVNEIFARQFDDLFGHELRISVFRKIYTNNNTGAIDCSSRLVHTVVKTFNATCKPLSPRDGNTVGDLLENGTATGVTADLIDGYSDLELNSRILKTSYYGYIDTTYPLVQDELCFLIKKSKKQSTFTTTLKLISTEMLVLLMCNVVLFIAITLMVRKVEIQLWQLNDNRTTSETILDLFKCFIRQTVELEFSGKFF…
>PrapIR87a
MISIVFRYIILASTMYTVLNVNPLLMPVGEDESVQASQCVLKLSAKYFVEKKALSGSIVIVGINAQAFTKKFLLQTVHNGIKYSIMVKTPYYPHANASHFREKAKNYMMVLENQIDLKNYLKLLSKLPTWNPFAKTIVLYEKQKNEVSETLAKTFINELHALKLLRVIVLLYSALDDEIISYSWNPYSETNCGGKCESVYILDRCKDNLISQIEVQKEMFPLDLRGCPLLTYVVISEPYVMPPVRKLTSELWNDAYEFQKGGEINLVKIISQFTNMTLITRMSEKKENWGVIYSNGTATGAYGLLRNDSVDLVIGNIEVTRTIRNWFNPTVSYTQDEMTWCVPRARRAATWDNVVTIFQWSTWLATLLCLIIMSFLLHLMNYKENKGKVSKWPTNLIFK…
>PrapIR8a
MEIYFLLLFIFLFNLCCVASEASLRYIFILEKHDVDVPEQIATAIKTIEKAKPGLHVSDDIIFLDRENEEDAYNQLCSSLSKGVSSIIDLSWASWEIGSGLPIIRSSLDSQDLITAINSYLESRNATDAAILVKSENDVDRTLYTLLGKSNVRVWVNSGLTRDSARSLSKMRPDPSFYIIAGDRNFVTSTYKRAVKEKLVRRDYRWNLVLNDYEPFDPAVLVLPSVILQIDTNECCKLLGVSECTCPSNTQRKQLILTNLLQYISDAFIKLNIGLSKMTCDAHKNDTLDQIDIFQNGGNDSMFYWNEEDSSLNLRSPFILSTFKPNEGLQRAASWSSNEDFKIIPGFEFEPLRDFFRIGTYPAVPWTLPKLDPVTGDAMFTEEGQPMYEGYCVDLIEKI…
>PrapIR93a
MQLWIVILCLLGRVASEDFPSLITSNASIAVVLDQQFLKDQYQGITDELKDYIKELARVKLKHGGVIVHYYSWTAINLKKGFLAVFSVTSCEDTWSLFKRVQDEQMLLFALTEVDCPRLPSNAAITVTSSDPGEELPQIVLDLRTEKAFNWKSAILLHDNTLSRDMISRVVQSMTSQIDGKPSISVTLLKMRHETNEYLRRKEVYRVLSKLPVKYIGENFIVIVTTDTMTTMAEAARDLHMSHTLAQWLYIVSDTNRRNGNLSTLINELFEGENIAYIYNRTDDGTHCQNGNLCYCKELMDAFILALDAAVQEEFDVAAQVSDEEWEAIRPDRLQRRDMLLRHMQQHITAHSKCGNCTTWQALAADTWGATYRNTDMVSNKDVDNVTTVIDNFDLLQVA…
>PrapOR1
MLDEKMSKFYDYFIKLAPLQAIIVFIGEIYYLVQRNDTIDFYSLGEVLINSLLTFITFARVVYPNLKYYGVIFRRFIKEFHLGNFMQCGGNYKKVADRMNKISNYYTLGMVPIIWLGVILFNLSPLWTNVTSGAFENPRPKNITLRFSVYYEYPGFKPEENFILVTILNLYFSYGCTVVVCTLDLLLILMCFQIVGHQLVLQANLDGFPKPRKLSVLQLTGEVKVMVEKYSIEENTHIHCMLRENVLHHRYIVCFVDDISSFFGPMMGLVYFFDVTGFCLLFLECSQLNTESLARFGPLTIIAVSQLIEISIIFEIVGSMSEKLRDNVYNLPWQCMDMKNQMTVLIFLNRIQRTMHITCMEVMPVGVQSMASILKTCFSYFTILQSMNT*
>PrapOR11
MEIKNYPSKKYTDFSHTYKIITFMMLVGFQYPKPELHRVRAVALFSMLLSVTPVCIFIFIDIYKSILVKNFVTVIRHCTIVGPFLGVFCKIMIMHFKEKTAMQIINEMNRDYELYNTMSPSYQDIIDASIANSLKYSEKGWAITVLFVVLIFPVMAAVLNVYNFTFKSEPTKYMVHDLPKPYGEPEERFDTPYFEIMFAYMVYCASLYIINFIGYDGFFGLCINHACLKMQLYCQAFKEALASEDMYEKIVGVIKEQNRLFEYVNLIQDTFNVWLGIILIATMIQICNCMYHITEGYELDLRYIIFISGTIIHIYLPCRYSAKLKHMSVETATLFYISGWEHVNNIPIRKMVLFMVARAQIPLEITAFNKLIFDMDLFVSILQTSYSMYTLLRS*
>PrapOR12
MLSYVKNHFLRVKCRLQKNSIENLLWLVNLIPSVSGSSLSSNRKANVPFWVVSVGLLTYVYVAGNVMFQLKFAKSPGDYIKSNVNVLLLLLTYNNCYWWLRQSTLLKKVLKQVKENDRLAKESAGQFGIHEKLLSVVKKIIVLFYGSIWTDAVFIYLPNRVDISNNHYCMTPCVGMEPLSATPNRQICKTILFIQEVILVIIDLNYQTLQLLLISHTATMYRLLAEEMQQLDAQVLDENHYQEIKKKVPLLIVRHVLTLDIIKNLQSLYSFPMGVNFALNTVCIALFFYLPTEEWIDFCPFLIYCFFVFFLYCYLCQKLIDASEMFERSVYACGWEKFNIREMKIVYIIMLQAQKPIELLAADIIPINIYTFATTIQFLYKFITIVKF*
>PrapOR13
MVFKLSIFFIQTKNHLNGNRIENILWFVNIVPNLLGFSLERDEVFVPFWIGTALILIYVYGVGSIVYQAKFARVPSDFVKNYFNVSILIFVLTNCYWWIKQRPLLKTVLKQVTENDKLSRETDCLLKKHENLLSVVKKIVFIFNGCNMISAIFIYLPHRIDVSNNYYSMTPCVGLEPLTASPNREICLIILTLPECCIITIMLTFQSLILFLIAHTSTMYELLSAEMLLLDKQNFDQVHYKEVKEKLPKLINRHILTLDIIKNLQDLYGMPTGVNFGTNAVCIALFFYLSLQECINFSPIFINSFLVFFLYCYLCQKLIDSSQSFERSVYACGWEKFDVREKRMVYIILLQAQKPVKLLAANIIPVNIYTFATTLQLLYKFLTVVKF*
>PrapOR14
MPSYTKNKTSEFIAQLSRLQFMCGLTYIWVDNNQSRFFVYFNKIATVLLYCFILSELASLFTQTHLSEKQASDQILFAFSHPVLMSYSLSCIYYGEDIKKLLFKLSVDLKGRYNDLEIENEMIRKAKLYSVLYVITFSAALFFYAFDGVLQVIRTDGTFTTVIMAWPDVKEKGFLPDMVRVGAYLIWWIFMIRASAVYVLVITLTIVLSHQYKNLQSYFYNLEEVFLINDHSLDGKEKEYESGLKIGIALHAETMWCVKECQRICSWVFSGQITINLTVFCMLMLQMVNSERTLVNALATLSTSLALLVSTGFFMCNAGDVTVEASILPTAIFLSGWQHCRGKSSIRVRKLVTFAIAQSQKPVVMRSFNVIELSYRSYVSIVKSSYSVFSILY*
>PrapOR15
MERLPAEVSKPLFLSIDVLSRSNIQIWNDYSIWKKIHILYMMPCIIAFFIGNALYTINMFSRDVSLSEVAYQISIFLIMIQATIKGILLMPKKKNIAELIEKLGATWTKGNLNERQIRSKKFIFKRMDLCLKIYYWGSMLACWNIELAPGLVTIVKLAMGQDTNPLLPFGVAFPFDPRKDWFTYILVYVYEMYSAFRFTYVYIGIEILMVTLCALLSAEFSILRDDFRHIEPESEETDNSALKNLVRKHQQLLMYTQLLDAIFNKILFFDLLFVTGIMCLFGFGATVAGGVVELVNDFFSVIALLLPVFIFCYYSEQVKEECVGIAEAAYDNKWYQGSESYKRIIRFVITRAQEPCCLTSMGYAPITLNTFSRVVSTTWSYFSLIRTVFTED*
>PrapOR16
MSKLDQLPQNFVKTFYRHIHYVTFLGIDIFDDSKANYFKRQCQLVIIYSVLLSTVCGQFLYLFLSRRTNASFLDVINALPGTLMATQDIVKLCILTIKKNEVRKVILELSELWPVESNSKKMNTVRIWTRRLSLFERFFYYCGYVAITFFLLVPLLMTIYTSLTTSKIDYQFPLDTYFFSFLQSHWAYAAAYFYISIVGATVHICAYIAIDFILTSITFDVSGLLAALQVDLNDMNVDNEEQDYSLVKEIVKDHQKLLRVVDNVNLIFGPLLFAQVTFSSIIICCFGFLTIVGKDLIKSLLATFGVILAMFNFCWSGQLLSDASSGIAEAAYNCPWYNRSVKFRKYIQIIIIRAQKPCTLSALGFSDVTLTTLSKILSTSWSYLSLLNQMYEDIA*
>PrapOR17
MVFKRKISFPVTEKDYLKLICNFINRLGLADCWYEKEIRYSIFNKAFSISLNIFSVIFTVNILAANYRTDLTLKESNDVLIFSYGLPAICLKVIILYAKKDDIKVFFKKLLEAEVTQKPNTKAIRAAIVVYVVVCCGFLSATVQMLYGIKDYVVEGIPVRVEVLYYPKASDAGLLVNFIRFLAIVHFWYIICIMNSTDYLCLCTLVFIKYKFIRVRMFFESLGKKSKSGKEFEKEFLDGVKLLKHAFWCARNVQNTIGSIYSVQIVESITLLVVLLLKSVYAGSDMALLLVCLGSYISIVILTGVYMTYSANITYEALQVSTAIFHCGWEKVKIRPGIRKLVVVTLQQSQKPLYMTAFGVINLSYENFLVVLRLSYSFFVVMRDSKSTRT*
>PrapOR18
MDTLRKFNLNYCDLSTMLENIDFLLRISNVKINKNNDRPINIIIRLIWILSIICYYYAYVFSMFWFVLVQYPQTEDFITACVMFSLLVCSQPSFVTMFYIIMKRVQNLIHSCLQFNNLVKTGTIFSKNLYSHLKHIKTRASIVWLAITINAVFYGLLPLAMPGRHLPEDNQVIYGLEPMFESPNFEIAYVVMGICVYICALFLANVTALNLVILGYVEAQMITLSIELQNLWKNAESFCQTHASSYIKDDVMKNHIKNRFTNECLKDIVLFHIHNVSIIKEFEDVFRVTKAIELMCIIFSIVTELLGGIENTYLQMTCTFVLIFIESLAGQKLMDASCMFEKAVYDCNWENFDKSNMKIVAIILPSAQKTLNITAGGMTVLNFTCFLSVIKFSYSVYNT…
>PrapOR19
MSSQLPRDEVLSELNFIKYLTTKIFLYPFKGRSKLTMIGYALTIFLVLSTTLQLMITIVSAEWLVIINTAPNLGVCVISAIKYAKIQMHRERYNQIFLHFYDEMWDVVANSDIHRKTIRYYKKLAMIINRFLLYYSIPLIIVVDSFPYIVMRFEERFFGIKEYLYPIEVWYPFDKIKFYIAAYVWESCMTAVVVSLYAITNIIHSTYIIFTCMELRILGNCLEELISDEDVDNITKGVNIDEIYKRSLKRIKMIISRHDILAKQIAALDTILGDAMIINYSLGAVFICLTAFTSTVVSNFYKRVRYSFMCLSLLVECFNQCFMGQIISDSSKNLTNSIYSSNWPYASPETKTIMLMFIMRTQKPFELTAKGYTVMNMHTFSRICSTSFQLFNLLRTIYA…
>PrapOR2
MERLPEDVINPLRLSIEILGRFNIKIWNNDSMWKKIRIVYMMFLIIAFFISVGLYTIQIFTAEVPISEVAFQISTFLFLIQATCKAILILRNRTNIAELIEKIGDTWRIDNLNERQIRNKEFLFQRLNFCLKAYYTGCMITVWTNVFAPLIIHLGKLAMGQNINLILPYGCVIPFDPLKDWFRYMLAYVFEMYAILRFIYIYIGTDILMVTLCALLSVEFAILKDDLSYVKLDNSSIKNFVRKHQQLLEYIGLLDEIFNKILFLDLIFVTVVMCLCGFAVTMANNVVDCFKNVLCVLSLLVPVYIFCYFSEQLKQECADIAQAAYNNKWYNVSVSYKRIICFIIARAQKPCSLTSLGYVPITLNTFSKVVSTSWSYFSVIRRVYGDK*
>PrapOR20
MTNIFKKTISKYIHTVGPRNEIDDIFFPALVYQSIFGQQVLDPTWSWRKHAIHQLLNIVLFIYVLIGTFECLKTSDDIELQAEAYYTIILTIIFPVKMVLFIKSRFTFRDLYATIKNTLIDVIRRNPSADIKRVLQTANIIVFSLFCMVIVPVSIYELTTLWNYIAGTRILLSRSTMTLMPMSSPYYELAWFLHTIFMFEVSSTIILDMWFVALIYFLCAAYQGLVSVLKIERCTGSDEYPEKLNVVLREFYYTHLKLNKYLLSLIKMYEVSAYIPLCNAAMCICLNLLLMSKEINWRFAPHMLPMFAEIFAYNWFGEQIKTKMNEVKLALLDFEWTSLKPKDRKAYLAIIIFMTKEFGIKTISGTDLSLITMTAVLKITYQAFTVLQTMDA*
>PrapOR23
MEQSKTSEFVEKVTKLQYMFGLPYVWVDDKKPKYFQHFNKIYTFFAISFVISDYVSFITQNHLTEKQTTDRTLFTLSHTILILYCFVFEYYKEDIKQLYTVAVNLKTHYNDLAIEKKMIRKAKMYLVSFGSILCYALTSYAVDGTMQVLKANSTFTPVITAWPDVTEKGFWPDVFRVIAYFGLWMFMLKVYAVHVFVFSITVILSHQYTNLQSYFYSLADIFKKACSEEEKIKEYEKSLKLGLWMHAETFWCVEECQRINTWVFNGQTTFSLTIICLELLQMANSTSVMNALSNVSSGLAVLLSNGFFMCNAGDITIEAASLPSAIFASGWHHCSGSSSARIRKLITRALAQSQKPVVIRSFYVIEFSYETFVSLLKASYSLFSILY*
>PrapOR24
MFKKLQQFGIRFCDFQTMISNVSILLRLLLINIDKRNTKRIPFISFVVTILISVGYFYTYLISAVWYVFWRCQETGDKISALIVFSLGVASEISAFKLLFMYIYSDTIRNIVEGYLNLDAKTRTETRLAKSLESKLKIIKTRAIMYWCIIISNGVLYAFKPLLLPGRHLMEDNFDLFGLDPILESPNYEIAFTSCVLGIFYTCYLASSISAFLIVIAGYTESQLIVLSEEIKNLWDDAKEQINGNNDSTSYTEDDIKRLNNIINNRLKNIIITHITNIDLMNDVKRVFSGSILIEFLLVITSLIAELLGGLENTYLEMPYALAQLTMDCITGQKLIDACDVFNRAIYDSKWENFDNKNAKMVLLMLQNSQKPLYLSAGGMTNLSFVCLMSILRMIYSGY…
>PrapOR25
MNRGVYKRVLRHLLSYSINKCDLNTMVGNVNFFLRAVTVNIDKRNTKPISVLFYFLTIIGLICYYYVYVVSVVWHMFVYYPATGDFIGTVIMFSIGAFTETCPIKLLFMIIHRKLIANVVERYLQCDAQIDPGSRLYHNIQSHLRTVKKRGTTIWLTLVIIAEIHCFTPFFLPGRHFPDDNYILYGLEPMVESPNYEIATVIITITISSATYYVANCTAFMVMLLGYTEAQILSLSEELLNVWNDAEKETENIDIDSRSRARNNFISKRLTFIIKLHNENITLLKQIEDVLRVSMALEFLFLIAGLIAAMLGGIRHTYLEIPFAFSQIFMNCYLGQKIINASETFESAVYDCKWELFDKTNMRTVLLVLQNSQKTLNLSAGGVAILSFQCLMSVIKSSY…
>PrapOR26
MEKFRQFNLNYCDLNTMLENLDFLLRISNVKINKNNDQPIPKIFIIIWFVGIICYYYAYAVSLVWFVVVKYPATGDFNTPCILFSILACSHLSFVTMFHIMIYKEKLQNLIQSCLDFNKIVKPGTVFSKNLHIQLRYIKKRASIVWVAMFMNAVFYALLPFVIPGRHLPEDKQVIYGLDPIFESPNYEIAFVILSFGIYICGLFFANVTALTLVILGYVEAQLLALTTELQNLWQHAEIFYETHTLANHDHSTKNKIKNIFINECLKEIALFHILNINIIRKFEDIFRGTKAVALLSTILAIISELLGGIETTYLQITYTLVVIFTETYAGQKLIDASIIFERGVYSCNWENFDSNNMKIIAIILPSAQKTLNITAGGVTVLDYCCFLSVIKFSYSVYN…
>PrapOR27
MEAVRRFRLDFCDLPTMIENVDVLLRIVNVKIVKANDRPINIIILFMWVVSLTSYYYAYVVSTMWFVFIRCRETGDLIAASIIFSLAACSQPSFITMFHMIVYKKKVQGLIENVQGFNYFVKPDTTYSKNIHTHLRYIKKRAMVVWITMVVDGMFYILIPIVMPGRHLPEDLQIIYGLEPMFESPNFEIAAIITALGVYICVFSLANVTAMNIVILGYIEAQMISLSKEIKNVWNSAEDFYRKHAISYKSSGSKTIIKNIYVNNKLKEIIYFHVKCIEALKYYENVFNVTKAIEFLLIVLGIISELLGGVESTYLEITFTVVLISIECISGQKLKDASTMFERAVYNCKWENFDINNRKTILFMLPSAQRTLKITAGGTTPLDFSCMLSVFRFSYSTYN…
>PrapOR28
MNVKRKFLSFWESFRKYGLGHCELEEMLTNVSLLLRTVTLNIDIRNKKPIPLITYVFTILGFLCYYYIYFFSMIWCAFVRYRHSGYFLGSVIVFSVGAYTESCGIRLLFMVINSKVLREVVERYRVCSTQVEPGSRLAKNILKHLKTVKKRATLIWLGLVVNAYSYLILPFFLPGKQFAENRLILYGLEPIRESPNYEIAQVMYCFAIPTATNSLANCTALMIILFGYTEAQLLGLSEELLCLWDDAAHISQFANETKTEVMNNFVRQRLKYIIKLHNENIDLLKQLEQVLRVSMALEFLVLMAGLIAALLGGVENTYMEIPFAFAQLFMNCYLGQKIIDASETFETAVYGCRWENFDTGNMKTVLIVFQNSQKTLKLSAGGVAILSFQCLMSVIKSSY…
>PrapOR29
MSDLDLIFYKQFKITTMAMRFNRSWPYGKRSILCKIQVFVSYFVSIVTLFFLLYSMIFYDFPDEEYGEVVKNGIIVIVSTSVIIKFFILTHHRESLVNLIKIVKNDYEEAKQFNINDKTIILDYAQKGKDICKIWIVIAAGASMMFPIKAIVLMAYYTYKEEFKLVPIFDMHYPDVINAHKYEPKIYILLFLLIFPFDCFAGTMYVAFDPLVPIFMLHMCGQLQLLSQRITRLFSQNEADIKDNLRIINIKLQSIYSFLETVQNIFTVQYEYNLKTTTFLIPFAFFQIIQSLKNREFNLEFVFFFVGAILHFYIPCYYSDMLMEKSGKMREAIYSSGWEHNANIKSRKMILFMLTRTTMPLVIRTIFYPICLDTFAKMTRHSYTIYNLMNAAWG*
>PrapOR3
MAAQYYMQPPREQIFYKVLIVLANLTGLGSKSWWGYTVPNIYYRLNNLIINTFAPSLLISQLIYLYVNFNDLSFDTLGIIFSIIPVTCLANVNVYSAKLSYYKKLMKDFICKIHLNNGKTESAFTKKKILIIERLSRWTAYYLIFFFSMNWVTWIWIPVFNNINNKEAILNRTMKLQTCLYLWFPFDYSYNYQNWVIVHVINIYVAGMGVTVMMIFHTLNYLFMYHLIGHIQILKHKIRSGFHKNITNEEVKDVLIEVLKYHAFILRVFKDVQSAFGVNVAANYLHNLVGDSLIMYQIMYASKENILLYVVMVTVYMGGLILMSFVLEEIRRQTEDLADVVYGMRWETMSIPNKKIFLLFLQRVQPAMEFTALGGLKAGVKPMISIIKTTFSYYVMLET…
>PrapOR30
MNTREELRFEKIFKTMLKALWLNKSHPNIPRDMKWFFHFFITYGTFALGMSFAAYSTFFHDMKDRNISQACYHGVLIVIFTVVSLYQFVMGWHRFRFQDLISQIKEDYDQAKQCAIEDYNVVLAYAKRGKMILHIWIALLIFCVTIHQLSAILPMVHIAITTGKFQCVHLYNLTYPGDLEHWKHKTSVCLTLFSLFTYVYIYAVIMYIAVAAFGPILMLHGCGQLELVRRRIANTYSKRNKGFEVKNLKLAAKHLFVTYNFLKKTNESLQMFHEIIFKAVIVILPFLFYQLKEGNTNREMNIEMIGFVLGAALLCGLPCYFGDLLLEKTNDIKMALYSCGWEHHIEKEPRTLILLLMIRVSRPVGLSTLFLDICLEQLTDIIRQAYALFNLFIAVLD*
>PrapOR32
MDSRFKSFNDTFPRCAFALAFALIYPNSHNLKKRLYYFIVVIFINSLILYWFLIYLFRCLFTLDLINFANNITIGVLATLFFFKTPYCLYKTNIFAKVLDKISYDMLKGNDMNEEYQEICEHYIKIGKLGETCWILIPILLSSQFPLYASFCMIYETFTTGEGKRYMVHEMRLKHIEDKQDETPYFELVFAYNLIQCVVLSVNFVGFDGSFCIATTHLRLKLKLVSHKINQAFRDSKNRDDLKARVIEAIVDHQDALDFYKDIQEVYGGWLFVVFLLTSLLISFNLYQIYLSRRVDPKYTIFAISGVIHMLAPCYFACQLIKSSEELSWDIYSAAWEGWADPVVTKLLIFMIAKSQQILILTGKGMVQFDMQLFISVLQMSYSFFTLITS*
>PrapOR33
MMYPNPRKDSKRTIGFGVIGVFCAPQLFIMLFDIKERIQIKDIDNLFRQLIITVLLVYVYIKIFLTLNQNMKFRAILDKVSTDYECYNHLPEDYHVIVTETIEKCKKLEIIWILMVICTGLAFILLASVLTLLSQFTEEPRKYMIHESIIPVIEELKYDTPYFEILTVYGIYIVTIVIIAYTGFDGLFYITVLHASLKIKIFSQKISHLMDDADIPTINAKIGIIVKEQCDVYRFIKQIQSFYQFWLASVFTLVIIQISMGLSQTKAGSENTIIYFIFATVASINIFIPCYVASDVTSSAAEVCNFLYDCKWESVPDTSVRRSIVIMMARSQVPVKFTACGMLTISLEIFVSIMQTAYSVYTLMIS*
>PrapOR34
MLKLHLFIDKEDFFYFNEKYLYFVGLWPNRHSKVYKIYEIGLHILAIIYVIITGIGTFQIKHDTVVLMASLDKTLVAYNFGLKIFFFVIKRSQLQKLIDEIKYSGDKVSDERVKFMAAHIIVITILSTIIVSIFCLLAQYHGEMTVELWVPFDPMKSKMNLMLANQIAAMTFVVPHMYRAFAVQGIVCTIIMYLCDQLDELQERIRNLVYSTDNESAMRVEFTQIIKKHVRLMRYSNTFTNIFKEFFLIQNLAVTIELCLNALMITVVGREQKTLLANFIAFLLVALLNAYIFCYLGDQLIEKSEGIALAAYESAWTSWPSDLQRDLLTVIRAAQKPLKLSAGGMATMCIQTYSQALYNAYSIFAVLNDVVE*
>PrapOR35
MSENQALKEIYNTLKLCDFCTRKIGLTFKATSNNLFRKLWTNLWFFISGLILFLMVAGEINYVVNKLVTSSSVVEFVSGLHIAGYDTMSFGKLLTLWYKKYTFKHLLIELADIWPMSERDKEAFEIKQKKLSRLRIAQFWYAFWNILGLWLYNLTPIVVYLYQKIQGAPAYLDYIWHLSYPFDKTKPVYHEIVFVFEMYGGVVSVWSMLGSDILFTTMSSHISMLLELLQLKIRTLSSIETTNMNNSYEDIVSVVKIHQKLIKYGNDLEDAFSMVNLINVLLSSVNICCVVFNILLEPWMAMSNKFFLGAALTQVGILCWYADDIYTASTGVAEAVYESTWYHSDTRSRGALLIMMQRSQKPLYFTAMKFSSITMKTYSSILATSYSYFALLYTIYRSG*
>PrapOR36
MLKVKRFYNKENFDFSAGYVDPFEFHKTCYMFLKAFQVWDGAIPKWTYLLKALIVFCGVSAITILKFGFYHGLDTRDLPYMTEAGTYLLIMIYKLLIMSCTVRNLPDYHNLLRIIREDFRYVCDKGKIYRERFFENQLKIWKVCQISIVFLACIALGMMIFSIASLIWYLMTHDSKTGALPLPFPIWVPRVDVGKSPLYEVFLIYSNICVVTYAINFIFMMQIQILWIGEIATKADLVIWSIEDLMNGIRPALNKQEELYFSTLLKQRMQEIVKIHKSMLELMTSYARVYTKLLMFEQKVCAPVVCLSAYGATEILEKSGEINGILIILCIATIISVFIPSYLCNFLSIKVSSICYACWNIPFWNATRVIRPYIVLIMQRSLRPLPIKASGFEEVSIET…
>PrapOR37
MDETFQVFDRILSFAGISIFAKPNWNSKGWLIIQTFIFLLGFLTFIFTSVFVMSNLSDLLVCIQGACVWTTGVIMFISFGICLIFKKDFQAFVEEMAFCDRALDIPLVRSVISLPTTTGKLHELKNLVLTSQLRVFKVTKILLKTYVASVWLCATLYLCGPIYMMTVREDENLRLLAFDMWFPWSLDDFNVYIASFIFHAYAGYLCCIAYPGLQAMIILLVCQVIRQLQIITFIVTYLDDLVLEVIGTRNERWQVACTSVLTQCIQHYVRTKRFANRLNVICQPFYLALILVATMLVCVCSVKIAVSPKLALETLKYYIHEFCFILVVFMFCTLGQQVENQCEKLELAVTEKWYIFNRKHKIHVLVFNMALSQRMPIFVFGSITLSLPTFTWFIKTGMS…
>PrapOR38
MPSNIIGIPGFEEIFNQIKINFWFIGIPFEENVKLRFYIMWSWLFVMIIQEILYFISKFSNENFLDLTQLTPCTCIGILSIIKIILIARKRLYIFKLSSSLRKLYEDIIRDDKKVSLVKANFVFLKYLTKYFFILNAILISVYNFASIFLILYFYLKKNKVQFILPYAILVPFRIDTLGKWFIIYIHSTITGFICVLYFTTVDALYFIMTTHMCSHFTVLSQEIRDLKANTTHLLKDIVKKHQYILKLSQDLEEIFSGPNLFNVLIGSIEICALGFNLTMGKWTQIPGVVLFLMSVLLQILMISVYGEHLIMESRKISDSAFESEWYAMDAKSKKIIILIMLRANKAQTLTAYKFSVISYESFTKIISTSWSYFTILKSVYKSPGQTPNEN*
>PrapOR39
MIHSLGKDSFDKSLILIKISLWFSGVNVFRNNEKILPEQISYLFHVNFFWLYTAVSGELYCIYGFIREGKSFEEISLIAPFPLICGLGTVKAASIYINKHAAVTVLKKLRELHPDILTINEKDSENHKVQSDIQKRIRIIHSTKQVLFKFVICMCLGVIFVIILFCVVPLTSMAIDYNKFGCTDLKLPYYVRYFYDPYSMPCWPGEYIHQVGCSVIVCVNIFGADALLYAFCLYLRMHFEILSIDFERLTDSKEDLRELVLRHQELIESVNEVQKIYSTSMLFNIIISSFTICFCGFNITVIKDVGTSFAFLNFLLMSLYQIFMLCFFGDIISVSSTRIGDAIYKSKWYEAKPAFKRSLFIIIMRSRKPCVLSAAKFATLNLTAFTKVSF*
>PrapOR4
MFIDIPENDRKYKSFRETYKYTTFSMITSFVYPNSKFIKHRLFGFGLITLTSLPMVIFISIDIVRYAMDGNIVEFIQQTNLLGPFLAILFKMLIQCYCNQHALAIINEINRDYALYNDMSAPYQAIADESIKSNITYTDRGWFITVALVVLVFPAMALARNMYYEFQGVNRKFMVHEVRIPFVVDDDRYKSPMYEFMFLYMVYFCFLYLIGFSGYDSFYGLSTNHACLKMKMYCKMFEEALKADVNEVQTRIAEVIKEQNRLYRFVDIIQNTFSIWLGLILLATMIQLCNIMYILLDGGGFDLKYLIFCIGSTLHIFLPCLYSAKLKDMSLETATLIYCGGWEQIHRSEIRRMVQFIIARSQVHVEIVAFNVKVFDMELFVSILQASYSVYTLLRS*
>PrapOR40
MAELRNSEFENSFKLTKISLFLSGINLSMKRSFPLNFLFILNLLWLFTDVSGEFYWVFEGVRAGKSFEELSVILPCTVICFLAAFRCVPLYLNNKLLAKIFNKLCEIHPKAEDKENNTEKEEKEITGRAVKLFHNIITFMVIANSSVVIAFCLLPLILMAIDYQKTGEVDLKLPFLVKYFFDPFTITKWPLVYLHHIWSTFIVVLYLFGADTFFHACCIYLRMHFELLCSRFEKVVTNSKKGTEERLRACILRHQELIALVELMEQLYSKSFLFNIMLSSILICLSGFNIVFSKQFGQIFAYVNFLVMCLYQIFMICYFGDMVVISSSQVGEAIFNSKWYDAEVKIKKSLYIVLLRSQKPCTLTAAKFATMNLRAFTTILSRSWSYFALLRTMYN*
>PrapOR41
METNRALKELDKIFLCLGLSYDRSSKKDRIKRRCIYIFNIIWHNSDVFGALVWFYVALQNGASFIELTYIAPCLAFSFLANFRIYSVISNEEKVYELITTLRELEHRAMDDTDITEIFREDTKFLHKVLKMSKVLNFTLIFTFFITPLILTLVKYLNTGKWDLLLPFLIVYPFDSHDIRYWPFVYLHQLWSEVIAILEICSTDNLFYICCMFIRIQFRILQTKFSKINIHRSLNADYFKLEFTELVIWHQRLIRSLKILDQIYSKSTLLYFLTSSIIICLTGFNVMSMGDKAFTSMFLTFLLTSLLQIFFICFFGDLVMQSSSGVSYAMYSSKWYKADVKLRKLCNIVQTRAQIASKLTAYGFADVNLRAFMSILSTAWSYFALLKTLYNPS*
>PrapOR43
MKILPRLSRRKLSILSPYLPYGVLESWDDLNPRLYHAIHIYWLKFYGMWYNKYSPKCLYFWLQIIYTVIVLWLVCLLPAIGEIEYLLKRQDNVGEIAEGLYLFLSEMYTYFKVAVFWLNKRKILRLLKYLHCKEFKPDEQEHREILRDSIKTSRFVMTSYSTMCVGAVSVAMIMPLAENFEILPTNVEYTYINVNKAPVYPILYLHHVYYKPATCIIDGAMDTMLAAFIVCAIGQIKILSFNLRNFGEIAMRRRKKAIAERQFVGSHDFYIKVVVKKCILRYNAIIRYVSMLESAFSLASALQFMLSVMVLCLVGVRFLSIENPRCHPIQIVWMAIYLACMLIEVFILCWFGNELILKSLELSMAAYEGPWLKLDPKTTMLIIVFMERCKRPLRVTAGK…
>PrapOR44
MGDIIHCFQINEKFWNILGIHPKPNNKLHLIYSAVFVIFFIIIYDFLFSINFYFMPNQLDLFIEELILYFTTIGVVSKVLTFVCMRAKITQLLSILKSDLFQPENEEEYHILCEANKFNITYWRIVAVVSITSNITHVTSPLLLHLIFGAPLSPPVCSYSFLPENTTHTLIYPIYFYQSIGIHFHMLNNVNIDTFILGLMILVMAQLDILAVKLKNVTNMPSAINHDRSQCTDAEGNLILKLNSSLERYNDVAKFCELTEEVFSVSLFVQFSIASAVICVCLFRFTLPSTWQYYIFLGTYIFIMIIQILIPSWFGTRIMDKSCFLSHAIYSSDWTHQSRAYKRNMRIFVERASRPLSITGLRMFPMSLSTFTSIMNSAYSFFTLLRNME*
>PrapOR45a
MAAISESFNINFICLRFFGVIWPGKISSIYYKFFSGFYIFTTLIVYYIILILNLLYTPRNIELLIREILFFFAETLSVSKALMIFLKQKPLVRAFNILDCEHFKGEGDRSRKIVSQYIAKYKTYWKFIAILSHMAYLVKMSVHIGNFFYGYVELPFYNYYFLQEETIDRYFVFLWLYQAYGIYGHMLYNMNVNTLIAGLFLIVVAQVEMLDYELRSLECDNSSEQVQVIKLNKCLRHYEILLQYSNEVQDITSVTMFVQFTVASGSICAILCSLLLPKTFGELISLLAFMSSYAFVVTLEIFTPSYLGTQLRYKSQDLVHAAYSSKWIARTESFKRSLKIFMLRANTPIVFSGCGLFPLTLDTFTSIMKSAYSFFTIVRNFQNHDK*
>PrapOR45b
MANISDTFNINFICLKVFGVPWPGKTSSIYYKCYSAIYILVSLILYYLLIILNLFYTPRNIELLVREVLFCFSETVAAAKVVLIFLKRKTIVRAFRILNCTFFKGDDESQELVSKYIVKYKTYWKLNAIMSNSAFFAKIFVPIMSYIVYGKLELPIYNYYFLEKKTISRHFTFLWFYQAWGIYGHMMYNINIDSFIAGLILIIIAQIRIIDHDLRKLKSNSVDEEQLAKLNKCLRHYEMVLQFSKEVQSIISVTMFIQFSVASGSICAILCSLLFPTTFGSLMSMLLYMSPYAFVMILQIFVPAYLGTQLRYRSQDLVHAAYSSEWIARSESFKRSLKLFMLRANTPIVFSGCGLFPLTLVTFTSIMKTAYSFFTVVRNVQRTEK*
>PrapOR46
MEIKLSYKSVEAHFLNLRLAGYYQIDLRSGTMYRLLHRFYMGFVLSLMLFYTMQQALKVYEVRENIGHVMGTMFLFLTHTDAIYKQILLWALQNDVEDLLDTMKGPLYNQGKKEHNYYLLKTIRVTKLLLYSNNALAVATCFLWFVYPIYLHVKGIQLDFTIWLPFDENQDPYFYITAVYSWITTTWLAFGNTTMDVMVSTLLAQAKTQLHILGYNLSIIINECKEEHGSTSEHFSTLLHQRFKNILRHHEEIVRFTKNIENIFGNVLAYQFLIGGWIICTSVYRLIDIEIVSIEGFSMVTYIICMLFEIFIYCYFGSEVTQASIEVRDDAYSMNWFDIPVKNRRELIIFMERIKRPIRIMAGRIVPLSNDTFVSIVKSSYSFYALLRSTNE*
>PrapOR47
MSSTKRIERVKNYVHFMLLPLKIVGCWEWYPHPVNKQIYVNNIYICMILFILTNLPLSLVVHLYTEWTDVMSSLDKMADGMPLFVSVAIVAYFAIYKKELYELTEFMNFNFKWHSANGLTNMTMEGSYKSARNFAYFYTACTFFSVAMYVVLPVIGYLLFSHPLHPWIYKDVDGGLFIFFVFLRQCVAQGFVALAMGQLGVFFACNAILLCGQLDLLCCSLRNIRYTALLQNNVAHEALKLQDYSILEDEQHSYTYNISTETESNYHYDVEILQHGKNRRFDIYSTHYDDGTSRAILECARVCQVVKEYQGKFEAFVSPLLALRVVQVTLYLCTLLYAATLKFDMVTVEYLGAVALDIYVYCYFGNQIILQADRVSTAAYQSAWISMGVAPRRLVLNML…
>PrapOR48
MKFFIDHTYYGLKFSLNVLQLCGFYAPDTLTGFGRTLYAVYFIMFYVLIIGIYIVIQAGEVVQVWGDIPLMTAAIFLLFTNFSLSFKLFNVMLKRETIRTMVNDLEQELICEKRESGKKIIARFNRQARLQLLTYIALSAGTVLGWAGSAEKNQLPLRAWYPYDTTQSPAYDLTYIHQCVAVGLAATVNISVDTVVTSLVALCCCRLQLLSLSLQTLFHDLPLQTTGLLHPSVELVAWDRLRECIHQHQTTLNATALLQRCFSLPVLAQFTVSVLIICATAYQLAFETANLIRMASMMFYLIVMMYQVFIYCYQGNEIQVESEAVCDAAYGSEWVVCTPRMRRALVLLMTRTRCPVILSAGGLANLSLKTFMGIIKASYTFFTVLQGAGTGTK*
>PrapOR49
MSFFINNTNYSLRVSLTWLRIMGLWAPDTLGWKRMLYTWHTGFVYMLVVGTFIIIQATDLFIIWGDIQLMTASAFVLLTNLTHSLKILNMVVRGDRIKSIVNKNYTVLKMQVSVEAKKAVKTCDREVNIRSMLFAFMTATTISLWALAAATENQNKQLPMRAWYPFNASQSPMYEIAYLHQSLSLMLSASMNASKDIVVTALIAQCRCRFRLISIALKGLCRDLHIVNNRLSKKQEEIVTVRLGNCIAEHQDTLETVNELERCFTQPTFAQFTVSLAIICVTAFQLVFQTGNMLRMLSMTFYLLNMVDQVYLYCREGNELTIESENVSRSAYEWPWYTCSVRVRRSLLILMTRCCRTAKLTAGGFTSLSLTTFVSICKASYSFFTVLKQVDEDT*
>PrapOR5
MDGTITFFDRVLSYAGIKIFSKANRNSKTWRCYMMLNIMISISTILFTTNYFIQHFWNFSKSMQAACLSLTFSFLILNLCNFFYFKKELEEYIDEMVFNDPGLDMQLIKQVLEIKVFGKKYDLKLFIINSEKKWIRVSGRMLKIYLAMVCFCPVLYYYGAFYKEINSKDKSLRVLPFEMEFPWSVQHIGVYISTCVYQAHAAYLCCIAYPCFLSLLIIIILQISRQLNILAYILKNMGDIVEIRERNVIWHEKCYEILKQCIMHYLRIKRFTNKLNSTCKVYFLITILLAMTLEAICFVELSLSHELNFDTMTYAVHLTIVIIGIFILCNLGQVMDNACKELEEAAIEKWYDHDMKYKKSMLIFYTAVTQGMPIYIYGSVTLSLETFTWFIKTGMSLYT…
>PrapOR50
MAIVIANTNFSLRFSLTYLKVFGLWPAVGIAGWKKILFYTYFLFMFMLVLGTYIAIQLVDLWQNWGNLSLMTSIAFVLCTNLVHCVKIINLLLRRRRIEHIINRNDYVLKNTTGQQKIDIIRSCNQGTTLHLMTFLTLTTVTLIGFAVGPALESQKLQLPLQAWYPYDWSKSPAYELTYLHQICAIYAAACLNVSKDMVVVSLLAQCRCRLRLVGYDLKSLCLNMSSGTMQRMSQARDLMVQARLNECIREHQDILDSLNELQHCFSEPIFAQFTVSLFIICVTAFQLTKQIGNFIRMASMATYLLNMMEQVFIYCYEGNQLTVESENVSRSAYEWPWYTCSVRVRRSTLILMTRCRRSAMLTAGGFTSLSLDSFMRILKASYTFFTVLRQVSE*
>PrapOR51
MTKLTNLFINRAQHVMKYLGVWVPNESDTIYQKSYKIFMLFLQYTFLLFQMIFVVQTWGDLEAVADAVYLLFTQASLCCKIAVFHINIERVRELCQQMNNEVFQPTNLEHERILQIRAESIKRLLLCFIVAAEMICLAWGVAALPFFDNGSRKFPFVMWMPVNSDSSPQYEIGFLFQELTISTSAMMYYGVDSVAFSMVIFACAQMEIIMEKILSIESRNDAVLENNASLTDHYYNGNRILIECVKHYQAIITFKELVEKTFHIYMFFQLTGTVGIIVMSAFRILVLENESFQFISTVTYVIVMVSQIYLCCWCGHELTATNEKLHRILYMSLWYEQDVKFQRALCFMMARIQRPLVLRAGHYISLSRQTFVAILRMSYSYIAVLNQTM*
>PrapOR52
MINNTDMFLGRPRFILHYLGIWLPPEEYKTLRNIYKFLVMLTQFSFIFLEFIYIAVVWGNIDEVSEASYLLFTQASVCYKTTVFMMNKNNLKKLISFMEVGIFAPQTVEHKKILSAQARKIRNLSGVFLTSAITTCTLWAVMPLFDTAETRFFPFKIWMPINTEKSPHYEIGYLYQVISIYISALLFCAVDSSTLSMIMFGCAELEIIIDKIQKIRDIPISRINKSDCRKRLTENNKMFMECVRHHQCVVKFIELVEDTYHANIFFQLSGSVGIICIIGLRIVITEPSSVQFYSMLNYMLTILSQLFLYCWCGNELTSMLLQSQNLREYLYLCPWYEQNIKFRRSLIIAMERMKRPIIFKAGRYIPLSRPTFVSILRSSYSYFAVLNQTKN*
>PrapOR53
MLYFIVLFQSNLVELFRSSASECVAIHTRVLRLAGFLRGDGPAHTLYRRGVLAITTLYLVQECVYAYKVRSDLDKLSRVMFLLLCHVTSLAKQLVFHFDSDAIKRLIDALDNPVFKNEGDAAMQLVKKCTRRAWRVEAAYSGCAVLTCTLWLLFPIRHHTQGLHVEFPFASPENTDASPMFAAVLLYSYYVTTLVGIANTTVDAFIATIIYQCQTQFRILRMELEKLPDTARTISNARKVDYETALSQQLAQRMQHYRHITWMADSVQKIFGKAILVQFGIGGWILCMAAYKLVSLSVLSIEFASMALFISCILTELFLYCYYGTELSVESSHLAGSVYAMQWVGAPAQFKRSLLIVMECARRPLRPTASTLVPLSLDTFLKILKSSYTFYAVLRQTK*
>PrapOR54
MFFEYLYRVIYLAGISSRETENKKYYIYSSAVKAALVLIFMSELWQFFSTQWTLDTITDSLNILMIQLGTVCKYRNKLANENVFRRLASSMNSPNFDVSTDERKKLLEVWQRRSVGYLKLLLALGTCTVIAWHIYPLVDDLDYNLMVPIRLPITYQTQLRYPATYFLVIIVFSYMSYFVMVNDLIIQAHVMHLLCQYSILGDCFRHVLRDCKLEFHDLNETQLYSNKNFQQKYKKRLEGLIRQHKYILNNTSDLRDILSAPMLAQLAVSTTLICSIGYQLVASSINVNITKWLMSFLYLGYNMFGLYILCRWCEEVKIQSKAIGDAVYFSGWEEGVTQVPGVRSSILLILARCNKPLVLSAGGMYDLSLEVYATMVKTSYSALTMLLRFRQN*
>PrapOR55
MKSFGNLWRKLTHTKALQLSSGRFETLYFESVYRVTYLAGLSFVHEKLLYSIYSTTVKLLLFLLCVCEFWHFLTAQWTIDTIIDSVNITIIQLSAFYKYTKKLANESVFRRLASSMNSPHFDLSTEKRKEIFEMWQTRNEGHIKLILGLGTCTIIAWYIYPLVDDLDYNLSASIRLPFTYQTPNLYPITYIVVIIVFSYISYFVMVNDLIIQAHLMFLLCQYTILSDCFRHILRDCKEDFKGMDEIQLYSNLKFRQKYKNRLGSLTQQHKFILNNTSDLRDILSAPMLAQLAVSTTLICSIGYQLVSTSMNVNITKWLMSLLYLGYNMFGLFILCRWCEEVKIQSIAVGEAVYFSGWERGITKVPGVRSSILLILARCNKPLVLSAGGMYDLSLEAYAN…
>PrapOR56
MDGPRRYFAMHFLLLRFLGLGYWHHPDEGDTRNFPGVYLYYAILTELVWVAGFVGLETVDPFVGEKDLDRFMFSLSFVITHNLTLIKLYIFFFKNKDIQEIVHILEIDLQMFYQNNDRNRRTVKVTRILTGAFLFFGWITIGNSNVYGIIQDIRWKADFPMYNDTERPPRTLPQPIYIPWTYQTDKAYISTFLLETIGLLWTGHIVMTIDTFIGSVILHMSNQFAILQEALITVYDRTRMKVAKDASNTADMDLRISKEEDFEKALNIALMDCIRQHQLLISCVEKFAKTYSYGFMTQLLSSMAAICVVMVQVSQDASSFKSIRLVTSLAFFAAMIIQLAIQCFTANELTYQASLVSESVMQCKWERMSPRLRPLLIMIMMRTQRPLRLTAAGFANMDN…
>PrapOR57
MSSTTKFLLQTFCKYVYISGSGNFHYDQKIYKETFFYKMYSVVSYSIYITMILLENCAAIFGKFPEVEKNSAVMFAAIHNIVLAKMFLLLYHKNSIRKLNYEMGTVMEYIEKEYVMREQYRKVKFGILLYVASVYLSLVAYGVESLRKAITEGVPFYTVVTVYPSFNDISMLATLVRVFFYITWLYMMLPMMAADCMPIIHLITMAYKFKTLCHRFEAISEAFKREVKISKTHAISMLKVKFLEGIVIHQKLLILTEEIQRVFGIIMSLQVCESSAVAVLLLLRLALSPHQDLTNAFMTYTFVCSLFILLALNLWNAGELTYQASLLSNAMFYCDWYKCDVNKDSKNIRKLVLIGCAQAQKPLILKAFGVQDLSYATFVSVARMTYSIFAVFYQRRH*
>PrapOR58
MKNYYILKTFCKRIFLVGTGNFWYENAEIGDDSSIYYRTLSSILFFAYCFMTLLEIMAAFMGDFPEDERRDSITLSVSHSILLIKIFSIIYNKKIIKQHMSDMVCVCERYEKESSLRERYRFLKMNVLTYFIIVYSSAAFFVLEGLKKAYSGSHFVTVITYYPSYNNDSGLATFIRIFNTVILYVMLLSMIIVDGFAISNLIILKYKFITLRHYFEDLREDVEKICEMGNYKMAGERLTNGVIEGITMHKELLRLSKVIDKVFGTAMAFQLCQSSVAAVSLMLLFALSENLTLFASLRIISFVAALFLLLGLFLCNAGEITYQASLLPDAIFYCGWHLCPARYKGQNLGKIVSIACTLAQRPLVIKAFKMFELTYVTFLQVIRGTYSVFALIYAQNQ*
>PrapOR59
MIAKVKENSKKGNHELSEDYIRYLTQNRRTTMEVSIKNWVQKTGLWFGPLGDSTNWFAKICIICFFFTNAAQFVSLIISRNDPEHLFRCFSVLSFCGMGFIKLTSLQLRRQSWRYLYSKTYILENEQLNNDDTTVNYESDDEENRTFPQHILLYTKQFVTTSSWLAKMYSFTAVVYILSPFIEYAIYSANGDVTFRVHVLPIWSPLDNVSIIGYVFTLIVEIIASIYCVAIHITFDTFATGTMIIICGQFTSLREYSKYVCGSGKQCDLNLKRDARAHYRIKKCHFIHVTLLSMVNKLNELIRDIIGIYFFVATLTLCSVAVQLQSTELSATQLISLLQYMCATLTQLLLYCHYGHAVQTESAVFIGDGPFTSSWWSVSGKVRREIAILCTGMSHSCRL…
>PrapOR6
MLRYLLQKLENLERPLLGPNFKALTFWGLLLPDNIYKKIFYLTMHLLVTVFTATEYIDIWFVKSDINLLLNNVKITFLATVSVAKITTFLAWQKHWKSIIEYVTKSDLAQRNSDSKKGLINNYTKYCRKITYLYWSLMYTTVVIVMGQPLVKYISSASYRENVKNGTESYIEVVSSWVPFNKNTIYGHIAASIFQSYGAIYGGGWITSFDTNAIVIMVFFKAELEMLRIDCADIFGKREQVNDKEAKERLKNCHQRHIDLMANARLFNSCLSPIMLLYMFVCSVMLCATAYQISAESNPMQQFLIAEYLLFGIAQLFMFCWHSNDVYYASKNLMFGPYESKWWSRPKSEQKDISMLVDQLNKTIVFTAGPFNNLTVATFINILKGAYSYYTLLN*
>PrapOR60
MLYRFLDRLEDPERPFLGPIIKFLSLWGVWLPKDPKMLIISILLQIFETAFITTEFIDVFFVKANLDLLLTNLKFSMQGAVNICKAWSFIAWQKDWRAVCDYVTRADIANRSSLDPKKKENIESFTKYCRIVTYTYATFTFATAFVIIFQPGFKYLLSSKYRENVKAGREDYMQVISSWVPFNKQEMPGYFFACVIQGLATFIASGWITSYDVIALAVMIFIKAELEALKIDTAAIFDGSESDAIDRIRDCHKRHIELIHYSGLYNSCTSPILLLYSLMCTVVLCSTAYQITSLETSKTQQLMTVMYLIFGVAQLFLYCWHSNEVLYASMDLIRGPYESKWWTQSPSHQRNLFILVVQLSKIITFTAGPFTDLTVATFINILKGAYSYYTLL*
>PrapOR61
MFFKRFIKSIEDPDKPLLGPNYWLLKRSGFILPSSTKAKLGYIFLHELVTVFVLTQYIELYIVRSNFDSVLTNLKISVLSIVCIVKSNAFILFQNKWKKVIDYVTEADTWERNTRDTVRGKIINNYTVYCRKLLNFYWSLVITTEITVCGTPLLKYLSSTSYREALHNETELFPHIFSSWVPFDKYHSPGCWITVVIHILFCTLGAIIMSSFDTCVLFVLIFFGGKLDLLKERCKQIFDDANDEEKILQRLKKIHEDHVKLMKYSRMFDSLLSPVMFFYIVICSLMLCVSAFELTSATNTAQLILTAEYLTFGVAQLFMFCWHSQDVLIKSSDVCSGPFESKWYSANLKQKKYIHTLAGQLRIVHIFRAGPFTDLTLTTFIAILKGAYSYYTLLK*
>PrapOR62
MLTKLEDPLHPLLGPTLKGLRAWGMWQAERGIKPVVYNIVHILATLFVISQYVELWFIRSKLDLALRNLSISMLSTVCVVKAGTFVYWQNDWRNVMNFVSLTELSQSKDKSTEHISREYRKYSRLVTYFYWSLVAATVFTVILAPLVSFLSSPMNRERIINGTAPYPEIMSSWAPFDKSRGVGYVIMVIEHTLICFYGGGIVATYDSNSVVLMTFFSGQLEILKLKCSMLFGDGSNVVSYEEAVSNIKKCHYHHINLVKYSKLLDSLLSPVMFLYIIICSLMICASAVQLTTEGTTTVQRIWIAEYLMALIAQLFLYCWHSNTVLYTSLKLDDGVYESAWWSHGVKIRRSVLLLGGQLNKTIVFTAGPFTRLTLSTFVTILKGSYSYYTLLNSKDD*
>PrapOR63
MLQLLEDHKYPLLGPHLRLLKFTGLWHPVLDRVARLKLLLFCVTTAFFFSQYIKCMLFLNIDSIKLILQYIPFHIGIVKACFFQKNYANWAHLIESISEIERHQMLQKDINIHIKNYIHRSRRVTFFFWALALFSNFSIFTEPYRKNQVGNGTDSYLYLFDGYTPFDRVPPGYYCSMFVQTVLGHVVSAYVVGWDMCVVSIMIFFAGQLKIFRIYNMKIFCSKNDAISFKNVANSHAFYMKLVEYHKLFNSLISTVMFIYLIVISVNLGVCIIQIVVIQNDLGAFLSACLYIVACLIQLLLFYWYSNEVTHESQLLSYSLFESGWYYAPTILQRNIALMAETTNRRLVFKAGPYYEMSLATFVSILRTSYSFYTLLNETN*
>PrapOR7
MATSLDIAKREIRESLRFSLFATHCLGVSFTAPKNRILRIFKNALFFTSVSFIILHASSDAVNIGLTPFSVESVVPLLHTQCYAIFSAIKACVLWYKKTVFQQLLTELAEIWPVPPLTAENQRIKYKSLSTLRRVHAWYFAINLCGVWVYNLTPIFKHYYRRYNGEESRIGTIWSSWYPFDKTQPVPHFFVYLFEILMGQVCVWITLSMDLLFSGLASHIVLLLRFLQTQLKSLTVLNKTEKEYHQEIVNCIKLHQRLIRYCFDIGEAFSFINLVNIILSSINICCVVFTILVLDPFLAVSNKLFLVSALLQVGMVCWYGQDIIHANSNISIAAYNSGWYEMTPRCRRALLFMIQRTQKPIGFTAMNFTYISLLTYTAIMTRAYSYFALLYTLYNKNQG…
>PrapOR8
MSLVIAKQEIKDSLKLCNFFMKLIGFTLHKPTNLYDIIIQKIIFTVTITCVTFHVFTELSFLYVTSTNSPRVEDVVTLIHTAGYGILSITKFTVLCFKRKIFAQLLDDLATIWPVPPLAKGAQTLKINSLKSLRIMHSWYFGLNESGVSLFNITPLCLYLFYHIRGQVYEIKTVWKSWFPFNIYKQKWKHVSVYIFEIFSGQSCVWVMISTDLLFTGMSNHIILLLKILQQRLVSLGNSNRTDQENYREVVGCIQLHQKLIQYYKDLESAFTLVNLINICLSSSNICCVLFTIVLIDPMLELSNKIFLSASLIQIGLVCWYGDDIIQENAKIADAAYNSNWYQLSPRCRRSLAILIQRAQQPIAFTAMGFTKISLITYSAILTKSYSYFTLLYTMYRED*
>PrapOR9
MENETLAKQEIKDSLKLSNTILKLLGFTLNKPATVTDAVVQKCLFITTIVIITIHVLSELACLYVTSITTPQVDQVVPLLHIVGYGTLGILKFTVLCSKRKVFAQLLSDLATIWPVPPLVKEAQSLKNSNLRTLRLMHSWYFALNESGTLFYIITPVGLYIYYHIRGQAYAIKTVWKSWYPFNIYQQEWIHILIYIFEIFSGQSCVWAMIGSDLLFTGMVNHIILLLKILQQRLRNLGRTDSSSEDDGKKLIECIKLHQRLIKYCKDLENAFSLVNLINICLSSVNICCVLFVIVLIEPRLGLSNKLFFGASLIQIGLICWYGEDLIQENANIAEAAYNSNWYNLNPSSRRRLAFLIQRAQKPIAFTAMGFTNISLVTYSAILTRSYSYFTLLYTMYSE…
>PrapOrco
MLNKVKTQGLVSDLMPNIKLMQMAGHFLFNYHSENDGMTSLLRKVYASVHALLIVTQYLCMVANMAQYSDEVNELTANTITILFFAHSIIKLLFFAITSKNFYRTLAVWNQSNSHPLFTESDARYHQLALTKMRRLLYFISGMTMLSVVCWVTITFFGDSVRLILDKDTNETLTEPAPRLPVKAWYPFNAMSGTMYIVAFVFQVYWLFFSMMIANLLDVMFCSWLIFACEQLQHLKAIMKPLMELSASLDTYRPNTADLFRVSSSDKNEKEPLDLDIRGIYSTQTDFGITLRGAGGRLQTFGQPPNNPNGLTQKQEMLARSAIKYWVERHKHVVRLVTSIGDTYGTALLFHMLVSTITLTLLAYQATKINGLNVYAFTTIGYLSYTLGQVFHFCIFGNR…

## Sheet: Pbrassicae_nt
>PbraGR1
ATGAACGATTCTCGGAACTTTAAAATGAATCCAAATCGTATCGAACAAATCAGAAAATTCGATGCATACAAAGAATTTAATGGAAAAGCTATAAAAGAATACGATGCCAAGGAGGTATATGGACCCCAAATTACGGATAAAGATGGCGAACTTTTGGACAAGCATGACAGTTTCTATATAACCACTAAAAGCCTCTTGGTCTTGTTTCAAATAATGGGGGTAATGCCGATTATGAGAGTACCTAAACATGCGCAAACTACAAAGCGGACTACATATAACTGGATATCGAAATCTACTCTCTGGGCTTATCTTGTGTGGTGTTTGGAAAGCATAATTGTGATAAGAGTGGGCAAAGACCGGTTCGCAAATTTCCAACAGAACTCGAATAAGCGATTCGAT…
>PbraGR10
ATGGCTAAGGAAGAAAGAGATACGAAAAGACTCTTATGTCATGGGCCTTTAAACATGGTCTTGAAACTGTCGCGAGTGTTCGGCATGGCACCTTTGACTTTTACACCTGAAGGGATAAAATTCTCACTCGTATACTATATATACAGCATTGCTTTTATCACAGCTTTAGAAACAACAATCTTTGTAGGTTTCGTGCTGGACGTGACGCATCCAAAGCAATCGCGTCGTGCGGCCACCACACATATGATATGGCTTGCTTATCAGTCAGTTTTATCTGCTGTCACTATAGTGGGCTGTTTTGCGGCACCCAAACGCTGTCGGTGTATTCTCGATGCCCTAACTCGCATTGAGAAGATCAGAAACTTTCTGGGCGAGATTAAGTCAAAGAAAATCGTGGTG…
>PbraGR12
ATGTTATATAAATGTATTAATTTAATCATGTTCTGTAATTTTTTATGTGGTTTCTATGTTAAATTTTCAAAATTTTATATGACGATTCTGTCTACGCTTTATTGCGCTTCTATTTCAGTTTTCATACTTTATGGTTTGTATTCAAGACCTCTCATAAGTAAATTTTATGTGTGGTCAAATAATTTTTGTATTTTTGACACTATTTGCTTTATTTTATTTACTTATATTAACGGAACAGTATACGTATCGAAATTCCTTAGCAAGATATCCGAAATTGACGGTAAACTTCAATTGGAACTCTCTACAATTTCTATTAAAACAATATTATTCTTTTTACTTATTTTCCTTGAAAAAATCTTTTACACTTTGGAATATTACGCACGCAATGACGTGAGCACG…
>PbraGR13
ATGATAAAAACATCAAAATTCCTTAAAATGATTTTTATATTGCAATATCTATGTGGATTTTACACCGATTTTTTTAAAAGAAGAAAGTGGAACACTGTTTTTCGGATTATAATGGCAATTTTGATTGTTAATATTTTATATTGTAGTCTGAAAAGCATGCAACAGCAAATCAACTTTTTTTTTTTTTCAGTAGGCTTGCTTAATCTTATTGATTATACTCTAGCTGTAACATTGTCCTTTGTGGGTGGTAATGTCCTACATTATTGTCATAGAAAATTGCTTAAGTTAGACTGTCAAATGAGATGGCGTAAGATCAAGCTATCAATGTCGATAACTGTTTCTATTTTTTTGATACTTTTTTTTGAGAAATCCTTTATTGGATGGGGTTATTATAACAGC…
>PbraGR14
TTTATAACGAAACGATTAGGTCTTTTCTTCAATGGTATGATTAGATCTATTATTTTTGAATGGGTCCTATTTTCTACTAAAACTATGAGAATATCATTTGAGAAATTGGTTTTTAAATCTAACCAAATAATATCAAATCTTGAACCGAAGCATATACTACGAGTCGTTTCCACCTACACTAAATTATTAGAGAACATTAATTCTGTTGGATTGACATTAAAGATAATGATACTTAAAGATTGCATTTTTACATTTTACTACGTCATATTCAGTTCAGTTGGATTAGTATTTGCACCGGATTATTCTATTAGCCCATATATGGTTGCTGAGATAATATTTCAATTGGTGAAATTCGTTTTACCTTGTGTCTTAATGGAGCTGACAAAGAGTGAAGTGGAG…
>PbraGR15
ATGCCTCAAACCATACCTTCACTTATGTGGATTGTTCTCCTTTCACAGAATTTATGTGGATATTATACCATCATCTATAAACGACACATTTTTAATATATTTGCTCGGTTACTTTGCATTACTTTGATATACATTACAGTTTATAAAACTATTACTCAGTTATACAAAGAAGAAAGTACGTATTATACCTATGGTGAAATATGTCACTTATTATATTTTCTTATTGGTGCATTAATGGCCTTTATTGATGGGAATGTATTTTATCGTTTTTACTCAAATGTACACTCGATTATGTCCGAATATTCGTTGAAAATTGATTACCGCTCTGTTATGCGTACGACAACAGTTTTCACGGTTATATTTTTTATAGAGTTCTATATTATATGGAGTTATTTAGCT…
>PbraGR16
ATGACCTCTGTAATTAAACAATCTCTGATAACAATTTTGCTGGTGTCGCGATGGTTCGGAATAACCCCAGTGAAATGGGAATCGCTACAGCTTCGTGTATCTAAGGGTTTTGCTATTTATGGAGCCCTACTGTTTTGCTTTATAGCGATGCTAATGACAAATGAGACGTTTTCTGTTATTCTTGCTATAATTCGAGCTAAGGAAATAGACGTTGAGAACAATCGTATTGAACTCACGTTAATGAAATTAATTCTCAAGGAACTCATTCTATTTGGGTATATGGTATTTAAAGGTCCAAGACGTATGGCTATCATGATTGAAGTTCTTGATCAGCTGGAAAAGGTAACGGAAAAAAAGGACGGATGTACACCGGAGAAAAGGGGGAGGAAATTTTACTAT…
>PbraGR17
ATGTTTTATTATATTTTAATTTTAATAGAAACCGATTTTTTTTATTCGTTTAATTTTTCTTTGACTTGCATTAATTCTGTACGGTCTGCAACCGAATCAGCACGAGTCACTATATATTTGGCATTTTCGTTGTTATGCACACGTATAAGGATCTTTCAGAAGAGGCTCAAAGGTAACATTTGCCATCGAAACGAGACGCATTTTGCTGATTTAAATAAGGTGTATTTGACAATACACGATATGTTCAAGGAAATTTCGCCATCGTTGTCGTCACTGATGGCAATTAATTTGGCGTATATATTCGTTGATTCACTCATCGTTCAATATAAAATTACTTATATGATTTTAGGTAACTCGTCGTCTCAAGACTCCTTTTTTGGCATGAGTATGGTATTACGA…
>PbraGR18
ATGGTGAAATACGTGTACGACTTTAAAAAGTTAATGATACTAAGAATTATATTGGGCTGGTACAATGAATACTTCATAGCTGGATTAATACTAAAAATATATTGTGGAATATCTCTATTGGTTCAGCTTGTCTTTTTTATACATTTACTAATTCTAAATAAATCGTCCTATAATATTAACCTTCTATTTAAGATTTTTGGTATATTACTGGGGACTATACCAAGTTTTATGCTGTCTATCCTTACAGGCGATCGCTATCTATTTGTGTTTTGCAGGTGGAATGACATAATAGACTCTGATAAACAAGCTAAGCGTATTTTCCGAATACACCAGATCATGTTTGATTCAGTACATTTCTTTGTTATTATTTTCTACATAATATTCTATAGTTGGTGGTAT…
>PbraGR2
ATGATTCCGGACCACCTTTTCGATGAGGGAATTAATAATTCTTTATTACAAAAGGATATGGAATGCGTTAAGAAACATCGCGATGTTTATGAAAAGTCTCAAAGGGATTATGAACGTGAACAACGTTATATGCTTTCGTCCCAGGACTCGGATACTTGTGAGATTCATGATCAGTTCTACCGGGATCATAAGCTATTACTGGTGCTGTTCAGAGCTCTTGCTGTTATGCCAATAACGCGTTCCCGACCAGGAACGATAACATTTAGCTGGAGGTCCAGAGCCACGGCCTACGCGATTTGCTTTTATATTATAGCTACAGTGGTTGTCCTATTTGTTGGATACGAAAGAGTGATGATATTAAGGTCCATTAGAAAGTTCGACGATTATATTTACGCTGTG…
>PbraGR22
ATTGCTGTGTTAATTGTCATCGGCATTCCATATTTAGCAGCATTATGTATGTCACAGTCACCGTATGGTATTAATGGGATAAAATTCGAACTAGCAAATGCAGCACCGGTCCTACTCGTAGTGATTCAATTTGTAATATCAATGTTAGTACCTTTTATGTTCTCTAAGGAGAACGTTATCATAGTGAAATCATTGTCCCAAATAGATCACCTGTTGAATGTAGACGAAAAACACTATAGGATATGCAAACGTAAAATTCTGATGGTAAAGCTTTCCCAATCACCATTTACATGGAATGGAGTGAAGTTTGAATTTATTAGCGCGTCACCCTCTATTTTTATGACAAGTCAGTTCATTACATCTTTGATTGTTCCGTTTCTATTTTCAAAACAAAATATT…
>PbraGR27
CCAGGGGCCCCACAAATTAATAATTTAGTCGAATCTAAATACCACATTCTACATCAAATCAAATATTTGCTTGGACTGCAAATGGTTGTAGGCATAAATCGACTGTATTTAATTTTTAATAATAAATATGCAATTTTAGTTGGATATTTTTATACTGTAATTATAACAGGTTTGACCATGTATGTAATACTGAGTAATAATATGACTAGTGCTACCTATATTGTATTTAGGAATACTGTGGTAATAGAATTTGCTCTGTTGTCTTTCAACTCCATGGTACTCTACAAAAATACATTTAAGAAATTCGTTGAGAAAATGGAAATGTTTGATACCATGTTAAATATAAAAAATCATCGCCAACTCGACAGTTTTACTTTAATACATTTATTTATGTATATT…
>PbraGR28
ATGTCGAAACCGGAAGTGCGTGTGAATTCGTTTTTTAAAAATCGCTCCTATTGCGTGGATCCTATTTCAAAATTTTTCATCATAACGGAAATGATTTTGGGTCTTAATCATCTTGCTTTATTTGGGAATATAAAAAGCATAATTATTAAAATCGGATATGCGTACTCCATCTTCGTTTTGGTTGTTTTCAATTACTTCATGTTTGTGAACAATGTTTGGTCCGTCCCTCTAACTGCGTATAACTGTTCGTACTTTTTAACGATAGTTGAGTGTTCGCTGTTGTGGAAACGATTACGCAATTACTTCAAACAGCTCTCCTTGTTTGATACAGTAGCCGATTGCGAGATAATATTATCACGTACTTCAAAATATAATTTAGTACAGTGTATATTTTCAGTA…
>PbraGR29
ATGTTTTTAAAATTCAATGCAAGTGTAACTTTTCGCACTGTTATGTATTTTCGATTACTGTTTGGGCATTTCTTTGATTCTACATCAAATACTATTCGACTCATAAGACAACTGTATTGTGTAGCATTTGCCGCTGTAATGATATATAATTTTATTTATTTTGTCGAAAAAAACCCACTTATGCCTTCATTTTATCTGCCATTAGAATTTTTTATAAATTTTACTCTGTCCATGTTCTTTGAAGGCTTTATTATCGAGGCCATAACTTCTGTCGCAGATTGTGGGTACCAAGGAACATTATCTTATCGGATTATAATTTATATAGTAATTCAAATATTAACAATTATTGCAACAGTTCTATTGAAAAACTCTTTTACTTTCACATATTACGTAATTCAC…
>PbraGR3
ATGTCCCTTTATACCAGTAATGTCTTATACCCAAAAATACCGAATGGCTGGGCGCATCAAATGGAAAATAAACCAAAGAACAAAGTCATTTTCTTGGACGTCACGCCAGCACGTACTCCATACAAAGTAAGACCCACCTCGAAGAACTCCGTGCTACCTTTAAAAGACAACTTAATTACACCAGAGATATACAAAGATATCGTTTATGAAAATATAAAGCCCGTTTTTACTTTATTGCGAATGATGGGCGTGCTACCAATCACTCGGTCCTCTACGGACAAAAACCAGTTTAATATTGCGTCCCCTTCTATGCTATACTCTGTGTTTTTGTATCTATGTTTGATTGGCTATGTTCTCTACCTGTCCCTAAATAAAGTGCAAATATTGAGGACGGCTGAG…
>PbraGR30
ATGAAGCCACATACATTGTTTAATATTTTTATGTATCTACGTTTACTGCTTGGAAATTATTTTAAATCTGATTCGTCGCAAATCAGTCAAATTCTAAAAAAAATATATTGCTCTATAACCGGTATTGTGGTCCTACATTATTTTTTTAACTTTCACGATATTGACCCCTTAACTCCTGGATATTACCTTCCACTTGAATTCTTCGTAATTTTTTTTTTATCTTTGTTTTATGAAGACTCTATTATTGAGAGCATCTCATCGTCCAAAATTATTGATAAGCTTGTGGGGTTTCAAGGACCCATTTCATATCGTATCTTAATATTTCTCTTCCTACAACTTTTAAACATATGCCTAGGAGGAGCGTTTCATTACAATTATTTTTGCAGTGAGAGCTATAGT…
>PbraGR31
ATGAAGACTTTAAAAAGATTTATGTTCTACCGAATGCTCTTCGGATATTATTACGATTTTAGGTCCACCAAATTGGTAAATGTTTATAAACGAATCTACTGTGCTGCTTTTGTTTTGGTTATCAGTGTGTGTGTATGTTATAACATGACATTTAATATCACAAATTCCGTGGTGTACACATTGACAGAGTTTTATTTTTTAATAATAAAATCTTTTTTCTTTGAAAGTAAGATCGAGGAATATTTCTACAAAATACTCAAATTAGACAAGATGTTTCGCATAGAACATAGAATTATTTCTTTAAAAATGTACTTCATTTTTATATTTGTGTTTTTACTTCAATGGGTCGTATTCTTACTCAATTCTAATGAATCATATTTTATTTTTCTGATCTCTCTA…
>PbraGR4
ATGAAAGCCCAAAGAAAAATTTACATAAACACCTCGAAACGGGAAGACGATTTTTTGCCAACGGCGACGTGTATGTTTGCATTCGCTAAGACCTTTGGTATACCGACTTATGGTGGTAAAGTGGCATTAATAATGTCTATAACAATGTTAGTAATGTTAATAATTCTTGAGATCTCTTCTATTTGGAAACTTGTTCGAACTCTTAATGGCTGGAATCAAAATCCAAATGGTAGTGTAATAGCTCGCTTGTCAGGCTCTATATTTTATGGCAATGGTCTATTATCTATGCTCATAACGTGGAAACTGGCAAGAAAGTGGCGCTCTCTATCAAAGTTGTGGTTGGAACTGGAAACCAAATGTAGCTTGCATTTTCCTCCGGACACCAAAATCAGAAAACGG…
>PbraGR42
ATGGAAGATTTAACAAAAGATATATTAGATGAAGAATTTATAGACATATTTCGATGGCTACATCTCCTTCAAAATGTTTTGGGATATTCAAGAGTTGAAATAAAAGACAGATTTGTTACGCCGCCGAAAAAAGCTTTTATTGTTTACAGTTTTATTATGTGGACTATAATTATACCTGCGTCAACAGTTTACTATACAATGACTATGGAAATAAGTAGTGTGGACAATATGATGATGATATATATTCCATACCAATATGCAGTTATATCGTGCATTGCAAGTTATTTGGTATATTGTAATCACTTCAATAAAAGTGACCTTAACTGTCGACTATTTTTGAAGCTCCAAAAAATTGACAGACTGCTTGGCTCAGCATTTGTGAAGAATAATAAAGTTTTA…
>PbraGR44.1
ATGTCCAACACGGAGTATTTATCCAAGGATATTCTTGAAGACCAGTATATCCGATCGTTTTCTCCGTTTCATTACATCGAAGTAGCTTTAGGCACAAGTCGTATCCATTTACGGAACAGATTTGTCACCAGCCCGACTTTATCTCAAAAAGTATATTCTCTCGTTTGCGCTGTGTTGACTTGCGCTCTCCACATCTATGTGACAATTACGTACTTCGAAAAATATTATAAATATCCGATAATTTACTACACTTTCGTATCTCTAGCTAGTATGCACTTTTTGACGTTCGCCTGCAATATTATACATCTAAGATTTTTCAATACTATAGAAAATCAGGAATTTTACGTCCAAATGCAACAGTTAGACAGGTTGTTGAAGGTACATGATTGTTTAAATAAC…
>PbraGR44.2
ATGGCTAAAAGTGAATTCCTCTCGGAAGATATTTTAGATGAAGAGTATATGAAAGCCTTTGAGCCTTTCCATCATCTTCAAATGGCACTAGGATCGTGTCGTCTAAATATTCGTGACAGATTCGTAAGCTCACCTACTACCGCGCAAAAGATTTTCTCTATTTGTTGTGTTACCATCACATTGGTCCTATACATATATTCCATTAGGTCATACTTTATTCGATACTACGAATTTACCGGTATCTATGTCACGAGTATCATTAGTATTGTCTTGTATTATTTAACATTTTTCTTTAACATAATTCATATAAGATTTATCAATTGCAGTAGCAACCCAAGATTTTACATTAAACTTCAAGAAATCGACCGTCTAATGAATTTAAACAAAAATGAGAAGTTT…
>PbraGR46
ATGAAAATTAAAACGATAAATCTTGTTGTCAAACTTGAAAATGTACTCTGCATATATAGAAATTACAATTTTTTCTCAAGAAGAAATCGAGTTCTAACCAATATTCAAATGTTTTTTGAGCTGTCCCTAACTATTATCAGTACAGTATTGGTTTTATCGCATCTGAGATCACAGTCAAAATTCGCAACGTATTTATTGACTCACGTGAATGGATTGATTATAATATTATCCGCCATATGGTACTCTAAATCCTTCAAAAAACTAATCGAGTACATTGAAGCAAATCAATTCCAGTTTTCGACCGAAATTGACTATATTAATATCTTAGAAAGGAAATACAAAGCTTTAAAAATAATGCTTATTTGCTATGGAATTTTAAGTACTATATTTGTAGTCTTT…
>PbraGR5
ATGGACATTATAAGAGAAAGGCCAACCTTCCAAAATGCAATGAAGTTAACAATTTTAATTGGTCAATTTTTTGGATTGAACCCCGTGTATGGAATCACTAATATTGACACAAATAAAGTGAGGTTTTCATATATATCTGTACGTAGTATCTACAGTATCTTGACAATAGTGGGACAATTTGTGGTATTTTTACTCTGTACAATGTACATAATAATGTTTTCAGACACATCTCTTCATTCCATAACCCCAATGGTGTTTGGAAGTTCGAATTGTATTACAACAATTTTATTCTTTCGTGCCGCTATCAAATGGCCCAAATTGATGAATTATATCACTAAAGTTGAGACAATATACCCAAATATTGATGGAGCATTCGTAACAAAATGTAATTTGTCATGT…
>PbraGR52
ATGAAAATAACAAAGGCGAAAGGCGTGAAAACTTTTTACTATGGTAACGAATTGCTTTTACCCAATCAACCGTATCATGATACTTTTCTTCAATTCATGAATACTATTTTCAAATGGGCGCGATGCTTTGGGGTACCGGGTTTGAGTAGTATGCTATGGCGAATATGGGCTGCCGTCGTGCTGATTTCTTTGGCTTTGACGGAGTGCGGTGCTATTTGGAAGGTTATTAGGGCCCTGGCGGGATGGGCAAGGGATACAGCCAACCATAGAAGTGTCACAGCTCGTTTTGCGGGCGCCATGTTCTACGCAGCTTCCGTAATATCCCAGATATTATGTTGGAGACTTTCATATCGCTGGCGAGCTTTGTCGAAGTACTGGGCCTCTGTGGAATGGGTGTTA…
>PbraGR54
ATGAAGTTTCAAACAACCTCATACAAAAACATGCTAAATTTGTTTCAACCAGTTATTATTATAATGTTCATCTGTGGATACAATTTTAAAACATTTACTACGACTTTGTTAAGAAAAGTGATCGCTCAGTTTTACAGCCTCAGTTTAATCATCATCGTCTCATATTCTACAATGAACTGTTGTAATGTAATCAACCCGTCCCAGTTTATGTCACTCCTCGAATACGATTTTAGTGTCCTCAATTCTATGATCTATAATAGCAAAATCCTGAAATTTATCTCCGACCTCAAGTGCTTAGATGGTTATCTCAGAATCAATAAGCGCCATTACAAGATTATCAAGTTCAGATTTTTCTTCATTGCTGTTACACTGTGGATTATTAGAATCATATACACGACT…
>PbraGR6
ATGAAGAATACATCGTATTGGATGCCTATTAAAAGGAACAAAGTGGACGTGTCAGAGTTAAAGCCAGCAAAATCACCGGCGACGTTTCGAGAATCGTTACGGGCTACCTTAATAATTGGACAAGCATTCTCTTTGATCCCAGTTATCGGGGTCTTTCGAAGTACCTCGGGTGTCAGATTCACCTGGTTGTCATGGAAATTCTTGTACCTTTTTCTATCACTTTGTGGTCAAAGTTTTATCACAATTATGTGTATTCATAAAGTTGTCAACTCCCAAACGTCGCTTAATGGAACAACTCCAATTATATTCTACAGTACAACATGTATTACAATGCTAATGTTCTTACAAGTGGCAAGAAAGTGGCCGGATCTGGCCCGATACGCTGCTAAAATTGAGGAT…
>PbraGR61
ATGAACATGTCTATAGTAATGGGTATATTATATTTTCGTCTCGCTGTGGGTAATTATTGGGAGTGTTCTTCATCAAAAATTATTCAGATTTTATGTAAATGTTATTGTGTTGCCTATATAAGCGTATCTACTTATGTTTACTTTTCAATTGGGTTTGAAGCGGATAGTCTCAAAGCTAAATATGATGTTAATTTGTTTTCTTTTCTAATTATAAACGGAGGTTTCGCTATTTGGAATAAACAAGAGTATTTTACGAGATTTCATTCCGGTATAAGGACCATAGACAATATTATTCATTTCACAAAATCTAAATCAGTATGTCTAGTCGCTTACATTACTTTGATGGTCATTAAAAGTGGTTTTAATGTTACGGGTCATATTTTGTTACAACAAAGGTTT…
>PbraGR63
ATGATTCCGAAACATCGATTGCCGTGCGTTGAAGACATCAAGAAATCTATTGGGATTTTAAATCCTTTTCTAAGGATGTTTTCGTTAAAGTGTGATACATTTAAACATAAAAAGTATACAGTGTTATCGATTGTAACATTCATTTTACCGGCTCTTATTCTTGGATCCATTGATGCTTTGACATTATATTTCAAGATTTTATATACATATCACGACGTGGTGGTCTCGATTAAGTACACAGATGCAGTACAAGTAACATTTGATTTTTTTCAATATATCGTTGATTTGTACATTGTATATAGATGCGGCAATTCTTTAGAAGAATATTACAAAATATACGAGAAATTGGATGAGGAACTTGGAATGAAGTACTGTGGAGTTTTATACGGGAAGCTGCGA…
>PbraGR64
ATGTTTTCGTTCAGAAATTTTTCAGTAATTTATTGGATTCTAGCAATTCGTCTCTGCTTCGGACATTTCTGTGAATTGTCTACATCAAAACGGATTAATTTCGTTTGCAAATTCTATTGTATAGTATTTTATGCATATCAATTTTATTTTTTGTACAATATTTCATTTTACGCATCTACTCATCTATACCTACAAGTTATACTTTTATCCTTGAAATCAATATCTAATGCACTTATTTCATTATTCTTTAAGGAGTCATATTTTTTAAAATATTGTGAAGCTGTTGACACGATTGATAAAGTATTACGATTCAATGTCAAGTACACTATTTGTGCAATTGTTCTTTACGTAATGTCGATAATATGCTTCCTTATAAGCCCTACTTTCATGTTTACATTG…
>PbraGR65
ATGTTTAATTTTAACAACAACTTGTCTATAAAATTTCTTTTAGGATTTCGCCTTCTTTTAGGACAGTATTGTGAATTTAAAACTAGTAAAATAATTCGAGTGCTTCTTATGTTTTATAGCTTTGTATTTCATATGCTTATGTGTTTAGTGTTGCAAACGTACTTTGATACAATTAAACCCAAGGAAATGGTATGGTGTATAAAATTATCGAAAATACTACAGCCGGTAAAAGTTATCGCGAACTTATGTTTATCGCTATTCTTTAAAGAAAAATATTTTCTTATATTTTATAAGAACCTCGAAACAATTGATAAAATTCTGAAATATAATAAGAAATTTGATGTTTGCATAACTATTGGTATATTTTTTGTAATTATTTTTGGTCAGTTAATTTTCCAA…
>PbraGR66
ATGTTATTGAGAAAACTACTAGGTGCATCATTTTTCTCTTTAAAGTGGTCTCGTGATAGAGTAGTTGCGACATTTAGTTATCTCGGGTTCGTTTCCTTTAATGTTTGGTACTTTTTGTATTTCTGGTCAATGTATAACGTTTTCATTGGTGATCAAACGATCCTTCGAATTCTATTTGAAACTAAAATAAGGCAGTATGGGGATTTGGTGGAAAATATTGTGATAACTGCCTACGTCGTATACACAATGTGGAAAATTTCATATGACTTAAGCGGATCGACTGAACATATCCAGCAGATTATGGAGATCGACGCTGAGATCGAGAAATTGGGTGAAAAGATAGATTATTCTAAAAGTGCGACCGTATCTTTATTCGTTCTGATTTCGCATTTTGTCGTC…
>PbraGR68.1
ATGATTTCCGCCCTAAGATTCTTGCCATTACGTAATATGGAACAAATTGAGATTCAAGATGTTTTAACACCTATTATACTCACGGGATCGTTTTTTGGATTAATACCGAATAGTGTGAAATTTTCAAAGGCAAAACAAAGTTATAAAATCATCCCAAAATCTATATTTTTAAATATTTTGTGTGTTGCTTTTTTTATAACCCTACATATTACGTTTTTAATTTATCATATATACCTTGTGTTTTACATAGAAGCAAACAGTGATACATCAAAGAAATTAAATTTTGCTATGGAACTTGTTAATTTTCTTATAGTATCTAGTTCAATATATATTTACGCATACGTTAATCGAGCCAAGTATTTGAAAATATTAAACATGATTGTGTCTACATGGAGTGGC…
>PbraGR68.2
ATGTTGCCATCTTGTGAATATAAACGAGAGTTTAACAATGACAGAGAAGAAATTGAAGATATTATAAAACCAATAATCATAACCACAACCTTATTCGGACTCATACCAATTAGTATAAACTTTTCGAAGATAAAACAAATCTATGTCCACATTCCGAAATCAATATATCTAAACAGTTTCCGTTGTGTCATATTTATTTTACTTAATATTGTATTCTTGATTTTTCATATCTATCTTTTATATGCAACAGCTGGGAGTGCTAACTTCGCCAATCTTCCAAAACGTATGAATTACTTATTTGAAAACGTGAATTTTCTAATTGTAAGCGTTACAGTGTATGTAAGTGGTTTTTTAAATCGTTATAAATATTTGGAAATATTAAATAGAATAATTTGGACC…
>PbraGR7
ATGTTTATTTTCAGATTTACTTGGAAATCAATTAATGCAATTTCCAGTTTATTTATAATTATTCTTCACATTTTGTATCTTAGCATACATTCATATAATTATACGTTTCAAGAGGATATTTCATTCCGGCATACTATTCGATTAATCGATCATATGACGTCAACTCTAGCGATAATAATTTTTATAAAAAGCAGTTTTCGTTGGAAAACGTTTTTGGAAAATATAAATAAATGTGAAAGCCTATTAAAATCACTTAAAAATTCTAAGAAGTTTGTTAAGCTTTCTAAGAGAATCATTTCTATCTTTCTAATATCCCATGTTGTCGACCAAGCGTTACACATAGCAACATTTGTGAACTTCATTCATAATTGTTTTACGTTGAGTCTAAGTGAAGAAATA…
>PbraGR8.1
AATATAATTATGGCTACGGACGGGTCATGCGTAGTAAATGGTTCATTCCTGTTTATATTAAGGGTATCCCGAGTATTTGGTTTGGCTCCTATTAGTTTTAAGCCAGTTGAAGATGGGTGTCGTATAGAACTTTTGAAGTCCTCGTATTATGAGTATGTATTTCTGGGAATGATAAATGTTCTACAGATCATATTTTACTTCCACAACCTTGTTTTATGGGATATTATGGGAAAATTTCATGTTATTTTATTTATAATAAAATTGATTAATTGGTTACCGTTATTGATGTTTTTGAACATTGCTATATTAAGCAGTAAAACTCGTATGAGAGTTTTTTTAGAACGCGTTCCGATAAATAAAACGTATAATGCAGTAAAAGAGCGGAGACGATATACATTG…
>PbraGR8.2
ATGGATGGGTCATGCGTTGTAAATGGTTCGTTTAGGTTTTTACTGACATTATCACGTTTATTTGGTTTGGCTCCTATTAGATTTTACCCAGTAGAAGATGGGTTTCGTATAGAACTTATGAAGTCCTCGTACTACGAGTACATATTTATAGTGTTTCTTGATAGTATACATTTCACATCCCTCTTCTTCTACATAATTTCTTCGGAAATAACGGAGGATATTCATGTTATTTCTTTGGTGTTAAGGATCCTTGATTGGATTGCACAAACGATGTTTTTAAACATTGCTATATTAAGCAGTAAAGGTAGTTTGGGATCATTGATAGATTGTATTCCGATAAATAAAAAAAGTAATCTTGCAAGAGAGCGAAGGCGATGTCTTTTGATCATGTTGTTTTTT…
>PbraGR8.3
ATGGGTGGGTCCTGCGTTGTAAATGGTTCGCTTATGTTTATATTGAGATTGTCACGTATGTTTGGTTTGGCTCCTGTCAGATTTAAGCCAGTAGAGGATGGGTGTCGTATTGAACCTTTGAAGTCTTCGAGTTATGAATATATATTTATAGTATTTCTTAACGGTATATATTTCACATTTTCCTACTTCCAAATAATTTCTCCGGCAATAACAGGAAATATTTCTGTTATTTCTTTGGTATTAAGGACGGTTGATGGGACTGCAAAAACAATATTTTTAAACATCGCGATATTAAGCAGTAAAGGTAGTTTGGAATTGTTGACAAATTGTGTTCCGATAAATAAAAAAAAGAATCTTGGAAGAGAGCGACAGCGATTTCTTTTGATCGCATTTTTTACC…
>PbraGR8.4
ATGTCACCTGAACCAAAAGTCTCAACGTGGCAAAAGTACTATGGATTATTTATCATCCTACCATGGATACAAATTATTTTCGTCTATTCAACATATAGAGAGATTATACACATTAAAGAAAGCTCTTCTCACATTTCGAGTTTGCTATACATAATTTATACAACATCTTCACTATTGTGTGTAAATTTTGCTGTTTGGACTGCTCCAACCCGTATCTATTCCTGGTTATTGTGCTTAAGGAATATTGAAAAGATAATAGTAAGAGCTAAGAAAACAGAAGAAAAGGAATTGTTCAGATGTATTTTGTTAACTGTCTACTTCTTAACAATATTTTGTTGTATGATCACACATTCTTTGGATATGTGTAGGCAATTGAATAAATTGTCATACATTTGCGTG…
>PbraGR9
ATGGAAGCCGAAACCGAGGCATCGTTTAGTTTTCCCCCGGAAGGGCCGAGAGCGTACCACACCGAGGGGGAGTGTACCGTTGGAGGAGCGCATGCCTTTATTTTGCGGATATCGCGCGTGTTCGGTTTGGCACCGTTGCGGTTCGAGGCGCGCGGCGAGAGTTGGGCTGTGCGGGTTTCTCCCGCCGCCTCACTCTACAGCTACATACTGGTTACCGCACTCGTGGCTGGCACGGTGTACGGGCTGTGCGCGGAGCTGCGGGCGGGAACGGCGGCATCACCGCGCATGGCTTCGCAAACGGCACAGCTGGTTTCTGCATGCGACGTGTTGGTGGTGACGCTAACAGCGGCCGCTGCCGTATACCATGCGCCCGAGCGGATGCGTATCATAATAGCTTTT…
>PbraIR1.1
ATGTTATTGGTATTTGCAAAAACTCTCTCTATACCCTTGTTGTTATGGATATTTATTGGCACTGCAGCTGCGTGGGATTTGCGATTTGTGCTGGACTACTTTAGAAGACGAGACGTCAGACATCTGTCTCTTCTACATTGCACCTCGCCTAATGACGAATTAACTTTTGGTCACACATTCATTGATAACAATGTCAGAATATCAACGTGCAGCATTAATAAAGATATAACGAAAATAGAAAATGTATTACGAAGACACTCTGTTCCCGTTGGTGTGTTATTGAACGGAGCATGTGATAACACATACAATGTACTAGATAAGTCATCGAAGAGCGGTCTGTTCGACGCGTCGCATATTTGGCTCATTTTAGACCACACCAGTGCTGCACGGAACATGACT…
>PbraIR1.2
TCAAGTGGAGTTGCTTTGACATATATAAATGGTAAATTTAATTTATACCTCTTTGTGCGAGGCACAATGCGATTTCACATAGTTTTATTGTATCTTGCGAAATTTTCCTTTGCGTTTAGCCAAGAATCGGTGGAGATCGCAGTTAGTTATTTTCAGGAGAGGAATGTCAAAACCGTATGTTTACTATCGGGTTCTAATCATATAGGTATTCGATTTGCTAAAGAAGCCAATAAACATTCAATAACAGTGTTGCAATATATAAATAATGACACTACAAAGAGCAGTTGTCAACGTCAAGTTTACACACACACAGGCATCGTATTAAATACAGATGATCCACCTTTTCAAGATGTACTGTTTAATGCCTCTGAAAATAATATATTTGATTCAAACCGCATT…
>PbraIR100a
ATGACTCTCACGAATCATAAAGATTGTATAAAGATGGACGAGTGGACGATGTACTTAAAGATAGGAATATTTTTTACTCTAATTAGTGTTGGGTGCGGGTTCGAGATATTAAAAAATAATCATGAAGATAATAAAATTGATACCTTAACCACAATTATTAAAGAAAATTTCGTGTACAACGGCCGGCACACATTTCTCCTTATAGGGATGTTTCCTGATCAATTTTATTCGAAACTCAAACATCTACCTGTTACATTTACTATAACCGATATAAATAAAGAAGACGCACAAATTGAAGATGTCGTTCCATATCCATCAAATTATATAGCTTTTAGTTGTCGATCAAGAAACGAATTCGAATCAGCACTATTTAAAGTTGTAACATTACCATATTGGCAC…
>PbraIR100c
ATGTTGAGCACACGTACTATATTTTTACTGTTCATTCAATTTACGTTTTCTCGTCCATTTATTATAGACTCTGAAGATAATAAAACTGCAGGTTGTGTACGGGATATCATACAAAAAAATTTCGAATTTAAATCACAAATAACCGTCATTAATGGAGATAATTACGAGATATTACCAACTATTAATCAAATGCAATACATTTCCGTACAAATATTAACCTCCACATCTCATAAATTCACTCTACCGTTTAATAGAGAATATTTGATAATTTCGAACAGTTGTGACGATTTTGAAAACAAATTTCATCGCATCACAATAGCAACGACGTGGAGTGCTAATGCTAAACTTCTTGTTGTTCTCGAAAATGCTTACGATCCGAGATGTATTTTTGACATACTC…
>PbraIR100d
ATGAAGAGTCAGTTTTTCCTAATATATTGTGTAGTGACATGCTATGGAGATTTGGAGCTATTACTTAATGCAAATAATATTTCGAACAAACCAGATGACTGCGTGAATGAGTTAATCAGCAAGCATTGTGGATCGCATGTAAGCATTGTCTTATCACCTAGCAACATAAAATTCATTCCAATTAACAGTAATTGTGTGACATATGTTGTAAGATCTTACGAACACAACGAATGGTTCATAACAACAGATATTTATATTATTTATTTGAAAAGTCTGGACATGTATAATTGGGAGTTAAGATATGATGAAATGTGGAATCCCCGAGCGAAATTCATAATTGTCATATCACATAAAGTCACAAAATTGGATTTAAAAAAAGTCTTCGATAAATTGCTAGAA…
>PbraIR100f
ATGTATAATTGTTATTTACCTTTCACGATATCCAATACTATAAAACAAAGTATCGTATCTAGATTAACTGATCGTACAAAAATGTCTTCAATGAAAGTGGTGCTGCATCTTTTCCCGATCATACTGGTAAAGTATCGTGTATTATCTTTTGTGAACAACTCAGCTATTCTGAATAAAGTTTATTATGGAGAGGATTATTTGAATTCAGAATGTGTAAAAAAATTAATCACCGACCATCAATGCGGGATTCACATTACTATCGTCGTTCCCGATGCTAATTTCCAAAATTTTATTAATATAAATAGCAGCTGTTACGATTATGTCGTTGTAACATACGAACCTGTCGAATTGCCATTTAATACCAATTTGTATCTTATCTACTATAATGTAAATAAAACT…
>PbraIR143
ATGGAGATGATACCTTTATTTATGTACCTTTTAGTTTATAACTCTAAAATAAATTCACAAAACAGTGAAAGTTACCATAATGTGCTATTATCAAAATGTGTTGTGGAAATAGCTAAAAGAGATTTAAATTATAAACCCACGATTTTAATAAACGATCATGGAAAAACGAAATCTAATAATGATTTGTTCAAAACATTAGTAACAGACGTACATATTAGTGGAGTACCTAGTACAATAATTAACGAATACATTTGGTACAATAATACTGTGGAAAATGGTGATATACTAATAATATTAATAGTGAATGATTGTTTAGACCTAATAAATATGCATTTTATTAGTAAAAAAATTAAGTATTTAATAATTTTTGAAGATCAAATTCACTGTCAACGCTTCGAT…
>PbraIR2
ATGAACACAACATACACGGTTGGCTCATTATTTAAATGTGATAACCTTCAAACACTGATGTACAAACACGAACACGATCCAATCTGGAGGCAAACAGCTTTGGGTTGCTATGTTTTGGACATTTTGAAAGATATGCTTCAATTTAACGTTACATATGCACCTAGACTTCCACCTTATACTGATGACTACGAAGTTCCATCGGCGAGCAACTCAATAGACATTTACGTTCGTCCTATGATGTTCAAAAGGGAATATTTAGCTGATGCTTATCCGATAAATTTCATTTTCCAGTGGAGGTTCGGCTTTCTGCTTCGCTACAAGAGAACTGAGCTCAAGACATTCTTCACGTTACCCTTTTCAACTCTAGTTTGGACTTGTCTAATTTGGACTCTATTTCTA…
>PbraIR21a
ATGAACGTGTTAATTCTATTATATTCAACATGTTTTATGTTCTGGCGTGTAAAAGGAGAGATTGAATACTATCCATCGATGGGCGAGATAAAAAAAAATCGCGATACACAAAAACTTCAATTACATACAAGATTTAATGTGTTACAAAACTCGAAATATGTAAAGAAACGTGGAGCAGATCCAGTATTTCACGGTCACCCAAAAACAAGAGAAGAGCTCTGGCGGGAAAGATTCTTGCCAAAAGATAAAAATGTCGATCAAGTGCTGTCCCTTATACGTCTCATCCACAATATCACACTTAAATATTTAACTGATTGTACTCCTGTTCTTCTTTATGATAAGCAGATATTTTCTGAAACCAAACTGTTTCAAGACCTCTTAAGATCTTTTCCTGTGGCC…
>PbraIR25a1
ATGCTACTATTTGTAACATTTATCCTAACCATATTTCATTATTCGTTTTCACAAACGACTCAGAATATCAACGTTTTATTAATTAACGAAGAAAATAACGCTTTGGCCGAGAAATCTTTTGAAGTAGCTAAGGAGTATGTTAGGAGAAATCCTAGTTTGGGTCTTGCTGTCGATCCTATTATTGTCGTCGGTAACCGGACTGATGCTAAGGCGTTTTTAGAAAATGTTTGTAGAAAATACACAGACATGGTGTCTGGAAAGAAACCACCACACGTAGTACTTGATTTCACAACGACTGGCGTCGGGTCAGAGACTATTAAATCATTTACTTCAGCGCTAGGTTTGCCCACGATATCTGGGTCTTTTGGCCAAGAAGGTGATCTGCGACAGTGGCGAGGT…
>PbraIR25a2
ATGCTACTGTTTGTAACATTTATCCAAACCATATTTCATTATTCGTTTTCACAAACGACTCAGAATATCAACGTTTTATTAATTAACGAAGAAAATAACGCTTTGGCCGAGAAATCTTTTGAAGTAGCTAAGGAGTATGTTAGGAGAAATCCTAGTTTGGGTCTTGCTGTCGATCCTATTATTGTCGTCGGTAACCGGACTGATGCTAAGGCGTTTTTAGAAAATGTTTGTAGAAAATACACAGACATGGTGTCTGGAAAGAAACCACCACACGTAGTACTTGATTTCACAACGACTGGCGTCGGGTCAGAGACTATTAAATCATTTACTTCAGCGCTAGGTTTGCCCACGATTTCGGGGTCTTTTGGCCAAGAAGGTGACCTGCGACAGTGGCGAGGT…
>PbraIR31a
ATGCTGTCTATGACATTTCAAAGCAGAAAAATAAAAATGTTTTACGAAGCTATATCGTTAGCTTTCAGGTATAAAATTGTAGGTAGTATTATTATTTTTGCGTGCTCCAATAAATTCGATGCAGCCAAAATAATTCGAAATTTCCAAGACTTTAACCTTCCGGCTACAGTTACCTGTAATGCTGAAATATTTCAACAAATCCATCACCATCGCTTACAAGGAGTATTATATATACCACACAATCATAATGAATTAGATCAGGTGGCTCCAAAATACTTTTCGAATTGGTACAAATGGATAATTCTCGCTGATGATATTCCTGATGCCCTAAATAAAGTGCGGTATGATGCGGATATTATACTCATAAAACCAGGGCAATACGAAGCAGACGGAGGATTA…
>PbraIR4
ATGATTTTACGTTTTATGAAATGTCTGGTAGTCAATGGCGTTGCAGTCGCCCTCAATGTGGATAAAAAACCTCGTTTTATTATAAAAATTGGAGTTGTAACTTTATCGACGAATTTAGCTCGGAACACATCAGTGTTGGCTAAACATATCAAACAGCTCAACGCATGGGAATTGAATTCGGCTTCGTCTGAATGGATAATAGCTTTGAAATCTATATATGATAGAAAATACATATACAAGGTATTAAATACATCTGAACTCCGTTACGACCAGAATATAGTAGTCACTTTACCTCATAATCTGTATAAAGGCAATAATATACTTTGCGCAAACAACTTTGATATTTGTTTGAAATACCATAGAAACACTACTCAACAACATTTTCATTCCCGGAATTGT…
>PbraIR40a
ATGCTCCCCAAAGACTTCTCTCGAGCTATAGTGGATTTAGCTGCCGGATTACCGACCAGAGCCATAACTATTGTAAGAGGGAATTCAACCAATATCAGTACAGAAGTTATAGATAACCTAATATATGCGTTAAGTAAAAACAATATTGGAGTTGTTTATATGGACTTCAGAGCAAATAACAGCAAAAGCACCTATTATGAACATCAAAGGAAAGGTCTAGACACATCTGAAGAACGAACAAGTTTCGTACTTTGTGAGGCTTACGAATGCGAAAATATTATTTCTGAGTTAACAGATATAAATTTCATCCACCGTTCGACGCTATATATTTTCTACTGGGAACACGGGGCAGTTAGTAGAAAGTTTTGCGACAGTATCCAAGAAGCCATGAGAGTGGTC…
>PbraIR41a
ATGTTATTGGTACCCGATTTTTTTCTTCCTATTGAATTACTTTTGCAAACATTAGTAGACCAGTATCTCAATACTTCTTACTGTACAACAGTTATAACTGAAACGCCGTTGAAAATTTTACCACAGATTTCACATCGCTATATCCTTTTGAATCAGAGCCTTGGGGATCTAATACTGGATGCATCGGAGGCTGGTTGTTCAGACTTTATCGTGCAAATAAGTGAACCTAAAAGATTTTTTTCCGCTTTGGATTATGCAATACACCGCGGTCTTTTAAGGCGAAGTGACCGAAAGATAATTTTGTTACCATCAAACAATACTGAGGATAATTCGCTTCTAGATGTGTTGAGAATGAAAGAAAGTAGTTTTGTTGTCAATCTTCTTCTGGTGCTGCCTTCT…
>PbraIR64a
ATGCATTTTTTGTCCAACTTAAGTTATTGGATATCTTTAACTGACTTATCAGTTATTATAAGTATTTTTAAGTTAAAAAATGTAGGAAATGTTATTCTGCTTCATTGTTTTGAATTGCAGCATTTTCATCAGGTTCAGAAAATGTTTATAGAAAATAACATGCGGGTATCTGTATCTCATATAAATGATATTTCTGCACATAATTGGTTGTATCAGTATTCAAGGTTAGGTGTAATTGTTGACACAAGCTGTAACCTTTGGGAAACAAGTTTCAGTGCCTTCCATGAGCCATTCCAAAGCCCTCTCTCATGGATTTTGAAATCTGATAATTTTTCAAAAACAAAAGACATTTTATCTCAATATCCTATTGAGTTTAACTCCGATGTAAATGTATTATTA…
>PbraIR68a
ATGGCAGGACATCTGCTTTTTCTATTAAGTGGGCTATTTTTTAATTATGGTGTGTGCGACATAGGATCTATTATTAAAGATATCAACATTCGTAAAGACCTACAGAATATCATCATTACGGTACTCAATGATCTGGCGAAAAGAAATGATGTCACTTGCATCACGGCAATTACTGATGATATCTACCTAAATGTCTTTGACGGGGGATTGTTTAAGAGAACTACGCCTTTGCCTTTTCTGACGATTGTTGTTCGAGAAAATGAGGATTTACTTTCACCAAACTTCGATACGTTGGAATCCATTTCTCGTGCGAAAGATGATGGTTGCAACGTGTATGTGATTTTATTGGCTAATGGCTTACAAGTAACGAGACTTTTAAAATTTGGGGACAGATATCGA…
>PbraIR75d
ATGGATCTCTCTTCGTTTATATTAGCATATTTTTCGTCAAAAAATGTGTCTTTAATTACCGCGTTCTTGTGTTGGAGCCTAGATGACATACGTAATCTACAATTTCGCACAAGGTCTACGGGACTTCGTCTGCGAGTATACATTAGCAAAGGTTCCGTGATACCTGAGATGCCGGCTTACCGCATCTTCCGCGAGGGCGTCGTGCTGGACCTGAGCTGCCCTGATGCACATCTGATTCTTAACAAGGTTTGTATCCATAAGCTCTTATTCATGAGTAATGCGTCGGTTAGTCGCGCTTTTAATCTCCGGCATTCATGGCTCTTATTGCCCAATATTCTCTCCAACGATACTGACATAGTTGATTTCCTCCAAGACACGGTCATCCTGCCAGATGCAGAT…
>PbraIR75p.1
ATGAATTTAATGAATATTCTTTTCTTAACCGGGTTTAATTTTATTTATGGCCTAGACCGTAGTGTATTTGATATTATTGGCTCATTTGTGGTTACTGAAGAAAAACCAACATCTGTTCTGATTCCAAGATCGTGTTGGAAGAATTCCGAAATCAAGGTGCTTAGTAAAATTATGTTCGAGGTTAACATCAACGTTGGCTATTCGTTACAACCAAATAGAAGCGAATATTTTGCACACAATATTCTAATATTAGTCGACCTATCGTGTCAGGAAACAAATTTGTTTTTAATAAAGGCCAGCGCACAAGGATACTTCAAATCACCATACAGATGGCTTCTTTTAAACACAGAAGGAAACAACTTTGATGTATTGGATCAGCTGGATATGCCACTCAACAGT…
>PbraIR75p.2
ATGATGAATTGTAGGTTTGTCATATCTTTTATATTATTACAAAATTCCATTGTTTATGGCAAGGATACAAATACAATTGATATGATTCGAAGCTACGTTGCTAACGAGTGGACACCGACGATTGTCCACTGTAATTTATGTTGGGCGAAAGCGGCACAAATTCGTTTACATAAAGAGCTTGGTAACGTGGGTTGTCGAGTTTCTTCAACAATGGAACCGTGTAGTACACGTCAAGACCATAATTTGCTGTTTTTAAATGATTTGAACTGTCCTGATGCAGAACAGGCGTTTCAAATAACCAGTCTTCTAAGATTTCCGTACCGGTGGTTTGTCCTTTATGATGATATGAATAATAGGACAAACGAAAATAGAGAATCGATCAAGAAGCGTATTCTAGAT…
>PbraIR75q.1
ATGCAATATAAAGTCTTGTTTTTATTTTTATTTTTAAAAAGTAGTTTGTCTTTAACCTTCAATGAGGTTAAAATGACAGTGGATTTAGTAAACTCTTTTAACAAACCTACCGCAATTTTTGCTTTCATTTGTGAATTTAAACATAAGGAAATTGTACAGCTGGCAAAATTGTGGAGCCAACATTCGCTCTGTTACGTTCTTAATAGTGAGGATTTTAACAAATTTCCTATGAATAAAGATGTGTTTATAATAGTCGAATTGAACTGCCCCGCAAGTAAAGCTTTCTTACAAAAGGCAAATGATACAAATAAATTCGGAAACCCCTCACGATGGTTAATCATCGAACAAGTTGAGCAACTGGAAAGTTACAATTTTTTGTTCGACTCTAATGTTATTGTT…
>PbraIR75q.2
ATGAGAGGGTATCTTTTGATAGTTGTTTTTATTATAGCAAAGAAATGTTCTGCAGAACATTTAAATACAGACTTAATTTTAGATCTGAGAAACGAGTTTGGAAAACGGTATTCATTGGTATTTATGGATTGTTATAAAGAAGACGAACTACGTGAAATGAGTTTGGACATAACTAAGAAAACGAATGAACCAATAACGGTACAAATTATGAACAATAAATTCAATAACGTCAAACAAAATATAATTTTTATTGCGGATGTCGGATGTTCAAATATAAAGCAATCTTTCATTACGGATGAAGCGAAAAAGCTCTTTAGACCGCCATTCAAATGGATATTTCTAAATAAGCAACAATTAAATCTAAGCGATTCGGTTCTTTTTGAAGCTGGAAACGTTCAT…
>PbraIR76b
ATGGCGGGATTAGAACTTATATTTTCTACTGTGTGCAACGCGACATTTTGCGGAACTATAGATGATAATCCATTGCACGATGTTAAACCTGAACGCCACCAGTTGGAAAATTTTGTAAATGGCAAGCATTTGAGGATTGGAACGATCAATAATTACCCGGAGAATTGGGCGGAAAGGACTGAAAATGGCACATATATAGGCAGGGGAGTAGCATTCGACTTGGTGTATATATTACAGAAGAAATTCAATTTCACTTACGAAGTTGTAATTCCGGAAGGGAACATTTTGTATAGCGATGACAGACCAGTTGAATCCCTCATTGGGCTTCTTACCTCCAAACGTATTGATGTGGCAGCGGCTTTTATTCCAATAATCAAGAACACAGATAAATTCGTAACA…
>PbraIR7d.2
ATGACTTTCATAGACAGACCTTCACCGGACAATTGTTCAGTTTTTGACACGCTTGCGATAAGTGCGGCAGAAGTGGCTTTAAACAATTTTAGATGGCAGTACGCCTCGTTAATCCTATTTAACCCGGCATTTTTCTGTGGTGTTAACGTTTTCTTAAAATTTTATCAAAAAAGCATAATCATAGGACAGAGCACATTCAACCCATGGGTTGTGGAAAACACTAAACAATTCGTCTTATTCATAAGTGATTTAACGGATCTGTTAGATTTCTTGGACTGGTTGAAAACTCAAAGATTTAATAACACAGGAAAATATCTGGTGATATGTAACACAATAGCTGGATGGACCTGTGATGAATCTATTGCCGTTAATTTGCTTTGGGAGTATAGGATGGCAAAT…
>PbraIR7d.2.1
ATGTTTGAAAGATATCCAATTGAAGAAATAATAGAATTAATGGCACAAAACGCTGCTCAAGTTGCTTACCATAGTTTCAAGTGGCAATACACAACATTGATATTATTTAACGTTTCATGTTTATACGGACTTGACGTATTTGTGAAATTATATGACAAAAATATTAAAATATACAATGTGATGGAATCCGTTCCGGATTTAAATAGTGTTAATCAGTTTATCTTATTCGTAGCTGATGTGGCAGATACACAGGCGTTTTTAAATTTAATGGAAAGACAAAATCTTAACTCAAACTCTAAATTTATAATAATTTGTAAACATAGCAACGAATGTGACGAGGCTGAAGCCGTAAAAATATTGTGGACTTATAGAATTTTAAACGTAATATTGATTAAAAAC…
>PbraIR7d.2.2
ATGTCTTACGTATTAGAAAAAGATATTATAGAAAGTATAAATACTGACAAATTGGCAGAAAGTGCTGGATATGTTGCTTATCACACATTGAAATGGCAATTGACAACCTTAGTTTTATTTAATGCAACCTATTTATATGGAGTTGGTGTTTTTGTGAAGGTATATGGTAAAAAAGTTAAGTTGAACACTATTTCAAAATCCATGAAAGATAATCATTTCGTAGAGAACACAATACAATACGTCCTATTTTTAAATGATATTCCAAATATTGTTTTGACTTTAGAAACACTGAAATTGCAACAATTTAACCCAAATTCGAAATTTATTATTATATGTTTTGATGAAAATGAATGTGATGAGAACGAAACTATACTAATGTTGTGGAGTTATAAAATTTTA…
>PbraIR7d.3
ATGTTAATTTTACTCGCCTTAATAATTGTTATCAAACATTCTTCCAGCACTGAAGTTCATAAAACAGCAGCTGTTATAGCCAATCAAGAGTTTTCGCCTAATTATCCAACAACAGTTATATGGTGGGAAACTGCTCCAGAAAATATACATCATTTTACTAAAGAATATAAAGGTCTTGTAGTAACACTTTCACTTAATTATACAAATGAGAATGAAACACTAACCAGAGAATTCGTGTATGACCAAACAGTCATATACGTTAAACATGTTGAAGAATTCAGCTTAATTTTAAAAATGGTAAAACCTTCTTTAGAACCCATCCAACTTATTTTGGTGTTAATTGAAGTGAATGAGTCTAGGATTACAAATCTCATACAGGTTGCTTGGAAAAATGAGGTT…
>PbraIR85a
ATGAAACTCGAAATACGTGTACTATGGCTTCTTCCATGTTTTAGTTTGTGTCTAAAACCAAATAGTACTCTCTACAAGGAAATTATTGAGTATCATAACGAAACGTTCTTCAAAGCGGAATATGCATATGAAGTCGTGACCAAAATATTCAACGCATACAAGCAATGGTTCTTTACTATAACGTTCTGCGAATTCACATACTTCGAAAATCGAATCCTTAAATACATTGAAAACTACGGCGATGGATACCCAGTGATGTTACTCAATGGTTGCCCAGACACTAACAACACTAAAGTAAAACCAAAAATTAATAAACATGGTCAAACAGCGTACGTGGTTACTTCAAATGATTTATCGATAGACGAAAGTGAATTTGCCATAGAAGCATTTATACGCACG…
>PbraIR87a
ATGATATCTTTTGTGTTTCGATATATTATTTTAGCCAGCACGATGTATACAGTTTTAAATGTGAATCCTTTACTGATGCCGAATGGTCTGGACGAAAGTGTTAAAGCATCCCAATGCGTCTTAAAACTTTCTGCTAAATATTTTGTTGAAAAAAAAGCTCTGAGCGGTAGCATCGTGATTGTGGGAATTAATGCCCAAGCGTTTACCAAAAAGTTTCTCTTGCAAACCGTACACAACGGAATAGAATATTCGATAATGGTTAAAACTCCGTATTATCCACACGCAAACGCTTCACACTTCCGTGAAAAGGCCAAAAATTATATGATGGTCTTAGAAAACCAACTTGATCTAAAAAATTATCTTAAACTATTGAGTAAACTACCTACTTGGAATCCATTT…
>PbraIR8a
ATGGAGATTTATATTTTATTTATATTTATTTTTTTGTTTAATCTATGTTGCGTCGCGTCTGAAGCGAGTCTAAAGTACATATTCATCCTAGAAAAACACGATGTGGATGTACCGGAACAAATTGCTACAGCAATCAAAACAATCGAGAAATCAAAACCAGGACTCCGTGTTAGTGATGACATCATATTTCTAGACAGAGAAAACGAAGAAGATGCCTACAATCAACTTTGTTCCTCACTCTCCAAGGGCGTGTCTTCAATCATTGATCTGTCCTGGGCCTCTTGGGAGATGGGATCTGGTCTGCCTATCATCAGGTCGACTCTGGACTCACAGGATCTGATTACCGCTATGAATAGCTATTTAGAGTCGAGGAATGCGACGGACGCAGCTATTTTAGTT…
>PbraIR93a
ATGCAATTATGGTTCGTGATTTTGTGTTTATTAGGCCGCGTTGCTGCGGAAGATTTTCCCTCCCTCATAACTTCAAACGCATCGATAGCTATAGTGCTGGATCACCAGTTCCTCAAGGATCAGTACCAGGGTATAACGGATGAGCTGAAGGATTACATCAAAGAACTAGCGCGGGTTAAGCTTAAGCATGGTGGAGTGGTTGTGCATTATTACTCTTGGACTGCCATCAATCTGAAAAAAGGTTTCCTTGCAGTATTTAGCGTAACTTCATGCGAAGACACTTGGTCATTATTTAAGCGAATTCAAGATGAACAAATTCTTCTATTTGCTCTTACCGAAGTGGATTGCCCGCGGTTACCATCCAATGCTGCTATCACCGTCACGTATTCTGATCTCGGT…
>PbraOR1
ATGCTAGATGAGAAAATGTCCAAATTCTATGACTATTTCATAAAGCTTGCTCCGCTACAAGCTATCATAGTATTTATAGGTGAAATCTATTATTTGGTACAGCGGAGTGGAACTATCGATTTGTACAGTCTCGGAGAGGTCCTTATAAATACACTATTAACTTTCATTACTTTTGCACGTGTGTTGTATCCTAACTTGAAATTTTATGGAGTTATATGGAGAAGGTTTATTAAGGAGTTTCACTTGGGTAACTTTATGCAGTGTGGAAGGAATTATAAAAAGGTGGCAGATCGAATAAACAAAATCTCTAATTACTATACGCTTGGAATGGTACCAATAATATGGTTTGGCGTTATTCTTTTTAATTTATCCCCATTTTGGGCTAATATAACTAGTGGG…
>PbraOR11
ATGGAAATGAAAAATTATGCGTCGAAAAAATATACGGACTTTTCACACACATATAAAATTATAACCTTCATGATGCTGGTGGGCTTTCAGTATCCAAAACCGGAGCTACACAGAGCTCGTGCTGTTGCATTTGTTTGTATGCTTCTCTCTGTAACGCCTGTATGCATTTTTATCTTCATTGACATATATAAGTCCATTCTTGTAAAGAACTTCGTCACCGTCATTCGTCATTGTACCATAGTTGGACCGTTCTTGGGAGTCTTTTTTAAGATAATGATAATGCACATTAAAGAAAAAACAGCAATGCAGATAATAAATGAAATCAACCGCGACTACGAGCTATTCAACACGATGTCGCCCTCGTACCAAGAAATAATTGACGCAGCTATCGTTAATTCC…
>PbraOR12
ATGTTATCATGTATTAAGAATATTTTTTTTAGACTTAAAAGCCGTTTGCAGAAAAATTCAATAGAAAATTTACTTTGGCTTGTAAACCTAATACCAAGTGTTTCGGGGTCCTCTTTAGGTTCTAATCGGAAGCCTAACGTCCTCTTTTGGGTTGTTTCTGTGGGTCTACTTACATACGTGTATGTAGCGGGGAATGTGATGTTTCAACTGAATTTCGCAAGAAGCCCCGGTGATTACATCAAGAGTAATGTCAATGTTTTATTATTATTGCTCACATATAATAACTGCTACTGGTGGCTAAGACAATCAACACTTTTAAAGAAAGTTTTAAAACAAGTAAAAGAAAATGACAGACTTGCCAAAGAGTCACCCGGCCATTTTGAAATTCACGAGAAATTG…
>PbraOR13
ATGGTTTTTAAATTATCAAATTTTTTTATCGAAACCAAAAATCACCTAAAGGGAAACCGTATTGAAAACATCTTATGGTTCGTTAATATAGTTCCTAAGCAGCTTGGATTTTCCTTAGAACGGGATAAAGTGTTTGTACCATTTTGGATTGGAACTGCGTTCATTTTAATTTACGTATATGGAGTTGGAAGTATAGTTTATCAAGCGAAGTTCGCACGATTGCCAAGCGACTTCGTGAAGAACTATTTTAACGTCTCGATTCTGATATTTGTTTTGACTAACTGCTATTGGTGGATAAAACAAAGACCGTTATTGAAAACTGTTTTGAAGCAAGTTACCGAAAATGATAGGTTATCAAGAGAAACTGATTGTCTATTAAAGAAACACGAGAATCTTTTG…
>PbraOR14
ATGTCTTCTTACACAAAGAATAAAACGTCAGAATTTATTGCTCAGCTAAGCAGGCTACAATTCATCTGTGGCTTAACTTACGTGTGGGTTGACAATAAAAAATCGAGATTTTTCGTTTACTTCAACAAAGTAGCCACAATACTCCTGTATTCCTTTATCCTTTCTGAAATCGCGTCACTCTTCACCCAAACACATTTATCTGAAAAGCAGGCGTCCGATCAGATTCTATTTGCATTTTCTCACCCTGTGCTCATGTCGTATTCTCTAAGCTGCATATATTACAGAGAAGACATTAAGAAGCTCTTATTTAGGCTTTCGGTCGATCTTAAAGGGCGTTACAATGATCTAGAAATTGAGAAGGAGATGATAAGAAAAGCTAAACTGTACTCAGTCTTATAT…
>PbraOR15
ATGGAAAGACTTCCGGACGAAGTGTCAAAACCACTTTTTCTAAGTATTGATGTCTTAAGCCGGTCTAATTTTCAAATATGGAATCATTATTCCACTTGGAAAAAAATACATATTTTTTACATGATACCATGTGTTATAGTTTTCTTTATAGGCAACGCTCTGTATACAATTAACATGTTTTCGAGGGATGTTTCACTATCGGAGGTTGCGTACCAGATTTCGATTTTCTTGATTATTATACAAGCTACAGTCAAAGGAATACTACTCATACCGAAAAAAAAGAAAATCGCTGAACTTATTGAGAAACTGGGCGCAACTTGGACTAAAGGCAATCTAAACGAACAACAAATCCGCAGTAAGAAATTTATATTCAAACGAATGGATTTTTGCCTTAAAATA…
>PbraOR16
ATGTCGAAGTTAGATCAACTTCCGAAGAATTTTGTCAAAACTTTTTATCGTCACATAAAGTATGTTAACTTTTTGGGAATCGATATTTTCGACGATTCGAAGGCGAATAATTATAAAAGACAGTGTCAACTAGCAATTCTTTACAGTGCACTGCTATCGACAGTTTGTGGGCAGTTTTTATATTTATTTTTGAGCCATAGAACAAATGCTAACTTTTTGGACATTATTAACGCTTTACCTGCAACTCTTATGGCAACACAAGATATTGTTAAATTATGTATACTAACGATTAAGAGAAATGAAGTAAGAAAAGTCATTCTGGCGTTATCGGAGTTGTGGCCCGTTGACTTTAATTCAAAGAAGATGAACACAGTTTGTATTTGGACAAGGCGTCTATCA…
>PbraOR17
ATGGCTTTAAAGAGGAAAATTGCTTTCCCAGTTACTGAAAAGGATTACTTAAAATTAATTTGCAATGTCATACACCGCTTGGGTTTAGCAGACTGTTGGTATGAAAAACAAGAAATAAGATATCCAATATTAAACAAAGCACTCTTCCTCATCGTAAATATATTTTGGGTTATTTTCACGGTCAATGTTTTGGCAGCAAATTGCAGAACAGATTTAACGTTAAAAGAAAGTAATGATGTGCTTTTATTTAGTTATGGTTTGCCAGCAATAATTCTCAAAGTTATAATACTTTATGCGAAAAAAGAAGAAATTAAGGTATTTTTCAAGAAACTTCTAGAGGGGGAGGTAACACAAAAGTCGAATAAGAAAGCTATAAGAGCTGCAAAAGTTATTTACGTG…
>PbraOR18
ATGGACACGCTTCGTAAATTCAATTTAAATTACTGCGATTTATCTTCAATGCTCGAAAATCTCGACATTTTGTTAAGAATCTCCAACGTTAAAATTAACAAGAACAATGATCGCCCTATCAACATAATAATTCGGCTTATATGGGTAATGAGCATAATATGCTATTATTATGCGTATGTGTTTTCGATGTTTTGGTTCGTACTGGTCCAGTATCCTCAAACAGAGGATTTTATAACAGCCTGTGTCATGTTCTCTCTTTTAGTATGCAGTCAGCCCTCATTTGTGACCATGTTTTATATAATTATTTATAAGAAAAGAGTGCAAAATCTGATCCATAGCTGCCTACAATTCAACTATCTAGTAAAACCTGGAACAATATTTTCGAAAAACCTATACAGT…
>PbraOR19
ATGCCGTCTCTACGACCAAGAGATGAGGTCCTTTCGGAACTAAATTTTATCCGATATCTCACTACTAAAATATTCCTTTACCCTTTTATAGGACGATCAAAGCTGGCCATGATTGGGTACGTACTTACCACATTTCTAGTTTTATCTACAACTTTACAACTTTTAATAACTATTGTATCAGCAAATACGTCCGAATGGCTCGCCATTATCAATGCCGCTCCAAATCTAGGTGTCTGTGTAATGTCCGCAATAAAATACACAAACATACAAATGCATACAGTACGTTATAACCAGATATTTTTACATTTCCATGATGAAATGTGGGACGTTGTTACAAATTCTGATATACATAGAAAGATAATAAGGTACTACAAAAAACTTGCTATGGTCTTTAATCGA…
>PbraOR2
ATGGAACGATTACCGGAGGACGTGATAAAGCCATTACGTTTAAGTATTGACATCTTAGGACGATCCAATATATATATATGGAATAACGATTCCATGAGGAATAAAATACGTGTCGTATACATGATGGTTTTATTTATCGTTTTCTTTATAAGTGTTGCTTTGTATACCATTCAAATATTTTCGGAGGAAGTTCCAATTTCGGAGGTAGCCTTTCAAATTTCGACATTTTTATTTTTAATTCAAGCCACATGTAAAGCAATACTAATTCTACGGAACAGAACAAATATTGTTACACTTATAGAAAAAATAGGCGATACTTGGAGAATATACAATATAAATGAACAGCAAATTCGAAACAAGGAATTTCTATTCCAAAGATTAAATTTCTGCCTGAAAGTT…
>PbraOR20
ATGACTAACATTTTCAAAAAAACAATTTCCAAATACATACAGACAGTTGGCCCCAGAAATGAAGTCGACGATATTTTCCTCCCAGCTTTGGCGTACCAAAGCATTTTCGGACAGCAAGTATTGGACCCAAGATGGTCTTGGAGAAAGCATTATATCCATCAACTATTAAATTTATTCCTTTTCATTTACGTTTTTCTTGGGACCTTGGAATGCCTAAAAACAAGTGACGATAAAGATCTGCAAGCAGAGGCATACTACACCATTATCATGATAATAATATTCCCGGTCAAAATGGCATTGTTCATAAAAAGTAGATTCACATTCCGCACTCTCTACGCAACTGTAAAGAACATTCTTATAGACGTAATACGAAGAAACCCCACTGCGGATATCAAAAGG…
>PbraOR23
ATGGAACAAAGCAAAACTTCAGAGTTTGTTGAAAAAGTAACCAAATTACAATATATGTTGGGTTTACCTTACGTATGGGTGGACGATAAAAAGCCAAAATATTTTCAACACTTCAATAAATTTTTTACTTTTGTCGCAATTTCTTTCGTAATTTCTGACTATGTGTCGTTTTTCACCCAAAATCACTTGACTGAGAAGCAGACAACTGACCGAACCTTATTCACGCTTAGCCACACAATTCTTATTTTGTACTGTTTTGTTTTCGAATATTATAAGGAAGATATTAAAATATTATACAAAGTGGCCGTCAGCTTGAAGACGCATCACAACGATTTAGCTATTGAAAAGAAAATGATAAGAAAAGCTAAAATTTACTTGGCATCTTTTGGTTCAATCCTC…
>PbraOR24
ATGTTTAAAAAATTACGGAAGTTCGGTTTAGGCCACTGTGATTTTCAGAGTATGATAAGCAATGTTTCGATACTTCTGAGATTATTTGTCATTAATATTGATAAACGAAATACTAAAAGAATTCCCCTTATATCATTCGTGGTGACTATACTAATTTCATTGGGTTACTTCTATACTTATCTGATTTCTGCTGTATGGTATGTGTTCTGGCGTTGTCAGGAAACTGGAGACAAAATTTCCGCCTTGATCGTATTTTCCCTTGGTGTTGCCAGTGAGATTTCCGCTTTCAAATTGTTGTTCATGTATATTTACAGTGACTCTATAAGGAACATCGTGGAAGGCTATCTTAATTTAGACGCTAAAACCTGTACTGAAATCCGTTTAGCTATAAGCCTAGAA…
>PbraOR25
ATGAATAGAGGTGAATTCAACCGTGTTTTACGGCATCTTCTGTCGTATAGTATAAATAAATGTGATCTTAATACGATGGTAGGAAATGTTAATTTCTTTTTGAGAGCGTTGACTGTTAATATTGATAACAGAAATACTAAACCGATATCTGTTACATTCTATATCCTAACAATAATTGGTCTAATCTGTTATTACTACGTGTATGTGGTATCTGTGGTTTGGTATGTGTTCGTCCATTATCCGGCGACGGGCGATTTTATCGGCACAGTTATAATTTTCTCAATAGGAGCCTTCACTGAAACTTGTCCTATTAAACTATTATTTATGATTATGCACCGAAAATTAATAGCAAATGTCGTAGAACGGTATCTTCGGTGTGATGCCCAAATTGACCTTGGA…
>PbraOR26
ATGGAGAAATTTCGTCAATTTAATTTAAACTATTGCGATTTAAATACAATGCTGGAAAATCTGGATTTTCTTTTAAGAATCTCTAACGTTAAAATTAATAAGAACAACGATCAACCTATACCCAAAATATTTATAATAATATGGTTTGTGGGCATTATTTGCTACTACTACGCGTATGCTGTCTCATTGGTTTGGTTTGTCGTGGTAAAGTATCCGGCGACAGGGGATTTTAACACTCCATGCATATTGTTCTCAATATTGGCGTGTAGCCATCTCTCATTCGTCACCATGTTTCATATCATGATTTATAAGGAAAAACTTCAAAACCTCATTCAAAGCTGTTTAGACTTCAACAAAATAGTGAAGCCTGGGACAGTATTTTCGAAAAACCTTCACATT…
>PbraOR27
ATGGAAGCAATACGTAGATTTCGTTTAGACTTTTGCGATTTGTCAACTATGATTGAAAATGTTGATGTCTTATTGCGGATTGTTAATGTTAAAATTGTTAAAGCCAATGACAGACCAATCAACATGATAATACTATTAATATGGGTGACTTCCCTTATATGCTACTATTACGCCTATATCGTCTCGACAATATGGTTCGTGTTTATTCGATGTCCAGAAACAGGGGACTTGATAGCCGCATCAATAATATTCTCTTTGGCTGCGTGTAGTCAGCCATCGTTCATCACCATGTTTCAAATGATTATTTACAAAAAAAAGGTCCAAGAATTAATAGAAAATCTTCAAGGAATTAATTACTTAGTAAAGCCGGATACAACCTTTTCCAAAAACCTTCAAACG…
>PbraOR28
ATGAATGTTAAAAGAACATTTTTATCATTTTGGGAGTCGTTTCGCAAGTACGGCCTTAGACATTGCGAGCTTGAAGAAATGCTGACAAATGTGAGTCTTCTATTGAGAACTGTCACTCTCAACATTGACATCAGGAATAAGAAACCGATACCACTTATCACTTACGTGTTTACAATATTGGGGTTTCTTTGCTACTACTACATCTACTTCTTTTCAATGATCTGGTGTGCGTTTGTCCGCTACCGTCATTCTGGATACTTCCTGGGCTCAGTCATCGTCTTCTCCGTTGGAGCATACACTGAATCCTGTGGCATTCGCCTGCTGTTTATGGTGATAAATAGCAAAGTGTTAAGAGAAGTTGTAGAGAGATATCGAGTCTGCAGCACTGAAGTGGAACCT…
>PbraOR29
ATGAGCGACTTAAATTTGGTTTTTGATAAAGAATTTAAAATCACTACAATGGCAATGAGATTCAATAGATCCTGGCCGCATGGAAAACGTAGTATGTTGTGTAAAATTCAAGTTTTTCTTTCGTATTTCGTCAGCATTGTAACCTTGTTTTTTCTTCTTTACTCTATGGTTTTGCACGATTTTCCGGACGAAGTCTATGGTGAAGTGGTCAAGAACGGGATAATTGTAATAGTTTCCACCTCTGTTGTAATCAAGTTTTTTATTCTAATACATCACCGAGAATCTCTTGTAAATTTAATTAAAATCGTACAGAACGATTATGAGGAAGCGGAGCAATTTAACAACGACGATAAAACTATCATTTTGGACTACGCTCAAAAGGGGAACGATATTTGCAAA…
>PbraOR3
ATGGCTGTGCAATATTATTTGCAGCCACCACGCGAACAGATTTTTTACAAAGTTCTTGTTGTTTTGGCAAATTTGACAGCATTAGGGAACAAGAGCTGGTGGGGTTACACAGTACCTAATATTTATTATCGCTTAAATAATTTGATTATCATAACATTCGCACCGTCACTGCTCATATCTCAACTGATATACTTATATGTGAATTTCAATGATTTATCATTCGATACATTGGGCATAATTTTTTCTATAATTCCCGTAACGTGTTTGGCTAATGTCAATGTTTATTCAGCGAAATTGTCATATTACAAAAAGATCATGAAAGATTTCATGTGTAAAATTCATCTTAACAACGGGAGAACTGAAAGCGCATTTACCAAAAAGAAAATCCTCATAATAGAA…
>PbraOR30
ATGAATACTTGTGACGAATTACGCTTCGAGAAAATATTTCAAACCATGTTAAAAGCAATGAGGTTAAACAAAACTCATCCAAACATACCACGAGACAAGAAATGGTTCTTAAAATTCATTATTATGTATGGAATATTCATGCTTGGTATCAGTTTCGCTGCTTATAGTACATTTTTCCACGATTTGAAGGATGGAAACTTCAGTCAGGCTTGTTATCATGGAGTCTTAATTGTAATATTTACTGTCGTCTCCTTATATCACATTGTCATGAGGTGGCATCGATTTCGGTTTCAAGATTTAATAAATCAAATGAAAGAAGACTACGATGTGGCCAAACACTTTGCAGTTGAAGACTACAATGTCGTATTAGATTATGCTAAAAGAGGTAAAATGATTATG…
>PbraOR32
ATGGACAGCAGATTTAAATCATTTAATGAAACGTTCACGCGTTGTGCCTTCGCTTTGGCATTCGCCCTCATCTATCCCAACTCCCGTAACCTTAAAAAGAGAGTATATTACTTCATCGTCGTTATTTTTATTAACTCTCTCATATTGTACTGGTTTTTAATTTATTTATTTAGGTGCCTTTTTACTCTCGACATGATAAATTTCGCGAATAACATCACTATCGGCGTCCTTGCTACTCTTTTCTTCTTCAAAACACCTTACTGCTTATATAAAACGGGTATCTTTGCTAAAGTTTTAGATAAAATTTCCTACGATATGCTCAAAGGTAACGATATGGATGAGGAATACCAGGAAATATATGAACATTATATAAAAATTGGGAAGCTCGGTCAAACTTGT…
>PbraOR33
ATGATGTATCCTAATCCACGAAAAGACTCTAAAAGAACAATCGGGTTTGGTGTGATCGGAGTTCTCTGTGCCCCACAACTCTTTATAATGTTATGCGATATCAGAGAGCGAATACAAATCAACGACACAGATAATCTTTTTCGTCAGCTTATCATCACCGTGCTGCTTGTTTACGTCTATATTAAGATATTTCTAACGATAAATCAAAATAAGAAATTCCGAGCAATACTAGATAAAGTGTCCACAGATTACGAAAGTTACAACCACCTTCCTGAAGACTACCTCGTTATTGTCACAGAGACAATAGAGAAATGCAAAAAATTGGAAATTATCTGGACTTTAATGGTGATATGTACTGGTTTAGCTTTTATCCTGCAGGCGTCAGTATTAACTCTCCTT…
>PbraOR34
ATGTTGAAGCTACACCTATTGATCGACAAAGAAGATTTTTTTTACTTTAATGAAAAATATCTTTACTATGTTGGACTATGGCCAAATCGACAGTCTACGGTGTATAAAATTTACGAAATTACGTTACATATCTTAGCAATAATTTACGTTATAATCACCGGAATCGGTACCTTTCAATTCAAACACGATACACTTGTACTGATGGCAAATTTGGATAAAACACTTGTCGCATACAATTTCGGACTGAAAATATTCTTCTTTGTCATAAAAAGATCACAGTTACAAAAATTAATTAACGAAATTAAATACTCCGGTGATAAAGTGAGCGAAGAGAGAGTGAAGTTCATGTCTGCACATATCATTTTCATAACTATTCTGTCTACTATAATTGTGTCGATA…
>PbraOR35
ATGTTCGAAAATCGAGCTCTGAACGAAATTTATAATACTATGAAGTTATGTGATTATTGCACTAGAAAAATAGGTTTAACATTCAAAGGTACAACTAATGAATTATTTCGAAAATTGTGGACTAATTTATGGTTATTTATTTCTGGTCTCATTTTATTTCTGATGGTCGCTGGCGAGATCAATTACGTCATCAATAAGCTAGTTACGTCATCGTCAGTGGTGGAATTTGTATCAGGTTTGCATATCGCTGGTTATGATACGATGAGTTTTGGCAAATTGTTGACGCTCTGGTATAAAAAAGACACTTTTAAACACCTTTTGATTGAGCTGGCGGATATCTGGCCGATGTCCGAACGCGATAAGGAGGCCGTCGAGATTAAACGAAAAAAGCTTTCGCGA…
>PbraOR36
ATGCTGAAAGTAAAAAGGTTTTATAACAAGGAAAATTTCGACTTTTCTACCGGCTACGTCGATCCCTTTGAATTTCACAAAACTTGCTACATGTTTCTTAAAGCTTTTCAAGTTTGGGATGGGGCAATACCTAAATGGACATATTTGCTGAAAGCGTTAATACTTTTCTGCGGTCTGAGTGCAATAACCCTATTAAAATTTGGGGTTTACCATGGACTTGATACCCGCGATCTCCCATATATGACAGAGGCGGGAACTTATTTTCTGATTATGATTTACAAGCTTTTGATTATGTCATGCACTGTTTTCAATTTGCCAGACTATCACAATTTATTACAAATTGTCAGGGAAGATTTTCAATATGTGTGTGACAAAGGGAAGATATACAGGGAAAGATTT…
>PbraOR37
ATGGATGAAACTTTCCAAGTCTTCGATCGTATTCTCTCTTTCGCGGGAATTTCGATTTTCGCAAAACCAAACTGGAATTCTAAAAGATGGCTGATAATCCAGACTTTTAACTTTCTTTTAGGTTTTTTAACATTTATTTTTACATCGGTTTTTGTGATATCGAATCTATCTGACTTGCTGGTATGTATTCAAGGGGCTTGCGTTTGGACAACCGGAGTTATAATGTTTATCTCTTTTGGTATTTGTTTGATATTTAAAAAGGATTTTGAGGCTTTCGTTGAAGAAATGGCATTTTGTGATCGAGCTTTAGACATACCACTTGTAAATTCAGTTATATCTTTAGCTACTACGACGGGTAAACTCCACGAGTTGAAAAACCTAGTACTTACTTCGCAAATA…
>PbraOR38
ATGTCGTCCAACACAATTGGCATGCCGGGATTCGAAGAAATTTTCAATCAAATTCAAATTAATTTTTGGTTCATCGGTATACCATTCGAGGAAAATGTAAAATTACGGTTTTATATTATGTGGTCTTGGCTTTTCGTAATGATCACCCAAGAAAGCTTATACTTCATATCGAAGTTTTCTAACGAAAATTTCCTGGACTTAACTCAACTCACTCCGTGTACTTGCATTGGTATATTGTCGATTATAAAAATTATATTAATCGCTAGAAAAAGACTTAACGTCTTCAAATTGACGAGTAGCCTGAGAATATTGTACGAAGACATTATACGAGATGATAAAAAGGTGTCGCTTGTCAAAGCAAATTTCGTATTTCTCAAATACTTGACAAAGTATTTCTTT…
>PbraOR39
ATGATCCAAAGTTTAGGTAAAGATTCGTTTGATAGGTCTTTAATTTTGATCAAAATCTCCCTCTGGCTCGCTGGTGTAAATGTGTTTCATAACAATGAAAAGATTTTGCCTAAACAAATTTCGTACCTATTTTATGTTAATATCTTCTGGCTGTATTCAGCTGTGAGCGGTCAATTCCACTGTATCTACGCATATATTCAAGAAGGAAAAAGTTTTGAAGAAATATCGTTAGTTGCTCCCTTTCCGCTAATTTGCGGCTTGAGTACTATCAAAGCTGCCTCCATTTATATCAACAAACATGCAACTGTCAAGGTTCTTAAAAAGTTACGAGAACTACATCCTGAGATTTTGACAATTGACGAGAAATATTTTAAGAATAATAAAGTACAAAGCGACATA…
>PbraOR4
ATGGTTATAAACATCCCAGAATATTATAGAAAATATAAGAGTTTCCCTGAAACTTATAAATTTACCACATTTTCGATGACAACCTCTTTCGTTTACCCAAATTCCAAATATATTAAACACCGTTTATTTGGTTTTGGATTAATCACATTAACAACGCTACCTTTGGTAATATTCATCAATATAGATCTCGTTAGATATGCCATGGATGGTAACATAGTAGAATTTATTCAGCAAACTAACCTACTCGGACCGTTTCTCGCCATTCTTTTTAAGATGCTGATTCAATGTTACTGCAACCAGCATGGCTTTGCATTAATAAACGAAATCAACCGCGACTACGCTCTGTATAATGACATGTCTGCCCCGTATCAGGCGATCGCGGACGAAAGCATCAAAAAC…
>PbraOR40
ATGGTCGAGTTTGAAAATTCATTCAAATTAACCAAAATATCATTATTCATATCAGGTGTTAATCTGTCAATAAAAACGTCGATTCCCTTAAATTTTCTCTTTATTTTCAATTTACTATGGCTGTTTACTGATGTGTTTGGTGAATTTTATTGGGTGATCGAAGGAATAAGAGCTGGTAAGAGCTTTGAAGAACTGTCAGTGATTGTGCCGTGCACTGTCATTTGTTTTTTGGCCGCCTTTAGATGTGTTCCATTGTATCTTAATAACAAGCATCTAGCTAATATTTTCGACAAACTTCGAGAGATTCATCCTAAAGCAGAGGACAAAGAAAATATGATTGAAAAAGAAGAGAACGAAATAACAGAACGTGCTATTAAGCTGTTTTATAATATTGTTATT…
>PbraOR41
ATGGAAACAAATCGGGCCCTTAAAGAACTCGATAAGATTTTTTCGTTATTAGGCCTTTCCTATGATAGGTCATCTAAAAAAGACCGTATAAAACGGCGTTGCATCTATATATTTAACTTTATCTGGCACAATTCTGATGTTTTCGGCGCGCTCGTCTGGTTTTTTGTTGCTTTGCAAAAGGGAGCATCGTTCATAGATCTAACGTATATAGCTCCATGTATTGCGTTCAGTTTTCTAGCAAGTTTTCGAATATATTCTGTAATAAGCAATGAGGAGAAGGTCTACGAACTAATAACAACACTAAGAGAGTTGGAACACCGAGCTATGTCCGACACGGAAATAACAGAAATCTTTAGAGAGGACACGAAATTCTTGCATAAAGTATTGAAGATGTCTAAA…
>PbraOR43
ATGAAAATCCTTCCGCAACCTTCTGGAAGAAAATTGTCTATCATAAAGCCGTATCTGCCTTACGGCGTTTTAGAAGCCTGGGACGATCTTAACCCGCATCTCTACCATGCTATACACATCTACTGGCTTAAATTTTATGGAATGTGGTATAACAAGTACTCGCCAAATTGTTTGTATTTCTGGTTGCAGATAATTTATACCGTAATTGTACTGTGGCTTGTTTGTTTTCTGCCTGCGATTGGAGAAATCGAATATTTACTGAAACGGCAGGATAATGTTGGAGAAATCGCTGAAGGGCTTTATTTATTTCTAAGCGAAATGTACACATATTTCAAAGTGGCGGTGTTTTGGTTGAATAAGAGGAAAATTTTGAGACTGCTTAAATATTTGCATTGCAAG…
>PbraOR44
ATGGGTGACATGATACATTGTTTTCAAATTAATGAAATTTTTTGGAATATGTTAGGCATACATCCGAAATCTAAAAATACATATCATTTTATATATTCCACTGCGTTTGTCATTTTCTTTATAATTATATACGACTTTTTATTTTCAATCAATTTCATTTTCATGCCAAATCAGCTAGATTTGTTTATTGAAGAACTTATTTTGTATTTTACAACAGTTGGTGTTGTGTCGAAAGTCTTAACGTTCGTTTTTATGAGAGAAAAAATTACCCAATTACTCAGTATATTGAAAAGTGACTTATTTCAACCAGAGAACGAGAAAGAACGCCACATTTTATATAAAGCGAATAAATTTATTATCACCTATTGGAGAATAGTTGCTGTGGTATCCTTTACATCG…
>PbraOR45a
ATGGCTACCATATCCGAAAGTTTCAATATAAATTTTATCTGCCTAAGAATTTTTGGTGTAATATGGCCGGGCAAAAGCTTAAGTATATACTATATATTATATTCAGGCTTTTACATGTTCACAACATTAATAGTCTATTACATACTGCTAATATTAAACCTGTTCTATACGCCCAGGAATATCGAATTGTTGATACGCGAAATATTATTCTGTTTTGCCGAAACATTGGCATTCTCGAAGGCTGTCATGATTTTTCTTAACCAAAAACCTTTAGTGAGAGCTTTTCATGTTCTCGACTGTGAACATTTCAAAGGCGAAGACGATACAAGCAGAAAAATTCTAAGTCAATATATCGCCAAGTATAAAACATATTGGAAATTAGTCGCTGTTTTGTCTCAT…
>PbraOR45b
ATGGCTAACATATCTGATACTTTTAATATCAATTTTATATGCTTAAAATTTTTTGGTGTTCCATGGCCGGGTAAAACTTCTAGCATATACTATAAATACTACTCAGGCATATATATATTGGTATCATTGATATTATATTACTTGCTTATCATCTTAAACCTGTTCTATACGCCTAGAAATATTGAATTATTGGTTCGTGAAGTGTTATTCTGTTTTTCTGAAACAGTAGCAGCTGCGAAGGTGGTAATGATTTTTCTAAAGCGAAAAGCTATAGTGAGAGCTTTTCGTATCCTTAACTGTAAAGTCTTCAAAGGCGACGACAAAAGCCAACAGTTAGTATACAAATATATAGTGAAGTATAAAACATATTGGAAGTTTAATGCGGTCATGTCAAACAGT…
>PbraOR46
ATGGAAATTAAATTATCATACAAAAGCGTGGAGGCGCACTTCTTAAATTTGCGTTTGGCTGGCTATTATCAAATTGATTTGCGGTCGGGGACGATCTATAGATCATTACATAGGTTTTACATGGGTTTTGTGCTTTCGTTGATATTAGTTTATACGATGCAGCAGGCTTTGAAGGTTTATGAGGTCAGGGAGAATCTAGGGGATGTGATGGGGACAATGTTCTTATTTTTAACTCACACTGATGCTATTTACAAACAAATTCTATTATGGGCTCTACAAAATGACGTCGAAGATCTTCTAGACACCATGAAAGGTCCTTCATATAATCAAGGGAAAAAGGAGCATAATTATTACTTACTAAAAACGATCCGTTTTGCAAAATTACTGCTATTCTCCAAC…
>PbraOR47
ATGAGTGTCACCAAACCGATAGATCAAGCAAAAAGTTATGTTCATTTTATGTTGCTGTCATTAAAGATTGTTGGATGTTGGGAATGGTATCCACACGCCGTAAATAAACAAATTTACGTAAACAATATTTATATCTGCATGGTTTTATTTATTTTGACTAATCTACCTTTATCATTGGTTGTACATTTGTACACCGAATGGACGGATATAATGTCAAATTTGGACAAAATGGCGGACGGGTTGCCTCTTTTTGTATCTGTGGCGATTGTGGCGTATTTTGCAATTTATAAAAAAGAGTTGTATGAATTAATCGAGTTTATGAATGTTAATTTTAAATGGTATTCAGCGAATGGACTCACCAATATGACGATGGAAGGCTGCTATAAAACTGCGAGGAAT…
>PbraOR48
ATGAAGTTCTTCATTGGCCACACATACTACGGTCTAAAGTTCTCACTCAATGTATTGCAATTATCCGGGTTTTACCAGCCTGATACGTTATCGGGGTTCCGGATGACACTATACGCTTTATACTGCATTACGTTTTATGTGTTTATTATTGGTACATATATCGTGGTCCAAGCCGGAGAAGTCGTTCAAGTCTGGGGTGACATTCCGCTTATGACGGCCGCGCTTTTTCTTTTGTTTACTAACTTTTCGCTCTCTTTTAAAATATTCAACGTAGTATTGAAAAGGGAGACAATCAGAACAATAGTTAATGACTGTGAACAAGAATTAATTAGTGAGAAAAGAGAGAGTGGAAGGAAGATAATTGCAAGATTTAATCGTCAGGCGAGGCTTCAATTGTTC…
>PbraOR49
ATGAGGTTTTTCATTAATAATACTAACTATTCCCTTCGGGTATCGCTCACTTGGCTTAAGATTATGGGGTTATGGGCTCCAGATACTTTAGGATGGAAAAAAATGTTATATTCTTGGCATACAGGCTTTGTGTATATGCTAGTTGTAGGCACATTCATCATAATCCAAGCTACTGATTTATTCATTATCTGGGGAGATATACAACTCATGACGGCGAGTGCGTTTGTTCTGTTAACAAACCTCACCCACAGCTTAAAGATTCTCAATATGGTTGTAAGAGCTGATCGTATCAAGAGCATCGTTAAAAAAAATTATAACGTATTGAAAATTCAAGTTACTGTTGAAGCCAAGAAAGCCGTAAAAAAATGTAACCGCGAAGTCAATATACAATCAATGTTA…
>PbraOR5
ATGGATGGAACTATAACTTACTTCGACAGAGTACTTTCTTATGCAGGCATAAGGATTTTTTCTAAGCCTAATCGGAATTCAAAATCATGGCGCTTTTATATGATGTTCAATATAATGATCAGCATATCGGCCATTTCATTCACAGCTAACTATTTCATACAACATTTCTGGAATTTCTCTAAAAGCATGCAAGCTGCGTGTCTATCTTTGACGTTTTCAATTCTATTCCTTAACTTATGTAATTATTTCTACTTTAAAAAAGAGTTAGAGGAGTACATAGATGAAATGGTATTCAATAATCCCGGCTTAAATATGCACATTATTAGCCAGGTTTTGAAAATTGATGTATTTGGTAAAAAATATGACTTAAAATTATTTATTATAAACTCTGAGAAGAAA…
>PbraOR50
ATGGCTGTAGTTGTTGCTAATACAAATTTTTCGTTACGTTTTTCTTTGACATGTTTGAAAGTGTTTGGGTTGTGGCCCGCCGTAGGAATTGCGGGATGGAAGAAAATTCTTTTCTATACATATTCTTTATTTATCTTTATGTTGATTTTGGGCACATACATAGTGATCCAGCTGGTAGACCTGTGGCAGAACTGGGGGAATCTGTCATTGATGACGTCAATCGCCTTTGTGTTGTGCACTAATCTCGTGCACTGTGTGAAGATCTTCAACCTGCTGGTGAGGAGGCGTTGTATAGGACATATCATCGACCGAAATGATTATGTCCTAAAAAATGCTACTGGACAGCAGAAGATCGACATCATTCGAACTTGCAATCAGGGAACAACTCGTCACCTGATG…
>PbraOR51
ATGGCAAAACTTACAAATTTATTTATAAACAGAGCCCAGCACGTTATGAAATATCTAGGCGTTTGGGTTCCAGATGAAAGCGACACGATTTATCGAAAGTTATATAAAATATTTATGCTTTCTTTGCAATACACGTTCTTATTATTTCAAATGATTTTTGTGGTCCAGACGTGGGGTGATTGGGAGGCAGTAGCTGATGCTGTTTACGTACTGTTCACTCAAGCTAGTTTATGCTGTAAAATTGGAGTTTTTCATATAAATTATGAAGGCGTAAGAGAATTATGTCAACAAATGAACAACGAAGTGTTTCGGCCTACGTGCGTCGTACACGAACGAATACTTCAAATACGAGCAAATAATATAAAGCGACTGCTGCTGTGTTTTATTGGAGCGGCACAG…
>PbraOR52
ATGATAACTAACACTGATATGTTCTTAGGTCGGCCACGATTTATTTTACATTATCTGGGGATCTGGCTACCACCCGAAGAATATAAACTTCTGCGCAACATTTACAAGTTCCTTGTTATGTTTACTCAGTTTTCTTTTATTTTCTTGGAATTTATATATATAGCTGTCGTGTGGGGTAATATAGATAAAGTTTCTGAAGCTTCGTACTTACTCTTCACCCAGGCGTCGGTTTGTTATAAAACAACGGTTTTTATGATGAATAAAAATAATTTAAAAAAGCTTATCAAATTCATGGAAGTGGGAATATTTGCACCGCAGACTATAGGACATGAAAAAATATTGGCCGCACAAGCTAGAAAAATACGCAATCTTAGTGCAGTATTCTTGACGAGTGCCATC…
>PbraOR53
ATGCAGTCCTGCGTTTTGTTTTGGTGGGGTCTTAGAAATGTGATTTTTAATGCCGAACAATTAAAATTAACAATTTATATAGGTTATTTTGCCACTAAATTATCTGAAATACTTTTTACATCTTGTCAAAAAGCCTATTGTGATCAATTCAGGTCCAGTGCAGGCGAGTGCGTGGCTATACACACGCGAGTGTTGCGATTTGTAGGCTTCTTGCGCGGGTACGGCTCGGCTCACGCCCTATATCGACGCGGCGTGTTAGCGATAACAACATTGTACCTAGTACAAGAATGCGTCTACGCTTACAAAGTACGCAGCAATTTGGATAAACTATCACGCGTCATGTTCTTGCTCCTCTGTCACGTGACGTCACTCGCTAAGCAGCTGGTGTTCCACTTTGAT…
>PbraOR54
ATGGGGCTCATCCATCGGGTCTGGATAAAATTAACTCCAACAACCGCGGTGCAGGACTGCGGGAGTGAAGAAATAATGTACTTTGAATATTTGTATCGCGTCATTTATCTCGCAGGTTTATCATTTTCCCCTGAGAATCAAAAGTACTACATATACAGTAATGCAGTGAAGGCTGCTTTGATACTTTTATTTATGAGTGAATTATGGCAGTTTTTGAGTAGGCAGTGGACGTTAGACACAATCACTGATAGCTTTAATATACTAATGATTCAACTTGGCGCTGTCTGCAAATATAGGAAAAAGTTAGCCTACGAGAACGTGTTCAAAAGACTAGCTTCGTCCATGAGTTCGCCGAACTTTGATTTATCGACGGATGAAAGGAAAAAGTTGCTGGAAGTT…
>PbraOR55
ATGAAAAGCTTCGATAATCTTTGGCAAAAGCTCACTCATACAAACGCTCTAGAGTTGTCCAGTGGACGATTTGAAACGTTTTACTTTGAGTCTGTCTATCGTGTCACGTATTTAGCAGGTTTATCATTCTTTCATGAAAAACCATTATACTCCATATACAGTACAACAGTTAAACTATTTTTGTTTCTGTTATGCGTGAGTGAATTATGGCATTTCCTGACATCGCAATGGACTATAGACACTATTATTGATAGTGTCAACATCACTATTATTCAACTAAGTGCATTTTATAAGTATACTAAGAAGTTGGCTAACGAGAGTGTGTTTAGACGGCTAGCGTCGACCATGAATTCTCCAAACTTCGATTTATCAACTGATGAAAGAAAGAAAATATTCGAA…
>PbraOR56
ATGGACGGACCTCGCCGTTACTTTGCAATTCATTTCCTTTTACTGCGTTTCCTAGGATTAGGTTACTGGCACCATCCTGACGAGGGGGATACCAGGAATTTTCCTGGAGTATACCTTTATTATGCCATACTCACAGAACTGGTTTGGGTCGCTGGTTTCGTCGGTCTGGAGACGGTTGACCCTTTCGTTGGAGAGAAAGATCTCGACCGCTTCATGTTCAGCCTTTCATTTGTCATAACTCATAATTTAACACTCATAAAGCTCTATATATTTTTCTTTAAGAACAAGGATATACAGGAAATCGTGCACATTTTGGAAATCGACTTGCAAATGTTCTATCAGAACAACGAACGAAATAGACGAACAGTTAAGGTAACGCGAATATTGACTGGTGCATTT…
>PbraOR57
ATGTCTAATAATACAAAATTTATATTACGAACATTCTGTAAGTTTGTCTTTATCTCTGGTTCTGGAAATTTTTACTATGATCAGAAAATATATAAAGAAACGTTTTTTTACAAAATGTATAGCATAGTTTCCTATTCGATTTATATAACGATGATTCTATTGGAAAATTGCGCTGCAATATTTGGTAAATTTCCCGAAGTGGAAAAGAATTCAGCCGTTATGTTCGCGGCTATTCATAACATCGTACTGGCTAAAATGTTCCTCCTGTTATATCACAAGAATTCTATAAGGAAATTGAACTATGAAATGACAACGGTGATGGAAAATATCGAGGAAGAATACGTTATGAGGGAGCAATATAGAAAAGTCAAATTTGGTATTGCGTTCTACGTCGCCAGT…
>PbraOR58
ATGAAGAATTATTACATATTGAAAACATTTTGTAAGAGAATTTTCCTCGTCGGCACGGGGAATTTTTGGTACGAAAACGGCGAGATAGGAGATGATTCTAGTATATATTACAGAACACTCTCTTCGATTTTATTTTTTGCCTATTGTTTTATGACTTTACTGGAAATAATGGCAGCTTTTATGGGTGACTTTCCGGAAGATGAGAGACGTGATTCGATTACACTTTCTGTGAGTCACTCGATACTATTGATAAAGATATTCTCGATAATTTACAATAAAATAATCATCAAACAGCACATGTATGATATAGTACGTGTTTGTGAACGGTACGAGAAGGAATCATTGCTAAAGGAGAGATATCGATTTCTGAAGATGAACGTTTTGGCGTATTGTATTACT…
>PbraOR59
ATGTTTAATCCAATGGAAAAATACGGCTATACGGCGAACATTAAAAGAAATCATGAACTATCAGAAGACTATATAAGATATTTGACGCAAAACCGACGTACAACTATGGAGGTAACAATCAAACATTGGGTCAAGAGGACGGGATTGTGGTTTGGTCCGCTGGGAGATAGTACGAACTGGTTTGCAAAGATTTGTATTATTTGCTTCTTTATGACAAATGCGGCTCAATTTGTTTCTTTGATTATAAACAGAAATGATCCAGCACATCTCTTTAGATGCTTCAGCGTCCTTTCTTTTTGTGGAATGGGTTTTATTAAGCTGACATCGCTACAGTTAAGCAGGAAATCTTGGCGTTTTCTCTACAACAAAATGTATATTATGGAAAACGAACAATTGAAC…
>PbraOR6
ATGTTAAGAAATCTGCTTAAAAAGCTGGAAAACCCAGAGAGGCCGTTGCTTGGCCCAAATTACAAAGCTCTGACATTTTGGGGCTTATTACTACCCGAAAATGTTTATAAAAAAATATTTTACCTAACCATGCATTTGTTAGTAACAGTATTTACCGCTACCGAATATATCGATATTTGGTTTGTTAAAAACGATATAAATTTACTGTTAAATAATGTTAAAATAACGTTTTTAGCGACCGTTAGTGTTGCTAAAATAACGACGTTTTTGGCATGGCAGAAACATTGGAAGAGCATTATTGAATATGTAACTAAATCCGATTTAGCTCAAAGAGATAGCGATAACAAAAAAGCTCTTATCAATAATTACACAAAGTACTGTCGGAAAATTACATATCTG…
>PbraOR60
ATGCTGGACAGATTTTTCGACAGACTCGAGGACCCAGAACGCTCCTTTCTGGGTCCTGTTAAAAAATTTCTTAGCTTCTGGGGTATGTGGCTTCCCAAGGATCTTAAGATGTTAATTATAGCCATCCTTTTACAACTATTCGAAACCGTTTTCATTATAACCGAGTTTATAGATGTCTTCTACGTTAAGGAAAACTTAGATTTGGTTTTAACAAACCTCAAGTTTTCGATGCAAGGTGCTATTAACATGTGTAAGGTTTGGTCATTTATCGCCTGGCAAAAAGATTGGAGGGCTATCTGTGACTATGTGACGAGGGCAGATATAGCTAATAGATATTCTTTAGACCCCAAGAAGAAGAAAAATATTGAAAGATTTACCAGGTACTGTAGAATAGTAACC…
>PbraOR61
ATGTTCTTCAAACGGTTTATTAAATCCAAAGAAGATCCCGAGAAGCCGCTTTTGGGTCCAAACTATTGGCTTCTGAAGAGAAGTGGTTTTATTTTACCATCAAGCACTAAAGCTAAACTGGGCTACATTTTTCTACATGAGTTGGTTACTGTATTTGTTCTGACTCAGTATATAGAGCTTTATGTCGTTAGATCTAACTTTGATTCCGTTCTAACGAATCTAAAAATATCTGTACTGAGCATTGTCTGTATTGTGAAATCCAACGCGTTCATATTTTTTCAAAAGAAATGGAAGGAAGTGATTGATTACGTAACGGAAGCTGATATTTGGGAGAGAAATACACGAGATACTGCCAAAGGCAAGATTATAAATAACTACACAATTTATTGTCGCAATTTG…
>PbraOR62
ATGCTTACAAAGCTCGAAGATCCTTTATTAGGTCCAACAATTAAAGGTTTAAGGGCTTGGGGCATGTGGCAAGCAGAAAGAGGCATAAAACAAGTCTTCTACAATATTGTCCACATTCTTGCGACCCTTTTCGTAATTAGCCAATACGTTGAACTGTGGTTTATTCGGTCTAAATTAGATTTGGCTTTACGTAATTTATCTATATCGATGCTCAGTACCGTGTGCGTTGTTAAAGCAGGAACTTTCGTATATTGGCAGAATGATTGGAGAAATGTAATCAACTTCGTATCTTTGACGGAATTGAGTCAATCGAAAGACAAGTCAACGGAGCATATAAGCCGGGAATATAGGAAGTATTCGAGACTTGTGACGTATTTATACTGGTCTTTGGTTGCTGCT…
>PbraOR63
ATGTTAAAATTACTAGAGGATCCTAAGTACCCCTTGCTTGGTCCACATTTACGCCTTTTGAAATTTACTGGTCTTTGGCATCCAGTTCTTGATCGTGTTACCCGATTAAAGTTACTGCTGTTTTATATCACAACAGCATTCTTCTTTAGTCAATACATTAAATGCATGTTAGCTATCAATGTCGATTCAATAAAGCTCATACTGCAATATATCCCTTTTCACATAGGCATTGTTAAAGCATGTTTCTTTCAGAAGAACTACGCTAACTGGTCTCGTTTGATTGAATCTATATCGGAAATAGAAAGGCATCAAATGCTTCAAAATGACATCACTATTCATATAAAAAACTATATTCACCGCAGCCGTAGGGTCACATTCTTTTTTTGGGCGCTCGCACTT…
>PbraOR7
ATGGATACGCCACTCGATATTGCCAAAAGGGAAATTCGTGAATCTCTAAAGTTTAGTTTGTTTGCTACACATTGTCTTGGTGTATCATTTACAACTCCTAAGAATAAGTTTGTAAGAACCTTTAAAAATGCTGTATTTTTCACAAGCATTTCGTTTATTATTCTCCACGCGAGTTCAGATGCAGTTAATATAGGGCTTACACCGTTTTCTGTTGAGAATGTCGTGCCGCTCTTGCATACACAGTGCTATGCAATACTTAGTGCTATAAAGGCGTGTGTATTATGGTACAAGAAAACTGTGTTTCAACAATTGCTGACCGAACTTGCTGAAATTTGGCCTGTGCCTCCACTAACGGCTGAAAGTCAAAGGTCCAAATACAAAAGTTTGAGTACTTTGCGC…
>PbraOR8
ATGGGTTTAGACACGGCGAAACAAGAAATAAAAGATTCGTTAAAGCTTTGCATTTTCTTTATGAAACTTATTGGTTTTACGTTGCACAAACCGACGAATTTATCTGATATTATTATTCAGAAAATAACATTTACAGTAACCGTTATATACGTCACTATTCATGTTTTTACTGAATTATCATTCCTTTATGTCACATCAACAAATTCGCCGCGGGTCGAAGATGTGGTGCCTTTGATACACACGGCTGGATACGGAATATTGAGTATTGCAAAGTTCACTGTGCTCTGTTTTAAAAGAAAAGTATTTGCACAACTACTGGATGACTTGGCGACAATATGGCCGGTGCCACCACTTGCGAAAGAAGCACAGACTTTGAAGAGTAACAGCCTTAAGTCCCTC…
>PbraOR9
ATGGACAATAAAACTCTGGCGAAACAAGAAATAAAGGATTCGCTTAGGCTTAGCAATACTATTTTAAAACTTCTTGGCTTCACGTTAGATAAAGCAGCAACTGTATCCGATGCTGTGATTCAAAAATTTTTATTTATTGCCACCTTTGTTATCATCACTATTCACGTTCTTAGTGAATTGGCGTGTCTTTATGTTACATCTATAACTACGCCACAGGTTGATCAAGTAGTTCCTTTACTTCACATAGTTGGCTATGGAACATTGGGTATATTAAAATTCACTGTACTATGTTCTAAAAGAAAAGTGTTTGCACAATTATTGAGTGACCTGGCCACAATATGGCCGGTACCGCCTCTTAAGAAGGAAGCTCAGAGTTTGAAGAATAGCAATTTGCGGACC…
>PbraOrco
ATGATAAACAAAGTCAAGACACAAGGTCTGGTGTCAGACTTGATGCCAAACATCAAGCTTATGCAAATGGCCGGACATTTCTTGTTTAATTATCATTCCGACAATGATGGCATGTCAACTCTACTTAGGAAGGTGTATGCCAGCGTTCATGCTATCTTGATTGTCACCCAGTATTTGTGCATGGTGGCTAACATGGCCCAATACTCCGATGAAGTAAACGAACTCACGGCAAATACAATCACAATTCTTTTTTTCGCGCACACCATTATCAAGCTGTTGTTTTTTGCTATCACTTCTAAGAACTTTTATAGGACCCTCGCAGTATGGAATCAGTCGAACAGCCACCCTCTCTTTACTGAGTCTGATGCCCGGTACCACCAACTAGCCTTAACGAAGATG…

## Sheet: Prapae_nt
>PrapGR1
ATGAACGATTCACGGAACTTTAAAATGAATCCAATTCGTATCGAACAAATCAGAAAATTCGATGCATACAAAGAATTTAATGGAAAAGCTGTAAAAGAATACGATGCCAAGGAGGTGTATGGACCCCAAATTACAGATAAAGATGGCGAACTTTTGGACAAACATGACAGTTTCTATATAACCACTAAAAGCCTCTTGGTCTTGTTTCAAATAATGGGAGTTATGCCGATTATGAGAGTAGCTAAACACGCGCAAACAACGAAGCGGACTACATTTAACTGGATATCAAAATCTACTCTCTGGGCTTACCTTGTTTGGTGTTTGGAAAGCATCATTGTGATAAGAGTGGGCAAAGACCGGTTTGCAAACTTCCAACAGAACTCCAATAAGAGATTCGAT…
>PrapGR10
ATGGCTAAAGAAGAAAAAGATAGGAAAATACCCTTATGTCATGGACCTTTAAACCTCGTCCTTAAAATGTCGCGAGTGTTCGGCATGGCACCTTTGACTTTTACACCTGAAGGGATAAAATTTTCACTTGTATACTATATGTACGGCATCGCTTTGATAACAGTTCTTCAAACAACAATATTCGTAGGTTTCGTGATGGACGTGACGTATCCAAAGCAATCGCGTAAAACGGCCACCACACATATGATATGGCTTGCTTATCAGACAGTTTTATCCGCAGTCACTATAGTAGGCTGTTATGCGGCCCCCAAGCGCTGCCGGTGTATAGTCGATGCGCTAACTCGTATTGAGAAGATCAGAAACTTTCTGGGCGAGATGAAGACAAAGCAAATCGTAGTG…
>PrapGR12
ATGTTATATCAATGTGTAAATTTAATTATTTTCTGTAATTTTTTATGTGGTTTCTATGTTAAATTTTCAAAGCTTTATATGACGATTTTGTCTACGATTTATTGCGCTTCGATTTCAGTTTTCATCCTATATGGATTGTACTCAAGACCTCTTATTAATACATTCTATGTTTGGTCGAATAATTTCTGTATGTTTGACACTATTTGTTATATTTTATTTACCTATATTAATGGAACAGTGTACGTATCGAAATTTCTTAGAAAGATATCAGAAATTGACGGCTTACTTCACTTTCAACGCCCCAAATTTTTTATTAAAACAATATTGTTCTTTTTATTTATTTTCTTTGAAAAAATCTTTTACTCTTTGGAATATTACGCACGCAATGATGTGAGCACG…
>PrapGR13
ATGATAAAAACATCAAAATTCCTTAAAACGATTTTCATATTGCAATACCTATGTGGATTTTACACCGATTTTTTTAAAAGAAGAAAGTGGAACATTGTTTTTAGGATTATTATGGCAATTTTGATTATTAATATTTTATATGCAAGTCTAAGCATGCGACGGCAAAATAATGTTGTTTTGTTTTCAATAATAGCCTGGTTTAATCTTTTTGATTATACTCTAGCTGTAATATTGTCCTTTGTTGGTGGTAATGTACTACATTATTGTCATAGAAAATTGCTTAAGTTAGACGGTCAAATGAGATGGCGTAAAATCAATCTATCAATGTCGATAACTATTTCTATTTTTTTTATACTTTTTTTTGAGAAATCCTATATTGCATGGGGTTATTATGCAAGT…
>PrapGR14
TTTTTATCGAAACGATTAGGCGTTTTCTTTAATGGAATGATTCGATCTATTATTTTTGAATGGGCCCTATTTTCTACTAAAACTTTGAGAATATCATTTGAGAAATTGGTTTTTAAATCTAACAAAACAATATCAAATCATGAAACGGACGATATACTTCGAGTCGTTATCACGTACGCTAAATTATTAGAGAACATTAATTCTGTGGGATGGACATTAAAGATAATGATGCTTAAAGATTGCATTTTTATATTTTACTACGTCATATTAGTTTCAGTTGGATTAGTATTTGCACCTGATTATTCTGTTAACCCTTATATGGTTACTGAGACAATAATTATAATACTGAAATTTGTATTGCCTTGTGTCTTAATGGAGCTGACAAAGAGTGAAGTGGAG…
>PrapGR15
ATGCCTCAAACCTTATCTTCACTTATGTGGATTATTCTAATTTCACAAAATTTCTGTGGATATTATACCACCATGCATAAACAACACATTTTTAATATACCTGCTCGTGTTCTTTGCGTTATTTTGATATATATAACAGTTTATAAAAACATAACTCAGTTATACAAAGAAGAAAGTACGTATCAAACCTATGGTAAAATATATCAATTATTATATTTTCTTATTGGTGCAATAATGGCCTTTATTGATGGGAATGTATTTTCTCGTTTTCACTCAAATGTACAGTCGATTATGTCCGAATATTCGTTGAAATTTGGCTACCGCTCTTTTATGCGTACGATAACAGTTTTTACTGTTATATTTTTTATGGAAATTTATATTATTTGGAGTGATTTAGCT…
>PrapGR16
ATGCCCTCTGCAATTAAACAATCTCTGATAACAATTTTACTGGTGTCACGATGGTTCGGAATTAGCCCAGTGAAATGGGAATCGCTACATCTTCGTGTATCTAAGGGTTTTTACATTTATGGAGCCCTACTGTTTTGCTTTATAGCGACGGTAATGATAAACGAGACGTTTCCTGTCATTCTTACTTTCATTCAAGAAAAGGAATTTGACTTTGTGAACAATCGTACTGAACTCATTTTAAATAAACTAATCATCAAGGAACTCATACCATTTGGGTATATGGTGCTCAAAGGCCCACGTCGTATGGCTGTCATGATTGAAATTCTTAATCAGCTTGAAAAGGTAAAGGAAAAAAGAGTCAGATTTACACCGGAGAAAAAGGGAAAGAAGAAATTTTAC…
>PrapGR17
TTTATATATTATATCTTGTTTTTAAAAAAATCCAATTTTTTTCATACGTTTCATTTTCAATCCACTTGTATAACTTTTTTACGAATTTCGACTGAATCAGCACGAGTAACTTTATATTTGGTATTTTCGTTGTTATGCACACGTATAAAGATCTTTCAGAAGAGGCTCAAAGGTAATATTTGCCATCGAAACGAGGCGCATTTTTTGGATTTATATAATGTGTATTTGAAAATACACGATATGTTCAAGGAACTTTCGCCTGCGTTGTCCGTAATGATGGCAATTAGTTTGGCATATGTATTCGTTGATTCACTCATCGTTCAATATAAAATTACTTATATGATTTTAGGTAACACGTCTCAAGACTTTTCTTTCCAATTGTGTTTGGTATTACGATGT…
>PrapGR18
ATGGTGAAATACGTGTACGACTTTAAAAAGTTAATGTTACTAAGAATTATATTGGGCTGGTACAATGACTACTTCATTCCTGGATTAACACTAAAAATATATTGTGGAACATCTCTATTGGTTCAGCTTATCTTTTTTATACGCTTAATAATTCTAAATAAACCGACTTATAATATAAACCTTCTATTTAAGATTTTTGGTGTGTTGGTGGGGACTATACCAAGTTGTATCCTGTCTATTCTGACAGGCGATCGCTATCTATTTCTGTATTGCAGGTGGGATGACATTTTAGACTCTGATAAACAAGCCAAGCGTATTTTCCGAATACACCAGATTCTGTTTGATTCAGTACATTTCTTTATTATTATTTTCTACATATTATTCTATATTTGCTGGTAT…
>PrapGR2
ATGATTCCGGACCACCTTTTCGATGAAGGAATTAATTATTCCTTATTACAAAAGGATATGGAATGCGTTAAGAGACATCGCGATGTTTATGAAAAGTCTCAAAGGGATTATGAACGTGAACAACGTAATATGCTGTCGTCCCAGGATTCGGATACCTGTGAGATTCATGATCAGTTCTACCGCGATCATAAGCTACTGTTGGTGCTGTTCAGAGCCCTGGCTGTTATGCCAATAACGCGCTCTCGACCGGGAACGATTACGTTTAGCTGGAGGTCTAGAGCCACGGCCTACGCGATTTGCTTTTATATTATAGCTACAGTGGTTGTCCTGTTTGTTGGATACGAAAGGGTGATGATATTGAGGTCAATTAGAAAATTCGACGATTATATTTACGCTGTG…
>PrapGR22
ATGGCTCTGTTAATTGTCATCTGCATTTCATATGTAGCAGCATTGTGTGTGTCACAATCACCGTACGGTATTGATGGTATAAAATTCGAACTGCCAAATGCGGCACCAGTCTTACTCGTAGTGATTCAATTTGTAATATCAATGTTAGTGCCTTTTATGTTCTCGAAGGATAATGTTATCATTGTGAAATCATTGGCCCAAATAGATCACCTGTTAGATGTTGACGAAAAACTCTATAGGAAAAGCAAACGAAGAATTCTGATGGTAGAGTTGACCCAAACATTATTTACATTTAATGGAGTGAAATTAGAATTTATAAGCGCGTCACCCTCTATATTTATGATAGGTCAGTTCATTACATCTTTGATTGCTTCATTTCTATTTTCAAAAAAAAATATT…
>PrapGR27
CCTGAGGCCCCAAAAATTAATAATTTAGTCGAATCTAAACACCACGTTCTACATCAAATTAAATATTTGCTTGGACTGCAAATGGTTGTTGGCATAAATCGACTGTATTTATTTTTCAATAATAAATATATAATTACATTGGGATATTTATATACCGTAGTTATGACAGGTTTTATCATGTCTGTGATGTTGAGTAATAATATGAGTAGTGCGACCTATATTGTATTTACGAATACTGTGATAATAGAATTTGCTCTATTATCGTTCAACTCCATGGTACTCTACAAGAAAACATTTAAGAAGTTCGTTGAAAAAATGGAAATGTTCGATACTATATTAAATATAAAAAATCATCCCCAACTCGTGAGTTTTACTTTTCTGCATTTATTGTTGTACATT…
>PrapGR28
ATGTCGAAACCGGAAGTGCGTGTGAATTCTTTTTTTAAAAATCGCTCCTACTGCGTGGATCGAATTTCGAAAATTTTCATAATAACGGAAATGATTTTGGGACTTAATCACCTTGCGTTATTAGGGAATATAAAAAGCATAACTATAAAAATCGGATACGCGTACTCCGCTTTCGTTTTGGTTGTTTTGAATTACTTCCTGTTTGTGAACTATGTATGGTCGGTCCCTTTAACTGCGTATAGCTGTTCGTATTTTATAACGATAGTCGAGTGTTCGCTATTGTGGAAACGATTACGTAATTACTTCAAACATCTCTCCTCGTTTGATAGAGTAGTCGATTGCGATATAATATTATCACGTACATCAAAATATAATTTAGTACAATGTATATTTTCATTA…
>PrapGR29
ATGTTTTTAAAGTTTAATTCAAGTGTTTTTTTCAGCACATTTATGTATTTTCGATTACTGTTTGGCCATTTTTTTGATTCTACATCGAATATCATTCGACTCTCGAGAAAACTTTATTGTATATCATTTGGCGCAGTAATGATATATAATTGTATTTATTTCGCCGAAAAAAACCCACTAATGCCTTTATTTTATCTGCCAATTGGGTTTCTTGTAAATTTTACTCTGTCCATGTTTTTTGAAGACTTAATTATCGAGGCCATAACTTCAGTCGCAGATTGTAGGTTCCAAGGAACATTGTCTTATCGAATTATAACTTATATTGTTATTCAAATTTCAACAATTATTGCAACAGTTCTATTGAAAAACTCTTTTAGTTCGACATATTACATAATTCAC…
>PrapGR3
ATGTCCCTTTATAAAAGTAATATCTTATACCCACAAATACCGAATGGGTGGGCGCATCAAATGGAAAATAAACCGAAGAACAAAGTCATTTTCTTGGACGTCACACCAGCACGTAGTCCATACATAGTAAGACCCACCTCGAAGAACTCCATAATACCTGTAAAAGATAACTTAATTATACCAGAGATATACAAAGATATCGTTTACGAAAATATAAAGCCCGTTTTTACTTTATTGCGAATGATGGGCGTGCTACCAATCACTCGGTCCTCTCCAGATAAAAACCAGTTTAATATAGCGTCCCCTTCTATGCTATACTCTGTGTTTTTGTATCTATGTTTGATTGGCTATGTTCTCTACCTGTCTCTAAATAAAGTGCAAATATTGAGGACGGCTGAG…
>PrapGR30
ATGAAGCCACAGACATTGTTTAATATTTTTATGTATTTACGTTTACTGCTTGGAAATTATTTTAAATCTGATTCGTCGCAAATCAGTCAGATCCTGAAAAAAATCTATTGCTCTGTAGCCGGTGTTGTAGTTCTATATTATTTTTTTAACTTTCACGATAATGATCCCTTGTCACCCGGGTATTACCTTCCATTTGAATTCTTCGTAATTTTTGGTTTATCTATGTTTTATGAAGACTCTATTATTGAGAGCATCTCATCGTCCAAAATGGTTGATAAGCTTCTGGGGTTTCAAGGACCCATTTCATATCGTATTATAATATTTCTCTTCCTACAACTTTTAAACATATGCCTGGGAGGGGCATTTCATTTCAAATATTTTCACCATGTGCGCTCTGAT…
>PrapGR31
ATGGAGACTTTAAAAAGGTTTATGTTCTACCGAATGCTCTTTGGATATTTTTACGATTTTAGATCCACCAAATTGGTAAATGTTTATAAAGGAATCTACTGCGCTTCTTTTGTTTTAGTTACCAGTGTGTGTGTATGTTATAACATGACATTTAATATCACCAATTCCGTTGTGTACACATTGGCGGAATTTTATTTTCTAATAATAAAATCTTTTTTGTTTGAAAATAAGATCGAGAAATATTTCTACAAAATACTCAAATTAGACAAGATGTTTCGTATTGAACATAGAATTATTTCTTTAAAAATGTACTTCATTTTTATATTTGTGTTTATACTTCAATTGGTCGTATTCTTACTCAATTCTGATAAATCATATTTTATTTTTCTGATTTCTCTA…
>PrapGR4
ATGAAAGCTCAAGGAAAAATTTACATAAAAACCCCGGAAAGGGAAGACGACTTTTTGCCAACAGTGACGTGTATGTTTGCATTCGCTAAGACCTTCGGTATACCTACATATGGTGGTAAATTGGCATTAATAATGTCTGTAACAATATTAGTAATGTTAATAATTCTTGAGATCTTTTCTATTTGGAAATTGGTTCGAACTCTTAATGGCTGGAATCAAAATCCAAATGGAAGTGTAATAGCTCGCTTGTCAGGCTCTATATTTTATGGCAATGGTCTATTATCTATGCTCATAACGTGGAAACTGGCAAGAAAGTGGCGCTCTATATCTAATTTGTGGTTGGAACTGGAAACCAAATGTAGCTTGCATTTCCCACCGAATACCAAAATCAGAAGACGG…
>PrapGR42
ATGGAAAATTTAACAAAAGATATATTAGACGAAGAATTTATAGACATATTTCGATGGCTACATGTACTTCAAAATGTTTTGGGATATTCAAGAGTTGAAATAAAAGACAGATTTGTGACGCCACCAAAAAAAGCTTTTACTGTTTACTGTTTTATTCTGTGGACTATAATCATACCTGCGTCAACATTTTACTACACAATGTCTATGGAACTGAGAAGACTGGACAATATGATGATTGATACATTATACATTCCATACCAATATGCAGTTATGTCGTGGACTGCAAGTTTTTTGGTATATTGCAATCACTTCGATAAAAGTGACCTTAACTGTCAACTATTTTTGAAGCTACAAAGAATTGATAGACTGCTTAACTCAGCATTTGCTAAAAATAACAAA…
>PrapGR44.1
ATGTCCAATACGGAGTATTTATCCAAGGACATTCTTGAAGAGCAGTATATCCGATCGTTTTCTCCGTTTCATTACGTCGAAGTAGCTTTAGGCACAAGTCGTATCCATTTACGGAACAGATTTGTCACCAGCCCGACTTTATCCCAAAAAGTATATTCTCTTATTTGCACTGTGTTGACTTGCGCTCTCCACGTCTATGTGACAATTACGTACTTCGAAAAATACTATAAATATCCAGTTATTTACTACACTTTCGTAACCTTAGCTAGTATGCACTTTATGACATTCGCCTGCAATATTATACATCTAAGATTTTTCAATACCATAGAGAATCAGGAATTTTACGTGCAAATGCAACAGTTAGACAGGATGTTAAAGGTTCACGATTGTTTGAATAAC…
>PrapGR44.2
ATGGCCAAACCTGAATATCTATCGAAAGATATTTTAGATGAGGAGTATATGAAATCCTTTGAGCCTTTCCATCATCTCCAAATGGCATTAGGGTCGTGTCGTATAAATATTCAAAACAGATTTGTTAGCTCACCGACTGCCGCGCAAAAGATTTTCTCTATATGTTGTGTTCTCATCACATTATTACTATACATATATTCCATGAATACATACTTTAATCGATACTACGATTTCGAGGGTATCTACGTCACAAGTATCATTAGTGTTGTCATGTATTATTTAACTTTTTTCTTTAACATAATTCATTTAAGATTTATGAATTGCAAGAGCAACACAAGATTTTACATTCAACTACAAGAAATCGACCGTCTCATGAACGTCAACAAAAATGAGAAGTTA…
>PrapGR46
ATGAAGATTAAAACGATAAATCTTGTTGTCAAACTTGAAAATATACTCTGCGTCTATAGGAATTACAATTTTTTCTCAAGAAGAAATCGAATCCTTTGCAATATTCGAATGCTCTTTGAGCTGTCCCTAACTATCATCAGTACAGTATTGATTCTATCGCATCTCAGATCATGGTCAAAATTTGCATCGTACTTATTAACTCATTTCAATGGATTGATGATAATTATATTCGCAAGATGGTACTCTCAACCCTTCAAAAAACTAATCGATTACATTGATGCAAATCAAGCTCAGTTTTCGCCTGAAATTGAATATGTTAATATCTTAGAAAGGAAATACAAAACTTTAAAAATAATGCTTATTTGCTACGGAGTTTTAAGTACTTCATTTTTATTTTTT…
>PrapGR5
ATGGATATTATAAGAGAAAGGCCAACCTTCCAAAATGCTATGAAGTTAACAATTTTAATCGGTCAATTTTTTGGACTTAACCCCGTGCTTGGAATCACTAATATTGATACAAAAAAAGTGAGGTTCTCATATATATCAGTTCGTAGTATCTACAGCATTTTGACAATTGTGGGCCAATTTGTGGTATTTTTACTCTGTACAACTTACACAGTCATGTATTCAGATACATCTCTTCATTCAATAACTCCAATGGTGTTTGGAAGTTCGAATTGTATTACAACAATTTTATTCTTTCGTTCTGCTATCAAATGGCCCAAATTGATGAATTATATCACTAAAGTTGAGACAATATACCCAAATATTGATGGAGCATTCGTAACCAAATGTAATTTGTCATGT…
>PrapGR52
ATGAAAATAACAAAGGCGAAAGGCGTGAAGACTTTTTACTATGGTAACGAATTGCTTTTACCCAATCAACCGTATCATGATACCTTTCTGCAATTCATGAATACTATTTTCAAATGGGCGCGATGTTTTGGCGTACCGGGTTTTGGTTGTATGCTGTGGCAAATATGGGCTGCTGTTGTGCTGACTTCGTTGGCTTTGACGGAGGGTGGTGCTATTTGGAAAGTTATTAGGGCCCTGGCTGGATGGTCAAGGGATACAGCTAACCATAGAAGTGTCACAGCTCGATTCGCGGGCGCCATGTTCTATGCAGCTTCTTTAATATCCCAGATATTATGTTGGAGACTTTCATACAACTGGCGAGCTTTGTCGAAGTACTGGGCTTCTGTGGAATGGGTGCTG…
>PrapGR54
ATGAAATTTGAAACAACATCATACAAAAACATGCTGAATTTGTTTCGGCCAGTTATTATTATAATGTTCATCTGTGGATACAATTTCAAAACATTCACCCCCACTTTCTTAAGAAAAGTGATTGCTCAGTTATACAGCCTCAGTTTAATTATCATCGTCTCATATTCTACAATAACCTGTTGTTACGTCATCAACCCGTCCCAGTTCATGTCTCTCCTCGAATACGATTTCAGTGTCCTCAATTCTATGATCTATAATAGCAAAATCCTCAAATTTATTGCTAACCTCAAATGCTTGGATGGTTATCTCAGAATTAATAAGCGTCATTACAAGATTATCAAATTCAGATTTTTCCTCATTGCAGTTACACTGTGGATTATTAGAATCATATTCACGACA…
>PrapGR6
AACAAAGTGGACGTTTCAGAGTTGAAGCCAGCAAAATCACCGGCGACGTTTCGAGAATCGTTACGGGCTACATTAATAATTGGACAAGCATTCTCTTTGATCCCAGTTATCGGGGTCTTTAGAAGTACCTCGGATGTCAGATTCACCTGGTTGTCATGGAAATTCATGTACCTCTGTCTATCACTTTGTGGTCAAATTTTTATCACCATTATGTGTTTTCATAAAGTTGTGAACTCGCAAACGTCGCTTAATGGAACAACTCCAATTATATTCTACAGTACAACATGTATTACAATGTTAATGTTCTTACAAGTGGCAAGAAAGTGGCCGGATCTGGCCCGATACGCTGCTAAAATTGAGGAGTTGGATCCAAACTATGACACGAAATTAACTTATAAG…
>PrapGR61
ATGAATTTCTCTATAGTAAAGGGTATATTATATTTTCGTCTCGCTGTGGGTAATTATTGGGAGTGTTCTTCTTCAAAAACTGTTCAATTTTCATGTAAATGTTATTGCGTTGTCTATATAAGTGTAGCTACTTATGTTTACTTTTCAATTGGGTTTGAAGCGGCTAGTCTAAAAGCTAAGTATGATGTTAATTTATTTTGTTTCCTTATTATAAACGGGATTTTCGGTATTTGGAATAAACAAAAATATTTTACAAGATTTTATTCCGGTATAAAGACAATAGACAAAATAATTCATTTCACAAAACGCAAATCAGCATCTCTAGTCGCTTACATTACTTTGGTAGTCATTAAAAGTGGCTTCAATTTAACGGGCCATATTTTGATAAACGAAAGAAAT…
>PrapGR63
ATGATATTGAAACATCGATTGCCGTGCGTTGAAGAGATCAAGAAATCTTTTGGGATTTTAAATCCTTTTCTAAGAATTTTTTCGTTAAATTGTGACGTTTTTAAACACAAAAAGTATACAGTGTTATCGTTTGTAAGATTCATATTACCGGCTCTTATTCTTGGGTCCATTGATGCTTCGACATTATATTTCAAGATTTTATATACATATAACGATGTGGTGGTCTCTATTAGATACACAGATGCAGTACAAGTAATATTTGATTTTTTTCAATATATCGTTGATTTGTACATTGTATATAGATGCAGCAATTCTTTAGAAGAATATTACAAAATATACGAGAAATTGGATGAGGTACTTGGAACGAAGTACTGTGGAGTTTTGTACGGCAAGGTGCGG…
>PrapGR64
ATGTTTTCGTTCAGAAATGTATCAGTAATTAATTGTATTTTAGCAATTCGTCTCTGTTTCGGACATTTTTGCGAATTGTCCACCTCGAAACGTATAAACTTCATTTGCAAATACTATTGTGTAATATTTAATGCATACCAAATTTATTTTTGGTACAATAATTCAGTTTTCTCATCTACTTCTCGCTTTCTATCCTTACAAGCTACATTTATATTCTTCAAAGCTATAGCTAATGCGCTCATTACGTTTTATTTTAAAGAGTCTTATTTTTTTAAATATTGTGCAGTTGTTGAGACGATGGATAACGTGTTACGATTTAATGTAAAGTACACTATTTATTCCATTGTTGTTTGCGTAATGTCTACAATGTGCCCGATTATAAGCGCCATTTTCATATTT…
>PrapGR65
ATGTTTAATTTTAACAACAATTTTTCAATAAAATTGCTTTTGGGATTTCGCCTTCTTTTAGGACAGTATTGTGAATTTAAAACTAGTAAAATAATTCGAGTGCTTCTTATGTTCTATTGCTTTGTATTTCATATTCTTATGTGTTTAGTGATACATACGTACTTTGATTCAATTAAACTCATAGAACTTCTATGGTATATAAAATTATTGAAAATATTAGTGCCGGTAAAAGTTATCACGAATTTATGTTTGTCGCTATTCTATAAAGAAAAATATTTTCTTATATTTTATAAGAACCTCGAAACTATTGATATGTTTTTGAAATATAATAAGAAATGTGATGCTTGCATAAGTATTGGTATATTTAGTGTAATTATTTTTGGTCAATTGATTTTTGAA…
>PrapGR66
ATGTTGTTGAGAAAACTACTAGGTGCATCATTTTTCTCTTTAAAGTGGTCTCGTGATAAAGTCGTTGCGACATTCAGCTACCTCGGGTTCGTTTCCTTCAATGTATGGTACTTTTTGTACTTTTGGTCTATGTATAACGTTTTCATTGGCGATCAAACGATTCTTAGAATTCTATTTGAAACTAAAATAAGGCAGTACGGGGATTTGGTGGAAAATATTGCGATAACTGTTTATGTTGTGTACACGATGTGGAAGATTTCATATGACTTAAGCGGATCGACTGAACACATTCACCAGATTATGGAGATCGACGCCGAAATCGAGAAATTGGGTGAAAGGAGAGATTATTCAAAAAGTGCGACACTATCTTTATTCGTTCTGATTACGCATTTTGTCATC…
>PrapGR68.1
ATGACATCCGCCTTAAGATTCTTGCCATTAAGAAATATGGAACAAATTGAGATTCAAGATATTTTAACACCGATTATACTCGCGGGATCGTGTTTTGGATTAATACCGAATAGTGTAAAATTTTCAAAGGCAAAACAAATTTATAAAATAATCCCAAAATCCATATATTTAAATACTTTGTGTGTCGCATTTTTTCTAACCCTCCATATTACGGTTTTAATGTATCAACTCTATCTTGTGTTTTATATAGAAGAAAACACTAATACTTCAAAGAAATTAAATTATGCAATGGAACTCATTAATTTTATTATAGTATCAACAACAACATATATTTACGCATACGTTAATCGAGCGAAATATTTGAAAATATTTAACATGATAGTGTCTACATGGAGTGGG…
>PrapGR68.2
ATGTCTACACTAAGAAAAATACTGCCCTGTTGTGAATATAAACAAGAGTTTACCAACGACAGAGAAGAAATTGAAGATATTATAAAACCAATTATCACGACTGCAACCTTTTTCGGATTCATACCAATCAGTATAAAGTTTTCGAAGATAAAACAAATTTACGTACCCGTTCCGAAATCAATATATCTAAACAGTTGCCGTTGCGTCACATTTATTTTACTGAATATTGTATTCTTGAGTTTTCATTTCTATCTTTTGTTTGCATCGCCTGGGGGTGCTAACTTCGCCAATCTTCCAAAACGTATTAATTACGTATTTGAAAACCTTAATTTTCTAATTGTATGCATTACAGCATATGTAACTGGCTTTTTGAATCGTTATATATATTTACAAATATTA…
>PrapGR7
ATTATTTTCAGATTTACTTGGAAATCAATATATGCAATTTCCTGTTTATTTATAATTGTTCTACAATTTTTTTATCTCAGCATACATATATATGATTATACATTTCAAGAGGACATTTCATTCCGGCATACTATTCGATTAATCGATCATATGACGTCAACTATGGCAATAATAATATTTATAAAAAGCAGTTTGCGTTGGAAAACAGTTTTGGAAAATATAAATAAATGTGAAAGACTATTAAAATCGCTTAAAAATTCTAAGAAGTTTGTTACGCTTTCTAAGAGAATCAGTTGTATCTTTTTATTACCCCATATTGTGGACCAAGCGTTAGTCATAGCAACATTTATGAGCTTCATTCATAATTGTTTTACGTTAACTCTACGTGAAGAAATTCAA…
>PrapGR8.1
ATGGCTACGGACGGGTCATGCGTAGTAAATGGATCATTCCTGTTTATATTAAGGGTATCCCGAGTATTTGGTTTGGCTCCTATCAGTTTTAAGACAGTTGAAGATGGGTGCCGCATAGAAATTTTGAAGTCCTCGTATTATGAGTATATATTTATGGGAATGATTAATGTTCTACAGATCATATTTTATTTCCACAACCTTGTTTTATGGGATATTTTGGGAAAATTACATGTAATTTTATTTATAATAAAAGTGATAAATTGGGTACCGTTACTGATGTTTTTGAACATTGCAGTATTAAGCAGCAAAACTCGTATGAGAGTTTTTTTAGAATGTGTTCCGATAAATAAAACATATAATGCAGTAAAAGAGCGGAGACGATATACATTGATCACTTTG…
>PrapGR8.2
ATGAGTCGGTCTTGCGTTGTAAATGGTTCATTTAGGTTTTTACTGAGATTATCACGTTTGTTTGGTTTGGCTCCTATTACATTTTGCCCAGTAGAAGATGGGTTTCGTATAGAACTTTTGAAGTCCTCGTATTATGAGTACATATTTATAGTTTTAATTGATGGTATGCATTTCACATCCTTATTTGTTTACGTAATTTCTTCGAAAATAACGGAGGATATTCATGTAATTTCTTTGGGATTAAGGGTGATTGATTGGATTGCACAAACAATATTTTTAAACATTGCGATATTAAGCAGTAAAAGAAGTTTGGAATCATTGATAGACTGTGTTCCGATAAATAAAAAAAACAATCTTGCAAGAGAGCGAAGGCGTTCTCTGTTGATCATGCTGTCATTT…
>PrapGR8.3
ATGGGGGGGTCCTTCGTTGTAAATGGTTCATTTATGTTTCTATTGAGATTGTCACGTTTGTTGGGTTTGGCTCCTGTCAGATTTAAGCCAGTTCAAGATGGGTGTCGTATTGAACCTTTGAAGTCATCGAGTTATGAATATATATTTATAGTGTTTCTTAACGGTATACATTTTATAATTCTGTATTTCGACATAATTTCTCCGGGAATAACAGGGAATATTCATGTTATTTCTTTGATATTAAGGACGCTTTTTTGGACTACACAAACAATATTTTTAAACATCGCGATATTAAGCAGTAAAGGTTGTTTGGAATCGTTGATAAATTGTGTTCCGATAAATAAAAAAAGTAATCTTGCAAGAGAACGATGGCGATCGCTATTAATCGCGTTTTATATC…
>PrapGR8.4
ATGTCACCCGAACCAAAAGTCTCAACGTGGCAAAAGTACTACGGATTATTTATCATCCTACCATGGATAAATATTCTTTTCTTCTATACAACATATAGAGAGATTATACACATTAAAGAAGGATCTGCTGAAATTTGGACTGTGGTATTCATAATTTATACAACATTCTCACTACTGTATGTAAATTTTGCTGTTTGGACTGCTCCAACCCGCATTTATTCCTGGTTATTGTGTTTAAGGAATATTGAAAAGATATTAGTAAGAACTAAGAAAACAGAAGAAAAGGAATTGTTCAGATGTAAATTGTTAACTGTCTACTTCTTAATTTTATTGTTTGCTATGATCACAAATGCTGTGGAGGTGTGTAGTCAAGTGAATAAATGCACATTCATTTGCGTG…
>PrapGR9
ATGGAAGCCGAAACCCAGGCATCGTTTACTTTTCCACCTGAAGGGCCGAGAGAATACCACGCCGTGGGGGAGTGTACTGTCGGAGGAGCACATGCCTTCATTTTGCGGATATCGCGCGTGTTCGGTTTGGCACCGCTGCGGTTCGAGGCACGCGGCGAATCTTGGGCTGTGCGGGTTTCTCCCGCAGCCTCCCTCTACAGTTACATACTGGTCACCACACTCGTGGCCGGCACGGTGTGTGGGCTGTGCGCAGAGCTGCGTGCCGGAACAGCAGCGTCACCGCGCATGGCATCGCAAACGGCGCAGCTGGTTTCTGCATGCGACGTGTTGGTGGTGACTCTAACAGCGGCAGCGGCCGTATACCATGCGCCCGAGCGGATGCGTATCATAATCGCTTTT…
>PrapIR1.1
ATGTTATTGGTATTTGAAACAAATCTCCCTATACCCTTGATGTTATGGGGATTTATTGGCACTGTGGCTGCGTGGGATTTGCGATTTGTGTTGGACTACTTTAGAAGACGAGACGTCAGACAACTATGTCTTCTGCATTGCACTTCTCCTAACGACGAATTAACTTTTTGTAACACATTCATTGATAACAATGTCAGAATATCAACGTGCAGGATTAATAAAGATATAACGAAAATAGAAAGTGTATTACGAAAACACTCTGTTCCCGTCGGTGTGTTATTGAACGGATCATGTGATAACACATATAATGTACTAGATAAGTCATCGAAGAGCGGTCTGTTCGACGCGATGCATATTTGGCTCATTTTAGAGAACACCAGTGCTACACGGAACATGACT…
>PrapIR1.2
CGATTTCAAATAGTTTTGTTGTATCTTGCGAAATTTTCCATTGCATTTAGCCAAGAATCGGTGAAGATCGCAGTTAGTTATTTTCAAGAGAGGAATGTTAAAAACGTATGTCTGCTGTCGGGATCTAATAATATAGGTATTCAATTTACCAAAGAAGCCAATAAACATTCAATAACAGTTCTGCAATATATAAATAATGACAAATCAAAGAGCAGTTGTCAACGTCAAATTAACACACACACAGGCATTGTATTAAATACAGATTATCCAACTTTTCAAGATGTACTGGTTAATGCCTCTGAAAATAATAAATTTGATTCAAACCACATTTGGTTAATTTTTCATGAAAATAATTCGACTGAAATTAACACAATCTTTTCAATTTTAAATCTATCAGTT…
>PrapIR100a
ATGACTTTCACCAATCATAAAGATTATATACAGATGGACGTGTGGACAATGTATTCAAAAATAGGAATATTTTTTACTATAATCAGTGTTGGGTGTGGGTTTGAAATATCCACAATTAATCATGAAGATAATAAAATTGATATTTTAACCACAATTATTAAAGAAAATTACGTGTACAACGGCCGGCACACATTTCTCCTTATAGGGATATTTCCCGATCAATTTTATTCGAAACTAAAACATCTACCTGTTACATTTACTATAACCGATATTAATAAAGAAGACGAACAAATTGAAGATGTCGTTCCATATCCATCAAATTATATAGTTTTCAGTTGTCAATCAAGAAACGAATTCGAATCAGCTCTATTTAAAGTTGTAACATTACCATACTGGCAC…
>PrapIR100c
ATGCTGAGCACACGTACAATTTTTCTACTCTTTATTCAATTTACGCTTTCTAATCAATTTATATTAGACTCTGAAGACAACAAAACTGCGGGTTGTGTACGGGATATCATATTAAACAATTTTGAAATGAAATCGCAGATAACAGTCATTGATGGAGATAATTACAAGATATTACCCATTATTAATGAAATGCACTTTACCTCCGTGCAGATATTAACCAGCGACTCTAAAAAATTCAGTCTACCATTTAATAGAGAATATTTGATTATCACGAAGAGTTGTGTCGATTTCGAAATTAAATTTCATCGCATCACAATATCAACGACTTGGAGTGCAAATGCTAAACTTCTTGTTGTTATCAAAAATGTTTACGATCCGAGATGTATTTTTGACATACTC…
>PrapIR100d
ATGAAGATTCCGATTTTACTAATATATTGTGTGGTGACATGCTATGGAGATTTGGAACTATTACTTAATGCAAATGATAATATTTCGAGCAAACCAGATGACTGCGTGAATGATTTCATCAGCAATCATTGTGGATCGCATGTAAGCATTGTCCTATCACCTAGCAACATAAAATTCATTCCAATTAACAGTAATTGTGTTACGTATGTTGTAAGATCTTACGACCACAACCAGTGGTTCACTACAACAGATATTTATATTATTTATCTAAAGAATCTGGACATATCTGATTGGGAGTTAAGATATGAAGAAATGTGGAATCCTCGAGCGAAATTCATCATTGTCATATCACATAAAGTCACAAAATTGGATTTAAAAAAGGTCTTTGACCAATTGCTA…
>PrapIR100e
ATGGCTTCAATGAAAGTGGTGCTGCATCTTTTTCCGATCATACTGGTAAAGTATTGTGTATTATCTTTAGCGAATAACTCAGCTATTCTGAATAATGTTTTCAATGGAGAGAATTATTTGACTTCAGAATGTGTAAAAAAATTAATCACAGACTATCAGTGCGGGACTCATATTACTATCGTCGTTCCCAATGTTAATTTCCAAAATTTTATTAATATAAATAGCAGCTGTTATGATTATGTCGTTATAACATACGAACCTGTCGAATTTCCATTTAATACCAATTTGTATCTTATCTACTATAAGATAAATACAACAGGATCTTCACTTTGGAAACTGAGATATAGTAAATATTGGAATCCAATGGCGAAATTTTTAATTGTGACAACATCTGAAGTA…
>PrapIR100f
ATGTATAATTGTTATTTACCTTTCACAATATCCAATACTATAAAACAAGGTATTGTATCTAGATTAATTAATCGTACAAAAATGGCTTCAATGAAAGCGGTGCTGCATCTTTTTCCGATCATACTGGTAAAGTATTGTGTATTATCTTTAGTGAACAACTCAGCTATTCTGAATAAAATTTATAATGGAGAGGATTATTTGAATTCAGAATGTGTAAGAAAATTAATCACCGACCATCAATGCGGGATTCATATTACTATCGTCGTTCCCGATGCTAATTTCCAAAATTTTATTAATATAAATAGCAGCTGTTATGATTATGTTGTTTTAACATACGAGCCTGTCGAATTGCCATTTAATACCAATTTGTATCTTATCTACTATAAGTTACATACAACA…
>PrapIR143
ATGAAGACGGTATCTTTAGTTATTTACCTCTTACTTTCTTATCATAACTTAGGAATAAATTCACAAAACAGTGAAAGTAACATCAATGTGCTCTTATCAAAATGTGTTGTGGAAATAGCTATTAGAGATTTAAATTATAAACCTACGATTATAATAAACGATCCTGTAGAAACGAAATCTAAAAATGATTTGTTCAAATCGTTAGTAACCGAAGTACATATGAGTGGAATACCTAGTACAATAATTAGCGAAGACATTTGGTATAATAATACTGTAGAAAATGGTGATATACTATTAATATTAATAGTGAACGATTGTTCGGAGCTAAAAAACTTGTATTTAAAAAGCAAAGAAATTAAGTATTTAATAATTTTTCAAGATCAAATTAATTGTCATCAC…
>PrapIR2
ATGAACACCACATACACGGTTGGTTCATTATTGAATTGTGAAAACATTCAAACTCTGAATGAACACGAACACGATCCAGTCTGGAGGCAGACAGTTTTGGGTTGCTATGTTTTACACATTTTGAAAGATATACTTCAATTTAACGTTACATATGCACCTAGACTTCCACCTTATACCGACGACTACGAAGTACCAATGGCAAATAACTCAATAGACATTTACGTTAGACCTATGATGTTCAAAAAAGAGTATTTAGCTGACGCCTATCCGATAAATTTTATTTTCCAATGGAGGTTCGGCTTTCTTCTTCGCTTCAAAAGAACTGAGCTCAAGGCATTCTTCACCTTACCTTTTTCATCTCTAGTTTGGACTTGCATAATTTGGACTCTATTTCTGAGC…
>PrapIR21a
ATGAACGTGTTAATTCTTTTATATTCAACATGTTTCATGTTCTTGCGTGTAAAAGGAGAGATTGAATACTATCCATCGATGGGCGAGATAAAAAAAACACAAAAAGTTCAATTACATACAAGATTTAATGTGCTACAAACCTCGAAATATGTCAATAAACGAGGAGCAGATCCAGTATTTCACGGTCACCCTAAAACAAGAGAAGAGCTCTGGCGCGAAAGATTCTTGCCAGAAGATAAACATTTCGATCAAGGGCCATCCCTGTTACGTCTCATCCACAATATCACACTTAAATATTTAACTGATTGTACTCCTGTTCTTCTCTATGATAATCAGATATTTTCCGAAACCAAACTGTTTCAAGACCTCTTAAGATCTTTTCCTGTGACATTTATTCAT…
>PrapIR25a1
ATGCTACTGTTTTTAACATTTATCCAAACCATATTTCATTATGCGTTATCACAAACAACTCAGAATATCAACGTTTTATTAATTAACGAAGAAAATAACGCTTTGGCCGAGAAATCTTTTGAAGTAGCTAAGGAGTATGTTAGGAGAAATCCCAGTTTGGGTCTTGCTGTCGATCCTATTATTGTCGTCGGTAACCGGACTGATGCTAAGGCATTTTTAGAAAATGTTTGTAGAAAATATACAGACATGGTGTCGGGAAAGAAACCACCACACGTCGTACTTGATTTCACAACGACTGGAGTCGGGTCAGAGACTATCAAATCATTCACTTCAGCGCTAGGTTTGCCCACTATTTCTGGGTCTTTTGGCCAAGAAGGTGACCTTCGACAGTGGCGAGGT…
>PrapIR25a2
ATGCTACTGTTTTTAACATTTATCCAAACCATATTTCATTTTGCGTTTTCACAAACAACTCAGAGTATCAACGTTTTATTAATTAACGAAGAAAATAACGCTTTGGCCGAGAAATCTTTTGAAGTAGCTAAGGAGTATGTTAGGAGAAATCCTAGTTTGGGACTTGCTGTCGATCCTATTATTGTCGTCGGTAACCGGACTGATGCTAAGGCATTTTTAGAAAATGTTTGTAGAAAATATACGGACATGGTGTCGGGAAAGAAACCACCACACGTCGTACTTGATTTCACAACGACTGGAGTCGGGTCAGAGACTGTTAAATCATTTACTTCAGCGCTAGGTTTGCCCACTATTTCTGGGTCTTTTGGCCAAGAAGGTGACCTTCGACAGTGGCGAGGT…
>PrapIR31a
ATGCTGTCTAAGACGTTTCAATGCAGAAAAATAATAATGTATTACGAAGCTATATCGTTAGCATTTAGGTATAAAATTGTGGGTAGCATTATTATTTTTACGTGTTCTAATAAATTCGATGCAGTCAAAACAATTCGAAATTTCCAAAACCTTAACCTTCCGACTACAGTAACCTGCAATGCTAAAATATTTCAACAAATACATCACCATCGTTTACAAGGAGTATTATATATACCAAACAATTATGATGAATTAGATCAGGTTCCTTCCAAATACTTTTCGAATTGGTACAAATGGATAATTCTCGCTGATCGAATCCCTGATGCTCTTAATAAAGTGCGGTATGATGCAGATATTATACTGATAAAACCGGGGAAATACGGAACAGACAGAAAATTA…
>PrapIR4
ATGATTTTGCGTTTTATGAAATGTCTGGTAGTCAATGGCGTTGCTGTCGCCCTCAATGTGGATAAAAAGCCTCGATTTAATATAAAAATTGGAGTGGTAACTTTATCGACGAATTTAGCTCGAAACACATCAGTGCTGGCTAAACATATCAAACAGCTCAACGCCTGGGAATTGAATTCGGCCTCGTCTGAATGGATAATAGCTTTGAAATCTATATATGATATGAAATATATATACAAAGTATTAAATACATCTGAAGTCCGTTACGACCAGAATCTATTTGTAACTTTACCTCATAATCTACATAAAGGCAATAATATACTTTACCCAAACACCTTTGACAATTCTTTGAAATATCAAAGAAACACTGCGAATTGCTCTAAACAACATTTTCATTAC…
>PrapIR40a
ATGCTCCCCAAAGACTTCTCTCGAGCTATAGTGGATTTAGCTGCCGGATTACCGACCAGAGCCATAACTATTGTTAGAGGGAATTCAACCAATATCAGTACAGATGTTATTGATAATCTAATATATGCGTTAAGCAATAACAATATTGGAGTTGTTTATATGAACTTCAGAGAAAATAACAGCAAAAGCACCTATTATGAACATCAAAGGAAGGGTCTCGACACATCTGAAGAACGAACAAGTTTCATACTTTGTGAGGCTTACGAATGCGAAAATATTATTGCTGAGTTAACAGATATAAATTTCATTCACCGTTCGATGCTGTATATTTTCTACTGGGAACACGGGGCAGTTAGTAGAAAGTTTTGCGACAGTATCGAAGAAGCCATGAGAGTGGTC…
>PrapIR41a
ATGTTATTGGCACCTGATGTTTTGCTTCCTATCGAATTACTTTTGCAGACATTAGTAGATCATTATCTCAATACATCTTACTGTACAACAGTTATAACTGAAACGCCTTTACAAATTTTACCACAGATTTCACATCACTACATCCTTTTGAATCATAGCCTTGAGGATGTAATACTGGATGCATCAGAGGCTGGATGTTCAGACTTTATCGTACAAATAAGTGAACCTAAAAGATTTTTCTCTGCGTTGGATTATGCAACACATCGCGGTATTTTAAGGCGAAGTGATCGAAAGATAATTTTGTTACCATTAAACAATACTGAGGATATTTCGCTTCTAGATGTGTTGAGAATGAAAGAAAGCAGTTTTGTTGTCAACCTCCTTCTGGTGCTGCCTTCT…
>PrapIR64a
ATGCATTTTATGGCTAATATAAGTTATTGGATTTCTTTAACTGACATAGCAGTTATTATAAATATCTTCAAATTAAAAAATGTAGCAAATGTTATTCTTCTCCATTGTTTTGAACTGCACCATTTTCATCAGGCTCAGAAAATGTTTATAGAAAATAACATTCGGGTAGCTGTTTCTCATATAAATGATACTTCTGCACGTAATTGGTTGTATACCGATTCAAGGTTAGGTGTGATTGTTGACACAAGTTGTAACTTTTGGGAAACAAGTTTCAGTGCTTTCCATGAGCCATTCCAAAGCCCTCTCTCGTGGATTTTGAAATCCGATAACATTTTAAAGACAAAAGACATTTTATCTCAATATCCTATTGAGTTTACATCCGATGTTAATGTATTATGC…
>PrapIR68a
ATGGCAGGACTTTTGTTTTTTCTATTAAGTGGGCTATTTTTTAATTGTGGTCTATGCGACATAGGATCTATTATTAAAGACATCAACGTTCGTAAAGACCTACAGAATATCATCATAACGATACTCAATGATCTGGCAAAAAGAAATGATGTCAATTGCGTCACGGCAATCACTGATGATATCTATCTAAATGTCTTTGACGGGGGATTCTTTAGGAGAACTAGGTCTCTGCCTTTCCTGACGATTGTTGTTCAAGAAAATGAGGATTTACTCTCACCAAACTTCGATACTTTGGAATCCATTTCTCGTGCGAAAGATGATGGTTGTAACTTGTATGTGATTTTATTGGCTAACGGCTTACAAGTAACAAGACTTTTAAAATTTGGCGACAGATATCGA…
>PrapIR75d
ATGGATCTCTCTTCGTTCATATTAGCATATTTTTCGTCCAAAAATCTATCTTTGATTACCGCGTTCTTGTGTTGGAGCCCAGGAGACATATCAAATCTACAATTGCGCACGAGGTCTACGGGAATTCGCCTGCGGGTATACATTAGCGAATTTTCCGTGCTACCTGAGATGCCGGCTTACCGCATCTTCCGCGAGGGCATGGTGCTTGATTTGAGCTGCCCTCATGCTCATCTGATTCTTAACAAGGTTTATAGCAATAAAATCTTATTCATGATTAATGCGTCGGTGAGTCGTGCTTTTAATCACCGGCATTCATGGCTCTTATTGCCTGAAATTCTCTCCAACGATACTGACTTAGTTGATGTCCTCCAAGAAACGGTCATCCTACCAGACGCAGAT…
>PrapIR75p.1
ATGAATTTAATGTATATTCTTTTTTTAACCGGGTTACATTTTATTTATGGCCTAGAGCGCAGTGTATTTAATATTATTGGCTCATTTGTGGTATCTGAAGAAAAACCAACATCTGTTCTGATTCCAAGATCGTGTTGGAAATATTCTGAAATCAAGATGCTTAGTAAAATCATGTTCGATATTAATATCAACGTTGGCTATTCGTTACAACCAAATAGAAGCGAATATTTCGCGCACAACATTCTAATATTAGCAGATCTATCGTGTCAGGAGACAAATTTGTTTTTGATAAGGGCCAGCGCTCAGGGATACTTCAAATCACCGTACAGATGGCTTCTATTGAACACTGAAGGAAACAACTTTGATGTATTGGATCAGCTGGATTTGCCACTCAACAGT…
>PrapIR75p.2
ATGATGAGTTGTAGGCTTGTTATATATTTTATATTTTTACTAAATACGATTGTTTATGGCAAGGATACAAATACAATTAATATGATTCGAAGCTACGTTGCTAACGAGTGGACACAGACGATTGTACACTGTAACTTATGTTGGGAGAAAGCGGCACAAATTCGTTTACATAAAGAACTCACTAAGGTGGGTTGTCGAGTTTCTTCAACAATGGAACCGCGTAGTACACGTCAAGACCATAATTTGCTGTTTTTAAATGATTTGAACTGTCCTGATGCAGAACAGCCGTTTAAAATAACAAGTCTTCTAAGATTTCCGTACCGGTGGCTTGTCCTTTATGATGACATGAATAATAATAGTACAAACGCAAATGGAGAATCGTTCAAGGAGCGTCTTCTA…
>PrapIR75q.1
ATGGAAACAAAACTAACAATGCAATTTAAAGTCTTGTTTTTATTTTTATTTTTTAAAAGTAGTTTGTCTATCAACTTAAATGAGATAAAGATGACAGTGGATTTAGTAAAATCTTTTAACAAACCTACCGCAATTTTTGCTTTCATTTGTGAATATAAACAAAACGAAATTGTACAGATGGCAAAATTGTTGAGCCAACATTCGCTCTGTTATGTTTTTAATAGTGATGATTTTAACAAAATTCCTCAAAATAAAGATGTGTTTATAATAGTCGATTTGAACTGCCCAGCAAGTAAATCTCTGTTACAAATGGCAAATGATACACATAAATTCCGAAACCCATCACGATGGTTTATCATCGAACAAGTTGAGAAACTGGGAAATTACAATTTTTTGTTC…
>PrapIR75q.2
ATGAAAATTCAGTACAAGGAAATCATGAGAGTGCTTCTTTTGATAGTTGTATGTATCATTGCAAAGAAATGTTTTGCAGAACATTTAAATACAGACTTAATTTTAGATCTGAGAAACGAGTTTGGAAAACGGTATTCGTTGGTATTTTTGGATTGTTATAACGAAGATGAACTACGTAAAATGAGTTTGGACATTACAAAGAAAACGGATGAACCAATAACGGTGCAATTTATGAACAATAAAATGGACAATGTCAAACAAAATATAATGTTTATTGCGGATGTCGGATGTTCAAATATAAAACAATCTTTCGTCACGGATGAAGCGAAAAAACTCTTTCGACCGCCATTCAAATGGATATTTCTAAATAAGCAACATTTAAATCTAAGCGACTCGGTT…
>PrapIR76b1
ATGGCGGGATTAGAACTTATCTTTTCTACTGTGTGCAACGTGACATTTTGCGGAACTATAGATGATAATCCATTGCACGATAGTAAACCTGAAGTCAACCAATTGGAAAATTTCGTAAATGGCACGCATCTGAGGATTGGAACGTACAATTATTACCCTGAGAATTGGGTAGAAAAGACTGAAAATGGCACATATATAGGCAGGGGAGCAGCATTCGACTTGGTACATATATTACAGAGGAAATACAATTTCACTTACGAAGTTGTCGTTCCGGAAGGGAACATTTTGTATGGCGATGACAGATCACTGGAATCCCTCATTGGGCTTCTTCAATCCAAACGTATTGATATGGCAGCGGCATTTATTCCAATTATCAAGAACTCGGATCAATTTATAACA…
>PrapIR76b2
ATGGCGGGATTAGAACTTATCTTTTCTACTGTGTGCAACGCGACATTTTGCGGAATTATAGATGATAATCCATTGCACGATATTAAACCGGAACGAAACCAGTTGGAAAATTTTGTAAATGGCACGCATTTGAGGATTGGAACGATCAATAATTACCCTGATAGTTGGGCGGAAAGGACTGAAAATGGCACATATATAGGCAGGGGAGTAGCATTCGACTTGGTACATATATTACAGAAGAAATTCAATTTCACTTACGAAGTTGTCGTTCCGGAAGGGAACATTTTGCATAGCGATGACAGACCACAGGAATCCCTCATTGGGCTTCTTCACTCCAAACGTATTGATGTGGCAGCGGCATTTATTCCAATTCTCAAGAACACAGATAAATATGTAACA…
>PrapIR7d.2
ATGACGTTCATAGACAGACCTTCACCAGATAATTGTTCAGTTTTTGACACGCTCGCAATAACTGCGGCAGAAGTGGCTTTAAACAATTTTAGATGGCAGTACGCCTCGTTGATCCTATTTAACCCGTCATTTTTCTGTGGTGTCAATGTTTTCTTAAAATTTTATCAAAAAAGCATAATTATAGGACAGAGCACATTCAACCCATGGGTTTTGGAAAACACTAAACAATTCGTCTTATTCATAAGTGATTTAACGGATCTGTTGGATTTCTTGGACTGGTTAAGAACTCAAAGATTTAATAACACAGGAAAATATCTGGTGATATGTAACACTATAGCTGGATGGACCTGTGATGAATCTGTTGCCGTTAATTTGCTTTGGAAATATAGAATGGCAAAT…
>PrapIR7d.2.1
ATGTTTGAAAGATATCCAGTTGAAGAAATAATAGAATTAATGGCACAGAACGCTGCTCAAGTTGCTTACCATAGTTTCAAGTGGCAATACACAACTTTGATATTATTTAACGCTTCGTGTTTATACGGACTTGACGTATTCGTGAAATTATATGACAAAAATATTAAACTATACAATGTGATGGAATCCGTACCGGATTTAAAAAGTGTAGATGTTAATCAGTTCATCTTATTCGTAGCTGATGTGACCGAGACACAGGCGGTCATAAATGCAATAGAAAGACAAAATCTTAACGCAAATGCTAAATTTATAATAATTTGTAAACATAGTACCGAATGTAACGAGGCTCAAGCCGTAAAAATAATGTGGACTTATAGAATTTTTAACGTAATATTTATT…
>PrapIR7d.2.2
ATGTCTGGTGTATTAGAAAAAGATATTATAGAAAGTTTAAACACTGACTTATTGGCTGAAAGTGCTGGATATATTGCGTACCATACATTGAAATGGCAATTTGCAACCTTAGTTTTATTTAATGCTACCTATTTTTATGGAGTTGGTGTTTTTGTGAAAGTATACGGTAAAAAAGTTAAGTTGAACACTATTTCAAAATCCATAAATGATAATCATTTCGTAGATGACACAATACAATACGTGCTATTTTTAAACGATATTCCAGATATTGTTTTGACGTTAGAAGCACTGAAATTCCAAAAATTTGACCCAAATTCGAAATTTATTATCGTATGTTATGATGAAAATGAATGTGATGAGAACGAAACTATACCAATGTTGTGGAGTTATAAAATCTTA…
>PrapIR7d.3
ATGTTACTTTTACTCGCCTTAATAATTGTTATCAAACATTCTACAAGTGCTGACCTTCATAACACAGCAGCTTTCATAGCCAATAAAGAGTTTTCATCTAATTATCCAACAACAGTTGTATGGTGGGAAACTGCTCCAGAAAATATACATCATTTTACCAAAGTATATAAAGGTCTTGTAGTTACACTTTCACTTAATTATAAAAATGTAAATGAAACAGTGTCAACCAGAGAATTCGTCTATGATCAAACAGTCATATATGTCAAACATGTTGAAGAATTCAGCTTAATTTTAAAAATGTTAAAACTTTCTTTGGAACCCATTCAACTTATTTTGGTGTTAATTGAAGTAAATCACAGTAGGATTACTGAACTTATACAGGTTGCTTGGAAAAATGAG…
>PrapIR7d.4
ATGCTAATACGTTTAAGAGATCTTTCTCCTCATTACCGTCTCCTTATACTTTGTGCGTGGATTTTAATGACGTCTCATTCCTATGGAATTGTTGCAAAAAGTAAAGAAGAGAAAATTATTCAAACAGTAGTTCAAGTAGCAAATATCGACTTTGAATATAGAACGAAAACTACTGTTATTGCGAGAGATGTTAATAGTTCACTGATCAACAATTGTTTGAAGGAGTTTAAAGGAAGTGTTATAGTCGAAGCCAAAGATAAAGTACCAAAACAAGTTGTCTTGTTATTAAATTCGTATTATTCGTTCGTAAAGCTCTTTGGTGTTTTGAAACCAGATTTAACAGGAAAAACAATACTACATAGCGGAGCAAAATTTTTAATAGTTTTATTCTCGAAACCA…
>PrapIR85a
ATGAAAGTCGTAATAGGTGTGTTATGGCTTCTTCCATGTTTTAGTTTGTGTCTAAAACCAAATAGTATTCTCTACAAGGAAATTTTTGAGTATCACAACGAAACGTTCTTCAAAGCGGAATATGCATATGAAGTCGTGACCAAAATATTCAACGCATACAAGCAATGGTTCTTTACTATAACATTCTGCGAATTCACATACTTCGAAAATAGAATTCTTAAATACATTGAAAACTACGGCGATGGTTACCCAGTGATGTTACTCAATGGTTGCCCAGACACTAACAACACTAAAGTAAAACCAAAAATTAATAAACATGGTCAAACAGCATACGTGGTTACTTCAAATGATTTATCAATAGAGGAAAGTGAATTCGCCATAGAAGCATTTATACGCACG…
>PrapIR87a
ATGATTTCTATTGTATTTCGGTATATTATTTTAGCCAGCACGATGTATACAGTTTTAAATGTGAATCCATTACTGATGCCAGTTGGTGAGGACGAAAGTGTTCAAGCATCCCAATGCGTCTTAAAACTTTCTGCAAAATATTTTGTTGAAAAAAAAGCTCTGAGCGGTAGCATCGTGATTGTGGGAATTAATGCTCAAGCGTTTACCAAAAAGTTTCTATTGCAAACCGTACACAACGGAATAAAATATTCGATAATGGTTAAAACCCCGTATTACCCACACGCTAACGCTTCACACTTTCGTGAAAAGGCCAAAAATTATATGATGGTCTTAGAAAACCAAATTGATCTGAAAAATTATCTTAAGCTATTGAGTAAACTACCTACTTGGAATCCATTT…
>PrapIR8a
ATGGAGATTTATTTTTTACTGTTATTTATATTTTTGTTTAATCTATGTTGCGTCGCGTCTGAGGCTAGTCTTAGGTACATATTCATCCTTGAAAAACACGATGTTGATGTACCGGAACAAATTGCCACAGCAATCAAAACAATTGAGAAAGCAAAACCAGGACTCCATGTCTCTGATGACATCATATTTCTAGACAGAGAAAACGAAGAAGATGCCTACAACCAACTTTGTTCCTCACTCTCTAAGGGTGTATCTTCAATAATTGATTTGTCGTGGGCCTCTTGGGAGATAGGATCTGGTCTGCCCATCATCAGATCGTCTTTGGACTCACAGGATCTGATTACCGCTATCAATAGTTATTTGGAATCAAGGAATGCGACGGATGCAGCCATCTTAGTT…
>PrapIR93a
ATGCAATTATGGATCGTGATTTTGTGTTTATTAGGCCGCGTTGCCTCGGAAGATTTTCCCTCACTTATAACTTCAAATGCATCCATAGCTGTAGTTCTGGATCAGCAGTTCCTCAAGGATCAGTACCAGGGTATAACGGACGAGCTGAAGGATTACATCAAAGAACTAGCGCGGGTTAAGCTTAAGCATGGTGGAGTGATTGTGCATTATTACTCTTGGACTGCCATCAATCTGAAAAAAGGTTTCCTTGCGGTATTTAGCGTCACTTCGTGCGAAGACACTTGGTCATTGTTTAAGCGTGTTCAAGATGAACAAATGCTTCTATTTGCTCTTACCGAAGTGGATTGCCCGCGGCTCCCATCCAATGCTGCTATCACTGTCACGTCTTCTGATCCCGGT…
>PrapOR1
ATGTTAGATGAGAAAATGTCCAAATTCTATGATTATTTTATAAAGCTTGCTCCACTACAAGCTATAATAGTATTCATAGGTGAAATCTATTATTTGGTACAGCGGAATGATACTATAGATTTTTACAGCCTCGGAGAGGTTCTTATCAATTCTTTATTAACATTTATAACTTTTGCACGTGTGGTGTATCCTAACTTAAAATATTACGGAGTTATATTTAGAAGGTTTATTAAGGAATTTCATTTGGGAAACTTTATGCAATGTGGTGGTAATTATAAAAAGGTGGCGGATCGAATGAACAAAATCTCTAATTATTATACACTTGGTATGGTGCCAATAATATGGTTAGGCGTTATTCTTTTTAATTTATCCCCATTATGGACCAATGTAACAAGTGGG…
>PrapOR11
ATGGAAATAAAAAATTATCCGTCAAAAAAATACACGGATTTTTCACACACATATAAAATTATAACCTTCATGATGCTGGTGGGCTTTCAGTATCCAAAACCCGAGCTACACAGAGTGCGTGCTGTTGCATTATTTTCTATGCTCCTCTCTGTAACGCCTGTATGCATTTTCATCTTCATAGACATATACAAGTCGATTCTTGTCAAGAACTTCGTAACTGTCATTCGTCACTGTACCATAGTTGGACCGTTCTTGGGAGTATTTTGTAAGATAATGATAATGCACTTTAAAGAAAAAACAGCAATGCAGATAATAAATGAAATGAATCGCGACTACGAACTTTATAACACAATGTCACCATCGTACCAAGATATAATCGACGCATCCATCGCCAACTCG…
>PrapOR12
ATGTTATCATATGTTAAGAATCATTTTCTTAGAGTTAAATGTCGTTTGCAGAAAAATTCAATAGAAAATTTACTTTGGCTTGTGAACCTGATTCCAAGTGTTTCGGGATCATCTTTGAGTTCTAATCGGAAGGCTAACGTCCCCTTTTGGGTTGTCTCTGTGGGTCTCCTTACATACGTGTATGTAGCGGGGAATGTGATGTTTCAACTGAAATTCGCAAAAAGCCCCGGCGATTACATCAAGAGTAATGTCAATGTTTTGTTATTATTGCTTACATATAACAACTGCTACTGGTGGCTCAGACAATCGACACTTTTAAAGAAAGTTTTAAAACAAGTGAAAGAAAATGACAGACTAGCCAAAGAGTCAGCCGGCCAGTTTGGAATTCACGAGAAATTG…
>PrapOR13
ATGGTTTTTAAATTATCAATTTTTTTTATCCAAACCAAAAATCACCTGAATGGAAATCGTATTGAAAACATCTTATGGTTCGTTAATATAGTTCCTAATCTCCTTGGATTTTCCTTAGAACGAGATGAAGTGTTTGTACCATTTTGGATTGGAACTGCGTTAATTTTAATTTACGTATACGGAGTTGGAAGCATAGTGTATCAAGCGAAGTTCGCACGAGTGCCAAGCGACTTTGTGAAGAATTATTTTAATGTCTCGATTCTGATATTTGTTTTGACTAACTGCTATTGGTGGATAAAGCAAAGACCGTTGCTGAAAACTGTTTTGAAACAAGTCACGGAAAATGATAAATTATCAAGAGAAACTGATTGCCTATTGAAAAAACACGAGAATCTATTG…
>PrapOR14
ATGCCTTCTTACACAAAGAACAAAACCTCAGAATTTATTGCTCAGCTGAGCAGGCTACAATTCATGTGTGGCTTGACGTACATATGGGTTGACAACAATCAATCAAGGTTTTTCGTTTACTTCAATAAAATAGCTACAGTACTCCTATATTGTTTTATCCTTTCCGAACTCGCGTCACTCTTCACCCAAACACATTTATCTGAGAAGCAGGCGTCCGATCAGATTCTATTTGCATTTTCTCACCCTGTGCTCATGTCATACTCACTAAGCTGCATATATTACGGAGAAGACATAAAGAAGCTCTTATTTAAGCTCTCCGTCGATCTTAAAGGGCGTTACAATGATCTAGAAATTGAGAATGAGATGATAAGAAAAGCGAAATTGTACTCAGTCTTATAT…
>PrapOR15
ATGGAACGACTTCCGGCGGAAGTGTCAAAACCACTCTTTCTAAGTATTGATGTCTTAAGCCGGTCCAATATTCAAATATGGAATGATTATTCCATTTGGAAAAAAATACATATTTTATACATGATGCCATGTATTATAGCTTTCTTTATAGGCAACGCTCTTTATACAATCAACATGTTTTCGAGGGATGTTTCACTGTCGGAGGTTGCATACCAGATTTCGATTTTCTTGATTATGATACAAGCTACAATCAAAGGAATACTACTCATGCCGAAAAAAAAGAATATTGCTGAACTTATTGAGAAACTGGGTGCAACTTGGACAAAAGGCAATTTAAACGAACGACAAATCCGCAGTAAGAAATTTATATTCAAACGAATGGATCTTTGTCTTAAAATA…
>PrapOR16
ATGTCAAAGTTAGATCAACTTCCGCAAAATTTCGTCAAAACCTTTTATCGTCACATACATTATGTTACATTTTTGGGAATCGATATTTTCGACGATTCGAAAGCGAATTATTTTAAAAGACAGTGTCAACTAGTAATTATTTACAGTGTACTTCTATCGACGGTTTGTGGGCAGTTTTTATATTTATTTTTGAGCCGTAGAACCAATGCAAGTTTTTTAGATGTTATTAACGCTTTACCTGGTACGCTTATGGCAACACAAGATATTGTTAAATTATGTATACTAACGATTAAGAAAAATGAAGTAAGAAAAGTTATTCTAGAGTTATCCGAGTTATGGCCTGTTGAGTCTAATTCAAAGAAAATGAACACAGTTCGTATTTGGACAAGGCGTCTATCA…
>PrapOR17
ATGGTTTTTAAAAGGAAAATTTCCTTCCCAGTTACTGAAAAGGATTACTTAAAATTAATTTGCAATTTCATAAACCGCTTGGGTTTAGCAGACTGTTGGTATGAAAAAGAAATAAGATATTCAATATTCAACAAAGCATTCTCCATTAGCTTAAATATATTTTCGGTTATTTTTACGGTCAATATATTGGCAGCCAATTACAGAACAGATTTAACTTTAAAAGAGAGTAATGATGTGCTTATATTTAGTTATGGTTTGCCAGCAATATGTCTGAAAGTTATAATACTTTATGCGAAAAAAGATGACATTAAGGTATTTTTCAAGAAACTTCTAGAGGCGGAGGTGACCCAAAAGCCGAACACAAAAGCTATAAGAGCCGCAATAGTTGTTTACGTGGTT…
>PrapOR18
ATGGACACACTTCGTAAATTCAATTTAAATTACTGCGATTTATCTACAATGCTTGAAAATATCGATTTTTTGCTAAGAATCTCCAACGTTAAAATTAATAAGAACAATGATCGCCCTATCAACATAATAATTCGGCTTATATGGATATTGAGCATAATATGCTATTATTATGCGTATGTGTTTTCGATGTTTTGGTTCGTACTAGTCCAGTATCCACAAACAGAGGATTTTATAACAGCCTGTGTCATGTTCTCTCTTTTAGTATGCAGTCAGCCCTCATTTGTGACCATGTTTTATATAATTATGAAAAGAGTGCAAAATCTGATCCATAGCTGTCTTCAATTCAACAATCTGGTAAAGACTGGAACAATATTTTCGAAAAACCTATACAGTCATTTG…
>PrapOR19
ATGTCATCTCAACTACCAAGAGATGAGGTTCTTTCGGAATTAAATTTTATCAAATATCTCACTACTAAAATATTCCTTTACCCTTTTAAGGGACGATCAAAGCTGACCATGATTGGGTACGCACTCACCATATTTCTAGTTTTATCTACAACTTTACAACTTATGATAACAATTGTGTCAGCAGAATGGTTGGTCATAATTAATACAGCACCAAATTTAGGAGTTTGTGTAATATCCGCTATAAAATACGCTAAAATACAAATGCATAGAGAACGATATAACCAGATATTTTTACATTTCTATGATGAAATGTGGGATGTTGTTGCAAATTCTGATATACATAGAAAGACAATAAGGTATTACAAAAAACTTGCCATGATCATAAATCGATTTTTACTG…
>PrapOR2
ATGGAACGACTGCCAGAGGACGTGATAAATCCATTACGTTTAAGTATTGAAATCTTAGGCCGATTTAATATAAAAATATGGAATAACGATTCCATGTGGAAGAAAATACGAATCGTTTACATGATGTTTTTAATTATCGCTTTCTTTATAAGTGTTGGTTTGTATACCATTCAAATATTTACGGCGGAGGTTCCAATTTCGGAGGTGGCCTTTCAAATTTCGACTTTTTTATTTTTAATTCAAGCCACATGTAAAGCAATACTAATTCTACGGAACAGAACAAATATTGCTGAACTTATAGAAAAAATAGGCGACACTTGGAGAATCGACAATTTAAATGAACGGCAAATACGAAATAAGGAATTTCTATTCCAAAGATTAAATTTCTGTCTGAAAGCT…
>PrapOR20
ATGACTAACATTTTCAAAAAAACAATTTCGAAATACATTCATACAGTTGGCCCCAGAAATGAAATCGACGACATTTTTTTCCCAGCTTTGGTGTACCAAAGCATTTTTGGACAGCAAGTATTGGATCCAACATGGTCTTGGAGAAAACATGCTATCCATCAACTATTAAATATAGTCCTCTTCATTTACGTTTTAATTGGGACCTTTGAATGCCTAAAAACAAGTGACGATATAGAGCTGCAAGCAGAGGCATACTACACCATTATCTTGACAATAATATTCCCGGTCAAAATGGTATTGTTCATAAAAAGTAGATTCACATTCCGCGATCTGTACGCAACTATAAAGAATACACTTATAGACGTAATACGAAGAAACCCCTCTGCGGATATCAAAAGG…
>PrapOR23
ATGGAACAAAGCAAAACATCAGAGTTTGTTGAAAAAGTAACCAAATTACAATATATGTTTGGATTACCTTACGTCTGGGTAGATGATAAAAAGCCAAAATATTTTCAACACTTCAATAAAATTTACACGTTTTTCGCAATTTCTTTCGTAATTTCTGACTATGTGTCGTTTATCACCCAAAATCACTTGACTGAGAAGCAAACAACTGACCGAACCTTATTCACGCTTAGTCACACAATTCTTATTTTGTACTGTTTCGTTTTCGAGTATTATAAGGAAGATATTAAACAGTTATATACAGTGGCGGTCAATTTGAAGACGCATTACAACGATTTAGCGATTGAGAAGAAAATGATAAGAAAAGCTAAAATGTACTTGGTATCTTTTGGTTCAATTCTT…
>PrapOR24
ATGTTTAAGAAATTACAGCAATTCGGTATACGCTTCTGTGATTTTCAGACAATGATAAGCAATGTCTCGATACTTCTGAGATTATTACTCATTAATATTGATAAACGAAATACTAAAAGAATTCCCTTTATATCCTTCGTAGTGACAATACTAATTTCAGTGGGTTACTTCTATACATATCTGATTTCTGCTGTATGGTATGTGTTCTGGCGTTGTCAGGAAACTGGAGACAAAATATCCGCCTTGATCGTATTTTCCCTTGGTGTTGCTAGTGAGATATCCGCTTTCAAATTGTTGTTCATGTATATTTACAGTGACACTATAAGGAACATCGTGGAAGGCTATCTCAATTTAGACGCTAAAACCCGTACGGAAACCCGTTTAGCTAAAAGCCTAGAA…
>PrapOR25
ATGAATAGAGGTGTATACAAACGTGTTCTACGGCATCTTCTGTCGTATAGTATAAATAAATGTGATCTTAATACGATGGTAGGAAATGTTAATTTCTTTTTGAGGGCGGTGACTGTTAATATTGATAAGAGAAATACTAAACCGATATCTGTTCTATTCTATTTCCTAACTATAATTGGTTTGATCTGTTATTACTACGTCTATGTGGTATCTGTGGTTTGGCATATGTTCGTCTACTATCCGGCGACGGGCGATTTTATCGGCACAGTTATAATGTTCTCGATAGGAGCCTTCACTGAAACTTGTCCTATTAAATTATTATTTATGATTATACACCGAAAATTAATAGCAAATGTCGTAGAACGGTATCTTCAGTGTGACGCCCAAATCGACCCTGGA…
>PrapOR26
ATGGAGAAATTTCGTCAATTTAATTTAAACTATTGCGATTTAAATACAATGCTGGAAAATCTGGATTTTCTTTTAAGAATCTCTAACGTTAAAATTAATAAGAACAACGATCAACCTATACCCAAAATATTTATAATAATATGGTTTGTGGGCATTATTTGCTACTACTACGCGTATGCTGTCTCATTGGTTTGGTTTGTCGTGGTAAAGTATCCGGCGACAGGGGATTTTAACACTCCATGCATATTGTTCTCAATATTGGCGTGTAGCCATCTCTCATTCGTCACCATGTTTCATATCATGATTTATAAGGAAAAACTTCAAAACCTCATTCAAAGCTGTTTAGACTTCAACAAAATAGTGAAGCCTGGGACAGTATTTTCGAAAAACCTTCACATT…
>PrapOR27
ATGGAAGCAGTACGTAGATTTCGTTTAGATTTCTGCGATTTACCAACTATGATTGAAAATGTTGATGTCTTATTGCGGATTGTTAATGTTAAAATTGTTAAAGCCAATGACAGACCCATCAACATCATAATACTATTCATGTGGGTGGTTTCTCTTACTAGCTACTATTATGCCTACGTCGTCTCGACAATGTGGTTCGTGTTCATTCGGTGTCGAGAAACAGGAGACCTGATAGCCGCATCCATTATATTCTCTTTGGCTGCGTGTAGTCAGCCATCGTTCATCACCATGTTTCATATGATTGTTTACAAAAAAAAGGTCCAAGGATTAATAGAAAATGTTCAAGGATTTAATTACTTCGTAAAACCGGATACAACTTATTCCAAAAATATTCACACA…
>PrapOR28
ATGAATGTTAAAAGAAAATTTTTATCATTTTGGGAGTCCTTTCGCAAGTACGGCCTTGGACATTGCGAGCTTGAAGAAATGCTGACAAATGTGAGTCTCCTATTGAGAACTGTCACTCTCAACATTGACATAAGGAATAAGAAACCGATACCACTAATCACCTACGTGTTCACAATATTGGGGTTTCTATGCTACTACTACATCTACTTCTTTTCAATGATCTGGTGTGCGTTTGTCCGCTACCGTCATTCTGGATACTTTCTGGGTTCAGTCATCGTCTTCTCCGTTGGAGCTTACACTGAATCCTGTGGCATTCGCCTGTTGTTTATGGTCATAAATAGCAAGGTGTTAAGAGAAGTGGTCGAGAGATATCGGGTCTGCAGCACTCAAGTGGAACCT…
>PrapOR29
ATGAGCGACTTAGATTTAATTTTCTATAAACAATTTAAAATCACAACAATGGCAATGAGATTCAATAGATCCTGGCCGTATGGAAAACGTAGTATATTGTGTAAAATCCAAGTTTTTGTTTCGTATTTCGTCAGCATTGTTACCTTGTTTTTCCTTCTTTACTCTATGATTTTTTACGACTTTCCGGACGAAGAGTATGGCGAAGTGGTCAAGAACGGGATCATTGTAATTGTATCGACTTCAGTGATAATCAAGTTTTTTATACTAACACATCACCGAGAATCTCTTGTAAATTTAATTAAAATCGTAAAAAACGATTATGAGGAAGCGAAGCAATTTAACATTAACGATAAAACTATCATTTTGGACTACGCTCAAAAGGGGAAGGACATTTGCAAA…
>PrapOR3
ATGGCTGCGCAATATTATATGCAGCCACCACGCGAACAGATTTTCTACAAGGTTCTCATTGTTTTGGCAAATTTGACAGGATTAGGGAGCAAGAGCTGGTGGGGTTACACAGTACCTAATATTTACTATCGTTTAAATAATTTGATTATCAATACATTCGCCCCTTCATTGCTGATATCACAACTGATATACTTATATGTGAATTTCAATGATTTATCATTCGATACATTGGGTATAATTTTTTCTATAATTCCTGTTACGTGTTTGGCTAACGTCAATGTTTATTCAGCAAAATTGTCATATTACAAAAAGCTCATGAAAGATTTCATATGTAAAATTCATCTTAACAACGGGAAAACTGAAAGCGCATTTACCAAAAAGAAAATCCTCATAATAGAA…
>PrapOR30
ATGAATACTCGTGAAGAGTTACGCTTCGAGAAAATATTTAAAACCATGCTAAAAGCACTGTGGTTAAACAAATCTCATCCGAATATACCACGAGACATGAAGTGGTTTTTCCATTTTTTTATTACGTATGGAACATTCGCGCTTGGTATGAGTTTCGCTGCATATAGTACATTTTTTCACGATATGAAGGATAGAAACATTAGTCAGGCCTGTTATCACGGAGTTTTAATTGTTATTTTTACTGTCGTCTCCTTATATCAGTTTGTCATGGGGTGGCATCGATTTCGCTTTCAAGATTTAATAAGTCAAATTAAAGAAGACTACGATCAGGCCAAACAATGTGCTATTGAAGACTACAATGTAGTATTAGCTTATGCTAAAAGGGGTAAAATGATACTG…
>PrapOR32
ATGGACAGCAGATTTAAATCATTTAATGATACGTTTCCGCGCTGTGCCTTCGCTTTGGCTTTCGCCCTCATCTATCCCAACTCCCATAACCTCAAAAAGAGATTGTATTACTTCATAGTCGTTATCTTTATTAACTCTCTCATATTGTACTGGTTTCTAATTTATTTATTCAGGTGCCTTTTTACTCTCGACTTGATAAATTTCGCGAATAACATCACAATCGGCGTTCTTGCTACACTTTTCTTCTTCAAAACACCGTACTGCTTATATAAAACGAATATCTTTGCTAAAGTTCTGGATAAGATCTCCTATGATATGCTCAAGGGTAACGATATGAATGAGGAATATCAGGAAATATGTGAACATTATATAAAAATTGGGAAGCTCGGTGAAACCTGT…
>PrapOR33
ATGATGTATCCTAATCCACGAAAAGACTCGAAAAGAACAATCGGGTTCGGTGTGATCGGAGTTTTCTGTGCCCCACAACTCTTTATAATGTTATTCGATATTAAAGAACGAATACAAATCAAAGATATAGATAATCTTTTTCGTCAGCTTATCATCACCGTGCTGCTTGTTTACGTCTATATTAAGATCTTTCTAACGCTAAACCAAAATATGAAATTCCGAGCAATACTAGATAAAGTTTCCACAGACTACGAATGTTACAACCATCTTCCTGAAGACTACCACGTCATAGTCACAGAGACAATAGAGAAATGCAAGAAATTGGAAATTATCTGGATTTTAATGGTGATATGTACTGGTTTAGCTTTTATCCTGCTGGCTTCTGTTTTAACTCTCCTT…
>PrapOR34
ATGTTGAAGCTACACCTATTTATCGACAAAGAAGATTTTTTTTACTTTAATGAAAAATATCTTTATTTTGTTGGATTATGGCCAAATCGACATTCTAAGGTGTATAAAATTTACGAAATTGGGTTACACATACTAGCAATAATTTACGTTATAATCACCGGAATCGGTACCTTTCAAATCAAACACGATACAGTTGTCCTGATGGCAAGTTTAGATAAAACACTTGTCGCATACAATTTCGGACTTAAAATATTCTTCTTTGTCATAAAAAGATCACAGCTACAAAAATTAATTGACGAAATTAAATACTCCGGTGACAAAGTGAGCGATGAAAGAGTGAAGTTCATGGCTGCACACATAATTGTTATAACTATTTTGTCTACTATAATTGTTTCGATA…
>PrapOR35
ATGTCCGAAAATCAAGCTCTAAAAGAAATTTATAATACTTTGAAGTTATGTGATTTTTGCACCAGAAAAATAGGTTTAACATTCAAAGCTACATCTAATAATTTATTTCGAAAATTGTGGACAAATTTATGGTTCTTTATTTCTGGTCTTATTTTATTTCTGATGGTCGCTGGCGAGATCAATTACGTCGTTAATAAGCTGGTTACGTCATCGTCAGTGGTGGAATTTGTATCAGGTTTGCATATCGCTGGTTACGATACGATGAGTTTTGGCAAATTGTTGACGCTTTGGTACAAAAAATACACTTTTAAACACCTTTTGATTGAGCTGGCGGATATCTGGCCGATGTCCGAACGCGATAAGGAGGCCTTTGAGATTAAACAAAAAAAGCTTTCGCGA…
>PrapOR36
ATGCTTAAAGTAAAAAGGTTTTACAACAAGGAAAATTTCGACTTTTCTGCCGGCTACGTCGATCCCTTTGAATTCCACAAAACTTGCTACATGTTTCTTAAAGCTTTTCAAGTTTGGGATGGGGCAATACCTAAATGGACATATTTGCTGAAAGCGTTAATAGTTTTCTGCGGTGTGAGTGCAATAACCATATTAAAATTCGGGTTTTACCATGGACTTGATACCCGCGATCTTCCGTATATGACAGAGGCGGGAACTTATCTTCTGATTATGATTTACAAGCTATTAATTATGTCATGCACTGTACGCAATCTGCCAGACTATCACAATTTATTACGAATTATCAGGGAAGATTTTCGATATGTTTGTGATAAAGGGAAGATATACAGGGAAAGATTT…
>PrapOR37
ATGGATGAAACTTTCCAAGTCTTCGATCGTATTCTCTCTTTCGCGGGCATTTCGATTTTCGCAAAACCAAACTGGAATTCCAAAGGATGGCTGATAATCCAGACTTTTATTTTCCTTTTAGGTTTTTTAACATTTATTTTTACCTCGGTTTTTGTGATGTCGAATCTATCTGACTTGCTGGTATGTATTCAAGGAGCTTGCGTGTGGACAACCGGAGTTATAATGTTCATCTCTTTTGGTATTTGTTTGATATTTAAAAAGGATTTTCAGGCTTTCGTTGAAGAAATGGCGTTTTGTGATCGAGCTTTAGACATACCACTTGTAAGGTCAGTTATATCGTTACCTACTACGACGGGTAAGCTCCATGAGTTGAAGAACCTAGTACTCACTTCACAGCTA…
>PrapOR38
ATGCCGTCCAACATAATTGGCATTCCGGGATTCGAAGAAATTTTCAATCAAATTAAAATTAATTTTTGGTTCATCGGTATACCATTTGAGGAAAATGTAAAATTACGATTTTATATTATGTGGTCTTGGCTCTTCGTAATGATCATCCAGGAAATCTTATATTTCATATCGAAGTTTTCCAACGAAAATTTCCTGGACCTAACTCAGCTCACTCCGTGTACTTGCATTGGTATATTGTCGATTATAAAAATCATATTAATCGCTAGGAAAAGACTTTACATCTTCAAATTATCGAGCAGCCTGAGAAAATTGTACGAAGACATTATACGAGACGATAAAAAGGTGTCCCTCGTCAAAGCGAATTTCGTATTTCTCAAATACTTGACCAAGTATTTCTTT…
>PrapOR39
ATGATCCATAGTTTGGGTAAAGATTCGTTTGATAAGTCTTTAATTTTGATCAAAATCTCTCTCTGGTTCTCTGGTGTAAATGTGTTTCGTAACAATGAAAAAATTTTGCCTGAACAAATTTCGTACCTATTTCATGTCAATTTCTTCTGGCTGTATACAGCTGTGAGCGGTGAATTATACTGTATCTACGGATTTATTCGAGAAGGGAAAAGCTTTGAAGAAATATCATTGATTGCTCCCTTTCCGCTAATTTGTGGCTTGGGAACTGTCAAAGCTGCATCCATTTATATCAACAAACATGCAGCCGTCACAGTTCTTAAAAAGTTACGAGAACTGCACCCTGACATTTTGACAATTAACGAGAAAGATTCCGAAAATCATAAAGTACAGAGCGACATA…
>PrapOR4
ATGTTTATAGACATTCCAGAAAATGATAGAAAATATAAGAGTTTTAGGGAAACTTATAAATATACAACTTTTTCGATGATAACATCTTTTGTTTACCCAAATTCTAAATTTATTAAACACCGTTTGTTTGGTTTCGGATTAATTACGTTAACTTCGCTACCTATGGTAATATTCATCAGTATAGATATCGTTAGATATGCTATGGATGGAAATATTGTAGAATTTATTCAGCAAACCAACCTTCTTGGACCGTTTCTTGCCATTCTTTTTAAGATGCTGATTCAATGTTACTGCAACCAGCATGCGTTAGCAATAATAAACGAAATTAACCGTGACTATGCTCTGTATAATGACATGTCTGCCCCGTATCAGGCGATCGCGGACGAAAGCATCAAAAGC…
>PrapOR40
ATGGCTGAGTTACGAAATAGTGAGTTTGAAAATTCGTTCAAACTAACCAAAATATCATTATTCCTATCAGGTATAAATCTGTCAATGAAAAGGTCTTTTCCCTTAAATTTTCTCTTTATTTTAAATTTACTATGGCTTTTTACTGATGTATCTGGTGAATTTTATTGGGTGTTCGAAGGAGTAAGAGCTGGTAAGAGCTTTGAAGAACTGTCAGTGATTCTACCGTGCACTGTCATTTGTTTTTTGGCCGCCTTTAGATGTGTTCCGTTGTATCTTAATAACAAGCTTCTAGCTAAAATTTTTAATAAACTATGTGAGATTCACCCAAAAGCAGAGGATAAAGAAAATAACACTGAAAAAGAAGAGAAAGAAATAACAGGACGGGCTGTTAAGCTGTTC…
>PrapOR41
ATGGAAACAAATCGAGCCCTTAAAGAACTCGATAAGATTTTTTTGTGTTTAGGCCTTTCTTACGATAGGTCATCTAAAAAAGATCGTATAAAAAGGCGCTGCATCTATATTTTTAACATTATCTGGCACAATAGTGACGTTTTCGGCGCGCTCGTCTGGTTTTATGTCGCTTTGCAAAATGGAGCGTCGTTCATTGAGCTAACGTATATAGCTCCATGTCTCGCGTTCAGTTTTCTCGCAAATTTTCGAATATATTCTGTAATAAGCAATGAGGAGAAGGTCTACGAACTAATTACAACGCTAAGAGAGCTGGAACACCGAGCTATGGACGATACGGATATAACTGAAATCTTTAGAGAGGACACGAAATTCTTGCATAAAGTACTGAAGATGTCTAAA…
>PrapOR43
ATGAAAATCCTTCCGCGACTTTCTCGAAGAAAATTGTCTATCTTAAGCCCGTATCTGCCTTACGGCGTTTTAGAATCCTGGGACGATCTTAACCCGCGTCTCTACCACGCTATACACATTTACTGGCTTAAATTTTATGGCATGTGGTATAACAAGTACTCGCCAAAATGTTTGTATTTCTGGTTGCAGATAATTTATACTGTAATTGTACTGTGGCTTGTTTGTTTGCTGCCTGCGATTGGAGAAATCGAATATTTACTGAAACGGCAGGATAACGTTGGAGAAATCGCTGAAGGGCTTTATTTATTTCTGAGCGAAATGTACACGTATTTCAAAGTGGCGGTGTTTTGGTTGAATAAGAGGAAAATTTTGAGACTACTTAAATATTTGCATTGCAAG…
>PrapOR44
ATGGGTGATATCATACATTGTTTTCAAATTAATGAAAAATTTTGGAATATATTAGGCATACACCCGAAACCTAATAATAAATTACATTTGATATATTCCGCTGTGTTTGTGATTTTCTTCATAATTATATACGACTTTTTATTTTCAATCAATTTCTATTTCATGCCAAATCAGCTAGATTTGTTCATTGAAGAACTTATTTTGTATTTTACAACAATTGGTGTTGTGTCGAAAGTCTTAACATTCGTTTGTATGAGAGCAAAAATTACCCAACTACTCAGTATATTGAAAAGTGACTTATTTCAACCAGAGAACGAGGAGGAATACCACATTTTATGTGAGGCGAATAAATTTAATATCACCTATTGGAGAATAGTTGCAGTGGTTTCCATTACATCT…
>PrapOR45a
ATGGCTGCCATATCCGAGAGTTTCAATATAAATTTTATCTGCCTAAGATTTTTTGGTGTAATATGGCCAGGGAAAATTTCAAGTATTTACTATAAATTCTTTTCAGGCTTTTACATTTTCACAACATTAATAGTCTATTACATAATTCTCATATTAAACCTATTATATACGCCCAGAAATATCGAATTGTTGATTCGCGAAATATTATTCTTTTTTGCCGAAACACTGTCAGTCTCGAAGGCTCTCATGATTTTCCTTAAGCAAAAACCTTTAGTGAGAGCCTTTAATATTCTTGACTGTGAACATTTCAAAGGCGAAGGCGATAGAAGTAGAAAAATTGTAAGTCAATACATCGCCAAGTATAAAACGTATTGGAAATTTATCGCTATTTTGTCTCAT…
>PrapOR45b
ATGGCTAACATATCTGATACTTTCAACATCAATTTTATATGTTTAAAAGTTTTTGGTGTACCATGGCCGGGCAAAACTTCGAGCATATACTATAAATGCTACTCAGCCATATATATATTGGTATCATTGATATTATATTACTTGCTTATCATCTTAAATTTGTTCTATACGCCTAGAAATATTGAATTGTTGGTTCGTGAAGTGTTATTCTGTTTTTCGGAAACAGTTGCAGCTGCAAAGGTGGTATTGATTTTTCTTAAGCGGAAAACTATAGTAAGAGCTTTTCGTATCCTCAACTGTACATTCTTCAAAGGCGATGACGAAAGTCAAGAGCTAGTCTCTAAATATATCGTAAAGTATAAAACATATTGGAAGTTGAATGCGATCATGTCGAATAGT…
>PrapOR46
ATGGAAATTAAATTATCATACAAAAGCGTTGAGGCGCACTTCTTAAATTTGCGTTTAGCTGGCTATTATCAAATTGATTTGCGGTCGGGGACGATGTATAGATTATTACATAGGTTTTACATGGGTTTTGTGCTTTCGTTGATGTTGTTTTATACGATGCAGCAGGCGTTGAAGGTTTATGAGGTCAGGGAGAATATAGGGCATGTGATGGGAACAATGTTTTTATTTTTAACTCACACCGATGCTATTTACAAACAAATTCTATTATGGGCTCTACAAAATGACGTCGAAGATCTTCTAGACACCATGAAAGGACCCTTATATAATCAAGGGAAGAAGGAACACAATTATTACTTACTTAAAACGATCCGTGTTACAAAATTGCTGCTATACTCCAAC…
>PrapOR47
ATGAGTTCAACCAAAAGGATAGAACGAGTAAAAAACTATGTTCACTTCATGTTGCTACCATTAAAGATTGTGGGATGTTGGGAATGGTATCCACACCCCGTAAATAAACAAATTTATGTAAACAATATATATATCTGCATGATTTTATTTATTTTGACTAATCTACCTTTATCATTAGTTGTACACTTGTACACCGAATGGACGGATGTAATGTCAAGTTTGGACAAAATGGCGGACGGGATGCCACTGTTTGTATCTGTGGCGATTGTGGCGTATTTTGCAATTTATAAAAAAGAGTTGTATGAATTAACCGAGTTTATGAATTTTAATTTTAAATGGCATTCAGCCAATGGACTCACCAATATGACGATGGAAGGGAGTTACAAATCTGCCAGGAAT…
>PrapOR48
ATGAAGTTTTTCATTGACCACACTTACTACGGTCTAAAGTTCTCACTCAATGTATTGCAATTATGTGGTTTTTATGCGCCTGATACGTTAACGGGGTTTGGAAGAACACTATACGCTGTATACTTCATTATGTTTTATGTGTTAATTATTGGTATATATATCGTGATCCAAGCCGGGGAGGTTGTTCAAGTCTGGGGTGACATTCCGCTCATGACGGCCGCGATTTTTCTTCTGTTTACTAACTTTTCGCTCTCTTTTAAATTATTTAATGTAATGTTGAAAAGGGAGACAATCAGGACAATGGTCAATGACTTAGAACAAGAGTTAATTTGTGAGAAAAGAGAGAGTGGAAAGAAGATAATTGCAAGATTTAATCGTCAGGCGAGACTTCAATTGTTG…
>PrapOR49
ATGAGTTTTTTCATTAATAATACTAACTATTCCCTTCGGGTATCCCTCACTTGGCTTAGGATTATGGGGTTATGGGCTCCAGATACTTTAGGATGGAAGAGAATGTTATATACTTGGCACACAGGCTTTGTGTATATGCTTGTTGTAGGCACATTCATCATAATCCAAGCTACTGATTTATTCATTATCTGGGGAGATATACAACTCATGACGGCGAGTGCGTTTGTACTATTAACAAATCTGACTCACAGTTTAAAAATTCTCAACATGGTTGTGAGAGGTGATCGTATCAAGAGCATCGTTAATAAAAATTATACGGTATTGAAAATGCAAGTTTCTGTTGAAGCCAAGAAAGCGGTAAAAACATGTGACCGTGAAGTCAATATACGTTCAATGTTA…
>PrapOR5
ATGGATGGAACTATAACTTTCTTCGACAGAGTACTTTCTTATGCAGGCATAAAGATTTTTTCCAAAGCTAATCGAAATTCCAAAACATGGCGCTGTTATATGATGTTAAATATAATGATCAGCATCTCGACTATTTTATTCACAACGAACTATTTCATACAACATTTCTGGAATTTCTCTAAAAGCATGCAAGCTGCTTGTCTATCTTTAACGTTTTCGTTTTTAATTCTTAACTTATGTAATTTTTTCTACTTTAAAAAAGAATTGGAGGAGTACATAGATGAAATGGTATTCAATGATCCTGGCTTAGATATGCAACTTATAAAACAGGTTTTGGAAATTAAAGTATTTGGTAAAAAGTATGATTTGAAACTGTTTATTATAAACTCTGAGAAGAAA…
>PrapOR50
ATGGCTATAGTTATTGCTAATACAAATTTTTCGTTACGCTTTTCTTTGACATATTTGAAAGTGTTTGGTTTGTGGCCCGCCGTAGGAATTGCGGGATGGAAGAAAATTCTTTTCTATACCTATTTTTTATTTATGTTTATGTTGGTTTTGGGCACATACATAGCGATCCAGCTGGTAGACCTGTGGCAGAACTGGGGGAATCTGTCATTGATGACGTCAATCGCCTTCGTGTTGTGCACGAATCTCGTGCACTGTGTGAAGATCATCAATCTGCTGCTGAGGAGGCGTCGTATAGAACATATCATCAACCGAAATGACTATGTTCTAAAAAATACTACTGGACAGCAGAAGATCGACATCATTCGAAGTTGCAATCAGGGAACAACTCTTCACCTGATG…
>PrapOR51
ATGACAAAACTTACAAATTTATTTATAAACAGAGCCCAGCACGTTATGAAATATCTAGGCGTTTGGGTTCCAAATGAAAGCGACACAATTTATCAAAAGTCATATAAAATATTTATGCTTTTTTTACAATACACATTCTTGTTATTTCAAATGATTTTTGTGGTTCAGACTTGGGGCGATTTGGAGGCAGTAGCTGATGCTGTTTACTTATTGTTCACTCAGGCTAGTTTATGCTGTAAAATCGCAGTTTTTCATATAAATATTGAACGCGTAAGAGAATTATGTCAGCAAATGAATAACGAAGTGTTTCAGCCTACGAACCTGGAACACGAACGAATACTTCAAATACGGGCAGAGAGTATAAAGCGACTGCTACTGTGTTTTATTGTAGCGGCAGAG…
>PrapOR52
ATGATAAATAACACTGACATGTTCTTAGGTCGGCCACGATTTATTTTACATTATCTGGGAATTTGGCTACCACCAGAAGAATATAAAACTCTGCGCAATATTTACAAGTTCCTTGTTATGCTTACTCAGTTTTCTTTTATTTTCTTGGAATTTATATACATAGCTGTCGTGTGGGGTAATATAGATGAAGTTTCTGAAGCTTCATACTTACTCTTCACCCAGGCGTCGGTTTGTTATAAAACAACGGTTTTTATGATGAATAAAAATAATTTAAAAAAACTTATCAGTTTCATGGAGGTGGGCATATTTGCACCGCAAACTGTAGAACATAAAAAAATATTGTCGGCACAAGCTAGAAAAATACGAAATCTTAGTGGAGTATTCTTGACAAGTGCCATC…
>PrapOR53
CAATCTAATCTAGTTGAATTGTTCAGGTCCAGTGCAAGCGAGTGCGTAGCAATACACACGCGAGTTTTGCGATTAGCAGGCTTCTTGCGCGGTGATGGCCCGGCTCACACCCTATATCGACGCGGGGTGCTAGCGATAACAACGTTGTACCTAGTACAAGAATGCGTATACGCTTACAAAGTACGCAGCGACTTGGACAAACTATCGCGCGTTATGTTCTTGCTCCTCTGTCACGTGACGTCACTCGCTAAGCAGCTGGTGTTCCACTTTGACAGTGATGCTATTAAGCGGCTTATTGATGCGCTAGATAACCCGGTATTTAAAAACGAAGGTGACGCGGCAATGCAGCTTGTAAAAAAATGTACCAGACGGGCTTGGCGTGTGGAAGCAGCTTATTCG…
>PrapOR54
ATGTTCTTTGAATATTTGTACCGCGTTATTTATCTCGCAGGTATATCATCTCGGGAGACCGAGAATAAAAAATACTACATATACAGTAGTGCTGTGAAGGCTGCCTTGGTACTAATATTTATGAGTGAATTGTGGCAGTTTTTTAGTACGCAGTGGACGTTAGACACAATCACAGATAGCTTGAATATACTAATGATTCAACTTGGCACTGTCTGCAAATATAGGAATAAGTTAGCTAACGAGAACGTGTTCAGAAGACTAGCTTCGTCCATGAATTCGCCGAACTTTGATGTATCGACGGATGAAAGGAAAAAGTTGCTGGAAGTTTGGCAAAGGAGGAGTGTCGGTTATTTAAAGCTACTTTTAGCACTAGGAACATGTACTGTTATAGCGTGGCAC…
>PrapOR55
ATGAAAAGCTTCGGCAATCTTTGGCGAAAGCTCACTCACACAAAAGCTCTACAGTTATCTAGTGGACGATTTGAAACGTTGTACTTTGAGTCTGTCTATCGTGTTACGTATTTAGCAGGTTTATCATTCGTTCATGAAAAGCTATTATACTCCATATACAGTACAACAGTAAAACTATTGTTATTTCTGCTATGTGTTTGTGAATTTTGGCATTTTCTGACAGCGCAATGGACCATAGACACTATTATTGATAGTGTTAACATCACTATTATTCAACTCAGCGCTTTTTATAAGTATACTAAAAAGTTGGCTAACGAGAGTGTGTTTAGACGGCTAGCTTCGTCCATGAATTCTCCACACTTTGATTTATCAACTGAGAAAAGAAAGGAAATATTTGAA…
>PrapOR56
ATGGACGGACCTCGCCGCTATTTTGCAATGCATTTTCTTTTACTGCGTTTCCTAGGATTAGGATACTGGCACCACCCTGACGAGGGTGATACCAGGAATTTTCCTGGAGTATACCTTTACTATGCCATACTCACAGAATTGGTTTGGGTCGCGGGTTTCGTCGGTCTGGAGACAGTTGACCCGTTCGTTGGAGAGAAAGATCTTGACCGCTTCATGTTCAGCCTTTCATTTGTCATCACTCATAATTTAACACTCATAAAGCTCTATATATTTTTCTTTAAGAACAAGGACATACAGGAAATCGTGCACATTTTGGAAATCGACTTGCAAATGTTCTATCAGAACAACGATCGAAATAGACGAACAGTTAAAGTTACGCGAATATTGACTGGTGCATTT…
>PrapOR57
ATGTCTAGTACTACAAAGTTTTTATTGCAAACATTCTGTAAGTATGTCTACATCTCTGGTTCTGGGAATTTTCACTATGACCAGAAAATATATAAAGAAACGTTTTTTTACAAAATGTATAGTGTAGTTTCCTATTCGATTTATATAACGATGATTCTATTGGAAAACTGCGCTGCAATATTTGGTAAATTTCCCGAAGTGGAAAAGAATTCAGCCGTTATGTTTGCGGCTATTCATAACATCGTACTGGCTAAAATGTTCCTGCTGTTATATCACAAGAATTCTATAAGGAAATTGAACTATGAAATGGGAACGGTGATGGAATATATCGAGAAAGAATATGTTATGAGGGAGCAATATAGAAAAGTCAAATTTGGTATTTTGTTATACGTTGCCAGT…
>PrapOR58
ATGAAGAATTATTACATATTGAAAACATTTTGTAAGAGAATTTTCCTCGTCGGCACGGGGAATTTTTGGTACGAAAACGCCGAGATCGGAGATGATTCTAGTATATATTACAGAACACTCTCTTCGATTTTATTTTTTGCATATTGTTTTATGACTTTACTGGAAATAATGGCAGCTTTTATGGGTGACTTTCCGGAAGATGAGAGACGAGATTCGATTACACTTTCTGTGAGCCATTCGATATTATTGATAAAGATATTCTCGATAATTTACAATAAAAAAATCATCAAACAGCACATGTCTGATATGGTATGTGTTTGCGAGCGGTACGAGAAGGAATCATCGCTGAGGGAGAGATATCGGTTTCTAAAGATGAACGTTTTGACATATTTTATTATT…
>PrapOR59
ATGATTGCAAAGGTAAAAGAGAACTCAAAGAAAGGAAACCATGAGCTATCTGAAGACTATATAAGATATTTGACGCAAAACCGACGCACAACTATGGAAGTATCAATCAAAAATTGGGTCCAGAAGACGGGATTGTGGTTTGGTCCACTGGGAGATAGTACGAACTGGTTCGCAAAGATTTGTATAATTTGCTTCTTTTTTACAAATGCGGCCCAATTTGTCTCTTTGATTATAAGCAGAAATGATCCAGAACATCTATTTAGATGCTTCAGCGTCCTCTCTTTTTGTGGAATGGGTTTTATTAAGCTGACATCGCTACAGCTAAGAAGGCAATCTTGGCGTTATCTCTACAGTAAAACTTATATTTTGGAAAATGAACAACTGAACAATGATGATACA…
>PrapOR6
ATGTTAAGATATCTGCTTCAAAAACTGGAAAATCTAGAGAGGCCGTTGCTTGGCCCAAACTTCAAGGCTCTAACATTTTGGGGTTTATTACTACCCGATAATATTTATAAAAAAATATTTTATCTAACCATGCATTTATTAGTAACAGTTTTTACTGCTACCGAATATATTGATATTTGGTTTGTTAAAAGCGATATAAATTTACTGTTAAATAATGTTAAAATAACGTTCTTAGCGACCGTTAGTGTCGCTAAAATAACTACGTTTTTAGCATGGCAGAAACATTGGAAAAGCATTATTGAATATGTAACTAAATCCGATTTAGCTCAAAGAAATAGCGACAGCAAAAAAGGTCTAATCAATAATTACACAAAGTACTGTCGGAAAATTACATATCTG…
>PrapOR60
ATGCTGTACAGATTTCTCGATAGACTCGAAGATCCAGAACGTCCCTTTCTGGGTCCTATTATAAAATTTCTTAGCCTATGGGGTGTTTGGCTTCCCAAGGATCCTAAAATGTTGATTATATCCATCCTTTTACAAATATTTGAAACAGCATTCATTACAACCGAGTTTATAGATGTCTTCTTTGTCAAGGCAAACTTAGATTTGCTATTAACAAACCTCAAGTTTTCGATGCAAGGTGCTGTTAATATATGCAAAGCTTGGTCATTTATCGCCTGGCAAAAAGATTGGAGGGCCGTCTGTGACTATGTGACGAGGGCAGATATTGCTAATAGATCTTCTTTAGACCCCAAAAAGAAGGAAAACATTGAAAGTTTCACCAAGTACTGTAGAATAGTAACT…
>PrapOR61
ATGTTCTTCAAACGATTTATTAAATCTATAGAAGACCCTGATAAGCCACTTTTGGGTCCAAATTATTGGCTTCTAAAGAGAAGTGGTTTCATTTTACCATCAAGTACTAAAGCTAAACTGGGCTACATTTTTCTACATGAATTGGTTACTGTATTTGTTCTGACTCAGTATATTGAGCTTTATATCGTAAGATCCAACTTTGATTCCGTTCTAACGAATCTAAAAATATCTGTACTGAGCATTGTCTGTATTGTAAAATCCAATGCATTCATACTTTTTCAAAATAAATGGAAGAAAGTGATTGATTACGTAACGGAAGCTGATACGTGGGAGAGAAATACGCGAGATACAGTGAGAGGCAAGATTATAAACAACTACACTGTTTATTGTCGCAAATTG…
>PrapOR62
ATGCTTACAAAGCTCGAAGATCCTTTACATCCTTTATTAGGTCCAACACTTAAAGGTTTAAGGGCTTGGGGAATGTGGCAAGCAGAAAGAGGCATAAAACCAGTCGTCTACAATATTGTCCACATTCTTGCGACCCTTTTCGTAATTAGCCAATACGTTGAACTGTGGTTTATTCGGTCTAAATTAGATTTGGCTTTACGAAATTTGTCTATATCGATGCTCAGTACTGTGTGCGTTGTTAAAGCTGGAACTTTCGTATATTGGCAGAATGATTGGCGAAACGTAATGAACTTCGTATCTTTGACGGAATTGAGTCAATCGAAAGACAAGTCGACGGAGCATATAAGCCGGGAATATAGGAAGTATTCGAGACTTGTGACTTATTTCTACTGGTCTTTA…
>PrapOR63
ATGTTACAATTACTGGAAGATCATAAGTACCCCTTGCTTGGGCCACATTTACGCCTTTTGAAATTTACTGGCCTTTGGCATCCAGTCCTTGATCGAGTTGCCCGATTAAAGTTACTACTGTTTTGTGTCACAACAGCATTCTTCTTCAGTCAATACATCAAATGCATGTTATTTCTCAATATCGATTCGATAAAGCTCATATTACAATATATCCCATTTCATATAGGCATTGTCAAAGCATGCTTCTTTCAGAAAAACTACGCTAACTGGGCTCATTTGATTGAATCTATATCGGAGATAGAAAGGCATCAAATGCTTCAAAAGGACATCAACATTCATATTAAAAACTATATTCACCGCAGCCGTAGAGTAACATTCTTTTTTTGGGCGCTCGCACTT…
>PrapOR7
ATGGCTACATCACTCGATATTGCCAAAAGGGAAATTCGTGAATCGCTCAGGTTTAGTTTGTTTGCTACACATTGTCTTGGTGTATCATTTACAGCTCCTAAGAATAGGATATTAAGAATATTTAAAAATGCACTATTTTTCACAAGCGTTTCATTTATTATTCTCCACGCGAGTTCAGATGCAGTCAATATAGGGCTAACACCGTTTTCCGTTGAGAGTGTCGTGCCGCTCTTGCATACACAGTGCTATGCAATATTTAGTGCTATAAAGGCGTGTGTATTATGGTACAAGAAAACTGTGTTTCAACAATTGCTGACTGAACTTGCTGAAATCTGGCCTGTGCCTCCACTAACGGCTGAAAATCAAAGAATCAAATACAAAAGTTTGAGTACTTTGCGT…
>PrapOR8
ATGAGTTTAGTCATAGCTAAACAGGAAATAAAAGATTCCTTAAAGCTATGCAATTTCTTTATGAAACTTATTGGATTTACGTTACACAAACCGACGAATTTATATGATATTATTATTCAGAAGATAATATTTACAGTAACCATTACATGCGTTACCTTTCATGTGTTTACTGAATTATCATTCCTTTATGTCACATCAACAAATTCGCCGCGGGTCGAAGATGTGGTGACTTTGATACACACGGCTGGATACGGAATATTGAGTATTACAAAGTTCACTGTGCTCTGTTTTAAAAGAAAAATATTTGCACAACTACTGGATGACCTGGCAACAATATGGCCGGTGCCACCTCTTGCTAAAGGAGCTCAGACTTTAAAGATTAACAGCCTTAAATCCCTC…
>PrapOR9
ATGGAAAATGAAACTCTAGCGAAACAAGAAATTAAGGATTCGCTTAAGCTTAGTAATACTATTTTAAAACTACTTGGTTTTACGTTAAATAAACCAGCAACTGTAACTGATGCTGTTGTTCAAAAATGTTTATTTATTACCACTATTGTTATCATCACTATTCACGTTCTTAGTGAATTGGCGTGTCTCTATGTTACATCCATAACTACGCCACAGGTTGATCAAGTAGTTCCTTTACTCCACATAGTTGGCTATGGAACATTGGGTATATTGAAATTCACTGTACTATGTTCCAAAAGAAAAGTGTTTGCACAATTATTGAGTGACCTGGCCACAATATGGCCGGTACCGCCTCTTGTGAAGGAAGCTCAGAGTTTGAAGAATAGCAATTTGCGAACT…
>PrapOrco
ATGCTGAATAAAGTCAAGACACAAGGTCTGGTGTCAGACTTGATGCCAAACATCAAGCTTATGCAAATGGCCGGACATTTCTTGTTCAATTATCATTCTGAGAATGATGGCATGACATCTCTACTCCGGAAGGTGTATGCCAGTGTTCATGCTCTCTTGATTGTCACCCAGTACTTGTGCATGGTGGCTAACATGGCCCAATACTCCGATGAAGTAAACGAACTCACGGCAAATACAATCACAATTCTTTTTTTCGCGCACTCGATTATCAAGCTGTTGTTTTTTGCTATCACTTCTAAGAATTTTTATAGGACCCTCGCAGTATGGAATCAGTCGAACAGCCACCCGCTCTTCACTGAGTCTGATGCTCGATACCACCAACTAGCCTTGACGAAGATG…
