# Supplementary material for: Sympatric Pieris butterfly species exhibit a high conservation of chemoreceptors
Source: Front Cell Neurosci. 2023 May 11;17:1155405. doi: 10.3389/fncel.2023.1155405 (PMC10210156; doi:10.3389/fncel.2023.1155405)
Supplement: Supplementary file 3 [file Table_3.xlsx]

## Sheet: Sheet1
Submission ID	Gene name	GeneBank accession number		Submission ID	Gene name	GeneBank accession number	SRA BioProject Accession number
BankIt2669513	PbraOR1	OQ388448		SUB13167905	Pbra_ant1	SAMN34367726	PRJNA961744
BankIt2669513	PbraOR2	OQ388449		SUB13167905	Pbra_ant2	SAMN34367727	PRJNA961744
BankIt2669513	PbraOR3	OQ388450		SUB13167905	Pbra_ant3	SAMN34367728	PRJNA961744
BankIt2669513	PbraOR4	OQ388451		SUB13167905	Prap_ant1	SAMN34367729	PRJNA961744
BankIt2669513	PbraOR5	OQ388452		SUB13167905	Prap_ant2	SAMN34367730	PRJNA961744
BankIt2669513	PbraOR6	OQ388453		SUB13167905	Prap_ant3	SAMN34367731	PRJNA961744
BankIt2669513	PbraOR7	OQ388454
BankIt2669513	PbraOR8	OQ388455
BankIt2669513	PbraOR9	OQ388456
BankIt2669513	PbraOR11	OQ388457
BankIt2669513	PbraOR12	OQ388458
BankIt2669513	PbraOR13	OQ388459
BankIt2669513	PbraOR14	OQ388460
BankIt2669513	PbraOR15	OQ388461
BankIt2669513	PbraOR16	OQ388462
BankIt2669513	PbraOR17	OQ388463
BankIt2669513	PbraOR18	OQ388464
BankIt2669513	PbraOR19	OQ388465
BankIt2669513	PbraOR20	OQ388466
BankIt2669513	PbraOR24	OQ388467
BankIt2669513	PbraOR25	OQ388468
BankIt2669513	PbraOR26	OQ388469
BankIt2669513	PbraOR27	OQ388470
BankIt2669513	PbraOR23	OQ388471
BankIt2669513	PbraOR28	OQ388472
BankIt2669513	PbraOR29	OQ388473
BankIt2669513	PbraOR30	OQ388474
BankIt2669513	PbraOR32	OQ388475
BankIt2669513	PbraOR33	OQ388476
BankIt2669513	PbraOR34	OQ388477
BankIt2669513	PbraOR35	OQ388478
BankIt2669513	PbraOR36	OQ388479
BankIt2669513	PbraOR37	OQ388480
BankIt2669513	PbraOR38	OQ388481
BankIt2669513	PbraOR39	OQ388482
BankIt2669513	PbraOR40	OQ388483
BankIt2669513	PbraOR41	OQ388484
BankIt2669513	PbraOR43	OQ388485
BankIt2669513	PbraOR44	OQ388486
BankIt2669513	PbraOR45a	OQ388487
BankIt2669513	PbraOR45b	OQ388488
BankIt2669513	PbraOR46	OQ388489
BankIt2669513	PbraOR47	OQ388490
BankIt2669513	PbraOR48	OQ388491
BankIt2669513	PbraOR49	OQ388492
BankIt2669513	PbraOR50	OQ388493
BankIt2669513	PbraOR51	OQ388494
BankIt2669513	PbraOR52	OQ388495
BankIt2669513	PbraOR53	OQ388496
BankIt2669513	PbraOR54	OQ388497
BankIt2669513	PbraOR55	OQ388498
BankIt2669513	PbraOR56	OQ388499
BankIt2669513	PbraOR57	OQ388500
BankIt2669513	PbraOR58	OQ388501
BankIt2669513	PbraOR59	OQ388502
BankIt2669513	PbraOR60	OQ388503
BankIt2669513	PbraOR61	OQ388504
BankIt2669513	PbraOR62	OQ388505
BankIt2669513	PbraOR63	OQ388506
BankIt2669513	PbraOrco	OQ388507
BankIt2669513	PrapOR1	OQ388508
BankIt2669513	PrapOR2	OQ388509
BankIt2669513	PrapOR3	OQ388510
BankIt2669513	PrapOR4	OQ388511
BankIt2669513	PrapOR5	OQ388512
BankIt2669513	PrapOR6	OQ388513
BankIt2669513	PrapOR7	OQ388514
BankIt2669513	PrapOR8	OQ388515
BankIt2669513	PrapOR9	OQ388516
BankIt2669513	PrapOR11	OQ388517
BankIt2669513	PrapOR12	OQ388518
BankIt2669513	PrapOR13	OQ388519
BankIt2669513	PrapOR14	OQ388520
BankIt2669513	PrapOR15	OQ388521
BankIt2669513	PrapOR16	OQ388522
BankIt2669513	PrapOR17	OQ388523
BankIt2669513	PrapOR18	OQ388524
BankIt2669513	PrapOR19	OQ388525
BankIt2669513	PrapOR20	OQ388526
BankIt2669513	PrapOR23	OQ388527
BankIt2669513	PrapOR24	OQ388528
BankIt2669513	PrapOR25	OQ388529
BankIt2669513	PrapOR26	OQ388530
BankIt2669513	PrapOR27	OQ388531
BankIt2669513	PrapOR28	OQ388532
BankIt2669513	PrapOR29	OQ388533
BankIt2669513	PrapOR30	OQ388534
BankIt2669513	PrapOR32	OQ388535
BankIt2669513	PrapOR33	OQ388536
BankIt2669513	PrapOR34	OQ388537
BankIt2669513	PrapOR35	OQ388538
BankIt2669513	PrapOR36	OQ388539
BankIt2669513	PrapOR37	OQ388540
BankIt2669513	PrapOR38	OQ388541
BankIt2669513	PrapOR39	OQ388542
BankIt2669513	PrapOR40	OQ388543
BankIt2669513	PrapOR41	OQ388544
BankIt2669513	PrapOR43	OQ388545
BankIt2669513	PrapOR44	OQ388546
BankIt2669513	PrapOR45a	OQ388547
BankIt2669513	PrapOR45b	OQ388548
BankIt2669513	PrapOR46	OQ388549
BankIt2669513	PrapOR47	OQ388550
BankIt2669513	PrapOR48	OQ388551
BankIt2669513	PrapOR49	OQ388552
BankIt2669513	PrapOR50	OQ388553
BankIt2669513	PrapOR51	OQ388554
BankIt2669513	PrapOR52	OQ388555
BankIt2669513	PrapOR53	OQ388556
BankIt2669513	PrapOR54	OQ388557
BankIt2669513	PrapOR55	OQ388558
BankIt2669513	PrapOR56	OQ388559
BankIt2669513	PrapOR57	OQ388560
BankIt2669513	PrapOR58	OQ388561
BankIt2669513	PrapOR59	OQ388562
BankIt2669513	PrapOR60	OQ388563
BankIt2669513	PrapOR61	OQ388564
BankIt2669513	PrapOR62	OQ388565
BankIt2669513	PrapOR63	OQ388566
BankIt2669513	PrapOrco	OQ388567
BankIt2669513	PbraIR1.1	OQ388568
BankIt2669513	PbraIR1.2	OQ388569
BankIt2669513	PbraIR2	OQ388570
BankIt2669513	PbraIR4	OQ388571
BankIt2669513	PbraIR7d.2	OQ388572
BankIt2669513	PbraIR7d.2.1	OQ388573
BankIt2669513	PbraIR7d.2.2	OQ388574
BankIt2669513	PbraIR7d.3	OQ388575
BankIt2669513	PbraIR8a	OQ388576
BankIt2669513	PbraIR21a	OQ388577
BankIt2669513	PbraIR25a1	OQ388578
BankIt2669513	PbraIR25a2	OQ388579
BankIt2669513	PbraIR31a	OQ388580
BankIt2669513	PbraIR40a	OQ388581
BankIt2669513	PbraIR41a	OQ388582
BankIt2669513	PbraIR64a	OQ388583
BankIt2669513	PbraIR68a	OQ388584
BankIt2669513	PbraIR75d	OQ388585
BankIt2669513	PbraIR75p.1	OQ388586
BankIt2669513	PbraIR75p.2	OQ388587
BankIt2669513	PbraIR75q.1	OQ388588
BankIt2669513	PbraIR75q.2	OQ388589
BankIt2669513	PbraIR76b	OQ388590
BankIt2669513	PbraIR85a	OQ388591
BankIt2669513	PbraIR87a	OQ388592
BankIt2669513	PbraIR93a	OQ388593
BankIt2669513	PbraIR100a	OQ388594
BankIt2669513	PbraIR100c	OQ388595
BankIt2669513	PbraIR100d	OQ388596
BankIt2669513	PbraIR100f	OQ388597
BankIt2669513	PbraIR143	OQ388598
BankIt2669513	PrapIR1.1	OQ388599
BankIt2669513	PrapIR1.2	OQ388600
BankIt2669513	PrapIR2	OQ388601
BankIt2669513	PrapIR4	OQ388602
BankIt2669513	PrapIR7d.2	OQ388603
BankIt2669513	PrapIR7d.2.1	OQ388604
BankIt2669513	PrapIR7d.2.2	OQ388605
BankIt2669513	PrapIR7d.4	OQ388606
BankIt2669513	PrapIR7d.3	OQ388607
BankIt2669513	PrapIR8a	OQ388608
BankIt2669513	PrapIR21a	OQ388609
BankIt2669513	PrapIR25a1	OQ388610
BankIt2669513	PrapIR25a2	OQ388611
BankIt2669513	PrapIR31a	OQ388612
BankIt2669513	PrapIR40a	OQ388613
BankIt2669513	PrapIR41a	OQ388614
BankIt2669513	PrapIR64a	OQ388615
BankIt2669513	PrapIR68a	OQ388616
BankIt2669513	PrapIR75d	OQ388617
BankIt2669513	PrapIR75q.1	OQ388618
BankIt2669513	PrapIR75q.2	OQ388619
BankIt2669513	PrapIR75p.1	OQ388620
BankIt2669513	PrapIR75p.2	OQ388621
BankIt2669513	PrapIR76b1	OQ388622
BankIt2669513	PrapIR76b2	OQ388623
BankIt2669513	PrapIR85a	OQ388624
BankIt2669513	PrapIR87a	OQ388625
BankIt2669513	PrapIR93a	OQ388626
BankIt2669513	PrapIR100a	OQ388627
BankIt2669513	PrapIR100c	OQ388628
BankIt2669513	PrapIR100d	OQ388629
BankIt2669513	PrapIR100e	OQ388630
BankIt2669513	PrapIR100f	OQ388631
BankIt2669513	PrapIR143	OQ388632
BankIt2669513	PbraGR1	OQ388633
BankIt2669513	PbraGR2	OQ388634
BankIt2669513	PbraGR3	OQ388635
BankIt2669513	PbraGR4	OQ388636
BankIt2669513	PbraGR5	OQ388637
BankIt2669513	PbraGR6	OQ388638
BankIt2669513	PbraGR7	OQ388639
BankIt2669513	PbraGR12	OQ388640
BankIt2669513	PbraGR13	OQ388641
BankIt2669513	PbraGR14	OQ388642
BankIt2669513	PbraGR15	OQ388643
BankIt2669513	PbraGR17	OQ388644
BankIt2669513	PbraGR22	OQ388645
BankIt2669513	PbraGR42	OQ388646
BankIt2669513	PbraGR44.1	OQ388647
BankIt2669513	PbraGR44.2	OQ388648
BankIt2669513	PbraGR8.1	OQ388649
BankIt2669513	PbraGR8.2	OQ388650
BankIt2669513	PbraGR8.3	OQ388651
BankIt2669513	PbraGR8.4	OQ388652
BankIt2669513	PbraGR9	OQ388653
BankIt2669513	PbraGR10	OQ388654
BankIt2669513	PbraGR16	OQ388655
BankIt2669513	PbraGR18	OQ388656
BankIt2669513	PbraGR27	OQ388657
BankIt2669513	PbraGR28	OQ388658
BankIt2669513	PbraGR29	OQ388659
BankIt2669513	PbraGR30	OQ388660
BankIt2669513	PbraGR31	OQ388661
BankIt2669513	PbraGR46	OQ388662
BankIt2669513	PbraGR52	OQ388663
BankIt2669513	PbraGR54	OQ388664
BankIt2669513	PbraGR61	OQ388665
BankIt2669513	PbraGR63	OQ388666
BankIt2669513	PbraGR64	OQ388667
BankIt2669513	PbraGR65	OQ388668
BankIt2669513	PbraGR66	OQ388669
BankIt2669513	PbraGR68.1	OQ388670
BankIt2669513	PbraGR68.2	OQ388671
BankIt2669513	PrapGR1	OQ388672
BankIt2669513	PrapGR2	OQ388673
BankIt2669513	PrapGR3	OQ388674
BankIt2669513	PrapGR4	OQ388675
BankIt2669513	PrapGR5	OQ388676
BankIt2669513	PrapGR6	OQ388677
BankIt2669513	PrapGR7	OQ388678
BankIt2669513	PrapGR8.1	OQ388679
BankIt2669513	PrapGR8.2	OQ388680
BankIt2669513	PrapGR8.3	OQ388681
BankIt2669513	PrapGR8.4	OQ388682
BankIt2669513	PrapGR9	OQ388683
BankIt2669513	PrapGR10	OQ388684
BankIt2669513	PrapGR12	OQ388685
BankIt2669513	PrapGR13	OQ388686
BankIt2669513	PrapGR14	OQ388687
BankIt2669513	PrapGR15	OQ388688
BankIt2669513	PrapGR16	OQ388689
BankIt2669513	PrapGR17	OQ388690
BankIt2669513	PrapGR18	OQ388691
BankIt2669513	PrapGR22	OQ388692
BankIt2669513	PrapGR27	OQ388693
BankIt2669513	PrapGR28	OQ388694
BankIt2669513	PrapGR29	OQ388695
BankIt2669513	PrapGR30	OQ388696
BankIt2669513	PrapGR31	OQ388697
BankIt2669513	PrapGR42	OQ388698
BankIt2669513	PrapGR44.1	OQ388699
BankIt2669513	PrapGR44.2	OQ388700
BankIt2669513	PrapGR46	OQ388701
BankIt2669513	PrapGR52	OQ388702
BankIt2669513	PrapGR54	OQ388703
BankIt2669513	PrapGR61	OQ388704
BankIt2669513	PrapGR63	OQ388705
BankIt2669513	PrapGR64	OQ388706
BankIt2669513	PrapGR65	OQ388707
BankIt2669513	PrapGR66	OQ388708
BankIt2669513	PrapGR68.1	OQ388709
BankIt2669513	PrapGR68.2	OQ388710
